# Supplementary material for: Helicobacter pylori Genome Aggregation Database reveals complex evolutionary forces shaping its genomic landscape and clinical impact in East Asia
Source: Research Square preprint supplement (doi:10.21203/rs.3.rs-7366252/v1), 2025-08-28
Supplement: Supplementary file 1 [file 36b18b698ac19b7e3cb4f2cb.xlsx]

## Sheet: Extended Data Table 1
Extended Data Table 1| Basic information of strains used in this study.
ID	Re-assignment	fineSTRUCTURE	Classification	7544个样本	Coverage	Contig	Database	Latitude	Longitude	Country	Continent	Host	Species	Ecotype	Host_species	Source
GCA_000008785.1	YES	YES	hpAfrica1	YES	0.9167	1	NCBI	38.7946	-106.535	United_States	North_America	Human	H. pylori	Ubiquitous	Human	Alm et al., 1999, 10.1038/16495
GCA_000185205.1	YES	YES	hpAfrica1	YES	0.9258	2	NCBI	13	-15	Gambia	Africa	Human	H. pylori	Ubiquitous	Human	Tourrette et al., 2024, 10.1038/s41586-024-07991-z from NCBI
GCA_000344945.2	YES	YES	hpAfrica1	YES	0.8732	52	NCBI	13	-15	Gambia	Africa	Human	H. pylori	Ubiquitous	Human	Tourrette et al., 2024, 10.1038/s41586-024-07991-z from NCBI
GCA_000345045.2	YES	YES	hpAfrica1	YES	0.9075	57	NCBI	13	-15	Gambia	Africa	Human	H. pylori	Ubiquitous	Human	Tourrette et al., 2024, 10.1038/s41586-024-07991-z from NCBI
GCA_000345065.2	YES	YES	hpAfrica1	YES	0.8742	48	NCBI	13	-15	Gambia	Africa	Human	H. pylori	Ubiquitous	Human	Tourrette et al., 2024, 10.1038/s41586-024-07991-z from NCBI
GCA_000345085.2	YES	YES	hpAfrica1	YES	0.8998	59	NCBI	13	-15	Gambia	Africa	Human	H. pylori	Ubiquitous	Human	Tourrette et al., 2024, 10.1038/s41586-024-07991-z from NCBI
GCA_000345105.2	YES	YES	hpAfrica1	YES	0.9016	46	NCBI	13	-15	Gambia	Africa	Human	H. pylori	Ubiquitous	Human	Tourrette et al., 2024, 10.1038/s41586-024-07991-z from NCBI
GCA_000345125.2	YES	YES	hpAfrica1	YES	0.91	51	NCBI	13	-15	Gambia	Africa	Human	H. pylori	Ubiquitous	Human	Tourrette et al., 2024, 10.1038/s41586-024-07991-z from NCBI
GCA_000345145.2	YES	YES	hpAfrica1	YES	0.9068	50	NCBI	13	-15	Gambia	Africa	Human	H. pylori	Ubiquitous	Human	Tourrette et al., 2024, 10.1038/s41586-024-07991-z from NCBI
GCA_000345205.2	YES	YES	hpAfrica1	YES	0.8713	69	NCBI	13	-15	Gambia	Africa	Human	H. pylori	Ubiquitous	Human	Tourrette et al., 2024, 10.1038/s41586-024-07991-z from NCBI
HEL_CA3782AA_AS	NO	YES	hpAfrica1	YES	0.8998	56	Entero	5	-72	Colombia	South_America	Human	H. pylori	Ubiquitous	Human	Tourrette et al., 2024, 10.1038/s41586-024-07991-z
GCA_000345245.2	NO	YES	hpAfrica1	YES	0.897	49	NCBI	13	-15	Gambia	Africa	Human	H. pylori	Ubiquitous	Human	Tourrette et al., 2024, 10.1038/s41586-024-07991-z from NCBI
GCA_000345705.2	NO	YES	hpAfrica1	YES	0.8701	31	NCBI	13	-15	Gambia	Africa	Human	H. pylori	Ubiquitous	Human	Tourrette et al., 2024, 10.1038/s41586-024-07991-z from NCBI
HEL_CA4846AA_AS	NO	YES	hpAfrica1	YES	0.9297	1	Entero	-9.18997	-75.0152	Peru	South_America	Human	H. pylori	Ubiquitous	Human	Tourrette et al., 2024, 10.1038/s41586-024-07991-z from Falush
HEL_CA5622AA_AS	NO	YES	hpAfrica1	YES	0.9216	1	Entero	38.7946	-106.535	United_States	North_America	Human	H. pylori	Ubiquitous	Human	Tourrette et al., 2024, 10.1038/s41586-024-07991-z from Falush
HEL_CA4509AA_AS	NO	YES	hpAfrica1	YES	0.9201	1	Entero	13.4432	-15.3101	Gambia	Africa	Human	H. pylori	Ubiquitous	Human	Tourrette et al., 2024, 10.1038/s41586-024-07991-z from Falush
HEL_CA5637AA_AS	NO	YES	hpAfrica1	YES	0.9189	1	Entero	38.7946	-106.535	United_States	North_America	Human	H. pylori	Ubiquitous	Human	Tourrette et al., 2024, 10.1038/s41586-024-07991-z from Falush
HEL_CA4162AA_AS	NO	YES	hpAfrica1	YES	0.9186	1	Entero	-14.235	-51.9253	Brazil	South_America	Human	H. pylori	Ubiquitous	Human	Tourrette et al., 2024, 10.1038/s41586-024-07991-z from Falush
HEL_CA5598AA_AS	NO	YES	hpAfrica1	YES	0.9173	1	Entero	38.7946	-106.535	United_States	North_America	Human	H. pylori	Ubiquitous	Human	Tourrette et al., 2024, 10.1038/s41586-024-07991-z from Falush
HEL_CA4561AA_AS	NO	YES	hpAfrica1	YES	0.9172	1	Entero	15.2	-86.2419	Honduras	North_America	Human	H. pylori	Ubiquitous	Human	Tourrette et al., 2024, 10.1038/s41586-024-07991-z from Falush
HEL_CA5595AA_AS	NO	YES	hpAfrica1	YES	0.9122	1	Entero	38.7946	-106.535	United_States	North_America	Human	H. pylori	Ubiquitous	Human	Tourrette et al., 2024, 10.1038/s41586-024-07991-z from Falush
HEL_CA4900AA_AS	NO	YES	hpAfrica1	YES	0.9079	1	Entero	39.3999	-8.22445	Portugal	Europe	Human	H. pylori	Ubiquitous	Human	Tourrette et al., 2024, 10.1038/s41586-024-07991-z from Falush
HEL_CA4202AA_AS	NO	YES	hpAfrica1	YES	0.9058	1	Entero	-0.228021	15.8277	Congo	Africa	Human	H. pylori	Ubiquitous	Human	Tourrette et al., 2024, 10.1038/s41586-024-07991-z from Falush
HEL_CA5627AA_AS	NO	YES	hpAfrica1	YES	0.9013	1	Entero	38.7946	-106.535	United_States	North_America	Human	H. pylori	Ubiquitous	Human	Tourrette et al., 2024, 10.1038/s41586-024-07991-z from Falush
HEL_CA4340AA_AS	NO	YES	hpAfrica1	YES	0.8937	1	Entero	18.7357	-70.1627	Dominican_Republic	South_America	Human	H. pylori	Ubiquitous	Human	Tourrette et al., 2024, 10.1038/s41586-024-07991-z from Falush
HEL_AA0356AA_AS	NO	YES	hpAfrica1	YES	0.8853	1	Entero	46.2276	2.21375	France	Europe	Human	H. pylori	Ubiquitous	Human	Avasthi et al., 2011, 10.1128/JB.05006-11
HEL_CA4461AA_AS	NO	YES	hpAfrica1	YES	0.8805	1	Entero	7.94653	-1.02319	Ghana	Africa	Human	H. pylori	Ubiquitous	Human	Tourrette et al., 2024, 10.1038/s41586-024-07991-z from Falush
HEL_BA5566AA_AS	NO	YES	hpAfrica1	YES	0.9127	7	Entero	38.7946	-106.535	United_States	North_America	Human	H. pylori	Ubiquitous	Human	Blanchard et al., 2013, 10.1111/2049-632X.12045
HEL_BA5550AA_AS	NO	YES	hpAfrica1	YES	0.9119	11	Entero	38.7946	-106.535	United_States	North_America	Human	H. pylori	Ubiquitous	Human	Blanchard et al., 2013, 10.1111/2049-632X.12045
HEL_CA5499AA_AS	NO	YES	hpAfrica1	YES	0.9018	11	Entero	38.7946	-106.535	United_States	North_America	Human	H. pylori	Ubiquitous	Human	Tourrette et al., 2024, 10.1038/s41586-024-07991-z from Falush
HEL_BA5561AA_AS	NO	YES	hpAfrica1	YES	0.9112	16	Entero	38.7946	-106.535	United_States	North_America	Human	H. pylori	Ubiquitous	Human	Blanchard et al., 2013, 10.1111/2049-632X.12045
HEL_AA4346AA_AS	NO	YES	hpAfrica1	YES	0.9101	25	Entero	12.1506	-86.2681	Nicaragua	North_America	Human	H. pylori	Ubiquitous	Human	Thorell et al., 2016, 10.1186/s12862-016-0619-y
HEL_BA4902AA_AS	NO	YES	hpAfrica1	YES	0.8875	30	Entero	-25.2744	133.775	Australia	Oceania	Human	H. pylori	Ubiquitous	Human	Chua et al., 2019, 10.1093/gastro/goy048
HEL_AA5482AA_AS	NO	YES	hpAfrica1	YES	0.8701	32	Entero	13	-15	Gambia	Africa	Human	H. pylori	Ubiquitous	Human	Tourrette et al., 2024, 10.1038/s41586-024-07991-z from Entero database
HEL_BA4945AA_AS	NO	YES	hpAfrica1	YES	0.9047	39	Entero	-25.2744	133.775	Australia	Oceania	Human	H. pylori	Ubiquitous	Human	Chua et al., 2019, 10.1093/gastro/goy048
HEL_BA9695AA_AS	NO	YES	hpAfrica1	YES	0.9063	40	Entero	-0.85	-71.41	Colombia	South_America	Human	H. pylori	Ubiquitous	Human	Tourrette et al., 2024, 10.1038/s41586-024-07991-z
HEL_BA4729AA_AS	NO	YES	hpAfrica1	YES	0.8703	40	Entero	47.3667	8.55	Switzerland	Europe	Human	H. pylori	Ubiquitous	Human	University Hospital Basel
HEL_AA1847AA_AS	NO	YES	hpAfrica1	YES	0.9087	42	Entero	46.2276	2.21375	France	Europe	Human	H. pylori	Ubiquitous	Human	Vale et al., 2017, 10.1038/srep42471
HEL_BA4900AA_AS	NO	YES	hpAfrica1	YES	0.8853	44	Entero	-25.2744	133.775	Australia	Oceania	Human	H. pylori	Ubiquitous	Human	Chua et al., 2019, 10.1093/gastro/goy048
HEL_BA5704AA_AS	NO	YES	hpAfrica1	YES	0.8953	46	Entero	-30.5595	22.9375	South_Africa	Africa	Human	H. pylori	Ubiquitous	Human	Didelot et al., 2013, 10.1073/pnas.1304681110
HEL_AA5463AA_AS	NO	YES	hpAfrica1	YES	0.8748	51	Entero	13	-15	Gambia	Africa	Human	H. pylori	Ubiquitous	Human	Human Microbiome Project (HMP)
HEL_BA8848AA_AS	NO	YES	hpAfrica1	YES	0.8993	53	Entero	-33.9	18.49	South_Africa	Africa	Human	H. pylori	Ubiquitous	Human	Tourrette et al., 2024, 10.1038/s41586-024-07991-z
HEL_BA5002AA_AS	NO	YES	hpAfrica1	YES	0.9002	57	Entero	-25.2744	133.775	Australia	Oceania	Human	H. pylori	Ubiquitous	Human	Chua et al., 2019, 10.1093/gastro/goy048
HEL_AA5874AA_AS	NO	YES	hpAfrica1	YES	0.9011	60	Entero	13	-15	Gambia	Africa	Human	H. pylori	Ubiquitous	Human	Human Microbiome Project (HMP)
HEL_AA5506AA_AS	NO	YES	hpAfrica1	YES	0.8693	65	Entero	13	-15	Gambia	Africa	Human	H. pylori	Ubiquitous	Human	Human Microbiome Project (HMP)
HEL_AA5488AA_AS	NO	YES	hpAfrica1	YES	0.8687	71	Entero	13	-15	Gambia	Africa	Human	H. pylori	Ubiquitous	Human	Human Microbiome Project (HMP)
HEL_CA6253AA_AS	NO	YES	hpAfrica1	YES	0.8929	73	Entero	39.3999	-8.22445	Portugal	Europe	Human	H. pylori	Ubiquitous	Human	Tourrette et al., 2024, 10.1038/s41586-024-07991-z from Falush
HEL_CA3716AA_AS	NO	YES	hpAfrica1	YES	0.8828	130	Entero	-0.22802	15.8277	Congo	Africa	Human	H. pylori	Ubiquitous	Human	Tourrette et al., 2024, 10.1038/s41586-024-07991-z
HEL_CA3825AA_AS	NO	NO	hpAfrica1	YES	0.9088	70	Entero	18.7357	-70.1627	Dominican_Republic	South_America	Human	H. pylori	Ubiquitous	Human	Tourrette et al., 2024, 10.1038/s41586-024-07991-z
HEL_CA4469AA_AS	NO	NO	hpAfrica1	YES	0.9127	1	Entero	13.4432	-15.3101	Gambia	Africa	Human	H. pylori	Ubiquitous	Human	Tourrette et al., 2024, 10.1038/s41586-024-07991-z from Falush
HEL_CA4474AA_AS	NO	NO	hpAfrica1	YES	0.8873	1	Entero	13.4432	-15.3101	Gambia	Africa	Human	H. pylori	Ubiquitous	Human	Tourrette et al., 2024, 10.1038/s41586-024-07991-z from Falush
HEL_BA8159AA_AS	NO	NO	hpAfrica1	YES	0.9104	9	Entero	38.7946	-106.535	United_States	North_America	Human	H. pylori	Ubiquitous	Human	Blanchard et al., 2013, 10.1111/2049-632X.12045
HEL_AA5480AA_AS	NO	NO	hpAfrica1	YES	0.8752	50	Entero	13	-15	Gambia	Africa	Human	H. pylori	Ubiquitous	Human	Human Microbiome Project (HMP)
HEL_CA3732AA_AS	NO	NO	hpAfrica1	YES	0.9036	55	Entero	-0.22802	15.8277	Congo	Africa	Human	H. pylori	Ubiquitous	Human	Tourrette et al., 2024, 10.1038/s41586-024-07991-z
HEL_CA3814AA_AS	NO	NO	hpAfrica1	YES	0.9157	68	Entero	18.7357	-70.1627	Dominican_Republic	South_America	Human	H. pylori	Ubiquitous	Human	Tourrette et al., 2024, 10.1038/s41586-024-07991-z
HEL_CA5809AA_AS	NO	NO	hpAfrica1	YES	0.8848	73	Entero	-0.22802	15.8277	Congo	Africa	Human	H. pylori	Ubiquitous	Human	Tourrette et al., 2024, 10.1038/s41586-024-07991-z
GCA_009740495.1	NO	NO	hpAfrica1	YES	0.8904	54	NCBI	38.7946	-106.535	United_States	North_America	Human	H. pylori	Ubiquitous	Human	Saranathan et al., 2020, 10.1128/JCM.01591-19
GCA_011105805.1	NO	NO	hpAfrica1	YES	0.8967	137	NCBI	23.6345	-102.553	Mexico	North_America	Human	H. pylori	Ubiquitous	Human	Muñoz-Ramirez et al., 2017, 10.3389/fcimb.2017.00050
GCA_011175015.1	NO	NO	hpAfrica1	YES	0.8991	39	NCBI	60.1282	18.6435	Sweden	Europe	Human	H. pylori	Ubiquitous	Human	Tourrette et al., 2024, 10.1038/s41586-024-07991-z from NCBI
GCA_014498265.1	NO	NO	hpAfrica1	YES	0.9053	36	NCBI	-38.4161	-63.6167	Argentina	South_America	Human	H. pylori	Ubiquitous	Human	Muñoz-Ramirez et al., 2020, 10.1038/s41396-020-00758-0
HEL_AA0225AA_AS	NO	NO	hpAfrica1	YES	0.9115	47	Entero	46.2276	2.21375	France	Europe	Human	H. pylori	Ubiquitous	Human	Vale et al., 2017, 10.1038/srep42471
HEL_AA0318AA_AS	NO	NO	hpAfrica1	YES	0.9021	1	Entero	-33.55	18.25	South_Africa	Africa	Human	H. pylori	Ubiquitous	Human	Montano et al., 2015, 0.1534/genetics.115.176404
HEL_AA0439AA_AS	NO	NO	hpAfrica1	YES	0.8726	72	Entero	12.1506	-86.2681	Nicaragua	North_America	Human	H. pylori	Ubiquitous	Human	Gothenburg University
HEL_AA6874AA_AS	NO	NO	hpAfrica1	YES	0.8999	26	Entero	23.6345	-102.553	Mexico	North_America	Human	H. pylori	Ubiquitous	Human	Muñoz-Ramirez et al., 2020, 10.1038/s41396-020-00758-0
HEL_BA5457AA_AS	NO	NO	hpAfrica1	YES	0.9131	54	Entero	38.7946	-106.535	United_States	North_America	Human	H. pylori	Ubiquitous	Human	Blanchard et al., 2013, 10.1111/2049-632X.12045
HEL_BA5531AA_AS	NO	NO	hpAfrica1	YES	0.9207	11	Entero	38.7946	-106.535	United_States	North_America	Human	H. pylori	Ubiquitous	Human	Blanchard et al., 2013, 10.1111/2049-632X.12045
HEL_BA5639AA_AS	NO	NO	hpAfrica1	YES	0.8955	75	Entero	-30.5595	22.9375	South_Africa	Africa	Human	H. pylori	Ubiquitous	Human	Didelot et al., 2013, 10.1073/pnas.1304681110
HEL_BA5702AA_AS	NO	NO	hpAfrica1	YES	0.9055	54	Entero	-30.5595	22.9375	South_Africa	Africa	Human	H. pylori	Ubiquitous	Human	European Bioinformatics Institute
HEL_BA8293AA_AS	NO	NO	hpAfrica1	YES	0.9012	47	Entero	-30.5595	22.9375	South_Africa	Africa	Human	H. pylori	Ubiquitous	Human	European Bioinformatics Institute
HEL_BA9230AA_AS	NO	NO	hpAfrica1	YES	0.9078	37	Entero	-30.5595	22.9375	South_Africa	Africa	Human	H. pylori	Ubiquitous	Human	Tourrette et al., 2024, 10.1038/s41586-024-07991-z
HEL_BA9403AA_AS	NO	NO	hpAfrica1	YES	0.9016	30	Entero	30.53	-91.15	United_States	North_America	Human	H. pylori	Ubiquitous	Human	Tourrette et al., 2024, 10.1038/s41586-024-07991-z
HEL_CA3737AA_AS	NO	NO	hpAfrica1	YES	0.8896	68	Entero	-0.22802	15.8277	Congo	Africa	Human	H. pylori	Ubiquitous	Human	Tourrette et al., 2024, 10.1038/s41586-024-07991-z
HEL_CA5623AA_AS	NO	NO	hpAfrica1	YES	0.8867	1	Entero	38.7946	-106.535	United_States	North_America	Human	H. pylori	Ubiquitous	Human	Tourrette et al., 2024, 10.1038/s41586-024-07991-z from Falush
HEL_BA3535AA_AS	NO	NO	hpAfrica1	YES	0.9164	1	Entero	23.6345	-102.553	Mexico	North_America	Human	H. pylori	Ubiquitous	Human	Camorlinga-Ponce et al., 2021, 10.3389/fcimb.2020.539115
HEL_CA4559AA_AS	NO	NO	hpAfrica1	YES	0.9164	1	Entero	15.2	-86.2419	Honduras	North_America	Human	H. pylori	Ubiquitous	Human	Tourrette et al., 2024, 10.1038/s41586-024-07991-z from Falush
HEL_CA4565AA_AS	NO	NO	hpAfrica1	YES	0.9134	1	Entero	15.2	-86.2419	Honduras	North_America	Human	H. pylori	Ubiquitous	Human	Tourrette et al., 2024, 10.1038/s41586-024-07991-z from Falush
HEL_CA4566AA_AS	NO	NO	hpAfrica1	YES	0.9133	1	Entero	15.2	-86.2419	Honduras	North_America	Human	H. pylori	Ubiquitous	Human	Tourrette et al., 2024, 10.1038/s41586-024-07991-z from Falush
HEL_CA4557AA_AS	NO	NO	hpAfrica1	YES	0.9119	1	Entero	15.2	-86.2419	Honduras	North_America	Human	H. pylori	Ubiquitous	Human	Tourrette et al., 2024, 10.1038/s41586-024-07991-z from Falush
HEL_CA4573AA_AS	NO	NO	hpAfrica1	YES	0.9107	1	Entero	15.2	-86.2419	Honduras	North_America	Human	H. pylori	Ubiquitous	Human	Tourrette et al., 2024, 10.1038/s41586-024-07991-z from Falush
HEL_CA4551AA_AS	NO	NO	hpAfrica1	YES	0.9073	1	Entero	15.2	-86.2419	Honduras	North_America	Human	H. pylori	Ubiquitous	Human	Tourrette et al., 2024, 10.1038/s41586-024-07991-z from Falush
HEL_CA4518AA_AS	NO	NO	hpAfrica1	YES	0.9051	1	Entero	15.2	-86.2419	Honduras	North_America	Human	H. pylori	Ubiquitous	Human	Tourrette et al., 2024, 10.1038/s41586-024-07991-z from Falush
HEL_CA5029AA_AS	NO	NO	hpAfrica1	YES	0.934	1	Entero	40.45	-3.25	Spain	Europe	Human	H. pylori	Ubiquitous	Human	Tourrette et al., 2024, 10.1038/s41586-024-07991-z from Falush
HEL_CA5634AA_AS	NO	NO	hpAfrica1	YES	0.9254	1	Entero	38.7946	-106.535	United_States	North_America	Human	H. pylori	Ubiquitous	Human	Tourrette et al., 2024, 10.1038/s41586-024-07991-z from Falush
HEL_CA4852AA_AS	NO	NO	hpAfrica1	YES	0.9233	1	Entero	-9.18997	-75.0152	Peru	South_America	Human	H. pylori	Ubiquitous	Human	Tourrette et al., 2024, 10.1038/s41586-024-07991-z from Falush
HEL_CA4155AA_AS	NO	NO	hpAfrica1	YES	0.9232	1	Entero	-14.235	-51.9253	Brazil	South_America	Human	H. pylori	Ubiquitous	Human	Tourrette et al., 2024, 10.1038/s41586-024-07991-z from Falush
HEL_CA4172AA_AS	NO	NO	hpAfrica1	YES	0.9222	1	Entero	56.1304	-106.347	Canada	North_America	Human	H. pylori	Ubiquitous	Human	Tourrette et al., 2024, 10.1038/s41586-024-07991-z from Falush
HEL_CA4183AA_AS	NO	NO	hpAfrica1	YES	0.922	1	Entero	-14.235	-51.9253	Brazil	South_America	Human	H. pylori	Ubiquitous	Human	Tourrette et al., 2024, 10.1038/s41586-024-07991-z from Falush
HEL_CA5741AA_AS	NO	NO	hpAfrica1	YES	0.9218	1	Entero	38.7946	-106.535	United_States	North_America	Human	H. pylori	Ubiquitous	Human	Tourrette et al., 2024, 10.1038/s41586-024-07991-z from Falush
HEL_AA0343AA_AS	NO	NO	hpAfrica1	YES	0.9218	1	Entero	-9.18997	-75.0152	Peru	South_America	Human	H. pylori	Ubiquitous	Human	Tourrette et al., 2024, 10.1038/s41586-024-07991-z from Entero database
HEL_CA5714AA_AS	NO	NO	hpAfrica1	YES	0.9215	1	Entero	38.7946	-106.535	United_States	North_America	Human	H. pylori	Ubiquitous	Human	Tourrette et al., 2024, 10.1038/s41586-024-07991-z from Falush
HEL_CA4338AA_AS	NO	NO	hpAfrica1	YES	0.9212	1	Entero	4.57087	-74.2973	Colombia	South_America	Human	H. pylori	Ubiquitous	Human	Tourrette et al., 2024, 10.1038/s41586-024-07991-z from Falush
HEL_CA5596AA_AS	NO	NO	hpAfrica1	YES	0.9208	1	Entero	38.7946	-106.535	United_States	North_America	Human	H. pylori	Ubiquitous	Human	Tourrette et al., 2024, 10.1038/s41586-024-07991-z from Falush
HEL_CA5017AA_AS	NO	NO	hpAfrica1	YES	0.9207	1	Entero	40.45	-3.25	Spain	Europe	Human	H. pylori	Ubiquitous	Human	Tourrette et al., 2024, 10.1038/s41586-024-07991-z from Falush
HEL_CA5460AA_AS	NO	NO	hpAfrica1	YES	0.9201	1	Entero	-30.5595	22.9375	South_Africa	Africa	Human	H. pylori	Ubiquitous	Human	Tourrette et al., 2024, 10.1038/s41586-024-07991-z from Falush
HEL_CA5704AA_AS	NO	NO	hpAfrica1	YES	0.9199	1	Entero	38.7946	-106.535	United_States	North_America	Human	H. pylori	Ubiquitous	Human	Tourrette et al., 2024, 10.1038/s41586-024-07991-z from Falush
HEL_CA4401AA_AS	NO	NO	hpAfrica1	YES	0.9198	1	Entero	56.1304	-106.347	Canada	North_America	Human	H. pylori	Ubiquitous	Human	Tourrette et al., 2024, 10.1038/s41586-024-07991-z from Falush
HEL_CA4564AA_AS	NO	NO	hpAfrica1	YES	0.9196	1	Entero	15.2	-86.2419	Honduras	North_America	Human	H. pylori	Ubiquitous	Human	Tourrette et al., 2024, 10.1038/s41586-024-07991-z from Falush
HEL_CA4218AA_AS	NO	NO	hpAfrica1	YES	0.9193	1	Entero	-0.228021	15.8277	Congo	Africa	Human	H. pylori	Ubiquitous	Human	Tourrette et al., 2024, 10.1038/s41586-024-07991-z from Falush
HEL_CA4843AA_AS	NO	NO	hpAfrica1	YES	0.9191	1	Entero	9.082	8.67528	Nigeria	Africa	Human	H. pylori	Ubiquitous	Human	Tourrette et al., 2024, 10.1038/s41586-024-07991-z from Falush
HEL_CA5795AA_AS	NO	NO	hpAfrica1	YES	0.919	1	Entero	38.7946	-106.535	United_States	North_America	Human	H. pylori	Ubiquitous	Human	Tourrette et al., 2024, 10.1038/s41586-024-07991-z from Falush
HEL_CA4835AA_AS	NO	NO	hpAfrica1	YES	0.9182	1	Entero	9.082	8.67528	Nigeria	Africa	Human	H. pylori	Ubiquitous	Human	Tourrette et al., 2024, 10.1038/s41586-024-07991-z from Falush
HEL_CA4332AA_AS	NO	NO	hpAfrica1	YES	0.9181	1	Entero	4.57087	-74.2973	Colombia	South_America	Human	H. pylori	Ubiquitous	Human	Tourrette et al., 2024, 10.1038/s41586-024-07991-z from Falush
HEL_CA4873AA_AS	NO	NO	hpAfrica1	YES	0.9181	1	Entero	-9.18997	-75.0152	Peru	South_America	Human	H. pylori	Ubiquitous	Human	Tourrette et al., 2024, 10.1038/s41586-024-07991-z from Falush
HEL_CA5604AA_AS	NO	NO	hpAfrica1	YES	0.918	1	Entero	38.7946	-106.535	United_States	North_America	Human	H. pylori	Ubiquitous	Human	Tourrette et al., 2024, 10.1038/s41586-024-07991-z from Falush
HEL_CA4156AA_AS	NO	NO	hpAfrica1	YES	0.9179	1	Entero	-14.235	-51.9253	Brazil	South_America	Human	H. pylori	Ubiquitous	Human	Tourrette et al., 2024, 10.1038/s41586-024-07991-z from Falush
HEL_CA5647AA_AS	NO	NO	hpAfrica1	YES	0.9172	1	Entero	38.7946	-106.535	United_States	North_America	Human	H. pylori	Ubiquitous	Human	Tourrette et al., 2024, 10.1038/s41586-024-07991-z from Falush
HEL_CA4344AA_AS	NO	NO	hpAfrica1	YES	0.9171	1	Entero	4.57087	-74.2973	Colombia	South_America	Human	H. pylori	Ubiquitous	Human	Tourrette et al., 2024, 10.1038/s41586-024-07991-z from Falush
HEL_CA5650AA_AS	NO	NO	hpAfrica1	YES	0.9168	1	Entero	38.7946	-106.535	United_States	North_America	Human	H. pylori	Ubiquitous	Human	Tourrette et al., 2024, 10.1038/s41586-024-07991-z from Falush
HEL_CA4324AA_AS	NO	NO	hpAfrica1	YES	0.9166	1	Entero	4.57087	-74.2973	Colombia	South_America	Human	H. pylori	Ubiquitous	Human	Tourrette et al., 2024, 10.1038/s41586-024-07991-z from Falush
HEL_CA4568AA_AS	NO	NO	hpAfrica1	YES	0.9165	1	Entero	15.2	-86.2419	Honduras	North_America	Human	H. pylori	Ubiquitous	Human	Tourrette et al., 2024, 10.1038/s41586-024-07991-z from Falush
HEL_CA4505AA_AS	NO	NO	hpAfrica1	YES	0.9161	1	Entero	13.4432	-15.3101	Gambia	Africa	Human	H. pylori	Ubiquitous	Human	Tourrette et al., 2024, 10.1038/s41586-024-07991-z from Falush
HEL_CA4199AA_AS	NO	NO	hpAfrica1	YES	0.916	1	Entero	-0.228021	15.8277	Congo	Africa	Human	H. pylori	Ubiquitous	Human	Tourrette et al., 2024, 10.1038/s41586-024-07991-z from Falush
HEL_CA5000AA_AS	NO	NO	hpAfrica1	YES	0.9157	1	Entero	40.45	-3.25	Spain	Europe	Human	H. pylori	Ubiquitous	Human	Tourrette et al., 2024, 10.1038/s41586-024-07991-z from Falush
HEL_CA4343AA_AS	NO	NO	hpAfrica1	YES	0.9155	1	Entero	4.57087	-74.2973	Colombia	South_America	Human	H. pylori	Ubiquitous	Human	Tourrette et al., 2024, 10.1038/s41586-024-07991-z from Falush
HEL_CA4113AA_AS	NO	NO	hpAfrica1	YES	0.9154	1	Entero	-14.235	-51.9253	Brazil	South_America	Human	H. pylori	Ubiquitous	Human	Tourrette et al., 2024, 10.1038/s41586-024-07991-z from Falush
HEL_CA5602AA_AS	NO	NO	hpAfrica1	YES	0.9149	1	Entero	38.7946	-106.535	United_States	North_America	Human	H. pylori	Ubiquitous	Human	Tourrette et al., 2024, 10.1038/s41586-024-07991-z from Falush
HEL_CA5607AA_AS	NO	NO	hpAfrica1	YES	0.9145	1	Entero	38.7946	-106.535	United_States	North_America	Human	H. pylori	Ubiquitous	Human	Tourrette et al., 2024, 10.1038/s41586-024-07991-z from Falush
HEL_CA4555AA_AS	NO	NO	hpAfrica1	YES	0.9143	1	Entero	15.7835	-90.2308	Guatemala	North_America	Human	H. pylori	Ubiquitous	Human	Tourrette et al., 2024, 10.1038/s41586-024-07991-z from Falush
HEL_CA4549AA_AS	NO	NO	hpAfrica1	YES	0.9136	1	Entero	15.2	-86.2419	Honduras	North_America	Human	H. pylori	Ubiquitous	Human	Tourrette et al., 2024, 10.1038/s41586-024-07991-z from Falush
GCA_016749455.1	NO	NO	hpAfrica1	YES	0.9134	1	NCBI	-9.18997	-75.0152	Peru	South_America	Human	H. pylori	Ubiquitous	Human	Gutierrez-Escobar et al., 2020, 10.3389/fmicb.2020.601839
HEL_CA4536AA_AS	NO	NO	hpAfrica1	YES	0.9134	1	Entero	15.2	-86.2419	Honduras	North_America	Human	H. pylori	Ubiquitous	Human	Tourrette et al., 2024, 10.1038/s41586-024-07991-z from Falush
HEL_CA5032AA_AS	NO	NO	hpAfrica1	YES	0.9131	1	Entero	40.45	-3.25	Spain	Europe	Human	H. pylori	Ubiquitous	Human	Tourrette et al., 2024, 10.1038/s41586-024-07991-z from Falush
HEL_CA5616AA_AS	NO	NO	hpAfrica1	YES	0.9129	1	Entero	38.7946	-106.535	United_States	North_America	Human	H. pylori	Ubiquitous	Human	Tourrette et al., 2024, 10.1038/s41586-024-07991-z from Falush
HEL_CA4110AA_AS	NO	NO	hpAfrica1	YES	0.9128	1	Entero	56.1304	-106.347	Canada	North_America	Human	H. pylori	Ubiquitous	Human	Tourrette et al., 2024, 10.1038/s41586-024-07991-z from Falush
HEL_CA5611AA_AS	NO	NO	hpAfrica1	YES	0.9127	1	Entero	-30.5595	22.9375	South_Africa	Africa	Human	H. pylori	Ubiquitous	Human	Tourrette et al., 2024, 10.1038/s41586-024-07991-z from Falush
HEL_CA5590AA_AS	NO	NO	hpAfrica1	YES	0.912	1	Entero	38.7946	-106.535	United_States	North_America	Human	H. pylori	Ubiquitous	Human	Tourrette et al., 2024, 10.1038/s41586-024-07991-z from Falush
HEL_CA5784AA_AS	NO	NO	hpAfrica1	YES	0.9119	1	Entero	38.7946	-106.535	United_States	North_America	Human	H. pylori	Ubiquitous	Human	Tourrette et al., 2024, 10.1038/s41586-024-07991-z from Falush
HEL_AA4428AA_AS	NO	NO	hpAfrica1	YES	0.9116	1	Entero	-0.228021	15.8277	Congo	Africa	Human	H. pylori	Ubiquitous	Human	EBI
HEL_CA4173AA_AS	NO	NO	hpAfrica1	YES	0.9109	1	Entero	-14.235	-51.9253	Brazil	South_America	Human	H. pylori	Ubiquitous	Human	Tourrette et al., 2024, 10.1038/s41586-024-07991-z from Falush
HEL_BA3551AA_AS	NO	NO	hpAfrica1	YES	0.9108	1	Entero	23.6345	-102.553	Mexico	North_America	Human	H. pylori	Ubiquitous	Human	Camorlinga-Ponce et al., 2021, 10.3389/fcimb.2020.539115
HEL_CA0041AA_AS	NO	NO	hpAfrica1	YES	0.9106	1	Entero	23.1291	113.264	China	East_Asia	Human	H. pylori	Ubiquitous	Human	You, Thorell, et al., 2022, 10.1099/mgen.0.000676
HEL_CA4123AA_AS	NO	NO	hpAfrica1	YES	0.9105	1	Entero	-38.4161	-63.6167	Argentina	South_America	Human	H. pylori	Ubiquitous	Human	Tourrette et al., 2024, 10.1038/s41586-024-07991-z from Falush
HEL_CA4175AA_AS	NO	NO	hpAfrica1	YES	0.9105	1	Entero	-14.235	-51.9253	Brazil	South_America	Human	H. pylori	Ubiquitous	Human	Tourrette et al., 2024, 10.1038/s41586-024-07991-z from Falush
HEL_CA5588AA_AS	NO	NO	hpAfrica1	YES	0.9102	1	Entero	38.7946	-106.535	United_States	North_America	Human	H. pylori	Ubiquitous	Human	Tourrette et al., 2024, 10.1038/s41586-024-07991-z from Falush
HEL_CA4205AA_AS	NO	NO	hpAfrica1	YES	0.9101	1	Entero	-0.228021	15.8277	Congo	Africa	Human	H. pylori	Ubiquitous	Human	Tourrette et al., 2024, 10.1038/s41586-024-07991-z from Falush
HEL_CA4150AA_AS	NO	NO	hpAfrica1	YES	0.91	1	Entero	-14.235	-51.9253	Brazil	South_America	Human	H. pylori	Ubiquitous	Human	Tourrette et al., 2024, 10.1038/s41586-024-07991-z from Falush
HEL_CA4188AA_AS	NO	NO	hpAfrica1	YES	0.9097	1	Entero	-0.228021	15.8277	Congo	Africa	Human	H. pylori	Ubiquitous	Human	Tourrette et al., 2024, 10.1038/s41586-024-07991-z from Falush
HEL_CA5636AA_AS	NO	NO	hpAfrica1	YES	0.9097	1	Entero	38.7946	-106.535	United_States	North_America	Human	H. pylori	Ubiquitous	Human	Tourrette et al., 2024, 10.1038/s41586-024-07991-z from Falush
HEL_CA4553AA_AS	NO	NO	hpAfrica1	YES	0.9096	1	Entero	15.2	-86.2419	Honduras	North_America	Human	H. pylori	Ubiquitous	Human	Tourrette et al., 2024, 10.1038/s41586-024-07991-z from Falush
HEL_CA5640AA_AS	NO	NO	hpAfrica1	YES	0.9092	1	Entero	38.7946	-106.535	United_States	North_America	Human	H. pylori	Ubiquitous	Human	Tourrette et al., 2024, 10.1038/s41586-024-07991-z from Falush
HEL_CA4134AA_AS	NO	NO	hpAfrica1	YES	0.909	1	Entero	-14.235	-51.9253	Brazil	South_America	Human	H. pylori	Ubiquitous	Human	Tourrette et al., 2024, 10.1038/s41586-024-07991-z from Falush
HEL_CA5625AA_AS	NO	NO	hpAfrica1	YES	0.9088	1	Entero	38.7946	-106.535	United_States	North_America	Human	H. pylori	Ubiquitous	Human	Tourrette et al., 2024, 10.1038/s41586-024-07991-z from Falush
HEL_CA5612AA_AS	NO	NO	hpAfrica1	YES	0.9087	1	Entero	38.7946	-106.535	United_States	North_America	Human	H. pylori	Ubiquitous	Human	Tourrette et al., 2024, 10.1038/s41586-024-07991-z from Falush
HEL_CA4325AA_AS	NO	NO	hpAfrica1	YES	0.9082	1	Entero	9.74892	-83.7534	Costa_Rica	North_America	Human	H. pylori	Ubiquitous	Human	Tourrette et al., 2024, 10.1038/s41586-024-07991-z from Falush
HEL_CA4535AA_AS	NO	NO	hpAfrica1	YES	0.9082	1	Entero	15.2	-86.2419	Honduras	North_America	Human	H. pylori	Ubiquitous	Human	Tourrette et al., 2024, 10.1038/s41586-024-07991-z from Falush
HEL_CA4232AA_AS	NO	NO	hpAfrica1	YES	0.9081	1	Entero	4.57087	-74.2973	Colombia	South_America	Human	H. pylori	Ubiquitous	Human	Tourrette et al., 2024, 10.1038/s41586-024-07991-z from Falush
HEL_CA5603AA_AS	NO	NO	hpAfrica1	YES	0.908	1	Entero	38.7946	-106.535	United_States	North_America	Human	H. pylori	Ubiquitous	Human	Tourrette et al., 2024, 10.1038/s41586-024-07991-z from Falush
HEL_CA4191AA_AS	NO	NO	hpAfrica1	YES	0.9079	1	Entero	-0.228021	15.8277	Congo	Africa	Human	H. pylori	Ubiquitous	Human	Tourrette et al., 2024, 10.1038/s41586-024-07991-z from Falush
HEL_CA4317AA_AS	NO	NO	hpAfrica1	YES	0.9079	1	Entero	9.74892	-83.7534	Costa_Rica	North_America	Human	H. pylori	Ubiquitous	Human	Tourrette et al., 2024, 10.1038/s41586-024-07991-z from Falush
HEL_CA5532AA_AS	NO	NO	hpAfrica1	YES	0.9079	1	Entero	-30.5595	22.9375	South_Africa	Africa	Human	H. pylori	Ubiquitous	Human	Tourrette et al., 2024, 10.1038/s41586-024-07991-z from Falush
HEL_CA5591AA_AS	NO	NO	hpAfrica1	YES	0.9077	1	Entero	38.7946	-106.535	United_States	North_America	Human	H. pylori	Ubiquitous	Human	Tourrette et al., 2024, 10.1038/s41586-024-07991-z from Falush
HEL_CA5789AA_AS	NO	NO	hpAfrica1	YES	0.9077	1	Entero	38.7946	-106.535	United_States	North_America	Human	H. pylori	Ubiquitous	Human	Tourrette et al., 2024, 10.1038/s41586-024-07991-z from Falush
HEL_CA4209AA_AS	NO	NO	hpAfrica1	YES	0.9075	1	Entero	-0.228021	15.8277	Congo	Africa	Human	H. pylori	Ubiquitous	Human	Tourrette et al., 2024, 10.1038/s41586-024-07991-z from Falush
HEL_CA5631AA_AS	NO	NO	hpAfrica1	YES	0.9067	1	Entero	38.7946	-106.535	United_States	North_America	Human	H. pylori	Ubiquitous	Human	Tourrette et al., 2024, 10.1038/s41586-024-07991-z from Falush
HEL_CA5644AA_AS	NO	NO	hpAfrica1	YES	0.9065	1	Entero	38.7946	-106.535	United_States	North_America	Human	H. pylori	Ubiquitous	Human	Tourrette et al., 2024, 10.1038/s41586-024-07991-z from Falush
HEL_CA4161AA_AS	NO	NO	hpAfrica1	YES	0.9059	1	Entero	18.7357	-70.1627	Dominican_Republic	South_America	Human	H. pylori	Ubiquitous	Human	Tourrette et al., 2024, 10.1038/s41586-024-07991-z from Falush
HEL_CA4493AA_AS	NO	NO	hpAfrica1	YES	0.9059	1	Entero	7.94653	-1.02319	Ghana	Africa	Human	H. pylori	Ubiquitous	Human	Tourrette et al., 2024, 10.1038/s41586-024-07991-z from Falush
HEL_CA5630AA_AS	NO	NO	hpAfrica1	YES	0.9053	1	Entero	38.7946	-106.535	United_States	North_America	Human	H. pylori	Ubiquitous	Human	Tourrette et al., 2024, 10.1038/s41586-024-07991-z from Falush
HEL_CA5589AA_AS	NO	NO	hpAfrica1	YES	0.9051	1	Entero	38.7946	-106.535	United_States	North_America	Human	H. pylori	Ubiquitous	Human	Tourrette et al., 2024, 10.1038/s41586-024-07991-z from Falush
HEL_BA3543AA_AS	NO	NO	hpAfrica1	YES	0.9049	1	Entero	23.6345	-102.553	Mexico	North_America	Human	H. pylori	Ubiquitous	Human	Camorlinga-Ponce et al., 2021, 10.3389/fcimb.2020.539115
HEL_CA4133AA_AS	NO	NO	hpAfrica1	YES	0.9049	1	Entero	-14.235	-51.9253	Brazil	South_America	Human	H. pylori	Ubiquitous	Human	Tourrette et al., 2024, 10.1038/s41586-024-07991-z from Falush
HEL_CA4204AA_AS	NO	NO	hpAfrica1	YES	0.9049	1	Entero	-33.724	-71.015	Chile	South_America	Human	H. pylori	Ubiquitous	Human	Tourrette et al., 2024, 10.1038/s41586-024-07991-z from Falush
HEL_CA4169AA_AS	NO	NO	hpAfrica1	YES	0.9048	1	Entero	18.7357	-70.1627	Dominican_Republic	South_America	Human	H. pylori	Ubiquitous	Human	Tourrette et al., 2024, 10.1038/s41586-024-07991-z from Falush
HEL_CA4865AA_AS	NO	NO	hpAfrica1	YES	0.9047	1	Entero	-9.18997	-75.0152	Peru	South_America	Human	H. pylori	Ubiquitous	Human	Tourrette et al., 2024, 10.1038/s41586-024-07991-z from Falush
HEL_CA4122AA_AS	NO	NO	hpAfrica1	YES	0.9039	1	Entero	-14.235	-51.9253	Brazil	South_America	Human	H. pylori	Ubiquitous	Human	Tourrette et al., 2024, 10.1038/s41586-024-07991-z from Falush
HEL_CA4194AA_AS	NO	NO	hpAfrica1	YES	0.9031	1	Entero	-0.228021	15.8277	Congo	Africa	Human	H. pylori	Ubiquitous	Human	Tourrette et al., 2024, 10.1038/s41586-024-07991-z from Falush
HEL_CA4187AA_AS	NO	NO	hpAfrica1	YES	0.9029	1	Entero	-0.228021	15.8277	Congo	Africa	Human	H. pylori	Ubiquitous	Human	Tourrette et al., 2024, 10.1038/s41586-024-07991-z from Falush
HEL_CA4483AA_AS	NO	NO	hpAfrica1	YES	0.9028	1	Entero	13.4432	-15.3101	Gambia	Africa	Human	H. pylori	Ubiquitous	Human	Tourrette et al., 2024, 10.1038/s41586-024-07991-z from Falush
HEL_CA4532AA_AS	NO	NO	hpAfrica1	YES	0.9009	1	Entero	15.2	-86.2419	Honduras	North_America	Human	H. pylori	Ubiquitous	Human	Tourrette et al., 2024, 10.1038/s41586-024-07991-z from Falush
HEL_CA4901AA_AS	NO	NO	hpAfrica1	YES	0.9	1	Entero	39.3999	-8.22445	Portugal	Europe	Human	H. pylori	Ubiquitous	Human	Tourrette et al., 2024, 10.1038/s41586-024-07991-z from Falush
HEL_BA3532AA_AS	NO	NO	hpAfrica1	YES	0.8995	1	Entero	5	-72	Colombia	South_America	Human	H. pylori	Ubiquitous	Human	Group of Cytogenetics, Phylogeny and Population Evolution, University of Tolima
HEL_CA5600AA_AS	NO	NO	hpAfrica1	YES	0.8994	1	Entero	38.7946	-106.535	United_States	North_America	Human	H. pylori	Ubiquitous	Human	Tourrette et al., 2024, 10.1038/s41586-024-07991-z from Falush
HEL_CA5624AA_AS	NO	NO	hpAfrica1	YES	0.898	1	Entero	38.7946	-106.535	United_States	North_America	Human	H. pylori	Ubiquitous	Human	Tourrette et al., 2024, 10.1038/s41586-024-07991-z from Falush
HEL_CA4132AA_AS	NO	NO	hpAfrica1	YES	0.8979	1	Entero	-14.235	-51.9253	Brazil	South_America	Human	H. pylori	Ubiquitous	Human	Tourrette et al., 2024, 10.1038/s41586-024-07991-z from Falush
HEL_CA4931AA_AS	NO	NO	hpAfrica1	YES	0.8973	1	Entero	18.2208	-66.5901	Puerto_Rico	North_America	Human	H. pylori	Ubiquitous	Human	Tourrette et al., 2024, 10.1038/s41586-024-07991-z from Falush
HEL_CA4230AA_AS	NO	NO	hpAfrica1	YES	0.897	1	Entero	-0.228021	15.8277	Congo	Africa	Human	H. pylori	Ubiquitous	Human	Tourrette et al., 2024, 10.1038/s41586-024-07991-z from Falush
HEL_CA5490AA_AS	NO	NO	hpAfrica1	YES	0.8929	1	Entero	-30.5595	22.9375	South_Africa	Africa	Human	H. pylori	Ubiquitous	Human	Tourrette et al., 2024, 10.1038/s41586-024-07991-z from Falush
HEL_CA4337AA_AS	NO	NO	hpAfrica1	YES	0.8872	1	Entero	18.7357	-70.1627	Dominican_Republic	South_America	Human	H. pylori	Ubiquitous	Human	Tourrette et al., 2024, 10.1038/s41586-024-07991-z from Falush
HEL_CA5628AA_AS	NO	NO	hpAfrica1	YES	0.8818	1	Entero	38.7946	-106.535	United_States	North_America	Human	H. pylori	Ubiquitous	Human	Tourrette et al., 2024, 10.1038/s41586-024-07991-z from Falush
GCA_017821655.1	NO	NO	hpAfrica1	YES	0.9166	1	NCBI	4.57087	-74.2973	Colombia	South_America	Human	H. pylori	Ubiquitous	Human	Mannion et al., 2021, 10.1128/JCM.03203-20
GCA_016748175.1	NO	NO	hpAfrica1	YES	0.9164	1	NCBI	-9.18997	-75.0152	Peru	South_America	Human	H. pylori	Ubiquitous	Human	Gutierrez-Escobar et al., 2020, 10.3389/fmicb.2020.601839
GCA_017821275.1	NO	NO	hpAfrica1	YES	0.9146	1	NCBI	4.57087	-74.2973	Colombia	South_America	Human	H. pylori	Ubiquitous	Human	Mannion et al., 2021, 10.1128/JCM.03203-20
GCA_017821635.1	NO	NO	hpAfrica1	YES	0.9131	1	NCBI	4.57087	-74.2973	Colombia	South_America	Human	H. pylori	Ubiquitous	Human	Mannion et al., 2021, 10.1128/JCM.03203-20
GCA_017821595.1	NO	NO	hpAfrica1	YES	0.9114	1	NCBI	4.57087	-74.2973	Colombia	South_America	Human	H. pylori	Ubiquitous	Human	Mannion et al., 2021, 10.1128/JCM.03203-20
GCA_017821475.1	NO	NO	hpAfrica1	YES	0.9109	1	NCBI	4.57087	-74.2973	Colombia	South_America	Human	H. pylori	Ubiquitous	Human	Mannion et al., 2021, 10.1128/JCM.03203-20
GCA_017821615.1	NO	NO	hpAfrica1	YES	0.9072	1	NCBI	4.57087	-74.2973	Colombia	South_America	Human	H. pylori	Ubiquitous	Human	Mannion et al., 2021, 10.1128/JCM.03203-20
HEL_BA3550AA_AS	NO	NO	hpAfrica1	YES	0.9103	2	Entero	23.6345	-102.553	Mexico	North_America	Human	H. pylori	Ubiquitous	Human	Camorlinga-Ponce et al., 2021, 10.3389/fcimb.2020.539115
GCA_017821535.1	NO	NO	hpAfrica1	YES	0.9134	2	NCBI	4.57087	-74.2973	Colombia	South_America	Human	H. pylori	Ubiquitous	Human	Mannion et al., 2021, 10.1128/JCM.03203-20
GCA_017821355.1	NO	NO	hpAfrica1	YES	0.9152	3	NCBI	4.57087	-74.2973	Colombia	South_America	Human	H. pylori	Ubiquitous	Human	Mannion et al., 2021, 10.1128/JCM.03203-20
GCA_013177275.1	NO	NO	hpAfrica1	YES	0.9151	3	NCBI	61.524	105.319	Russia	North_Asia	Human	H. pylori	Ubiquitous	Human	Tourrette et al., 2024, 10.1038/s41586-024-07991-z from NCBI
HEL_BA5493AA_AS	NO	NO	hpAfrica1	YES	0.9065	5	Entero	38.7946	-106.535	United_States	North_America	Human	H. pylori	Ubiquitous	Human	Blanchard et al., 2013, 10.1111/2049-632X.12045
HEL_BA8101AA_AS	NO	NO	hpAfrica1	YES	0.9209	6	Entero	38.7946	-106.535	United_States	North_America	Human	H. pylori	Ubiquitous	Human	Blanchard et al., 2013, 10.1111/2049-632X.12045
HEL_BA5542AA_AS	NO	NO	hpAfrica1	YES	0.913	6	Entero	38.7946	-106.535	United_States	North_America	Human	H. pylori	Ubiquitous	Human	Blanchard et al., 2013, 10.1111/2049-632X.12045
HEL_BA8095AA_AS	NO	NO	hpAfrica1	YES	0.8916	6	Entero	38.7946	-106.535	United_States	North_America	Human	H. pylori	Ubiquitous	Human	Blanchard et al., 2013, 10.1111/2049-632X.12045
GCA_008681415.1	NO	NO	hpAfrica1	YES	0.9102	6	NCBI	23.6345	-102.553	Mexico	North_America	Human	H. pylori	Ubiquitous	Human	Tourrette et al., 2024, 10.1038/s41586-024-07991-z from NCBI
HEL_BA8168AA_AS	NO	NO	hpAfrica1	YES	0.9116	7	Entero	38.7946	-106.535	United_States	North_America	Human	H. pylori	Ubiquitous	Human	Blanchard et al., 2013, 10.1111/2049-632X.12045
HEL_BA8160AA_AS	NO	NO	hpAfrica1	YES	0.9112	7	Entero	38.7946	-106.535	United_States	North_America	Human	H. pylori	Ubiquitous	Human	Blanchard et al., 2013, 10.1111/2049-632X.12045
HEL_BA8105AA_AS	NO	NO	hpAfrica1	YES	0.9093	7	Entero	38.7946	-106.535	United_States	North_America	Human	H. pylori	Ubiquitous	Human	Blanchard et al., 2013, 10.1111/2049-632X.12045
HEL_CA5505AA_AS	NO	NO	hpAfrica1	YES	0.8938	7	Entero	38.7946	-106.535	United_States	North_America	Human	H. pylori	Ubiquitous	Human	Tourrette et al., 2024, 10.1038/s41586-024-07991-z from Falush
HEL_BA8109AA_AS	NO	NO	hpAfrica1	YES	0.9235	8	Entero	38.7946	-106.535	United_States	North_America	Human	H. pylori	Ubiquitous	Human	Blanchard et al., 2013, 10.1111/2049-632X.12045
HEL_CA5494AA_AS	NO	NO	hpAfrica1	YES	0.9202	8	Entero	38.7946	-106.535	United_States	North_America	Human	H. pylori	Ubiquitous	Human	Tourrette et al., 2024, 10.1038/s41586-024-07991-z from Falush
HEL_BA5500AA_AS	NO	NO	hpAfrica1	YES	0.9062	8	Entero	41.4994	-81.6956	United_States	North_America	Rodent	H. pylori	Ubiquitous	Rodent	Blanchard et al., 2013, 10.1111/2049-632X.12045
HEL_BA5492AA_AS	NO	NO	hpAfrica1	YES	0.8996	8	Entero	38.7946	-106.535	United_States	North_America	Human	H. pylori	Ubiquitous	Human	Blanchard et al., 2013, 10.1111/2049-632X.12045
HEL_BA8158AA_AS	NO	NO	hpAfrica1	YES	0.887	8	Entero	38.7946	-106.535	United_States	North_America	Human	H. pylori	Ubiquitous	Human	Blanchard et al., 2013, 10.1111/2049-632X.12045
HEL_BA5534AA_AS	NO	NO	hpAfrica1	YES	0.9152	9	Entero	38.7946	-106.535	United_States	North_America	Human	H. pylori	Ubiquitous	Human	Blanchard et al., 2013, 10.1111/2049-632X.12045
HEL_BA5495AA_AS	NO	NO	hpAfrica1	YES	0.9144	9	Entero	38.7946	-106.535	United_States	North_America	Human	H. pylori	Ubiquitous	Human	Blanchard et al., 2013, 10.1111/2049-632X.12045
HEL_BA8164AA_AS	NO	NO	hpAfrica1	YES	0.9123	9	Entero	38.7946	-106.535	United_States	North_America	Human	H. pylori	Ubiquitous	Human	Blanchard et al., 2013, 10.1111/2049-632X.12045
HEL_BA5488AA_AS	NO	NO	hpAfrica1	YES	0.9115	9	Entero	38.7946	-106.535	United_States	North_America	Human	H. pylori	Ubiquitous	Human	Blanchard et al., 2013, 10.1111/2049-632X.12045
HEL_CA5508AA_AS	NO	NO	hpAfrica1	YES	0.9208	10	Entero	38.7946	-106.535	United_States	North_America	Human	H. pylori	Ubiquitous	Human	Tourrette et al., 2024, 10.1038/s41586-024-07991-z from Falush
HEL_BA8180AA_AS	NO	NO	hpAfrica1	YES	0.913	10	Entero	38.7946	-106.535	United_States	North_America	Human	H. pylori	Ubiquitous	Human	Blanchard et al., 2013, 10.1111/2049-632X.12045
HEL_BA5477AA_AS	NO	NO	hpAfrica1	YES	0.9042	10	Entero	38.7946	-106.535	United_States	North_America	Human	H. pylori	Ubiquitous	Human	Blanchard et al., 2013, 10.1111/2049-632X.12045
HEL_BA8163AA_AS	NO	NO	hpAfrica1	YES	0.901	10	Entero	38.7946	-106.535	United_States	North_America	Human	H. pylori	Ubiquitous	Human	Blanchard et al., 2013, 10.1111/2049-632X.12045
HEL_BA5552AA_AS	NO	NO	hpAfrica1	YES	0.9102	11	Entero	38.7946	-106.535	United_States	North_America	Human	H. pylori	Ubiquitous	Human	Blanchard et al., 2013, 10.1111/2049-632X.12045
HEL_BA8174AA_AS	NO	NO	hpAfrica1	YES	0.9093	11	Entero	38.7946	-106.535	United_States	North_America	Human	H. pylori	Ubiquitous	Human	Blanchard et al., 2013, 10.1111/2049-632X.12045
HEL_BA5516AA_AS	NO	NO	hpAfrica1	YES	0.9073	11	Entero	38.7946	-106.535	United_States	North_America	Human	H. pylori	Ubiquitous	Human	Blanchard et al., 2013, 10.1111/2049-632X.12045
HEL_BA5459AA_AS	NO	NO	hpAfrica1	YES	0.9071	11	Entero	56.1304	-106.347	Canada	North_America	Human	H. pylori	Ubiquitous	Human	Institute for Genome Sciences University of MD School of Medicine
HEL_BA5527AA_AS	NO	NO	hpAfrica1	YES	0.8979	11	Entero	56.1304	-106.347	Canada	North_America	Human	H. pylori	Ubiquitous	Human	Blanchard et al., 2013, 10.1111/2049-632X.12045
HEL_BA8106AA_AS	NO	NO	hpAfrica1	YES	0.894	11	Entero	38.7946	-106.535	United_States	North_America	Human	H. pylori	Ubiquitous	Human	Blanchard et al., 2013, 10.1111/2049-632X.12045
HEL_BA5554AA_AS	NO	NO	hpAfrica1	YES	0.9164	12	Entero	38.7946	-106.535	United_States	North_America	Human	H. pylori	Ubiquitous	Human	Blanchard et al., 2013, 10.1111/2049-632X.12045
HEL_BA5487AA_AS	NO	NO	hpAfrica1	YES	0.9098	12	Entero	38.7946	-106.535	United_States	North_America	Human	H. pylori	Ubiquitous	Human	Blanchard et al., 2013, 10.1111/2049-632X.12045
GCA_008681455.1	NO	NO	hpAfrica1	YES	0.9089	13	NCBI	23.6345	-102.553	Mexico	North_America	Human	H. pylori	Ubiquitous	Human	Tourrette et al., 2024, 10.1038/s41586-024-07991-z from NCBI
GCA_008681485.1	NO	NO	hpAfrica1	YES	0.908	15	NCBI	23.6345	-102.553	Mexico	North_America	Human	H. pylori	Ubiquitous	Human	Tourrette et al., 2024, 10.1038/s41586-024-07991-z from NCBI
HEL_BA5556AA_AS	NO	NO	hpAfrica1	YES	0.9195	16	Entero	38.7946	-106.535	United_States	North_America	Human	H. pylori	Ubiquitous	Human	Blanchard et al., 2013, 10.1111/2049-632X.12045
HEL_BA8175AA_AS	NO	NO	hpAfrica1	YES	0.9137	16	Entero	38.7946	-106.535	United_States	North_America	Human	H. pylori	Ubiquitous	Human	Blanchard et al., 2013, 10.1111/2049-632X.12045
HEL_AA9177AA_AS	NO	NO	hpAfrica1	YES	0.9141	17	Entero	12.1506	-86.2681	Nicaragua	North_America	Human	H. pylori	Ubiquitous	Human	Thorell et al., 2016, 10.1186/s12862-016-0619-y
HEL_AA8666AA_AS	NO	NO	hpAfrica1	YES	0.8932	17	Entero	12.1494	-86.311	Nicaragua	North_America	Human	H. pylori	Ubiquitous	Human	kaisa.thorell@gmail.com
GCA_008681225.1	NO	NO	hpAfrica1	YES	0.8784	18	NCBI	23.6345	-102.553	Mexico	North_America	Human	H. pylori	Ubiquitous	Human	Tourrette et al., 2024, 10.1038/s41586-024-07991-z from NCBI
HEL_BA5558AA_AS	NO	NO	hpAfrica1	YES	0.9238	19	Entero	38.7946	-106.535	United_States	North_America	Human	H. pylori	Ubiquitous	Human	Blanchard et al., 2013, 10.1111/2049-632X.12045
GCA_014498785.1	NO	NO	hpAfrica1	YES	0.9152	20	NCBI	-14.235	-51.9253	Brazil	South_America	Human	H. pylori	Ubiquitous	Human	Muñoz-Ramirez et al., 2020, 10.1038/s41396-020-00758-0
HEL_BA5546AA_AS	NO	NO	hpAfrica1	YES	0.9144	21	Entero	38.7946	-106.535	United_States	North_America	Human	H. pylori	Ubiquitous	Human	Blanchard et al., 2013, 10.1111/2049-632X.12045
HEL_BA9372AA_AS	NO	NO	hpAfrica1	YES	0.8986	23	Entero	-33.9	18.49	South_Africa	Africa	Human	H. pylori	Ubiquitous	Human	Tourrette et al., 2024, 10.1038/s41586-024-07991-z
HEL_CA6560AA_AS	NO	NO	hpAfrica1	YES	0.8973	23	Entero	6.42375	-66.5897	Venezuela	South_America	Human	H. pylori	Ubiquitous	Human	Tourrette et al., 2024, 10.1038/s41586-024-07991-z from Falush
GCA_008681475.1	NO	NO	hpAfrica1	YES	0.9029	23	NCBI	23.6345	-102.553	Mexico	North_America	Human	H. pylori	Ubiquitous	Human	Tourrette et al., 2024, 10.1038/s41586-024-07991-z from NCBI
HEL_AA0431AA_AS	NO	NO	hpAfrica1	YES	0.9083	24	Entero	12.1506	-86.2681	Nicaragua	North_America	Human	H. pylori	Ubiquitous	Human	Thorell et al., 2016, 10.1186/s12862-016-0619-y
GCA_014498745.1	NO	NO	hpAfrica1	YES	0.9017	24	NCBI	-14.235	-51.9253	Brazil	South_America	Human	H. pylori	Ubiquitous	Human	Muñoz-Ramirez et al., 2020, 10.1038/s41396-020-00758-0
GCA_011140425.1	NO	NO	hpAfrica1	YES	0.9103	25	NCBI	23.6345	-102.553	Mexico	North_America	Human	H. pylori	Ubiquitous	Human	Camorlinga-Ponce et al., 2021, 10.3389/fcimb.2020.539115
HEL_BA9399AA_AS	NO	NO	hpAfrica1	YES	0.8994	26	Entero	46.2276	2.21375	France	Europe	Human	H. pylori	Ubiquitous	Human	Tourrette et al., 2024, 10.1038/s41586-024-07991-z
GCA_014497655.1	NO	NO	hpAfrica1	YES	0.8966	26	NCBI	15.2	-86.2419	Honduras	North_America	Human	H. pylori	Ubiquitous	Human	Muñoz-Ramirez et al., 2020, 10.1038/s41396-020-00758-0
HEL_AA8698AA_AS	NO	NO	hpAfrica1	YES	0.9204	27	Entero	12.1494	-86.311	Nicaragua	North_America	Human	H. pylori	Ubiquitous	Human	kaisa.thorell@gmail.com
HEL_BA9064AA_AS	NO	NO	hpAfrica1	YES	0.9075	27	Entero	-31.6	115.5	Australia	Oceania	Human	H. pylori	Ubiquitous	Human	Tourrette et al., 2024, 10.1038/s41586-024-07991-z
GCA_014496805.1	NO	NO	hpAfrica1	YES	0.9001	27	NCBI	23.6345	-102.553	Mexico	North_America	Human	H. pylori	Ubiquitous	Human	Muñoz-Ramirez et al., 2020, 10.1038/s41396-020-00758-0
HEL_AA8717AA_AS	NO	NO	hpAfrica1	YES	0.9057	28	Entero	12.1494	-86.311	Nicaragua	North_America	Human	H. pylori	Ubiquitous	Human	kaisa.thorell@gmail.com
HEL_AA6665AA_AS	NO	NO	hpAfrica1	YES	0.8908	28	Entero	9.74892	-83.7534	Costa_Rica	North_America	Human	H. pylori	Ubiquitous	Human	Tourrette et al., 2024, 10.1038/s41586-024-07991-z
GCA_014497415.1	NO	NO	hpAfrica1	YES	0.9175	28	NCBI	15.2	-86.2419	Honduras	North_America	Human	H. pylori	Ubiquitous	Human	Muñoz-Ramirez et al., 2020, 10.1038/s41396-020-00758-0
GCA_014498755.1	NO	NO	hpAfrica1	YES	0.8981	28	NCBI	-14.235	-51.9253	Brazil	South_America	Human	H. pylori	Ubiquitous	Human	Muñoz-Ramirez et al., 2020, 10.1038/s41396-020-00758-0
HEL_AA0121AA_AS	NO	NO	hpAfrica1	YES	0.9123	29	Entero	12.1506	-86.2681	Nicaragua	North_America	Human	H. pylori	Ubiquitous	Human	Thorell et al., 2016, 10.1186/s12862-016-0619-y
HEL_BA4884AA_AS	NO	NO	hpAfrica1	YES	0.9074	29	Entero	-25.2744	133.775	Australia	Oceania	Human	H. pylori	Ubiquitous	Human	Chua et al., 2019, 10.1093/gastro/goy048
HEL_BA4947AA_AS	NO	NO	hpAfrica1	YES	0.9053	29	Entero	-25.2744	133.775	Australia	Oceania	Human	H. pylori	Ubiquitous	Human	Chua et al., 2019, 10.1093/gastro/goy048
HEL_BA4976AA_AS	NO	NO	hpAfrica1	YES	0.9031	29	Entero	-25.2744	133.775	Australia	Oceania	Human	H. pylori	Ubiquitous	Human	Chua et al., 2019, 10.1093/gastro/goy048
HEL_BA9331AA_AS	NO	NO	hpAfrica1	YES	0.8734	29	Entero	-23.36	120.78	Australia	Oceania	Human	H. pylori	Ubiquitous	Human	Tourrette et al., 2024, 10.1038/s41586-024-07991-z
GCA_015904375.1	NO	NO	hpAfrica1	YES	0.9004	29	NCBI	23.6345	-102.553	Mexico	North_America	Human	H. pylori	Ubiquitous	Human	Tourrette et al., 2024, 10.1038/s41586-024-07991-z from NCBI
GCA_014498855.1	NO	NO	hpAfrica1	YES	0.8944	29	NCBI	-14.235	-51.9253	Brazil	South_America	Human	H. pylori	Ubiquitous	Human	Muñoz-Ramirez et al., 2020, 10.1038/s41396-020-00758-0
GCA_014496105.1	NO	NO	hpAfrica1	YES	0.8925	29	NCBI	39.3999	-8.22445	Portugal	Europe	Human	H. pylori	Ubiquitous	Human	Muñoz-Ramirez et al., 2020, 10.1038/s41396-020-00758-0
HEL_AA9180AA_AS	NO	NO	hpAfrica1	YES	0.9087	30	Entero	12.1506	-86.2681	Nicaragua	North_America	Human	H. pylori	Ubiquitous	Human	Thorell et al., 2016, 10.1186/s12862-016-0619-y
HEL_AA8675AA_AS	NO	NO	hpAfrica1	YES	0.8988	30	Entero	12.1494	-86.311	Nicaragua	North_America	Human	H. pylori	Ubiquitous	Human	kaisa.thorell@gmail.com
GCA_011141115.1	NO	NO	hpAfrica1	YES	0.8984	30	NCBI	23.6345	-102.553	Mexico	North_America	Human	H. pylori	Ubiquitous	Human	Camorlinga-Ponce et al., 2021, 10.3389/fcimb.2020.539115
GCA_014497035.1	NO	NO	hpAfrica1	YES	0.8924	30	NCBI	15.2	-86.2419	Honduras	North_America	Human	H. pylori	Ubiquitous	Human	Muñoz-Ramirez et al., 2020, 10.1038/s41396-020-00758-0
HEL_AA0157AA_AS	NO	NO	hpAfrica1	YES	0.9076	31	Entero	12.1506	-86.2681	Nicaragua	North_America	Human	H. pylori	Ubiquitous	Human	Thorell et al., 2016, 10.1186/s12862-016-0619-y
HEL_BA5547AA_AS	NO	NO	hpAfrica1	YES	0.907	32	Entero	38.7946	-106.535	United_States	North_America	Human	H. pylori	Ubiquitous	Human	Blanchard et al., 2013, 10.1111/2049-632X.12045
HEL_AA8631AA_AS	NO	NO	hpAfrica1	YES	0.901	32	Entero	12.1494	-86.311	Nicaragua	North_America	Human	H. pylori	Ubiquitous	Human	kaisa.thorell@gmail.com
HEL_BA9078AA_AS	NO	NO	hpAfrica1	YES	0.8995	32	Entero	30.53	-91.15	United_States	North_America	Human	H. pylori	Ubiquitous	Human	Tourrette et al., 2024, 10.1038/s41586-024-07991-z
HEL_AA8718AA_AS	NO	NO	hpAfrica1	YES	0.8988	32	Entero	12.1494	-86.311	Nicaragua	North_America	Human	H. pylori	Ubiquitous	Human	kaisa.thorell@gmail.com
HEL_BA9665AA_AS	NO	NO	hpAfrica1	YES	0.895	32	Entero	-31.6	115.5	Australia	Oceania	Human	H. pylori	Ubiquitous	Human	Tourrette et al., 2024, 10.1038/s41586-024-07991-z
HEL_BA9142AA_AS	NO	NO	hpAfrica1	YES	0.9086	33	Entero	-30.5595	22.9375	South_Africa	Africa	Human	H. pylori	Ubiquitous	Human	Tourrette et al., 2024, 10.1038/s41586-024-07991-z
HEL_BA8835AA_AS	NO	NO	hpAfrica1	YES	0.9049	33	Entero	30.53	-91.15	United_States	North_America	Human	H. pylori	Ubiquitous	Human	Tourrette et al., 2024, 10.1038/s41586-024-07991-z
HEL_AA6776AA_AS	NO	NO	hpAfrica1	YES	0.9019	33	Entero	-14.235	-51.9253	Brazil	South_America	Human	H. pylori	Ubiquitous	Human	Tourrette et al., 2024, 10.1038/s41586-024-07991-z
HEL_BA4108AA_AS	NO	NO	hpAfrica1	YES	0.9017	33	Entero	-25.2744	133.775	Australia	Oceania	Human	H. pylori	Ubiquitous	Human	Chua et al., 2019, 10.1093/gastro/goy048
HEL_BA9174AA_AS	NO	NO	hpAfrica1	YES	0.8924	33	Entero	-33.9	18.49	South_Africa	Africa	Human	H. pylori	Ubiquitous	Human	Tourrette et al., 2024, 10.1038/s41586-024-07991-z
HEL_BA4876AA_AS	NO	NO	hpAfrica1	YES	0.8918	33	Entero	-25.2744	133.775	Australia	Oceania	Human	H. pylori	Ubiquitous	Human	Chua et al., 2019, 10.1093/gastro/goy048
GCA_014498775.1	NO	NO	hpAfrica1	YES	0.9021	33	NCBI	-14.235	-51.9253	Brazil	South_America	Human	H. pylori	Ubiquitous	Human	Muñoz-Ramirez et al., 2020, 10.1038/s41396-020-00758-0
GCA_014496145.1	NO	NO	hpAfrica1	YES	0.8976	33	NCBI	23.6345	-102.553	Mexico	North_America	Human	H. pylori	Ubiquitous	Human	Muñoz-Ramirez et al., 2020, 10.1038/s41396-020-00758-0
HEL_AA0118AA_AS	NO	NO	hpAfrica1	YES	0.9188	34	Entero	12.1506	-86.2681	Nicaragua	North_America	Human	H. pylori	Ubiquitous	Human	Thorell et al., 2016, 10.1186/s12862-016-0619-y
HEL_BA9358AA_AS	NO	NO	hpAfrica1	YES	0.9011	34	Entero	30.53	-91.15	United_States	North_America	Human	H. pylori	Ubiquitous	Human	Tourrette et al., 2024, 10.1038/s41586-024-07991-z
GCA_014497905.1	NO	NO	hpAfrica1	YES	0.9022	34	NCBI	6.42375	-66.5897	Venezuela	South_America	Human	H. pylori	Ubiquitous	Human	Muñoz-Ramirez et al., 2020, 10.1038/s41396-020-00758-0
GCA_014496715.1	NO	NO	hpAfrica1	YES	0.9011	34	NCBI	38.7946	-106.535	United_States	North_America	Human	H. pylori	Ubiquitous	Human	Muñoz-Ramirez et al., 2020, 10.1038/s41396-020-00758-0
GCA_014498645.1	NO	NO	hpAfrica1	YES	0.8805	34	NCBI	-14.235	-51.9253	Brazil	South_America	Human	H. pylori	Ubiquitous	Human	Muñoz-Ramirez et al., 2020, 10.1038/s41396-020-00758-0
HEL_AA9194AA_AS	NO	NO	hpAfrica1	YES	0.9079	35	Entero	12.1506	-86.2681	Nicaragua	North_America	Human	H. pylori	Ubiquitous	Human	Thorell et al., 2016, 10.1186/s12862-016-0619-y
HEL_BA8841AA_AS	NO	NO	hpAfrica1	YES	0.9033	35	Entero	30.53	-91.15	United_States	North_America	Human	H. pylori	Ubiquitous	Human	Tourrette et al., 2024, 10.1038/s41586-024-07991-z
HEL_CA3816AA_AS	NO	NO	hpAfrica1	YES	0.9028	35	Entero	18.7357	-70.1627	Dominican_Republic	South_America	Human	H. pylori	Ubiquitous	Human	Tourrette et al., 2024, 10.1038/s41586-024-07991-z
HEL_BA9527AA_AS	NO	NO	hpAfrica1	YES	0.901	35	Entero	30.53	-91.15	United_States	North_America	Human	H. pylori	Ubiquitous	Human	Tourrette et al., 2024, 10.1038/s41586-024-07991-z
HEL_BA4898AA_AS	NO	NO	hpAfrica1	YES	0.8992	35	Entero	-25.2744	133.775	Australia	Oceania	Human	H. pylori	Ubiquitous	Human	Chua et al., 2019, 10.1093/gastro/goy048
HEL_CA6067AA_AS	NO	NO	hpAfrica1	YES	0.8978	35	Entero	19.4978	-99.1269	Mexico	North_America	Human	H. pylori	Ubiquitous	Human	Tourrette et al., 2024, 10.1038/s41586-024-07991-z from Falush
HEL_BA9599AA_AS	NO	NO	hpAfrica1	YES	0.8696	35	Entero	-23.36	120.78	Australia	Oceania	Human	H. pylori	Ubiquitous	Human	Tourrette et al., 2024, 10.1038/s41586-024-07991-z
GCA_014498905.1	NO	NO	hpAfrica1	YES	0.9062	35	NCBI	-14.235	-51.9253	Brazil	South_America	Human	H. pylori	Ubiquitous	Human	Muñoz-Ramirez et al., 2020, 10.1038/s41396-020-00758-0
HEL_BA9180AA_AS	NO	NO	hpAfrica1	YES	0.9047	36	Entero	61.13	-149.54	United_States	North_America	Human	H. pylori	Ubiquitous	Human	Tourrette et al., 2024, 10.1038/s41586-024-07991-z
HEL_BA9193AA_AS	NO	NO	hpAfrica1	YES	0.8905	36	Entero	46.2276	2.21375	France	Europe	Human	H. pylori	Ubiquitous	Human	Tourrette et al., 2024, 10.1038/s41586-024-07991-z
GCA_014497405.1	NO	NO	hpAfrica1	YES	0.9059	36	NCBI	40.4637	-3.74922	Spain	Europe	Human	H. pylori	Ubiquitous	Human	Muñoz-Ramirez et al., 2020, 10.1038/s41396-020-00758-0
GCA_009740575.1	NO	NO	hpAfrica1	YES	0.8957	36	NCBI	38.7946	-106.535	United_States	North_America	Human	H. pylori	Ubiquitous	Human	Saranathan et al., 2020, 10.1128/JCM.01591-19
HEL_AA8668AA_AS	NO	NO	hpAfrica1	YES	0.9097	37	Entero	12.1494	-86.311	Nicaragua	North_America	Human	H. pylori	Ubiquitous	Human	kaisa.thorell@gmail.com
HEL_AA6578AA_AS	NO	NO	hpAfrica1	YES	0.8982	37	Entero	23.6345	-102.553	Mexico	North_America	Human	H. pylori	Ubiquitous	Human	Muñoz-Ramirez et al., 2020, 10.1038/s41396-020-00758-0
GCA_014497605.1	NO	NO	hpAfrica1	YES	0.9088	37	NCBI	15.2	-86.2419	Honduras	North_America	Human	H. pylori	Ubiquitous	Human	Muñoz-Ramirez et al., 2020, 10.1038/s41396-020-00758-0
GCA_014497455.1	NO	NO	hpAfrica1	YES	0.9032	37	NCBI	15.2	-86.2419	Honduras	North_America	Human	H. pylori	Ubiquitous	Human	Muñoz-Ramirez et al., 2020, 10.1038/s41396-020-00758-0
HEL_AA0427AA_AS	NO	NO	hpAfrica1	YES	0.9118	38	Entero	12.1506	-86.2681	Nicaragua	North_America	Human	H. pylori	Ubiquitous	Human	Thorell et al., 2016, 10.1186/s12862-016-0619-y
HEL_BA4239AA_AS	NO	NO	hpAfrica1	YES	0.8868	38	Entero	-25.2744	133.775	Australia	Oceania	Human	H. pylori	Ubiquitous	Human	Chua et al., 2019, 10.1093/gastro/goy048
HEL_BA9486AA_AS	NO	NO	hpAfrica1	YES	0.8809	38	Entero	61.13	-149.54	United_States	North_America	Human	H. pylori	Ubiquitous	Human	Tourrette et al., 2024, 10.1038/s41586-024-07991-z
GCA_011141015.1	NO	NO	hpAfrica1	YES	0.9216	38	NCBI	23.6345	-102.553	Mexico	North_America	Human	H. pylori	Ubiquitous	Human	Camorlinga-Ponce et al., 2021, 10.3389/fcimb.2020.539115
GCA_011141135.1	NO	NO	hpAfrica1	YES	0.9083	38	NCBI	23.6345	-102.553	Mexico	North_America	Human	H. pylori	Ubiquitous	Human	Camorlinga-Ponce et al., 2021, 10.3389/fcimb.2020.539115
GCA_011141095.1	NO	NO	hpAfrica1	YES	0.9076	38	NCBI	23.6345	-102.553	Mexico	North_America	Human	H. pylori	Ubiquitous	Human	Camorlinga-Ponce et al., 2021, 10.3389/fcimb.2020.539115
HEL_AA0155AA_AS	NO	NO	hpAfrica1	YES	0.9098	39	Entero	12.1506	-86.2681	Nicaragua	North_America	Human	H. pylori	Ubiquitous	Human	Thorell et al., 2016, 10.1186/s12862-016-0619-y
HEL_AA0428AA_AS	NO	NO	hpAfrica1	YES	0.9096	39	Entero	12.1506	-86.2681	Nicaragua	North_America	Human	H. pylori	Ubiquitous	Human	Thorell et al., 2016, 10.1186/s12862-016-0619-y
HEL_BA9689AA_AS	NO	NO	hpAfrica1	YES	0.9084	39	Entero	-30.5595	22.9375	South_Africa	Africa	Human	H. pylori	Ubiquitous	Human	Tourrette et al., 2024, 10.1038/s41586-024-07991-z
HEL_BA4670AA_AS	NO	NO	hpAfrica1	YES	0.8939	39	Entero	-25.2744	133.775	Australia	Oceania	Human	H. pylori	Ubiquitous	Human	Chua et al., 2019, 10.1093/gastro/goy048
HEL_BA9635AA_AS	NO	NO	hpAfrica1	YES	0.8745	39	Entero	-33.9	18.49	South_Africa	Africa	Human	H. pylori	Ubiquitous	Human	Tourrette et al., 2024, 10.1038/s41586-024-07991-z
GCA_014498245.1	NO	NO	hpAfrica1	YES	0.9045	39	NCBI	40.4637	-3.74922	Spain	Europe	Human	H. pylori	Ubiquitous	Human	Muñoz-Ramirez et al., 2020, 10.1038/s41396-020-00758-0
GCA_014496035.1	NO	NO	hpAfrica1	YES	0.8834	39	NCBI	38.7946	-106.535	United_States	North_America	Human	H. pylori	Ubiquitous	Human	Muñoz-Ramirez et al., 2020, 10.1038/s41396-020-00758-0
HEL_AA5313AA_AS	NO	NO	hpAfrica1	YES	0.9038	40	Entero	1.0857	-77.6186	Colombia	South_America	Human	H. pylori	Ubiquitous	Human	Vanderbilt University Medical Center
HEL_AA0156AA_AS	NO	NO	hpAfrica1	YES	0.9033	40	Entero	12.1506	-86.2681	Nicaragua	North_America	Human	H. pylori	Ubiquitous	Human	Thorell et al., 2016, 10.1186/s12862-016-0619-y
HEL_AA5308AA_AS	NO	NO	hpAfrica1	YES	0.8984	40	Entero	1.79	-78.79	Colombia	South_America	Human	H. pylori	Ubiquitous	Human	Vanderbilt University Medical Center
HEL_BA8970AA_AS	NO	NO	hpAfrica1	YES	0.8951	40	Entero	-22.9576	18.4904	Namibia	Africa	Human	H. pylori	Ubiquitous	Human	Tourrette et al., 2024, 10.1038/s41586-024-07991-z
HEL_AA5503AA_AS	NO	NO	hpAfrica1	YES	0.8918	40	Entero	13	-15	Gambia	Africa	Human	H. pylori	Ubiquitous	Human	Human Microbiome Project (HMP)
GCA_014498765.1	NO	NO	hpAfrica1	YES	0.8977	40	NCBI	-14.235	-51.9253	Brazil	South_America	Human	H. pylori	Ubiquitous	Human	Muñoz-Ramirez et al., 2020, 10.1038/s41396-020-00758-0
HEL_CA3837AA_AS	NO	NO	hpAfrica1	YES	0.8964	41	Entero	18.7357	-70.1627	Dominican_Republic	South_America	Human	H. pylori	Ubiquitous	Human	Tourrette et al., 2024, 10.1038/s41586-024-07991-z
HEL_BA8933AA_AS	NO	NO	hpAfrica1	YES	0.8901	41	Entero	56.01	93.04	Russia	North_Asia	Human	H. pylori	Ubiquitous	Human	Tourrette et al., 2024, 10.1038/s41586-024-07991-z
GCA_014497785.1	NO	NO	hpAfrica1	YES	0.9017	41	NCBI	15.2	-86.2419	Honduras	North_America	Human	H. pylori	Ubiquitous	Human	Muñoz-Ramirez et al., 2020, 10.1038/s41396-020-00758-0
GCA_015904525.1	NO	NO	hpAfrica1	YES	0.8996	41	NCBI	23.6345	-102.553	Mexico	North_America	Human	H. pylori	Ubiquitous	Human	Tourrette et al., 2024, 10.1038/s41586-024-07991-z from NCBI
GCA_014496965.1	NO	NO	hpAfrica1	YES	0.897	41	NCBI	23.6345	-102.553	Mexico	North_America	Human	H. pylori	Ubiquitous	Human	Muñoz-Ramirez et al., 2020, 10.1038/s41396-020-00758-0
HEL_BA9645AA_AS	NO	NO	hpAfrica1	YES	0.911	42	Entero	10.25	-66.42	Venezuela	South_America	Human	H. pylori	Ubiquitous	Human	Tourrette et al., 2024, 10.1038/s41586-024-07991-z
HEL_AA8704AA_AS	NO	NO	hpAfrica1	YES	0.9146	42	Entero	12.1494	-86.311	Nicaragua	North_America	Human	H. pylori	Ubiquitous	Human	kaisa.thorell@gmail.com
HEL_AA6734AA_AS	NO	NO	hpAfrica1	YES	0.9043	42	Entero	39.3999	-8.22445	Portugal	Europe	Human	H. pylori	Ubiquitous	Human	Thorpe et al., 2022, 10.1038/s41467-022-34475-3
HEL_BA9432AA_AS	NO	NO	hpAfrica1	YES	0.9041	42	Entero	30.53	-91.15	United_States	North_America	Human	H. pylori	Ubiquitous	Human	Tourrette et al., 2024, 10.1038/s41586-024-07991-z
HEL_AA0158AA_AS	NO	NO	hpAfrica1	YES	0.9038	42	Entero	12.1506	-86.2681	Nicaragua	North_America	Human	H. pylori	Ubiquitous	Human	Gothenburg University
HEL_BA9240AA_AS	NO	NO	hpAfrica1	YES	0.9034	42	Entero	-23.36	120.78	Australia	Oceania	Human	H. pylori	Ubiquitous	Human	Tourrette et al., 2024, 10.1038/s41586-024-07991-z
HEL_AA9174AA_AS	NO	NO	hpAfrica1	YES	0.8983	42	Entero	12.1506	-86.2681	Nicaragua	North_America	Human	H. pylori	Ubiquitous	Human	Thorell et al., 2016, 10.1186/s12862-016-0619-y
HEL_CA3824AA_AS	NO	NO	hpAfrica1	YES	0.8951	42	Entero	18.7357	-70.1627	Dominican_Republic	South_America	Human	H. pylori	Ubiquitous	Human	Tourrette et al., 2024, 10.1038/s41586-024-07991-z
GCA_009740645.1	NO	NO	hpAfrica1	YES	0.9042	42	NCBI	38.7946	-106.535	United_States	North_America	Human	H. pylori	Ubiquitous	Human	Saranathan et al., 2020, 10.1128/JCM.01591-19
GCA_902374915.1	NO	NO	hpAfrica1	YES	0.8795	42	NCBI	46.2276	2.21375	France	Europe	Human	H. pylori	Ubiquitous	Human	Tourrette et al., 2024, 10.1038/s41586-024-07991-z from NCBI
HEL_AA0438AA_AS	NO	NO	hpAfrica1	YES	0.9071	43	Entero	12.1506	-86.2681	Nicaragua	North_America	Human	H. pylori	Ubiquitous	Human	Gothenburg University
HEL_AA4369AA_AS	NO	NO	hpAfrica1	YES	0.8958	43	Entero	39.3999	-8.22445	Portugal	Europe	Human	H. pylori	Ubiquitous	Human	National Institute of Health, Portugal
HEL_BA9224AA_AS	NO	NO	hpAfrica1	YES	0.8926	43	Entero	30.53	-91.15	United_States	North_America	Human	H. pylori	Ubiquitous	Human	Tourrette et al., 2024, 10.1038/s41586-024-07991-z
HEL_BA5010AA_AS	NO	NO	hpAfrica1	YES	0.8876	43	Entero	-25.2744	133.775	Australia	Oceania	Human	H. pylori	Ubiquitous	Human	Chua et al., 2019, 10.1093/gastro/goy048
HEL_AA5493AA_AS	NO	NO	hpAfrica1	YES	0.8795	43	Entero	13	-15	Gambia	Africa	Human	H. pylori	Ubiquitous	Human	Human Microbiome Project (HMP)
HEL_AA5318AA_AS	NO	NO	hpAfrica1	YES	0.9012	44	Entero	1.79	-78.79	Colombia	South_America	Human	H. pylori	Ubiquitous	Human	Vanderbilt University Medical Center
HEL_AA5487AA_AS	NO	NO	hpAfrica1	YES	0.8971	44	Entero	13	-15	Gambia	Africa	Human	H. pylori	Ubiquitous	Human	Human Microbiome Project (HMP)
HEL_BA4155AA_AS	NO	NO	hpAfrica1	YES	0.8769	44	Entero	-25.2744	133.775	Australia	Oceania	Human	H. pylori	Ubiquitous	Human	Chua et al., 2019, 10.1093/gastro/goy048
HEL_BA4227AA_AS	NO	NO	hpAfrica1	YES	0.8963	45	Entero	-25.2744	133.775	Australia	Oceania	Human	H. pylori	Ubiquitous	Human	Chua et al., 2019, 10.1093/gastro/goy048
HEL_AA5519AA_AS	NO	NO	hpAfrica1	YES	0.8891	45	Entero	13	-15	Gambia	Africa	Human	H. pylori	Ubiquitous	Human	Tourrette et al., 2024, 10.1038/s41586-024-07991-z from Entero database
HEL_BA9771AA_AS	NO	NO	hpAfrica1	YES	0.884	45	Entero	-22.9576	18.4904	Namibia	Africa	Human	H. pylori	Ubiquitous	Human	Tourrette et al., 2024, 10.1038/s41586-024-07991-z
HEL_AA5485AA_AS	NO	NO	hpAfrica1	YES	0.8723	45	Entero	13	-15	Gambia	Africa	Human	H. pylori	Ubiquitous	Human	Human Microbiome Project (HMP)
GCA_014496025.1	NO	NO	hpAfrica1	YES	0.9118	45	NCBI	38.7946	-106.535	United_States	North_America	Human	H. pylori	Ubiquitous	Human	Muñoz-Ramirez et al., 2020, 10.1038/s41396-020-00758-0
GCA_015904665.1	NO	NO	hpAfrica1	YES	0.9048	45	NCBI	23.6345	-102.553	Mexico	North_America	Human	H. pylori	Ubiquitous	Human	Tourrette et al., 2024, 10.1038/s41586-024-07991-z from NCBI
GCA_015904465.1	NO	NO	hpAfrica1	YES	0.8975	45	NCBI	23.6345	-102.553	Mexico	North_America	Human	H. pylori	Ubiquitous	Human	Tourrette et al., 2024, 10.1038/s41586-024-07991-z from NCBI
GCA_009741105.1	NO	NO	hpAfrica1	YES	0.8949	45	NCBI	38.7946	-106.535	United_States	North_America	Human	H. pylori	Ubiquitous	Human	Saranathan et al., 2020, 10.1128/JCM.01591-19
HEL_AA9189AA_AS	NO	NO	hpAfrica1	YES	0.9105	46	Entero	12.1506	-86.2681	Nicaragua	North_America	Human	H. pylori	Ubiquitous	Human	Thorell et al., 2016, 10.1186/s12862-016-0619-y
HEL_BA4236AA_AS	NO	NO	hpAfrica1	YES	0.8992	46	Entero	-25.2744	133.775	Australia	Oceania	Human	H. pylori	Ubiquitous	Human	Chua et al., 2019, 10.1093/gastro/goy048
HEL_BA8984AA_AS	NO	NO	hpAfrica1	YES	0.8946	46	Entero	-30.5595	22.9375	South_Africa	Africa	Human	H. pylori	Ubiquitous	Human	Tourrette et al., 2024, 10.1038/s41586-024-07991-z
HEL_CA3848AA_AS	NO	NO	hpAfrica1	YES	0.8924	46	Entero	18.7357	-70.1627	Dominican_Republic	South_America	Human	H. pylori	Ubiquitous	Human	Tourrette et al., 2024, 10.1038/s41586-024-07991-z
GCA_014498005.1	NO	NO	hpAfrica1	YES	0.9049	46	NCBI	38.7946	-106.535	United_States	North_America	Human	H. pylori	Ubiquitous	Human	Muñoz-Ramirez et al., 2020, 10.1038/s41396-020-00758-0
GCA_009741165.1	NO	NO	hpAfrica1	YES	0.8961	46	NCBI	38.7946	-106.535	United_States	North_America	Human	H. pylori	Ubiquitous	Human	Saranathan et al., 2020, 10.1128/JCM.01591-19
HEL_AA5315AA_AS	NO	NO	hpAfrica1	YES	0.9067	47	Entero	1.0857	-77.6186	Colombia	South_America	Human	H. pylori	Ubiquitous	Human	Vanderbilt University Medical Center
HEL_AA5512AA_AS	NO	NO	hpAfrica1	YES	0.9016	47	Entero	13	-15	Gambia	Africa	Human	H. pylori	Ubiquitous	Human	Tourrette et al., 2024, 10.1038/s41586-024-07991-z from Entero database
HEL_AA5518AA_AS	NO	NO	hpAfrica1	YES	0.8976	47	Entero	13	-15	Gambia	Africa	Human	H. pylori	Ubiquitous	Human	Tourrette et al., 2024, 10.1038/s41586-024-07991-z from Entero database
HEL_BA5732AA_AS	NO	NO	hpAfrica1	YES	0.8923	47	Entero	-30.5595	22.9375	South_Africa	Africa	Human	H. pylori	Ubiquitous	Human	European Bioinformatics Institute
HEL_BA4905AA_AS	NO	NO	hpAfrica1	YES	0.8902	47	Entero	-25.2744	133.775	Australia	Oceania	Human	H. pylori	Ubiquitous	Human	Chua et al., 2019, 10.1093/gastro/goy048
HEL_CA3829AA_AS	NO	NO	hpAfrica1	YES	0.9034	48	Entero	18.7357	-70.1627	Dominican_Republic	South_America	Human	H. pylori	Ubiquitous	Human	Tourrette et al., 2024, 10.1038/s41586-024-07991-z
HEL_AA5498AA_AS	NO	NO	hpAfrica1	YES	0.8978	48	Entero	13	-15	Gambia	Africa	Human	H. pylori	Ubiquitous	Human	Human Microbiome Project (HMP)
HEL_BA8965AA_AS	NO	NO	hpAfrica1	YES	0.8973	48	Entero	36.11	-86.68	United_States	North_America	Human	H. pylori	Ubiquitous	Human	Tourrette et al., 2024, 10.1038/s41586-024-07991-z
HEL_BA9817AA_AS	NO	NO	hpAfrica1	YES	0.8928	48	Entero	-23.4	133.5	Australia	Oceania	Human	H. pylori	Ubiquitous	Human	Tourrette et al., 2024, 10.1038/s41586-024-07991-z
GCA_009740785.1	NO	NO	hpAfrica1	YES	0.8992	48	NCBI	38.7946	-106.535	United_States	North_America	Human	H. pylori	Ubiquitous	Human	Saranathan et al., 2020, 10.1128/JCM.01591-19
HEL_BA5197AA_AS	NO	NO	hpAfrica1	YES	0.9036	49	Entero	4.38	-74.05	Colombia	South_America	Human	H. pylori	Ubiquitous	Human	Gutierrez-Escobar et al., 2017, 10.1186/s13099-017-0201-1
HEL_BA9376AA_AS	NO	NO	hpAfrica1	YES	0.9009	49	Entero	-33.9	18.49	South_Africa	Africa	Human	H. pylori	Ubiquitous	Human	Tourrette et al., 2024, 10.1038/s41586-024-07991-z
HEL_AA5494AA_AS	NO	NO	hpAfrica1	YES	0.9002	49	Entero	13	-15	Gambia	Africa	Human	H. pylori	Ubiquitous	Human	Human Microbiome Project (HMP)
HEL_AA0113AA_AS	NO	NO	hpAfrica1	YES	0.8992	49	Entero	12.1506	-86.2681	Nicaragua	North_America	Human	H. pylori	Ubiquitous	Human	Thorell et al., 2016, 10.1186/s12862-016-0619-y
HEL_AA5479AA_AS	NO	NO	hpAfrica1	YES	0.8853	49	Entero	13	-15	Gambia	Africa	Human	H. pylori	Ubiquitous	Human	Human Microbiome Project (HMP)
HEL_BA5707AA_AS	NO	NO	hpAfrica1	YES	0.884	49	Entero	-30.5595	22.9375	South_Africa	Africa	Human	H. pylori	Ubiquitous	Human	European Bioinformatics Institute
HEL_AA5514AA_AS	NO	NO	hpAfrica1	YES	0.8742	49	Entero	13	-15	Gambia	Africa	Human	H. pylori	Ubiquitous	Human	Tourrette et al., 2024, 10.1038/s41586-024-07991-z from Entero database
GCA_014496675.1	NO	NO	hpAfrica1	YES	0.9052	49	NCBI	38.7946	-106.535	United_States	North_America	Human	H. pylori	Ubiquitous	Human	Muñoz-Ramirez et al., 2020, 10.1038/s41396-020-00758-0
GCA_014496495.1	NO	NO	hpAfrica1	YES	0.901	49	NCBI	38.7946	-106.535	United_States	North_America	Human	H. pylori	Ubiquitous	Human	Muñoz-Ramirez et al., 2020, 10.1038/s41396-020-00758-0
HEL_AA6573AA_AS	NO	NO	hpAfrica1	YES	0.9063	50	Entero	23.6345	-102.553	Mexico	North_America	Human	H. pylori	Ubiquitous	Human	Muñoz-Ramirez et al., 2017, 10.3389/fcimb.2017.00050
HEL_BA4163AA_AS	NO	NO	hpAfrica1	YES	0.8995	50	Entero	-25.2744	133.775	Australia	Oceania	Human	H. pylori	Ubiquitous	Human	Chua et al., 2019, 10.1093/gastro/goy048
HEL_BA9173AA_AS	NO	NO	hpAfrica1	YES	0.8992	50	Entero	36.11	-86.68	United_States	North_America	Human	H. pylori	Ubiquitous	Human	Tourrette et al., 2024, 10.1038/s41586-024-07991-z
HEL_AA5484AA_AS	NO	NO	hpAfrica1	YES	0.8976	50	Entero	13	-15	Gambia	Africa	Human	H. pylori	Ubiquitous	Human	Human Microbiome Project (HMP)
GCA_011140435.1	NO	NO	hpAfrica1	YES	0.9046	50	NCBI	23.6345	-102.553	Mexico	North_America	Human	H. pylori	Ubiquitous	Human	Camorlinga-Ponce et al., 2021, 10.3389/fcimb.2020.539115
GCA_009740315.1	NO	NO	hpAfrica1	YES	0.8992	50	NCBI	38.7946	-106.535	United_States	North_America	Human	H. pylori	Ubiquitous	Human	Saranathan et al., 2020, 10.1128/JCM.01591-19
GCA_015904425.1	NO	NO	hpAfrica1	YES	0.8966	50	NCBI	23.6345	-102.553	Mexico	North_America	Human	H. pylori	Ubiquitous	Human	Tourrette et al., 2024, 10.1038/s41586-024-07991-z from NCBI
GCA_009740685.1	NO	NO	hpAfrica1	YES	0.8916	50	NCBI	38.7946	-106.535	United_States	North_America	Human	H. pylori	Ubiquitous	Human	Saranathan et al., 2020, 10.1128/JCM.01591-19
HEL_AA5510AA_AS	NO	NO	hpAfrica1	YES	0.9068	51	Entero	13	-15	Gambia	Africa	Human	H. pylori	Ubiquitous	Human	Tourrette et al., 2024, 10.1038/s41586-024-07991-z from Entero database
HEL_AA5320AA_AS	NO	NO	hpAfrica1	YES	0.9039	51	Entero	1.0857	-77.6186	Colombia	South_America	Human	H. pylori	Ubiquitous	Human	Vanderbilt University Medical Center
HEL_AA5509AA_AS	NO	NO	hpAfrica1	YES	0.8936	51	Entero	13	-15	Gambia	Africa	Human	H. pylori	Ubiquitous	Human	Human Microbiome Project (HMP)
GCA_009740735.1	NO	NO	hpAfrica1	YES	0.9063	51	NCBI	38.7946	-106.535	United_States	North_America	Human	H. pylori	Ubiquitous	Human	Saranathan et al., 2020, 10.1128/JCM.01591-19
GCA_009740925.1	NO	NO	hpAfrica1	YES	0.9035	51	NCBI	38.7946	-106.535	United_States	North_America	Human	H. pylori	Ubiquitous	Human	Saranathan et al., 2020, 10.1128/JCM.01591-19
HEL_CA3736AA_AS	NO	NO	hpAfrica1	YES	0.8918	52	Entero	-0.22802	15.8277	Congo	Africa	Human	H. pylori	Ubiquitous	Human	Tourrette et al., 2024, 10.1038/s41586-024-07991-z
GCA_009740525.1	NO	NO	hpAfrica1	YES	0.897	52	NCBI	38.7946	-106.535	United_States	North_America	Human	H. pylori	Ubiquitous	Human	Saranathan et al., 2020, 10.1128/JCM.01591-19
HEL_AA5317AA_AS	NO	NO	hpAfrica1	YES	0.8946	53	Entero	1.0857	-77.6186	Colombia	South_America	Human	H. pylori	Ubiquitous	Human	Vanderbilt University Medical Center
HEL_BA5203AA_AS	NO	NO	hpAfrica1	YES	0.8996	53	Entero	4.38	-74.05	Colombia	South_America	Human	H. pylori	Ubiquitous	Human	Gutierrez-Escobar et al., 2017, 10.1186/s13099-017-0201-1
HEL_AA5319AA_AS	NO	NO	hpAfrica1	YES	0.8987	53	Entero	1.0857	-77.6186	Colombia	South_America	Human	H. pylori	Ubiquitous	Human	Vanderbilt University Medical Center
HEL_AA5481AA_AS	NO	NO	hpAfrica1	YES	0.8761	53	Entero	13	-15	Gambia	Africa	Human	H. pylori	Ubiquitous	Human	Human Microbiome Project (HMP)
HEL_AA5520AA_AS	NO	NO	hpAfrica1	YES	0.8732	53	Entero	13	-15	Gambia	Africa	Human	H. pylori	Ubiquitous	Human	Tourrette et al., 2024, 10.1038/s41586-024-07991-z from Entero database
GCA_009740325.1	NO	NO	hpAfrica1	YES	0.9095	53	NCBI	38.7946	-106.535	United_States	North_America	Human	H. pylori	Ubiquitous	Human	Saranathan et al., 2020, 10.1128/JCM.01591-19
GCA_009740815.1	NO	NO	hpAfrica1	YES	0.8952	53	NCBI	38.7946	-106.535	United_States	North_America	Human	H. pylori	Ubiquitous	Human	Saranathan et al., 2020, 10.1128/JCM.01591-19
GCA_009740845.1	NO	NO	hpAfrica1	YES	0.8896	53	NCBI	38.7946	-106.535	United_States	North_America	Human	H. pylori	Ubiquitous	Human	Saranathan et al., 2020, 10.1128/JCM.01591-19
HEL_AA5462AA_AS	NO	NO	hpAfrica1	YES	0.9003	54	Entero	13	-15	Gambia	Africa	Human	H. pylori	Ubiquitous	Human	Human Microbiome Project (HMP)
HEL_BA4076AA_AS	NO	NO	hpAfrica1	YES	0.9	54	Entero	41.5573	2.1095	Spain	Europe	Human	H. pylori	Ubiquitous	Human	Facultat de Farmacia i Ciencies de l'Alimentacio; Universitat de Barcelona
HEL_BA5097AA_AS	NO	NO	hpAfrica1	YES	0.8871	54	Entero	46.2276	2.21375	France	Europe	Human	H. pylori	Ubiquitous	Human	Berthenet et al., 2018, 10.1186/s12915-018-0550-3
GCA_009741085.1	NO	NO	hpAfrica1	YES	0.9117	54	NCBI	38.7946	-106.535	United_States	North_America	Human	H. pylori	Ubiquitous	Human	Saranathan et al., 2020, 10.1128/JCM.01591-19
GCA_015905025.1	NO	NO	hpAfrica1	YES	0.9056	54	NCBI	23.6345	-102.553	Mexico	North_America	Human	H. pylori	Ubiquitous	Human	Tourrette et al., 2024, 10.1038/s41586-024-07991-z from NCBI
GCA_015904875.1	NO	NO	hpAfrica1	YES	0.9052	54	NCBI	23.6345	-102.553	Mexico	North_America	Human	H. pylori	Ubiquitous	Human	Tourrette et al., 2024, 10.1038/s41586-024-07991-z from NCBI
HEL_CA3960AA_AS	NO	NO	hpAfrica1	YES	0.9089	55	Entero	46.2276	2.21375	France	Europe	Human	H. pylori	Ubiquitous	Human	Tourrette et al., 2024, 10.1038/s41586-024-07991-z from Falush
HEL_CA3733AA_AS	NO	NO	hpAfrica1	YES	0.9036	55	Entero	-0.22802	15.8277	Congo	Africa	Human	H. pylori	Ubiquitous	Human	Tourrette et al., 2024, 10.1038/s41586-024-07991-z
HEL_CA3851AA_AS	NO	NO	hpAfrica1	YES	0.8984	55	Entero	18.7357	-70.1627	Dominican_Republic	South_America	Human	H. pylori	Ubiquitous	Human	Tourrette et al., 2024, 10.1038/s41586-024-07991-z
HEL_AA8672AA_AS	NO	NO	hpAfrica1	YES	0.8978	55	Entero	12.1494	-86.311	Nicaragua	North_America	Human	H. pylori	Ubiquitous	Human	kaisa.thorell@gmail.com
HEL_BA5692AA_AS	NO	NO	hpAfrica1	YES	0.8865	55	Entero	-30.5595	22.9375	South_Africa	Africa	Human	H. pylori	Ubiquitous	Human	European Bioinformatics Institute
HEL_BA5716AA_AS	NO	NO	hpAfrica1	YES	0.8791	55	Entero	-30.5595	22.9375	South_Africa	Africa	Human	H. pylori	Ubiquitous	Human	Didelot et al., 2013, 10.1073/pnas.1304681110
GCA_011140915.1	NO	NO	hpAfrica1	YES	0.9032	55	NCBI	23.6345	-102.553	Mexico	North_America	Human	H. pylori	Ubiquitous	Human	Camorlinga-Ponce et al., 2021, 10.3389/fcimb.2020.539115
GCA_009740485.1	NO	NO	hpAfrica1	YES	0.8865	55	NCBI	38.7946	-106.535	United_States	North_America	Human	H. pylori	Ubiquitous	Human	Saranathan et al., 2020, 10.1128/JCM.01591-19
HEL_BA4739AA_AS	NO	NO	hpAfrica1	YES	0.9065	56	Entero	47.3667	8.55	Switzerland	Europe	Human	H. pylori	Ubiquitous	Human	University Hospital Basel
HEL_CA3832AA_AS	NO	NO	hpAfrica1	YES	0.8959	56	Entero	18.7357	-70.1627	Dominican_Republic	South_America	Human	H. pylori	Ubiquitous	Human	Tourrette et al., 2024, 10.1038/s41586-024-07991-z
HEL_AA5464AA_AS	NO	NO	hpAfrica1	YES	0.8957	56	Entero	13	-15	Gambia	Africa	Human	H. pylori	Ubiquitous	Human	Human Microbiome Project (HMP)
HEL_AA5492AA_AS	NO	NO	hpAfrica1	YES	0.8954	56	Entero	13	-15	Gambia	Africa	Human	H. pylori	Ubiquitous	Human	Human Microbiome Project (HMP)
HEL_AA0159AA_AS	NO	NO	hpAfrica1	YES	0.9042	57	Entero	12.1506	-86.2681	Nicaragua	North_America	Human	H. pylori	Ubiquitous	Human	Gothenburg University
HEL_CA5964AA_AS	NO	NO	hpAfrica1	YES	0.9032	57	Entero	23.6345	-102.553	Mexico	North_America	Human	H. pylori	Ubiquitous	Human	Tourrette et al., 2024, 10.1038/s41586-024-07991-z from Falush
HEL_CA5806AA_AS	NO	NO	hpAfrica1	YES	0.8944	57	Entero	-0.22802	15.8277	Congo	Africa	Human	H. pylori	Ubiquitous	Human	Tourrette et al., 2024, 10.1038/s41586-024-07991-z
GCA_009740985.1	NO	NO	hpAfrica1	YES	0.8985	57	NCBI	38.7946	-106.535	United_States	North_America	Human	H. pylori	Ubiquitous	Human	Saranathan et al., 2020, 10.1128/JCM.01591-19
GCA_014497515.1	NO	NO	hpAfrica1	YES	0.8964	58	NCBI	56.1304	-106.347	Canada	North_America	Human	H. pylori	Ubiquitous	Human	Muñoz-Ramirez et al., 2020, 10.1038/s41396-020-00758-0
GCA_014496365.1	NO	NO	hpAfrica1	YES	0.9018	58	NCBI	38.7946	-106.535	United_States	North_America	Human	H. pylori	Ubiquitous	Human	Muñoz-Ramirez et al., 2020, 10.1038/s41396-020-00758-0
GCA_009741205.1	NO	NO	hpAfrica1	YES	0.9035	58	NCBI	38.7946	-106.535	United_States	North_America	Human	H. pylori	Ubiquitous	Human	Saranathan et al., 2020, 10.1128/JCM.01591-19
GCA_009740535.1	NO	NO	hpAfrica1	YES	0.8975	58	NCBI	38.7946	-106.535	United_States	North_America	Human	H. pylori	Ubiquitous	Human	Saranathan et al., 2020, 10.1128/JCM.01591-19
GCA_009741045.1	NO	NO	hpAfrica1	YES	0.8697	58	NCBI	38.7946	-106.535	United_States	North_America	Human	H. pylori	Ubiquitous	Human	Saranathan et al., 2020, 10.1128/JCM.01591-19
HEL_AA6761AA_AS	NO	NO	hpAfrica1	YES	0.9012	59	Entero	5	-72	Colombia	South_America	Human	H. pylori	Ubiquitous	Human	Muñoz-Ramirez et al., 2017, 10.3389/fcimb.2017.00050
HEL_BA5187AA_AS	NO	NO	hpAfrica1	YES	0.9072	59	Entero	4.38	-74.05	Colombia	South_America	Human	H. pylori	Ubiquitous	Human	Gutierrez-Escobar et al., 2017, 10.1186/s13099-017-0201-1
HEL_BA5735AA_AS	NO	NO	hpAfrica1	YES	0.9	59	Entero	-30.5595	22.9375	South_Africa	Africa	Human	H. pylori	Ubiquitous	Human	Didelot et al., 2013, 10.1073/pnas.1304681110
HEL_BA8358AA_AS	NO	NO	hpAfrica1	YES	0.8969	59	Entero	-30.5595	22.9375	South_Africa	Africa	Human	H. pylori	Ubiquitous	Human	European Bioinformatics Institute
HEL_AA5508AA_AS	NO	NO	hpAfrica1	YES	0.8776	59	Entero	13	-15	Gambia	Africa	Human	H. pylori	Ubiquitous	Human	Human Microbiome Project (HMP)
GCA_009740465.1	NO	NO	hpAfrica1	YES	0.8997	59	NCBI	38.7946	-106.535	United_States	North_America	Human	H. pylori	Ubiquitous	Human	Saranathan et al., 2020, 10.1128/JCM.01591-19
HEL_CA3847AA_AS	NO	NO	hpAfrica1	YES	0.9076	60	Entero	18.7357	-70.1627	Dominican_Republic	South_America	Human	H. pylori	Ubiquitous	Human	Tourrette et al., 2024, 10.1038/s41586-024-07991-z
HEL_CA6270AA_AS	NO	NO	hpAfrica1	YES	0.9069	60	Entero	39.3999	-8.22445	Portugal	Europe	Human	H. pylori	Ubiquitous	Human	Tourrette et al., 2024, 10.1038/s41586-024-07991-z from Falush
HEL_AA5513AA_AS	NO	NO	hpAfrica1	YES	0.8998	60	Entero	13	-15	Gambia	Africa	Human	H. pylori	Ubiquitous	Human	Tourrette et al., 2024, 10.1038/s41586-024-07991-z from Entero database
HEL_CA6848AA_AS	NO	NO	hpAfrica1	YES	0.888	60	Entero	-0.22802	15.8277	Congo	Africa	Human	H. pylori	Ubiquitous	Human	Tourrette et al., 2024, 10.1038/s41586-024-07991-z
HEL_CA4129AA_AS	NO	NO	hpAfrica1	YES	0.8876	60	Entero	-0.22802	15.8277	Congo	Africa	Human	H. pylori	Ubiquitous	Human	Tourrette et al., 2024, 10.1038/s41586-024-07991-z
HEL_AA6664AA_AS	NO	NO	hpAfrica1	YES	0.9108	61	Entero	23.6345	-102.553	Mexico	North_America	Human	H. pylori	Ubiquitous	Human	Muñoz-Ramirez et al., 2017, 10.3389/fcimb.2017.00050
HEL_BA9183AA_AS	NO	NO	hpAfrica1	YES	0.9031	61	Entero	46.2276	2.21375	France	Europe	Human	H. pylori	Ubiquitous	Human	Tourrette et al., 2024, 10.1038/s41586-024-07991-z
HEL_CA5181AA_AS	NO	NO	hpAfrica1	YES	0.8946	61	Entero	-0.22802	15.8277	Congo	Africa	Human	H. pylori	Ubiquitous	Human	Tourrette et al., 2024, 10.1038/s41586-024-07991-z
GCA_009740725.1	NO	NO	hpAfrica1	YES	0.9041	61	NCBI	38.7946	-106.535	United_States	North_America	Human	H. pylori	Ubiquitous	Human	Saranathan et al., 2020, 10.1128/JCM.01591-19
GCA_009740805.1	NO	NO	hpAfrica1	YES	0.8781	61	NCBI	38.7946	-106.535	United_States	North_America	Human	H. pylori	Ubiquitous	Human	Saranathan et al., 2020, 10.1128/JCM.01591-19
HEL_BA5747AA_AS	NO	NO	hpAfrica1	YES	0.9039	62	Entero	-30.5595	22.9375	South_Africa	Africa	Human	H. pylori	Ubiquitous	Human	European Bioinformatics Institute
HEL_CA3831AA_AS	NO	NO	hpAfrica1	YES	0.8961	62	Entero	18.7357	-70.1627	Dominican_Republic	South_America	Human	H. pylori	Ubiquitous	Human	Tourrette et al., 2024, 10.1038/s41586-024-07991-z
GCA_014496825.1	NO	NO	hpAfrica1	YES	0.8902	62	NCBI	15.2	-86.2419	Honduras	North_America	Human	H. pylori	Ubiquitous	Human	Muñoz-Ramirez et al., 2020, 10.1038/s41396-020-00758-0
HEL_AA5478AA_AS	NO	NO	hpAfrica1	YES	0.9001	63	Entero	13	-15	Gambia	Africa	Human	H. pylori	Ubiquitous	Human	Human Microbiome Project (HMP)
HEL_CA3834AA_AS	NO	NO	hpAfrica1	YES	0.8947	64	Entero	18.7357	-70.1627	Dominican_Republic	South_America	Human	H. pylori	Ubiquitous	Human	Tourrette et al., 2024, 10.1038/s41586-024-07991-z
HEL_CA5814AA_AS	NO	NO	hpAfrica1	YES	0.8873	64	Entero	-0.22802	15.8277	Congo	Africa	Human	H. pylori	Ubiquitous	Human	Tourrette et al., 2024, 10.1038/s41586-024-07991-z
HEL_BA5086AA_AS	NO	NO	hpAfrica1	YES	0.867	64	Entero	46.2276	2.21375	France	Europe	Human	H. pylori	Ubiquitous	Human	Berthenet et al., 2018, 10.1186/s12915-018-0550-3
HEL_AA9173AA_AS	NO	NO	hpAfrica1	YES	0.9063	65	Entero	12.1506	-86.2681	Nicaragua	North_America	Human	H. pylori	Ubiquitous	Human	Gothenburg University
GCA_017594815.1	NO	NO	hpAfrica1	YES	0.9029	65	NCBI	23.6345	-102.553	Mexico	North_America	Human	H. pylori	Ubiquitous	Human	Camorlinga-Ponce et al., 2021, 10.3389/fcimb.2020.539115
GCA_015904865.1	NO	NO	hpAfrica1	YES	0.9029	65	NCBI	23.6345	-102.553	Mexico	North_America	Human	H. pylori	Ubiquitous	Human	Tourrette et al., 2024, 10.1038/s41586-024-07991-z from NCBI
GCA_009740705.1	NO	NO	hpAfrica1	YES	0.8823	65	NCBI	38.7946	-106.535	United_States	North_America	Human	H. pylori	Ubiquitous	Human	Saranathan et al., 2020, 10.1128/JCM.01591-19
HEL_CA3849AA_AS	NO	NO	hpAfrica1	YES	0.887	66	Entero	18.7357	-70.1627	Dominican_Republic	South_America	Human	H. pylori	Ubiquitous	Human	Tourrette et al., 2024, 10.1038/s41586-024-07991-z
HEL_CA5803AA_AS	NO	NO	hpAfrica1	YES	0.886	66	Entero	-0.22802	15.8277	Congo	Africa	Human	H. pylori	Ubiquitous	Human	Tourrette et al., 2024, 10.1038/s41586-024-07991-z
GCA_009740385.1	NO	NO	hpAfrica1	YES	0.8734	66	NCBI	38.7946	-106.535	United_States	North_America	Human	H. pylori	Ubiquitous	Human	Saranathan et al., 2020, 10.1128/JCM.01591-19
HEL_CA5811AA_AS	NO	NO	hpAfrica1	YES	0.8893	67	Entero	-0.22802	15.8277	Congo	Africa	Human	H. pylori	Ubiquitous	Human	Tourrette et al., 2024, 10.1038/s41586-024-07991-z
HEL_CA5799AA_AS	NO	NO	hpAfrica1	YES	0.8886	67	Entero	-0.22802	15.8277	Congo	Africa	Human	H. pylori	Ubiquitous	Human	Tourrette et al., 2024, 10.1038/s41586-024-07991-z
HEL_CA5801AA_AS	NO	NO	hpAfrica1	YES	0.8886	67	Entero	-0.22802	15.8277	Congo	Africa	Human	H. pylori	Ubiquitous	Human	Tourrette et al., 2024, 10.1038/s41586-024-07991-z
GCA_009740365.1	NO	NO	hpAfrica1	YES	0.8989	67	NCBI	38.7946	-106.535	United_States	North_America	Human	H. pylori	Ubiquitous	Human	Saranathan et al., 2020, 10.1128/JCM.01591-19
GCA_014496665.1	NO	NO	hpAfrica1	YES	0.8982	67	NCBI	38.7946	-106.535	United_States	North_America	Human	H. pylori	Ubiquitous	Human	Muñoz-Ramirez et al., 2020, 10.1038/s41396-020-00758-0
HEL_CA3810AA_AS	NO	NO	hpAfrica1	YES	0.9044	68	Entero	18.7357	-70.1627	Dominican_Republic	South_America	Human	H. pylori	Ubiquitous	Human	Tourrette et al., 2024, 10.1038/s41586-024-07991-z
HEL_CA3827AA_AS	NO	NO	hpAfrica1	YES	0.8757	68	Entero	18.7357	-70.1627	Dominican_Republic	South_America	Human	H. pylori	Ubiquitous	Human	Tourrette et al., 2024, 10.1038/s41586-024-07991-z
HEL_CA3214AA_AS	NO	NO	hpAfrica1	YES	0.9059	69	Entero	46.2276	2.21375	France	Europe	Human	H. pylori	Ubiquitous	Human	Tourrette et al., 2024, 10.1038/s41586-024-07991-z from Falush
HEL_CA3722AA_AS	NO	NO	hpAfrica1	YES	0.8914	69	Entero	-0.22802	15.8277	Congo	Africa	Human	H. pylori	Ubiquitous	Human	Tourrette et al., 2024, 10.1038/s41586-024-07991-z
HEL_CA5802AA_AS	NO	NO	hpAfrica1	YES	0.8821	69	Entero	-0.22802	15.8277	Congo	Africa	Human	H. pylori	Ubiquitous	Human	Tourrette et al., 2024, 10.1038/s41586-024-07991-z
HEL_AA5507AA_AS	NO	NO	hpAfrica1	YES	0.8713	70	Entero	13	-15	Gambia	Africa	Human	H. pylori	Ubiquitous	Human	Tourrette et al., 2024, 10.1038/s41586-024-07991-z from Entero database
HEL_CA3859AA_AS	NO	NO	hpAfrica1	YES	0.8685	70	Entero	18.7357	-70.1627	Dominican_Republic	South_America	Human	H. pylori	Ubiquitous	Human	Tourrette et al., 2024, 10.1038/s41586-024-07991-z
HEL_BA8353AA_AS	NO	NO	hpAfrica1	YES	0.9014	71	Entero	-30.5595	22.9375	South_Africa	Africa	Human	H. pylori	Ubiquitous	Human	European Bioinformatics Institute
HEL_CA5800AA_AS	NO	NO	hpAfrica1	YES	0.8939	71	Entero	-0.22802	15.8277	Congo	Africa	Human	H. pylori	Ubiquitous	Human	Tourrette et al., 2024, 10.1038/s41586-024-07991-z
HEL_CA5215AA_AS	NO	NO	hpAfrica1	YES	0.8928	71	Entero	-0.22802	15.8277	Congo	Africa	Human	H. pylori	Ubiquitous	Human	Tourrette et al., 2024, 10.1038/s41586-024-07991-z
GCA_014497745.1	NO	NO	hpAfrica1	YES	0.8781	71	NCBI	15.2	-86.2419	Honduras	North_America	Human	H. pylori	Ubiquitous	Human	Muñoz-Ramirez et al., 2020, 10.1038/s41396-020-00758-0
HEL_AA5936AA_AS	NO	NO	hpAfrica1	YES	0.909	72	Entero	5.66	-67.62	Venezuela	South_America	Human	H. pylori	Ubiquitous	Human	Tourrette et al., 2024, 10.1038/s41586-024-07991-z
HEL_CA5807AA_AS	NO	NO	hpAfrica1	YES	0.8938	72	Entero	-0.22802	15.8277	Congo	Africa	Human	H. pylori	Ubiquitous	Human	Tourrette et al., 2024, 10.1038/s41586-024-07991-z
HEL_AA5483AA_AS	NO	NO	hpAfrica1	YES	0.8707	72	Entero	13	-15	Gambia	Africa	Human	H. pylori	Ubiquitous	Human	Human Microbiome Project (HMP)
HEL_AA7201AA_AS	NO	NO	hpAfrica1	YES	0.8953	74	Entero	-22.9576	18.4904	Namibia	Africa	Human	H. pylori	Ubiquitous	Human	Tourrette et al., 2024, 10.1038/s41586-024-07991-z
HEL_CA3729AA_AS	NO	NO	hpAfrica1	YES	0.8919	74	Entero	-0.22802	15.8277	Congo	Africa	Human	H. pylori	Ubiquitous	Human	Tourrette et al., 2024, 10.1038/s41586-024-07991-z
GCA_902846045.1	NO	NO	hpAfrica1	YES	0.9048	75	NCBI	31.0461	34.8516	Israel	West_Asia	Human	H. pylori	Ubiquitous	Human	Tourrette et al., 2024, 10.1038/s41586-024-07991-z from NCBI
HEL_CA3815AA_AS	NO	NO	hpAfrica1	YES	0.9065	76	Entero	18.7357	-70.1627	Dominican_Republic	South_America	Human	H. pylori	Ubiquitous	Human	Tourrette et al., 2024, 10.1038/s41586-024-07991-z
HEL_AA7296AA_AS	NO	NO	hpAfrica1	YES	0.8879	76	Entero	-23.36	120.78	Australia	Oceania	Human	H. pylori	Ubiquitous	Human	Tourrette et al., 2024, 10.1038/s41586-024-07991-z
HEL_CA3860AA_AS	NO	NO	hpAfrica1	YES	0.8822	79	Entero	18.7357	-70.1627	Dominican_Republic	South_America	Human	H. pylori	Ubiquitous	Human	Tourrette et al., 2024, 10.1038/s41586-024-07991-z
HEL_CA5702AA_AS	NO	NO	hpAfrica1	YES	0.8996	81	Entero	-0.78928	113.921	Indonesia	Southeast_Asia	Human	H. pylori	Ubiquitous	Human	Tourrette et al., 2024, 10.1038/s41586-024-07991-z
HEL_CA5816AA_AS	NO	NO	hpAfrica1	YES	0.893	81	Entero	-0.22802	15.8277	Congo	Africa	Human	H. pylori	Ubiquitous	Human	Tourrette et al., 2024, 10.1038/s41586-024-07991-z
HEL_CA3723AA_AS	NO	NO	hpAfrica1	YES	0.8773	81	Entero	-0.22802	15.8277	Congo	Africa	Human	H. pylori	Ubiquitous	Human	Tourrette et al., 2024, 10.1038/s41586-024-07991-z
GCA_014498675.1	NO	NO	hpAfrica1	YES	0.9021	81	NCBI	-14.235	-51.9253	Brazil	South_America	Human	H. pylori	Ubiquitous	Human	Muñoz-Ramirez et al., 2020, 10.1038/s41396-020-00758-0
HEL_CA3812AA_AS	NO	NO	hpAfrica1	YES	0.882	82	Entero	18.7357	-70.1627	Dominican_Republic	South_America	Human	H. pylori	Ubiquitous	Human	Tourrette et al., 2024, 10.1038/s41586-024-07991-z
HEL_CA5731AA_AS	NO	NO	hpAfrica1	YES	0.897	83	Entero	-0.78928	113.921	Indonesia	Southeast_Asia	Human	H. pylori	Ubiquitous	Human	Tourrette et al., 2024, 10.1038/s41586-024-07991-z
HEL_CA3726AA_AS	NO	NO	hpAfrica1	YES	0.8955	83	Entero	-0.22802	15.8277	Congo	Africa	Human	H. pylori	Ubiquitous	Human	Tourrette et al., 2024, 10.1038/s41586-024-07991-z
HEL_BA9195AA_AS	NO	NO	hpAfrica1	YES	0.8897	84	Entero	-23.4	133.5	Australia	Oceania	Human	H. pylori	Ubiquitous	Human	Tourrette et al., 2024, 10.1038/s41586-024-07991-z
HEL_CA5805AA_AS	NO	NO	hpAfrica1	YES	0.9019	85	Entero	-0.22802	15.8277	Congo	Africa	Human	H. pylori	Ubiquitous	Human	Tourrette et al., 2024, 10.1038/s41586-024-07991-z
HEL_AA5948AA_AS	NO	NO	hpAfrica1	YES	0.8957	85	Entero	14.41	-17.27	Senegal	Africa	Human	H. pylori	Ubiquitous	Human	Tourrette et al., 2024, 10.1038/s41586-024-07991-z
HEL_AA7390AA_AS	NO	NO	hpAfrica1	YES	0.8893	85	Entero	-23.36	120.78	Australia	Oceania	Human	H. pylori	Ubiquitous	Human	Tourrette et al., 2024, 10.1038/s41586-024-07991-z
HEL_AA8702AA_AS	NO	NO	hpAfrica1	YES	0.8961	86	Entero	12.1494	-86.311	Nicaragua	North_America	Human	H. pylori	Ubiquitous	Human	kaisa.thorell@gmail.com
HEL_CA5810AA_AS	NO	NO	hpAfrica1	YES	0.8809	87	Entero	-0.22802	15.8277	Congo	Africa	Human	H. pylori	Ubiquitous	Human	Tourrette et al., 2024, 10.1038/s41586-024-07991-z
HEL_CA3742AA_AS	NO	NO	hpAfrica1	YES	0.9121	88	Entero	-0.22802	15.8277	Congo	Africa	Human	H. pylori	Ubiquitous	Human	Tourrette et al., 2024, 10.1038/s41586-024-07991-z
HEL_AA7299AA_AS	NO	NO	hpAfrica1	YES	0.8774	88	Entero	14.41	-17.27	Senegal	Africa	Human	H. pylori	Ubiquitous	Human	Tourrette et al., 2024, 10.1038/s41586-024-07991-z
HEL_CA5804AA_AS	NO	NO	hpAfrica1	YES	0.906	90	Entero	-0.22802	15.8277	Congo	Africa	Human	H. pylori	Ubiquitous	Human	Tourrette et al., 2024, 10.1038/s41586-024-07991-z
HEL_BA9555AA_AS	NO	NO	hpAfrica1	YES	0.9029	90	Entero	-30.5595	22.9375	South_Africa	Africa	Human	H. pylori	Ubiquitous	Human	Tourrette et al., 2024, 10.1038/s41586-024-07991-z
HEL_BA5101AA_AS	NO	NO	hpAfrica1	YES	0.8988	90	Entero	46.2276	2.21375	France	Europe	Human	H. pylori	Ubiquitous	Human	Berthenet et al., 2018, 10.1186/s12915-018-0550-3
HEL_CA3813AA_AS	NO	NO	hpAfrica1	YES	0.9017	92	Entero	18.7357	-70.1627	Dominican_Republic	South_America	Human	H. pylori	Ubiquitous	Human	Tourrette et al., 2024, 10.1038/s41586-024-07991-z
HEL_AA0448AA_AS	NO	NO	hpAfrica1	YES	0.8926	92	Entero	39.3999	-8.22445	Portugal	Europe	Human	H. pylori	Ubiquitous	Human	Vale et al., 2017, 10.1038/srep42471
HEL_BA8873AA_AS	NO	NO	hpAfrica1	YES	0.8958	93	Entero	-33.9	18.49	South_Africa	Africa	Human	H. pylori	Ubiquitous	Human	Tourrette et al., 2024, 10.1038/s41586-024-07991-z
HEL_BA8298AA_AS	NO	NO	hpAfrica1	YES	0.9006	94	Entero	-30.5595	22.9375	South_Africa	Africa	Human	H. pylori	Ubiquitous	Human	European Bioinformatics Institute
HEL_AA7359AA_AS	NO	NO	hpAfrica1	YES	0.8905	95	Entero	-22.9576	18.4904	Namibia	Africa	Human	H. pylori	Ubiquitous	Human	Tourrette et al., 2024, 10.1038/s41586-024-07991-z
HEL_CA6256AA_AS	NO	NO	hpAfrica1	YES	0.8846	97	Entero	39.3999	-8.22445	Portugal	Europe	Human	H. pylori	Ubiquitous	Human	Tourrette et al., 2024, 10.1038/s41586-024-07991-z from Falush
HEL_CA3759AA_AS	NO	NO	hpAfrica1	YES	0.8784	98	Entero	5	-72	Colombia	South_America	Human	H. pylori	Ubiquitous	Human	Tourrette et al., 2024, 10.1038/s41586-024-07991-z
HEL_BA8361AA_AS	NO	NO	hpAfrica1	YES	0.8988	103	Entero	-30.5595	22.9375	South_Africa	Africa	Human	H. pylori	Ubiquitous	Human	Didelot et al., 2013, 10.1073/pnas.1304681110
HEL_AA7317AA_AS	NO	NO	hpAfrica1	YES	0.9073	104	Entero	14.41	-17.27	Senegal	Africa	Human	H. pylori	Ubiquitous	Human	Moodley et al., 2021, 10.1073/pnas.2015523118
HEL_BA5308AA_AS	NO	NO	hpAfrica1	YES	0.8952	113	Entero	19.4978	-99.1269	Mexico	North_America	Human	H. pylori	Ubiquitous	Human	Muñoz-Ramirez et al., 2017, 10.3389/fcimb.2017.00050
HEL_CA3720AA_AS	NO	NO	hpAfrica1	YES	0.8874	118	Entero	-0.22802	15.8277	Congo	Africa	Human	H. pylori	Ubiquitous	Human	Tourrette et al., 2024, 10.1038/s41586-024-07991-z
HEL_AA5949AA_AS	NO	NO	hpAfrica1	YES	0.8922	119	Entero	14.41	-17.27	Senegal	Africa	Human	H. pylori	Ubiquitous	Human	Moodley et al., 2021, 10.1073/pnas.2015523118
HEL_CA5812AA_AS	NO	NO	hpAfrica1	YES	0.8929	128	Entero	-0.22802	15.8277	Congo	Africa	Human	H. pylori	Ubiquitous	Human	Tourrette et al., 2024, 10.1038/s41586-024-07991-z
HEL_CA3728AA_AS	NO	NO	hpAfrica1	YES	0.8862	137	Entero	-0.22802	15.8277	Congo	Africa	Human	H. pylori	Ubiquitous	Human	Tourrette et al., 2024, 10.1038/s41586-024-07991-z
HEL_CA3868AA_AS	NO	NO	hpAfrica1	YES	0.8974	141	Entero	18.7357	-70.1627	Dominican_Republic	South_America	Human	H. pylori	Ubiquitous	Human	Tourrette et al., 2024, 10.1038/s41586-024-07991-z
HEL_AA6663AA_AS	NO	NO	hpAfrica1	YES	0.9026	143	Entero	55.3781	-3.43597	United_Kingdom	Europe	Human	H. pylori	Ubiquitous	Human	Berthenet et al., 2018, 10.1186/s12915-018-0550-3
HEL_CA3721AA_AS	NO	NO	hpAfrica1	YES	0.8889	151	Entero	-0.22802	15.8277	Congo	Africa	Human	H. pylori	Ubiquitous	Human	Tourrette et al., 2024, 10.1038/s41586-024-07991-z
HEL_CA3703AA_AS	NO	NO	hpAfrica1	YES	0.8824	153	Entero	-0.22802	15.8277	Congo	Africa	Human	H. pylori	Ubiquitous	Human	Tourrette et al., 2024, 10.1038/s41586-024-07991-z
HEL_CA3715AA_AS	NO	NO	hpAfrica1	YES	0.8821	157	Entero	-0.22802	15.8277	Congo	Africa	Human	H. pylori	Ubiquitous	Human	Tourrette et al., 2024, 10.1038/s41586-024-07991-z
GCA_014497205.1	NO	NO	hpAfrica1	YES	0.8892	162	NCBI	38.7946	-106.535	United_States	North_America	Human	H. pylori	Ubiquitous	Human	Muñoz-Ramirez et al., 2020, 10.1038/s41396-020-00758-0
HEL_CA3724AA_AS	NO	NO	hpAfrica1	YES	0.89	168	Entero	-0.22802	15.8277	Congo	Africa	Human	H. pylori	Ubiquitous	Human	Tourrette et al., 2024, 10.1038/s41586-024-07991-z
HEL_CA3725AA_AS	NO	NO	hpAfrica1	YES	0.89	168	Entero	-0.22802	15.8277	Congo	Africa	Human	H. pylori	Ubiquitous	Human	Tourrette et al., 2024, 10.1038/s41586-024-07991-z
HEL_AA7352AA_AS	NO	NO	hpAfrica1	YES	0.893	169	Entero	-22.9576	18.4904	Namibia	Africa	Human	H. pylori	Ubiquitous	Human	Moodley et al., 2021, 10.1073/pnas.2015523118
HEL_CA3704AA_AS	NO	NO	hpAfrica1	YES	0.8844	173	Entero	-0.22802	15.8277	Congo	Africa	Human	H. pylori	Ubiquitous	Human	Tourrette et al., 2024, 10.1038/s41586-024-07991-z
HEL_CA3706AA_AS	NO	NO	hpAfrica1	YES	0.8844	173	Entero	-0.22802	15.8277	Congo	Africa	Human	H. pylori	Ubiquitous	Human	Tourrette et al., 2024, 10.1038/s41586-024-07991-z
HEL_CA3708AA_AS	NO	NO	hpAfrica1	YES	0.8844	173	Entero	-0.22802	15.8277	Congo	Africa	Human	H. pylori	Ubiquitous	Human	Tourrette et al., 2024, 10.1038/s41586-024-07991-z
HEL_AA5973AA_AS	NO	NO	hpAfrica1	YES	0.8876	183	Entero	10.25	-66.42	Venezuela	South_America	Human	H. pylori	Ubiquitous	Human	Tourrette et al., 2024, 10.1038/s41586-024-07991-z
GCA_009740565.1	NO	NO	hpAfrica1	YES	0.8345	188	NCBI	38.7946	-106.535	United_States	North_America	Human	H. pylori	Ubiquitous	Human	Saranathan et al., 2020, 10.1128/JCM.01591-19
HEL_CA3711AA_AS	NO	NO	hpAfrica1	YES	0.8912	197	Entero	-0.22802	15.8277	Congo	Africa	Human	H. pylori	Ubiquitous	Human	Tourrette et al., 2024, 10.1038/s41586-024-07991-z
HEL_BA9753AA_AS	NO	NO	hpAfrica1	YES	0.909	200	Entero	-30.5595	22.9375	South_Africa	Africa	Human	H. pylori	Ubiquitous	Human	Tourrette et al., 2024, 10.1038/s41586-024-07991-z
HEL_BA8467AA_AS	NO	NO	hpAfrica1	YES	0.9121	205	Entero	23.6345	-102.553	Mexico	North_America	Human	H. pylori	Ubiquitous	Human	Camorlinga-Ponce et al., 2021, 10.3389/fcimb.2020.539115
HEL_BA5084AA_AS	NO	NO	hpAfrica1	YES	0.8944	207	Entero	46.2276	2.21375	France	Europe	Human	H. pylori	Ubiquitous	Human	Berthenet et al., 2018, 10.1186/s12915-018-0550-3
HEL_AA7374AA_AS	NO	NO	hpAfrica1	YES	0.8958	221	Entero	-22.9576	18.4904	Namibia	Africa	Human	H. pylori	Ubiquitous	Human	Tourrette et al., 2024, 10.1038/s41586-024-07991-z
HEL_CA5808AA_AS	NO	NO	hpAfrica1	YES	0.8849	230	Entero	-0.22802	15.8277	Congo	Africa	Human	H. pylori	Ubiquitous	Human	Tourrette et al., 2024, 10.1038/s41586-024-07991-z
GCA_009798365.1	NO	NO	hpAfrica1	YES	0.9018	306	NCBI	31.7917	-7.09262	Morocco	Africa	Human	H. pylori	Ubiquitous	Human	Kartti et al., 2020, 10.1128/MRA.00714-20
HEL_BA4091AA_AS	NO	NO	hpAfrica1	YES	0.8986	346	Entero	41.5573	2.1095	Spain	Europe	Human	H. pylori	Ubiquitous	Human	Facultat de Farmacia i Ciencies de l'Alimentacio; Universitat de Barcelona
HEL_BA5767AA_AS	NO	NO	hpAfrica1	YES	0.8061	360	Entero	5	-72	Colombia	South_America	Human	H. pylori	Ubiquitous	Human	Sheh et al., 2013, 10.1128/genomeA.00736-13
HEL_CA3731AA_AS	NO	NO	hpAfrica1	YES	0.8908	388	Entero	-0.22802	15.8277	Congo	Africa	Human	H. pylori	Ubiquitous	Human	Tourrette et al., 2024, 10.1038/s41586-024-07991-z
HEL_CA3828AA_AS	NO	NO	hpAfrica1	YES	0.8988	441	Entero	18.7357	-70.1627	Dominican_Republic	South_America	Human	H. pylori	Ubiquitous	Human	Tourrette et al., 2024, 10.1038/s41586-024-07991-z
HEL_CA5512AA_AS	YES	YES	hpAfrica2	YES	0.8634	1	Entero	-30.5595	22.9375	South_Africa	Africa	Human	H. pylori	Ubiquitous	Human	Tourrette et al., 2024, 10.1038/s41586-024-07991-z from Falush
HEL_CA5533AA_AS	YES	YES	hpAfrica2	YES	0.8814	1	Entero	-30.5595	22.9375	South_Africa	Africa	Human	H. pylori	Ubiquitous	Human	Tourrette et al., 2024, 10.1038/s41586-024-07991-z from Falush
HEL_CA5523AA_AS	YES	YES	hpAfrica2	YES	0.8736	1	Entero	-30.5595	22.9375	South_Africa	Africa	Human	H. pylori	Ubiquitous	Human	Tourrette et al., 2024, 10.1038/s41586-024-07991-z from Falush
HEL_BA9494AA_AS	YES	YES	hpAfrica2	YES	0.8683	21	Entero	-33.55	18.25	South_Africa	Africa	Human	H. pylori	Ubiquitous	Human	Tourrette et al., 2024, 10.1038/s41586-024-07991-z
HEL_BA9328AA_AS	YES	YES	hpAfrica2	YES	0.8648	29	Entero	-30.5595	22.9375	South_Africa	Africa	Human	H. pylori	Ubiquitous	Human	Tourrette et al., 2024, 10.1038/s41586-024-07991-z
HEL_BA5706AA_AS	YES	YES	hpAfrica2	YES	0.8671	31	Entero	-30.5595	22.9375	South_Africa	Africa	Human	H. pylori	Ubiquitous	Human	Didelot et al., 2013, 10.1073/pnas.1304681110
HEL_AA0316AA_AS	YES	YES	hpAfrica2	YES	0.8445	1	Entero	-15.3	19	Angola	Africa	Human	H. pylori	Ubiquitous	Human	Veterinary Medicine University of Vienna
HEL_CA5459AA_AS	YES	YES	hpAfrica2	YES	0.87	1	Entero	-30.5595	22.9375	South_Africa	Africa	Human	H. pylori	Ubiquitous	Human	Tourrette et al., 2024, 10.1038/s41586-024-07991-z from Falush
HEL_AA0363AA_AS	YES	YES	hpAfrica2	YES	0.8656	2	Entero	-30.5595	22.9375	South_Africa	Africa	Human	H. pylori	Ubiquitous	Human	Tourrette et al., 2024, 10.1038/s41586-024-07991-z from Entero database
HEL_BA4143AA_AS	YES	YES	hpAfrica2	YES	0.8569	32	Entero	-25.2744	133.775	Australia	Oceania	Human	H. pylori	Ubiquitous	Human	Chua et al., 2019, 10.1093/gastro/goy048
HEL_BA9749AA_AS	NO	YES	hpAfrica2	YES	0.8652	32	Entero	-30.5595	22.9375	South_Africa	Africa	Human	H. pylori	Ubiquitous	Human	Tourrette et al., 2024, 10.1038/s41586-024-07991-z
HEL_BA8345AA_AS	NO	YES	hpAfrica2	YES	0.8678	57	Entero	-30.5595	22.9375	South_Africa	Africa	Human	H. pylori	Ubiquitous	Human	Didelot et al., 2013, 10.1073/pnas.1304681110
HEL_AA7351AA_AS	NO	YES	hpAfrica2	YES	0.8677	74	Entero	-30.5595	22.9375	South_Africa	Africa	Human	H. pylori	Ubiquitous	Human	Tourrette et al., 2024, 10.1038/s41586-024-07991-z
HEL_AA0401AA_AS	NO	YES	hpAfrica2	YES	0.8651	1	Entero	-30.5595	22.9375	South_Africa	Africa	Human	H. pylori	Ubiquitous	Human	Tourrette et al., 2024, 10.1038/s41586-024-07991-z from Entero database
HEL_BA5709AA_AS	NO	YES	hpAfrica2	YES	0.8718	29	Entero	-30.5595	22.9375	South_Africa	Africa	Human	H. pylori	Ubiquitous	Human	Didelot et al., 2013, 10.1073/pnas.1304681110
HEL_BA9306AA_AS	NO	YES	hpAfrica2	YES	0.8553	34	Entero	46.2276	2.21375	France	Europe	Human	H. pylori	Ubiquitous	Human	Tourrette et al., 2024, 10.1038/s41586-024-07991-z
HEL_BA5671AA_AS	NO	YES	hpAfrica2	YES	0.8649	35	Entero	-30.5595	22.9375	South_Africa	Africa	Human	H. pylori	Ubiquitous	Human	Didelot et al., 2013, 10.1073/pnas.1304681110
HEL_BA8992AA_AS	NO	YES	hpAfrica2	YES	0.8675	37	Entero	-25.75	28.2	South_Africa	Africa	Human	H. pylori	Ubiquitous	Human	Tourrette et al., 2024, 10.1038/s41586-024-07991-z
HEL_BA9002AA_AS	NO	YES	hpAfrica2	YES	0.8713	39	Entero	-30.5595	22.9375	South_Africa	Africa	Human	H. pylori	Ubiquitous	Human	Tourrette et al., 2024, 10.1038/s41586-024-07991-z
HEL_BA8355AA_AS	NO	YES	hpAfrica2	YES	0.8651	39	Entero	-30.5595	22.9375	South_Africa	Africa	Human	H. pylori	Ubiquitous	Human	European Bioinformatics Institute
HEL_BA5703AA_AS	NO	YES	hpAfrica2	YES	0.8689	44	Entero	-30.5595	22.9375	South_Africa	Africa	Human	H. pylori	Ubiquitous	Human	European Bioinformatics Institute
HEL_AA7309AA_AS	NO	YES	hpAfrica2	YES	0.8665	48	Entero	-22.9576	18.4904	Namibia	Africa	Human	H. pylori	Ubiquitous	Human	Tourrette et al., 2024, 10.1038/s41586-024-07991-z
HEL_BA5699AA_AS	NO	YES	hpAfrica2	YES	0.8639	53	Entero	-30.5595	22.9375	South_Africa	Africa	Human	H. pylori	Ubiquitous	Human	European Bioinformatics Institute
HEL_AA7200AA_AS	NO	YES	hpAfrica2	YES	0.8625	56	Entero	-22.9576	18.4904	Namibia	Africa	Human	H. pylori	Ubiquitous	Human	Tourrette et al., 2024, 10.1038/s41586-024-07991-z
HEL_BA8916AA_AS	NO	YES	hpAfrica2	YES	0.8578	57	Entero	46.2276	2.21375	France	Europe	Human	H. pylori	Ubiquitous	Human	Tourrette et al., 2024, 10.1038/s41586-024-07991-z
HEL_BA8309AA_AS	NO	YES	hpAfrica2	YES	0.8624	88	Entero	-30.5595	22.9375	South_Africa	Africa	Human	H. pylori	Ubiquitous	Human	Didelot et al., 2013, 10.1073/pnas.1304681110
HEL_AA7376AA_AS	NO	YES	hpAfrica2	YES	0.8673	117	Entero	-30.5595	22.9375	South_Africa	Africa	Human	H. pylori	Ubiquitous	Human	Tourrette et al., 2024, 10.1038/s41586-024-07991-z
HEL_BA9262AA_AS	NO	YES	hpAfrica2	YES	0.7798	181	Entero	61.524	105.319	Russia	North_Asia	Human	H. acinonychis	Hardy	Human	Tourrette et al., 2024, 10.1038/s41586-024-07991-z
HEL_AA7371AA_AS	NO	YES	hpAfrica2	YES	0.865	449	Entero	-30.5595	22.9375	South_Africa	Africa	Human	H. pylori	Ubiquitous	Human	Tourrette et al., 2024, 10.1038/s41586-024-07991-z
HEL_BA5731AA_AS	NO	NO	hpAfrica2	YES	0.8448	54	Entero	-30.5595	22.9375	South_Africa	Africa	Human	H. pylori	Ubiquitous	Human	Didelot et al., 2013, 10.1073/pnas.1304681110
HEL_BA5728AA_AS	NO	NO	hpAfrica2	YES	0.8572	55	Entero	-30.5595	22.9375	South_Africa	Africa	Human	H. pylori	Ubiquitous	Human	European Bioinformatics Institute
HEL_AA7356AA_AS	NO	NO	hpAfrica2	YES	0.8497	57	Entero	-22.9576	18.4904	Namibia	Africa	Human	H. pylori	Ubiquitous	Human	Tourrette et al., 2024, 10.1038/s41586-024-07991-z
HEL_AA7215AA_AS	NO	NO	hpAfrica2	YES	0.8534	100	Entero	-22.9576	18.4904	Namibia	Africa	Human	H. pylori	Ubiquitous	Human	Tourrette et al., 2024, 10.1038/s41586-024-07991-z
HEL_AA7378AA_AS	NO	NO	hpAfrica2	YES	0.8537	118	Entero	-30.5595	22.9375	South_Africa	Africa	Human	H. pylori	Ubiquitous	Human	Tourrette et al., 2024, 10.1038/s41586-024-07991-z
HEL_AA7268AA_AS	NO	NO	hpAfrica2	YES	0.8508	67	Entero	-22.9576	18.4904	Namibia	Africa	Human	H. pylori	Ubiquitous	Human	Tourrette et al., 2024, 10.1038/s41586-024-07991-z
HEL_AA7293AA_AS	NO	NO	hpAfrica2	YES	0.8536	298	Entero	-22.9576	18.4904	Namibia	Africa	Human	H. pylori	Ubiquitous	Human	Tourrette et al., 2024, 10.1038/s41586-024-07991-z
HEL_AA7350AA_AS	NO	NO	hpAfrica2	YES	0.847	100	Entero	-30.5595	22.9375	South_Africa	Africa	Human	H. pylori	Ubiquitous	Human	Tourrette et al., 2024, 10.1038/s41586-024-07991-z
HEL_AA7362AA_AS	NO	NO	hpAfrica2	YES	0.8538	89	Entero	-33.55	18.25	South_Africa	Africa	Human	H. pylori	Ubiquitous	Human	Moodley et al., 2021, 10.1073/pnas.2015523118
HEL_AA7375AA_AS	NO	NO	hpAfrica2	YES	0.8484	169	Entero	-30.5595	22.9375	South_Africa	Africa	Human	H. pylori	Ubiquitous	Human	Tourrette et al., 2024, 10.1038/s41586-024-07991-z
HEL_BA4919AA_AS	NO	NO	hpAfrica2	YES	0.8586	36	Entero	-25.2744	133.775	Australia	Oceania	Human	H. pylori	Ubiquitous	Human	Chua et al., 2019, 10.1093/gastro/goy048
HEL_BA5682AA_AS	NO	NO	hpAfrica2	YES	0.8538	40	Entero	-30.5595	22.9375	South_Africa	Africa	Human	H. pylori	Ubiquitous	Human	European Bioinformatics Institute
HEL_BA5700AA_AS	NO	NO	hpAfrica2	YES	0.8594	42	Entero	-30.5595	22.9375	South_Africa	Africa	Human	H. pylori	Ubiquitous	Human	European Bioinformatics Institute
HEL_BA5715AA_AS	NO	NO	hpAfrica2	YES	0.8591	26	Entero	-30.5595	22.9375	South_Africa	Africa	Human	H. pylori	Ubiquitous	Human	Didelot et al., 2013, 10.1073/pnas.1304681110
HEL_BA5739AA_AS	NO	NO	hpAfrica2	YES	0.86	48	Entero	-30.5595	22.9375	South_Africa	Africa	Human	H. pylori	Ubiquitous	Human	Didelot et al., 2013, 10.1073/pnas.1304681110
HEL_BA5762AA_AS	NO	NO	hpAfrica2	YES	0.8525	2	Entero	-30.5595	22.9375	South_Africa	Africa	Human	H. pylori	Ubiquitous	Human	Tourrette et al., 2024, 10.1038/s41586-024-07991-z from Entero database
HEL_BA9540AA_AS	NO	NO	hpAfrica2	YES	0.8571	45	Entero	-30.5595	22.9375	South_Africa	Africa	Human	H. pylori	Ubiquitous	Human	Tourrette et al., 2024, 10.1038/s41586-024-07991-z
HEL_AA0408AA_AS	NO	NO	hpAfrica2	YES	0.7614	2	Entero	-30.5595	22.9375	South_Africa	Africa	Human	H. acinonychis	Hardy	Human	Eppinger et al., 2006, 10.1371/journal.pgen.0020120
HEL_BA5696AA_AS	NO	NO	hpAfrica2	YES	0.854	43	Entero	-30.5595	22.9375	South_Africa	Africa	Human	H. pylori	Ubiquitous	Human	European Bioinformatics Institute
HEL_BA5713AA_AS	NO	NO	hpAfrica2	YES	0.8482	48	Entero	-30.5595	22.9375	South_Africa	Africa	Human	H. pylori	Ubiquitous	Human	European Bioinformatics Institute
HEL_AA7199AA_AS	NO	NO	hpAfrica2	YES	0.8657	49	Entero	-22.9576	18.4904	Namibia	Africa	Human	H. pylori	Ubiquitous	Human	Tourrette et al., 2024, 10.1038/s41586-024-07991-z
HEL_BA5666AA_AS	NO	NO	hpAfrica2	YES	0.8573	50	Entero	-30.5595	22.9375	South_Africa	Africa	Human	H. pylori	Ubiquitous	Human	Didelot et al., 2013, 10.1073/pnas.1304681110
HEL_BA5677AA_AS	NO	NO	hpAfrica2	YES	0.8581	57	Entero	-30.5595	22.9375	South_Africa	Africa	Human	H. pylori	Ubiquitous	Human	Didelot et al., 2013, 10.1073/pnas.1304681110
HEL_AA7329AA_AS	NO	NO	hpAfrica2	YES	0.8617	67	Entero	-30.5595	22.9375	South_Africa	Africa	Human	H. pylori	Ubiquitous	Human	Tourrette et al., 2024, 10.1038/s41586-024-07991-z
HEL_AA7368AA_AS	NO	NO	hpAfrica2	YES	0.8522	70	Entero	-22.9576	18.4904	Namibia	Africa	Human	H. pylori	Ubiquitous	Human	Tourrette et al., 2024, 10.1038/s41586-024-07991-z
HEL_AA7288AA_AS	NO	NO	hpAfrica2	YES	0.8552	73	Entero	-22.9576	18.4904	Namibia	Africa	Human	H. pylori	Ubiquitous	Human	Tourrette et al., 2024, 10.1038/s41586-024-07991-z
HEL_AA7206AA_AS	NO	NO	hpAfrica2	YES	0.8562	86	Entero	-22.9576	18.4904	Namibia	Africa	Human	H. pylori	Ubiquitous	Human	Moodley et al., 2021, 10.1073/pnas.2015523118
HEL_BA8291AA_AS	NO	NO	hpAfrica2	YES	0.8616	91	Entero	-30.5595	22.9375	South_Africa	Africa	Human	H. pylori	Ubiquitous	Human	Didelot et al., 2013, 10.1073/pnas.1304681110
HEL_AA5921AA_AS	YES	YES	hpAsia2	YES	0.9026	48	Entero	23.87	90.07	Bangladesh	South_Asia	Human	H. pylori	Ubiquitous	Human	Moodley et al., 2021, 10.1073/pnas.2015523118
GCA_024405915.1	YES	YES	hpAsia2	YES	0.8931	30	NCBI	15.87	100.993	Thailand	Southeast_Asia	Human	H. pylori	Ubiquitous	Human	Thorpe et al., 2022, 10.1038/s41467-022-34475-3
HEL_BA5609AA_AS	YES	YES	hpAsia2	YES	0.9257	17	Entero	4.21048	101.976	Malaysia	Southeast_Asia	Human	H. pylori	Ubiquitous	Human	University of Malaya
HEL_BA8064AA_AS	YES	YES	hpAsia2	YES	0.9212	66	Entero	4.21048	101.976	Malaysia	Southeast_Asia	Human	H. pylori	Ubiquitous	Human	University of Malaya
HEL_BA8206AA_AS	YES	YES	hpAsia2	YES	0.914	17	Entero	4.21048	101.976	Malaysia	Southeast_Asia	Human	H. pylori	Ubiquitous	Human	University of Malaya
HEL_CA3169AA_AS	YES	YES	hpAsia2	YES	0.8971	48	Entero	23.685	90.3563	Bangladesh	South_Asia	Human	H. pylori	Ubiquitous	Human	Tourrette et al., 2024, 10.1038/s41586-024-07991-z
HEL_CA3210AA_AS	YES	YES	hpAsia2	YES	0.9106	55	Entero	23.685	90.3563	Bangladesh	South_Asia	Human	H. pylori	Ubiquitous	Human	Tourrette et al., 2024, 10.1038/s41586-024-07991-z
HEL_CA3282AA_AS	YES	YES	hpAsia2	YES	0.8981	48	Entero	27.5142	90.4336	Bhutan	South_Asia	Human	H. pylori	Ubiquitous	Human	Tourrette et al., 2024, 10.1038/s41586-024-07991-z
HEL_CA3695AA_AS	YES	YES	hpAsia2	YES	0.9166	118	Entero	15.87	100.993	Thailand	Southeast_Asia	Human	H. pylori	Ubiquitous	Human	Tourrette et al., 2024, 10.1038/s41586-024-07991-z
HEL_CA3792AA_AS	YES	YES	hpAsia2	YES	0.8987	51	Entero	15.87	100.993	Thailand	Southeast_Asia	Human	H. pylori	Ubiquitous	Human	Tourrette et al., 2024, 10.1038/s41586-024-07991-z
NP04	NO	YES	hpAsia2	YES	0.8098	1	Datadryad	28.3949	84.124	Nepal	South_Asia	Human	H. pylori	Ubiquitous	Human	Tourrette et al., 2024, 10.1038/s41586-024-07991-z from Falush
NP05_107	NO	YES	hpAsia2	YES	0.8074	1	Datadryad	28.3949	84.124	Nepal	South_Asia	Human	H. pylori	Ubiquitous	Human	Tourrette et al., 2024, 10.1038/s41586-024-07991-z from Falush
NP05_272	NO	YES	hpAsia2	YES	0.8125	1	Datadryad	28.3949	84.124	Nepal	South_Asia	Human	H. pylori	Ubiquitous	Human	Tourrette et al., 2024, 10.1038/s41586-024-07991-z from Falush
NP05_278	NO	YES	hpAsia2	YES	0.8093	1	Datadryad	28.3949	84.124	Nepal	South_Asia	Human	H. pylori	Ubiquitous	Human	Tourrette et al., 2024, 10.1038/s41586-024-07991-z from Falush
HEL_CA4433AA_AS	NO	YES	hpAsia2	YES	0.9227	1	Entero	23.685	90.3563	Bangladesh	South_Asia	Human	H. pylori	Ubiquitous	Human	Tourrette et al., 2024, 10.1038/s41586-024-07991-z from Falush
HEL_CA4833AA_AS	NO	YES	hpAsia2	YES	0.9204	1	Entero	28.3949	84.124	Nepal	South_Asia	Human	H. pylori	Ubiquitous	Human	Tourrette et al., 2024, 10.1038/s41586-024-07991-z from Falush
HEL_CA4827AA_AS	NO	YES	hpAsia2	YES	0.9073	1	Entero	21.9162	95.956	Myanmar	Southeast_Asia	Human	H. pylori	Ubiquitous	Human	Tourrette et al., 2024, 10.1038/s41586-024-07991-z from Falush
HEL_CA4829AA_AS	NO	YES	hpAsia2	YES	0.907	1	Entero	28.3949	84.124	Nepal	South_Asia	Human	H. pylori	Ubiquitous	Human	Tourrette et al., 2024, 10.1038/s41586-024-07991-z from Falush
HEL_CA5619AA_AS	NO	YES	hpAsia2	YES	0.9049	1	Entero	38.7946	-106.535	United_States	North_America	Human	H. pylori	Ubiquitous	Human	Tourrette et al., 2024, 10.1038/s41586-024-07991-z from Falush
HEL_CA4542AA_AS	NO	YES	hpAsia2	YES	0.8956	1	Entero	-0.789275	113.921	Indonesia	Southeast_Asia	Human	H. pylori	Ubiquitous	Human	Tourrette et al., 2024, 10.1038/s41586-024-07991-z from Falush
HEL_BA8203AA_AS	NO	YES	hpAsia2	YES	0.9209	16	Entero	4.21048	101.976	Malaysia	Southeast_Asia	Human	H. pylori	Ubiquitous	Human	University of Malaya
HEL_CA3137AA_AS	NO	YES	hpAsia2	YES	0.8832	25	Entero	23.685	90.3563	Bangladesh	South_Asia	Human	H. pylori	Ubiquitous	Human	Tourrette et al., 2024, 10.1038/s41586-024-07991-z
HEL_CA6171AA_AS	NO	YES	hpAsia2	YES	0.9083	34	Entero	28.3949	84.124	Nepal	South_Asia	Human	H. pylori	Ubiquitous	Human	Tourrette et al., 2024, 10.1038/s41586-024-07991-z
HEL_CA3158AA_AS	NO	YES	hpAsia2	YES	0.8975	36	Entero	23.685	90.3563	Bangladesh	South_Asia	Human	H. pylori	Ubiquitous	Human	Tourrette et al., 2024, 10.1038/s41586-024-07991-z
HEL_CA5850AA_AS	NO	YES	hpAsia2	YES	0.8947	36	Entero	21.9162	95.956	Myanmar	Southeast_Asia	Human	H. pylori	Ubiquitous	Human	Tourrette et al., 2024, 10.1038/s41586-024-07991-z
HEL_CA5584AA_AS	NO	YES	hpAsia2	YES	0.9073	37	Entero	-0.78928	113.921	Indonesia	Southeast_Asia	Human	H. pylori	Ubiquitous	Human	Tourrette et al., 2024, 10.1038/s41586-024-07991-z
HEL_BA5174AA_AS	NO	YES	hpAsia2	YES	0.9119	39	Entero	20.5937	78.9629	India	South_Asia	Human	H. pylori	Ubiquitous	Human	Shetty et al., 2019, 10.1186/s13099-019-0305-x
HEL_CA6757AA_AS	NO	YES	hpAsia2	YES	0.8965	39	Entero	21.9162	95.956	Myanmar	Southeast_Asia	Human	H. pylori	Ubiquitous	Human	Tourrette et al., 2024, 10.1038/s41586-024-07991-z
HEL_CA3155AA_AS	NO	YES	hpAsia2	YES	0.9009	40	Entero	23.685	90.3563	Bangladesh	South_Asia	Human	H. pylori	Ubiquitous	Human	Tourrette et al., 2024, 10.1038/s41586-024-07991-z
HEL_CA6098AA_AS	NO	YES	hpAsia2	YES	0.9021	41	Entero	28.3949	84.124	Nepal	South_Asia	Human	H. pylori	Ubiquitous	Human	Tourrette et al., 2024, 10.1038/s41586-024-07991-z
HEL_CA5975AA_AS	NO	YES	hpAsia2	YES	0.8972	45	Entero	21.9162	95.956	Myanmar	Southeast_Asia	Human	H. pylori	Ubiquitous	Human	Tourrette et al., 2024, 10.1038/s41586-024-07991-z
HEL_CA6138AA_AS	NO	YES	hpAsia2	YES	0.9088	48	Entero	28.3949	84.124	Nepal	South_Asia	Human	H. pylori	Ubiquitous	Human	Tourrette et al., 2024, 10.1038/s41586-024-07991-z
HEL_CA3199AA_AS	NO	YES	hpAsia2	YES	0.8998	48	Entero	23.685	90.3563	Bangladesh	South_Asia	Human	H. pylori	Ubiquitous	Human	Tourrette et al., 2024, 10.1038/s41586-024-07991-z
HEL_CA5988AA_AS	NO	YES	hpAsia2	YES	0.9145	50	Entero	21.9162	95.956	Myanmar	Southeast_Asia	Human	H. pylori	Ubiquitous	Human	Tourrette et al., 2024, 10.1038/s41586-024-07991-z
HEL_AA5920AA_AS	NO	YES	hpAsia2	YES	0.9013	50	Entero	23.87	90.07	Bangladesh	South_Asia	Human	H. pylori	Ubiquitous	Human	Moodley et al., 2021, 10.1073/pnas.2015523118
HEL_CA6452AA_AS	NO	YES	hpAsia2	YES	0.8993	50	Entero	15.87	100.993	Thailand	Southeast_Asia	Human	H. pylori	Ubiquitous	Human	Tourrette et al., 2024, 10.1038/s41586-024-07991-z
HEL_CA6148AA_AS	NO	YES	hpAsia2	YES	0.9079	54	Entero	28.3949	84.124	Nepal	South_Asia	Human	H. pylori	Ubiquitous	Human	Tourrette et al., 2024, 10.1038/s41586-024-07991-z
HEL_CA5963AA_AS	NO	YES	hpAsia2	YES	0.894	56	Entero	21.9162	95.956	Myanmar	Southeast_Asia	Human	H. pylori	Ubiquitous	Human	Tourrette et al., 2024, 10.1038/s41586-024-07991-z
HEL_CA6142AA_AS	NO	YES	hpAsia2	YES	0.9026	59	Entero	28.3949	84.124	Nepal	South_Asia	Human	H. pylori	Ubiquitous	Human	Tourrette et al., 2024, 10.1038/s41586-024-07991-z
HEL_CA5646AA_AS	NO	YES	hpAsia2	YES	0.8879	62	Entero	-0.78928	113.921	Indonesia	Southeast_Asia	Human	H. pylori	Ubiquitous	Human	Tourrette et al., 2024, 10.1038/s41586-024-07991-z
HEL_CA6124AA_AS	NO	YES	hpAsia2	YES	0.9038	66	Entero	28.3949	84.124	Nepal	South_Asia	Human	H. pylori	Ubiquitous	Human	Tourrette et al., 2024, 10.1038/s41586-024-07991-z
HEL_BA5443AA_AS	NO	YES	hpAsia2	YES	0.9044	68	Entero	20.5937	78.9629	India	South_Asia	Human	H. pylori	Ubiquitous	Human	Tourrette et al., 2024, 10.1038/s41586-024-07991-z from Entero database
HEL_CA6153AA_AS	NO	YES	hpAsia2	YES	0.9019	70	Entero	28.3949	84.124	Nepal	South_Asia	Human	H. pylori	Ubiquitous	Human	Tourrette et al., 2024, 10.1038/s41586-024-07991-z
HEL_CA6141AA_AS	NO	YES	hpAsia2	YES	0.9054	76	Entero	28.3949	84.124	Nepal	South_Asia	Human	H. pylori	Ubiquitous	Human	Tourrette et al., 2024, 10.1038/s41586-024-07991-z
HEL_CA5413AA_AS	NO	YES	hpAsia2	YES	0.8966	82	Entero	-0.78928	113.921	Indonesia	Southeast_Asia	Human	H. pylori	Ubiquitous	Human	Tourrette et al., 2024, 10.1038/s41586-024-07991-z
HEL_CA0035AA_AS	NO	YES	hpAsia2	YES	0.891	85	Entero	8.524	76.928	India	South_Asia	Human	H. pylori	Ubiquitous	Human	Mehrotra et al., 2021, 10.1016/j.ygeno.2021.10.002
HEL_CA3187AA_AS	NO	YES	hpAsia2	YES	0.8975	95	Entero	23.685	90.3563	Bangladesh	South_Asia	Human	H. pylori	Ubiquitous	Human	Tourrette et al., 2024, 10.1038/s41586-024-07991-z
HEL_CA0028AA_AS	NO	YES	hpAsia2	YES	0.8794	135	Entero	8.524	76.928	India	South_Asia	Human	H. pylori	Ubiquitous	Human	Mehrotra et al., 2021, 10.1016/j.ygeno.2021.10.002
Mandalay03	NO	NO	hpAsia2	YES	0.8098	1	Datadryad	21.9162	95.956	Myanmar	Southeast_Asia	Human	H. pylori	Ubiquitous	Human	Thorell, Yahara et al., 2017, 10.1371/journal.pgen.1006546
Mandalay30	NO	NO	hpAsia2	YES	0.8058	1	Datadryad	21.9162	95.956	Myanmar	Southeast_Asia	Human	H. pylori	Ubiquitous	Human	Thorell, Yahara et al., 2017, 10.1371/journal.pgen.1006546
Myanmar51	NO	NO	hpAsia2	YES	0.8084	1	Datadryad	21.9162	95.956	Myanmar	Southeast_Asia	Human	H. pylori	Ubiquitous	Human	Thorell, Yahara et al., 2017, 10.1371/journal.pgen.1006546
Myanmar52	NO	NO	hpAsia2	YES	0.8182	1	Datadryad	21.9162	95.956	Myanmar	Southeast_Asia	Human	H. pylori	Ubiquitous	Human	Thorell, Yahara et al., 2017, 10.1371/journal.pgen.1006546
Myanmar66	NO	NO	hpAsia2	YES	0.7992	1	Datadryad	21.9162	95.956	Myanmar	Southeast_Asia	Human	H. pylori	Ubiquitous	Human	Thorell, Yahara et al., 2017, 10.1371/journal.pgen.1006546
NP05_112	NO	NO	hpAsia2	YES	0.8063	1	Datadryad	28.3949	84.124	Nepal	South_Asia	Human	H. pylori	Ubiquitous	Human	Tourrette et al., 2024, 10.1038/s41586-024-07991-z from Falush
NP05_121	NO	NO	hpAsia2	YES	0.8098	1	Datadryad	28.3949	84.124	Nepal	South_Asia	Human	H. pylori	Ubiquitous	Human	Tourrette et al., 2024, 10.1038/s41586-024-07991-z from Falush
Yangon142	NO	NO	hpAsia2	YES	0.8073	1	Datadryad	21.9162	95.956	Myanmar	Southeast_Asia	Human	H. pylori	Ubiquitous	Human	Tourrette et al., 2024, 10.1038/s41586-024-07991-z from Falush
Yangon179	NO	NO	hpAsia2	YES	0.8073	1	Datadryad	21.9162	95.956	Myanmar	Southeast_Asia	Human	H. pylori	Ubiquitous	Human	Tourrette et al., 2024, 10.1038/s41586-024-07991-z from Falush
HEL_CA4850AA_AS	NO	NO	hpAsia2	YES	0.9345	1	Entero	28.3949	84.124	Nepal	South_Asia	Human	H. pylori	Ubiquitous	Human	Tourrette et al., 2024, 10.1038/s41586-024-07991-z from Falush
HEL_CA4822AA_AS	NO	NO	hpAsia2	YES	0.9153	1	Entero	21.9162	95.956	Myanmar	Southeast_Asia	Human	H. pylori	Ubiquitous	Human	Tourrette et al., 2024, 10.1038/s41586-024-07991-z from Falush
HEL_CA4533AA_AS	NO	NO	hpAsia2	YES	0.9064	1	Entero	20.5937	78.9629	India	South_Asia	Human	H. pylori	Ubiquitous	Human	Tourrette et al., 2024, 10.1038/s41586-024-07991-z from Falush
HEL_BA5585AA_AS	NO	NO	hpAsia2	YES	0.9041	26	Entero	4.21048	101.976	Malaysia	Southeast_Asia	Human	H. pylori	Ubiquitous	Human	University of Malaya
HEL_CA6033AA_AS	NO	NO	hpAsia2	YES	0.9046	29	Entero	15.87	100.993	Thailand	Southeast_Asia	Human	H. pylori	Ubiquitous	Human	Tourrette et al., 2024, 10.1038/s41586-024-07991-z from Falush
HEL_BA8388AA_AS	NO	NO	hpAsia2	YES	0.9213	34	Entero	4.21048	101.976	Malaysia	Southeast_Asia	Human	H. pylori	Ubiquitous	Human	Rehvathy et al., 2013, 10.1128/genomeA.00687-13
HEL_CA4141AA_AS	NO	NO	hpAsia2	YES	0.8954	34	Entero	23.685	90.3563	Bangladesh	South_Asia	Human	H. pylori	Ubiquitous	Human	Tourrette et al., 2024, 10.1038/s41586-024-07991-z
HEL_CA6108AA_AS	NO	NO	hpAsia2	YES	0.9071	47	Entero	28.3949	84.124	Nepal	South_Asia	Human	H. pylori	Ubiquitous	Human	Tourrette et al., 2024, 10.1038/s41586-024-07991-z
HEL_BA8063AA_AS	NO	NO	hpAsia2	YES	0.8954	79	Entero	4.21048	101.976	Malaysia	Southeast_Asia	Human	H. pylori	Ubiquitous	Human	Rehvathy et al., 2013, 10.1128/genomeA.00687-13
HEL_CA4813AA_AS	NO	NO	hpAsia2	YES	0.9131	1	Entero	21.9162	95.956	Myanmar	Southeast_Asia	Human	H. pylori	Ubiquitous	Human	Tourrette et al., 2024, 10.1038/s41586-024-07991-z from Falush
HEL_CA5973AA_AS	NO	NO	hpAsia2	YES	0.8879	52	Entero	21.9162	95.956	Myanmar	Southeast_Asia	Human	H. pylori	Ubiquitous	Human	Tourrette et al., 2024, 10.1038/s41586-024-07991-z
HEL_CA6081AA_AS	NO	NO	hpAsia2	YES	0.8752	58	Entero	28.3949	84.124	Nepal	South_Asia	Human	H. pylori	Ubiquitous	Human	Tourrette et al., 2024, 10.1038/s41586-024-07991-z
HEL_CA6443AA_AS	NO	NO	hpAsia2	YES	0.8951	41	Entero	15.87	100.993	Thailand	Southeast_Asia	Human	H. pylori	Ubiquitous	Human	Tourrette et al., 2024, 10.1038/s41586-024-07991-z
HEL_CA6444AA_AS	NO	NO	hpAsia2	YES	0.9171	39	Entero	15.87	100.993	Thailand	Southeast_Asia	Human	H. pylori	Ubiquitous	Human	Tourrette et al., 2024, 10.1038/s41586-024-07991-z
HEL_CA6478AA_AS	NO	NO	hpAsia2	YES	0.887	44	Entero	15.87	100.993	Thailand	Southeast_Asia	Human	H. pylori	Ubiquitous	Human	Tourrette et al., 2024, 10.1038/s41586-024-07991-z
HEL_CA6273AA_AS	NO	NO	hpAsia2	YES	0.9413	1	Entero	20.5937	78.9629	India	South_Asia	Human	H. pylori	Ubiquitous	Human	Tourrette et al., 2024, 10.1038/s41586-024-07991-z from Falush
HEL_AA4372AA_AS	NO	NO	hpAsia2	YES	0.993	1	Entero	35.22	136.56	Japan	East_Asia	Primate	H. pylori	Ubiquitous	Primate	The University of Tokyo
HEL_CA4844AA_AS	NO	NO	hpAsia2	YES	0.9307	1	Entero	28.3949	84.124	Nepal	South_Asia	Human	H. pylori	Ubiquitous	Human	Tourrette et al., 2024, 10.1038/s41586-024-07991-z from Falush
HEL_CA4783AA_AS	NO	NO	hpAsia2	YES	0.9302	1	Entero	4.21048	101.976	Malaysia	Southeast_Asia	Human	H. pylori	Ubiquitous	Human	Tourrette et al., 2024, 10.1038/s41586-024-07991-z from Falush
HEL_CA4791AA_AS	NO	NO	hpAsia2	YES	0.9299	1	Entero	4.21048	101.976	Malaysia	Southeast_Asia	Human	H. pylori	Ubiquitous	Human	Tourrette et al., 2024, 10.1038/s41586-024-07991-z from Falush
HEL_CA4795AA_AS	NO	NO	hpAsia2	YES	0.9293	1	Entero	4.21048	101.976	Malaysia	Southeast_Asia	Human	H. pylori	Ubiquitous	Human	Tourrette et al., 2024, 10.1038/s41586-024-07991-z from Falush
HEL_CA4550AA_AS	NO	NO	hpAsia2	YES	0.9288	1	Entero	20.5937	78.9629	India	South_Asia	Human	H. pylori	Ubiquitous	Human	Tourrette et al., 2024, 10.1038/s41586-024-07991-z from Falush
HEL_CA4823AA_AS	NO	NO	hpAsia2	YES	0.9262	1	Entero	21.9162	95.956	Myanmar	Southeast_Asia	Human	H. pylori	Ubiquitous	Human	Tourrette et al., 2024, 10.1038/s41586-024-07991-z from Falush
HEL_CA4839AA_AS	NO	NO	hpAsia2	YES	0.9243	1	Entero	28.3949	84.124	Nepal	South_Asia	Human	H. pylori	Ubiquitous	Human	Tourrette et al., 2024, 10.1038/s41586-024-07991-z from Falush
HEL_AA0361AA_AS	NO	NO	hpAsia2	YES	0.9216	1	Entero	20.5937	78.9629	India	South_Asia	Human	H. pylori	Ubiquitous	Human	Tourrette et al., 2024, 10.1038/s41586-024-07991-z from Entero database
HEL_CA4812AA_AS	NO	NO	hpAsia2	YES	0.9186	1	Entero	21.9162	95.956	Myanmar	Southeast_Asia	Human	H. pylori	Ubiquitous	Human	Tourrette et al., 2024, 10.1038/s41586-024-07991-z from Falush
HEL_CA4548AA_AS	NO	NO	hpAsia2	YES	0.9184	1	Entero	20.5937	78.9629	India	South_Asia	Human	H. pylori	Ubiquitous	Human	Tourrette et al., 2024, 10.1038/s41586-024-07991-z from Falush
HEL_CA4789AA_AS	NO	NO	hpAsia2	YES	0.9165	1	Entero	4.21048	101.976	Malaysia	Southeast_Asia	Human	H. pylori	Ubiquitous	Human	Tourrette et al., 2024, 10.1038/s41586-024-07991-z from Falush
HEL_CA4546AA_AS	NO	NO	hpAsia2	YES	0.9163	1	Entero	20.5937	78.9629	India	South_Asia	Human	H. pylori	Ubiquitous	Human	Tourrette et al., 2024, 10.1038/s41586-024-07991-z from Falush
HEL_CA4781AA_AS	NO	NO	hpAsia2	YES	0.9157	1	Entero	4.21048	101.976	Malaysia	Southeast_Asia	Human	H. pylori	Ubiquitous	Human	Tourrette et al., 2024, 10.1038/s41586-024-07991-z from Falush
HEL_CA4101AA_AS	NO	NO	hpAsia2	YES	0.9134	1	Entero	23.685	90.3563	Bangladesh	South_Asia	Human	H. pylori	Ubiquitous	Human	Tourrette et al., 2024, 10.1038/s41586-024-07991-z from Falush
HEL_CA4836AA_AS	NO	NO	hpAsia2	YES	0.9107	1	Entero	28.3949	84.124	Nepal	South_Asia	Human	H. pylori	Ubiquitous	Human	Tourrette et al., 2024, 10.1038/s41586-024-07991-z from Falush
HEL_CA4780AA_AS	NO	NO	hpAsia2	YES	0.9087	1	Entero	4.21048	101.976	Malaysia	Southeast_Asia	Human	H. pylori	Ubiquitous	Human	Tourrette et al., 2024, 10.1038/s41586-024-07991-z from Falush
HEL_CA4826AA_AS	NO	NO	hpAsia2	YES	0.9087	1	Entero	21.9162	95.956	Myanmar	Southeast_Asia	Human	H. pylori	Ubiquitous	Human	Tourrette et al., 2024, 10.1038/s41586-024-07991-z from Falush
HEL_CA4820AA_AS	NO	NO	hpAsia2	YES	0.9085	1	Entero	21.9162	95.956	Myanmar	Southeast_Asia	Human	H. pylori	Ubiquitous	Human	Tourrette et al., 2024, 10.1038/s41586-024-07991-z from Falush
HEL_CA4817AA_AS	NO	NO	hpAsia2	YES	0.9082	1	Entero	21.9162	95.956	Myanmar	Southeast_Asia	Human	H. pylori	Ubiquitous	Human	Tourrette et al., 2024, 10.1038/s41586-024-07991-z from Falush
HEL_CA4520AA_AS	NO	NO	hpAsia2	YES	0.9073	1	Entero	20.5937	78.9629	India	South_Asia	Human	H. pylori	Ubiquitous	Human	Tourrette et al., 2024, 10.1038/s41586-024-07991-z from Falush
HEL_CA4811AA_AS	NO	NO	hpAsia2	YES	0.9073	1	Entero	21.9162	95.956	Myanmar	Southeast_Asia	Human	H. pylori	Ubiquitous	Human	Tourrette et al., 2024, 10.1038/s41586-024-07991-z from Falush
HEL_CA4818AA_AS	NO	NO	hpAsia2	YES	0.9073	1	Entero	21.9162	95.956	Myanmar	Southeast_Asia	Human	H. pylori	Ubiquitous	Human	Tourrette et al., 2024, 10.1038/s41586-024-07991-z from Falush
HEL_CA4809AA_AS	NO	NO	hpAsia2	YES	0.9061	1	Entero	21.9162	95.956	Myanmar	Southeast_Asia	Human	H. pylori	Ubiquitous	Human	Tourrette et al., 2024, 10.1038/s41586-024-07991-z from Falush
HEL_CA4091AA_AS	NO	NO	hpAsia2	YES	0.905	1	Entero	23.685	90.3563	Bangladesh	South_Asia	Human	H. pylori	Ubiquitous	Human	Tourrette et al., 2024, 10.1038/s41586-024-07991-z from Falush
HEL_CA4106AA_AS	NO	NO	hpAsia2	YES	0.9039	1	Entero	23.685	90.3563	Bangladesh	South_Asia	Human	H. pylori	Ubiquitous	Human	Tourrette et al., 2024, 10.1038/s41586-024-07991-z from Falush
HEL_CA4814AA_AS	NO	NO	hpAsia2	YES	0.902	1	Entero	21.9162	95.956	Myanmar	Southeast_Asia	Human	H. pylori	Ubiquitous	Human	Tourrette et al., 2024, 10.1038/s41586-024-07991-z from Falush
HEL_AA0364AA_AS	NO	NO	hpAsia2	YES	0.9105	2	Entero	20.5937	78.9629	India	South_Asia	Human	H. pylori	Ubiquitous	Human	NCBI
HEL_BA5586AA_AS	NO	NO	hpAsia2	YES	0.9059	14	Entero	4.21048	101.976	Malaysia	Southeast_Asia	Human	H. pylori	Ubiquitous	Human	University of Malaya
HEL_BA8219AA_AS	NO	NO	hpAsia2	YES	0.907	16	Entero	4.21048	101.976	Malaysia	Southeast_Asia	Human	H. pylori	Ubiquitous	Human	University of Malaya
HEL_BA5587AA_AS	NO	NO	hpAsia2	YES	0.9188	20	Entero	4.21048	101.976	Malaysia	Southeast_Asia	Human	H. pylori	Ubiquitous	Human	University of Malaya
HEL_BA8890AA_AS	NO	NO	hpAsia2	YES	0.9101	21	Entero	23.87	90.07	Bangladesh	South_Asia	Human	H. pylori	Ubiquitous	Human	Tourrette et al., 2024, 10.1038/s41586-024-07991-z
GCA_013624245.1	NO	NO	hpAsia2	YES	0.9063	22	NCBI	14.0583	108.277	Vietnam	Southeast_Asia	Human	H. pylori	Ubiquitous	Human	Tourrette et al., 2024, 10.1038/s41586-024-07991-z from NCBI
HEL_BA5601AA_AS	NO	NO	hpAsia2	YES	0.9115	23	Entero	4.21048	101.976	Malaysia	Southeast_Asia	Human	H. pylori	Ubiquitous	Human	University of Malaya
HEL_BA9229AA_AS	NO	NO	hpAsia2	YES	0.9015	24	Entero	13.43	100.31	Thailand	Southeast_Asia	Human	H. pylori	Ubiquitous	Human	Tourrette et al., 2024, 10.1038/s41586-024-07991-z
HEL_CA5971AA_AS	NO	NO	hpAsia2	YES	0.9075	25	Entero	21.9162	95.956	Myanmar	Southeast_Asia	Human	H. pylori	Ubiquitous	Human	Tourrette et al., 2024, 10.1038/s41586-024-07991-z
HEL_CA3244AA_AS	NO	NO	hpAsia2	YES	0.9172	26	Entero	23.685	90.3563	Bangladesh	South_Asia	Human	H. pylori	Ubiquitous	Human	Tourrette et al., 2024, 10.1038/s41586-024-07991-z
HEL_BA5359AA_AS	NO	NO	hpAsia2	YES	0.9139	26	Entero	4.21048	101.976	Malaysia	Southeast_Asia	Human	H. pylori	Ubiquitous	Human	University of Malaya
HEL_CA6489AA_AS	NO	NO	hpAsia2	YES	0.8981	26	Entero	15.87	100.993	Thailand	Southeast_Asia	Human	H. pylori	Ubiquitous	Human	Tourrette et al., 2024, 10.1038/s41586-024-07991-z from Falush
HEL_CA6049AA_AS	NO	NO	hpAsia2	YES	0.8963	26	Entero	21.9162	95.956	Myanmar	Southeast_Asia	Human	H. pylori	Ubiquitous	Human	Tourrette et al., 2024, 10.1038/s41586-024-07991-z from Falush
HEL_BA5603AA_AS	NO	NO	hpAsia2	YES	0.9204	27	Entero	4.21048	101.976	Malaysia	Southeast_Asia	Human	H. pylori	Ubiquitous	Human	University of Malaya
HEL_AA5329AA_AS	NO	NO	hpAsia2	YES	0.9181	27	Entero	1.44	103.64	Singapore	Southeast_Asia	Human	H. pylori	Ubiquitous	Human	National University of Singapore
HEL_CA6117AA_AS	NO	NO	hpAsia2	YES	0.898	27	Entero	28.3949	84.124	Nepal	South_Asia	Human	H. pylori	Ubiquitous	Human	Tourrette et al., 2024, 10.1038/s41586-024-07991-z
HEL_CA5908AA_AS	NO	NO	hpAsia2	YES	0.9238	28	Entero	36.2048	138.253	Japan	East_Asia	Human	H. pylori	Ubiquitous	Human	Tourrette et al., 2024, 10.1038/s41586-024-07991-z
HEL_BA5596AA_AS	NO	NO	hpAsia2	YES	0.9064	28	Entero	4.21048	101.976	Malaysia	Southeast_Asia	Human	H. pylori	Ubiquitous	Human	University of Malaya
HEL_CA3266AA_AS	NO	NO	hpAsia2	YES	0.9044	28	Entero	14.0583	108.277	Vietnam	Southeast_Asia	Human	H. pylori	Ubiquitous	Human	Tourrette et al., 2024, 10.1038/s41586-024-07991-z
GCA_001976105.1	NO	NO	hpAsia2	YES	0.9101	28	NCBI	4.21048	101.976	Malaysia	Southeast_Asia	Human	H. pylori	Ubiquitous	Human	Tourrette et al., 2024, 10.1038/s41586-024-07991-z from NCBI
GCA_013624055.1	NO	NO	hpAsia2	YES	0.8957	28	NCBI	14.0583	108.277	Vietnam	Southeast_Asia	Human	H. pylori	Ubiquitous	Human	Tourrette et al., 2024, 10.1038/s41586-024-07991-z from NCBI
HEL_CA5968AA_AS	NO	NO	hpAsia2	YES	0.9074	29	Entero	21.9162	95.956	Myanmar	Southeast_Asia	Human	H. pylori	Ubiquitous	Human	Tourrette et al., 2024, 10.1038/s41586-024-07991-z
HEL_CA3196AA_AS	NO	NO	hpAsia2	YES	0.9068	29	Entero	23.685	90.3563	Bangladesh	South_Asia	Human	H. pylori	Ubiquitous	Human	Tourrette et al., 2024, 10.1038/s41586-024-07991-z
HEL_CA5897AA_AS	NO	NO	hpAsia2	YES	0.9023	29	Entero	21.9162	95.956	Myanmar	Southeast_Asia	Human	H. pylori	Ubiquitous	Human	Tourrette et al., 2024, 10.1038/s41586-024-07991-z from Falush
HEL_CA5983AA_AS	NO	NO	hpAsia2	YES	0.8989	29	Entero	21.9162	95.956	Myanmar	Southeast_Asia	Human	H. pylori	Ubiquitous	Human	Tourrette et al., 2024, 10.1038/s41586-024-07991-z
GCA_001939635.1	NO	NO	hpAsia2	YES	0.9188	29	NCBI	1.35208	103.82	Singapore	Southeast_Asia	Human	H. pylori	Ubiquitous	Human	Tourrette et al., 2024, 10.1038/s41586-024-07991-z from NCBI
HEL_BA3897AA_AS	NO	NO	hpAsia2	YES	0.8738	30	Entero	-25.2744	133.775	Australia	Oceania	Human	H. pylori	Ubiquitous	Human	Chua et al., 2019, 10.1093/gastro/goy048
HEL_BA5173AA_AS	NO	NO	hpAsia2	YES	0.9114	30	Entero	20.5937	78.9629	India	South_Asia	Human	H. pylori	Ubiquitous	Human	Shetty et al., 2019, 10.1186/s13099-019-0305-x
HEL_CA6031AA_AS	NO	NO	hpAsia2	YES	0.8931	30	Entero	15.87	100.993	Thailand	Southeast_Asia	Human	H. pylori	Ubiquitous	Human	Tourrette et al., 2024, 10.1038/s41586-024-07991-z from Falush
HEL_CA5870AA_AS	NO	NO	hpAsia2	YES	0.8926	30	Entero	21.9162	95.956	Myanmar	Southeast_Asia	Human	H. pylori	Ubiquitous	Human	Tourrette et al., 2024, 10.1038/s41586-024-07991-z
GCA_001976125.1	NO	NO	hpAsia2	YES	0.9134	30	NCBI	4.21048	101.976	Malaysia	Southeast_Asia	Human	H. pylori	Ubiquitous	Human	Tourrette et al., 2024, 10.1038/s41586-024-07991-z from NCBI
GCA_013623975.1	NO	NO	hpAsia2	YES	0.8936	30	NCBI	14.0583	108.277	Vietnam	Southeast_Asia	Human	H. pylori	Ubiquitous	Human	Tourrette et al., 2024, 10.1038/s41586-024-07991-z from NCBI
HEL_CA6061AA_AS	NO	NO	hpAsia2	YES	0.9139	31	Entero	21.9162	95.956	Myanmar	Southeast_Asia	Human	H. pylori	Ubiquitous	Human	Tourrette et al., 2024, 10.1038/s41586-024-07991-z from Falush
HEL_CA3243AA_AS	NO	NO	hpAsia2	YES	0.9056	31	Entero	23.685	90.3563	Bangladesh	South_Asia	Human	H. pylori	Ubiquitous	Human	Tourrette et al., 2024, 10.1038/s41586-024-07991-z
HEL_BA4205AA_AS	NO	NO	hpAsia2	YES	0.8974	31	Entero	-25.2744	133.775	Australia	Oceania	Human	H. pylori	Ubiquitous	Human	Chua et al., 2019, 10.1093/gastro/goy048
HEL_CA6284AA_AS	NO	NO	hpAsia2	YES	0.874	31	Entero	7.87305	80.7718	Sri_Lanka	South_Asia	Human	H. pylori	Ubiquitous	Human	Tourrette et al., 2024, 10.1038/s41586-024-07991-z
HEL_BA5172AA_AS	NO	NO	hpAsia2	YES	0.9042	32	Entero	20.5937	78.9629	India	South_Asia	Human	H. pylori	Ubiquitous	Human	Shetty et al., 2019, 10.1186/s13099-019-0305-x
HEL_BA5168AA_AS	NO	NO	hpAsia2	YES	0.8982	32	Entero	20.5937	78.9629	India	South_Asia	Human	H. pylori	Ubiquitous	Human	Shetty et al., 2019, 10.1186/s13099-019-0305-x
HEL_CA6111AA_AS	NO	NO	hpAsia2	YES	0.8976	32	Entero	28.3949	84.124	Nepal	South_Asia	Human	H. pylori	Ubiquitous	Human	Tourrette et al., 2024, 10.1038/s41586-024-07991-z
HEL_CA3231AA_AS	NO	NO	hpAsia2	YES	0.8975	32	Entero	23.685	90.3563	Bangladesh	South_Asia	Human	H. pylori	Ubiquitous	Human	Tourrette et al., 2024, 10.1038/s41586-024-07991-z
HEL_CA3234AA_AS	NO	NO	hpAsia2	YES	0.9146	33	Entero	23.685	90.3563	Bangladesh	South_Asia	Human	H. pylori	Ubiquitous	Human	Tourrette et al., 2024, 10.1038/s41586-024-07991-z
HEL_CA5969AA_AS	NO	NO	hpAsia2	YES	0.9146	33	Entero	21.9162	95.956	Myanmar	Southeast_Asia	Human	H. pylori	Ubiquitous	Human	Tourrette et al., 2024, 10.1038/s41586-024-07991-z
HEL_BA5182AA_AS	NO	NO	hpAsia2	YES	0.9064	33	Entero	20.5937	78.9629	India	South_Asia	Human	H. pylori	Ubiquitous	Human	Shetty et al., 2019, 10.1186/s13099-019-0305-x
HEL_CA6759AA_AS	NO	NO	hpAsia2	YES	0.9037	33	Entero	21.9162	95.956	Myanmar	Southeast_Asia	Human	H. pylori	Ubiquitous	Human	Tourrette et al., 2024, 10.1038/s41586-024-07991-z
HEL_CA5962AA_AS	NO	NO	hpAsia2	YES	0.9002	33	Entero	21.9162	95.956	Myanmar	Southeast_Asia	Human	H. pylori	Ubiquitous	Human	Tourrette et al., 2024, 10.1038/s41586-024-07991-z
HEL_CA6127AA_AS	NO	NO	hpAsia2	YES	0.9001	33	Entero	28.3949	84.124	Nepal	South_Asia	Human	H. pylori	Ubiquitous	Human	Tourrette et al., 2024, 10.1038/s41586-024-07991-z
HEL_CA6004AA_AS	NO	NO	hpAsia2	YES	0.8916	33	Entero	15.87	100.993	Thailand	Southeast_Asia	Human	H. pylori	Ubiquitous	Human	Tourrette et al., 2024, 10.1038/s41586-024-07991-z
HEL_CA5817AA_AS	NO	NO	hpAsia2	YES	0.8886	33	Entero	15.87	100.993	Thailand	Southeast_Asia	Human	H. pylori	Ubiquitous	Human	Tourrette et al., 2024, 10.1038/s41586-024-07991-z
HEL_BA5164AA_AS	NO	NO	hpAsia2	YES	0.9123	34	Entero	20.5937	78.9629	India	South_Asia	Human	H. pylori	Ubiquitous	Human	Shetty et al., 2019, 10.1186/s13099-019-0305-x
HEL_BA5162AA_AS	NO	NO	hpAsia2	YES	0.9122	34	Entero	20.5937	78.9629	India	South_Asia	Human	H. pylori	Ubiquitous	Human	Shetty et al., 2019, 10.1186/s13099-019-0305-x
HEL_CA6758AA_AS	NO	NO	hpAsia2	YES	0.9111	34	Entero	21.9162	95.956	Myanmar	Southeast_Asia	Human	H. pylori	Ubiquitous	Human	Tourrette et al., 2024, 10.1038/s41586-024-07991-z
HEL_BA7801AA_AS	NO	NO	hpAsia2	YES	0.9096	34	Entero	20.5937	78.9629	India	South_Asia	Human	H. pylori	Ubiquitous	Human	Shetty et al., 2019, 10.1186/s13099-019-0305-x
HEL_CA3672AA_AS	NO	NO	hpAsia2	YES	0.9052	34	Entero	15.87	100.993	Thailand	Southeast_Asia	Human	H. pylori	Ubiquitous	Human	Tourrette et al., 2024, 10.1038/s41586-024-07991-z
HEL_CA0027AA_AS	NO	NO	hpAsia2	YES	0.9048	34	Entero	8.524	76.928	India	South_Asia	Human	H. pylori	Ubiquitous	Human	Mehrotra et al., 2021, 10.1016/j.ygeno.2021.10.002
HEL_CA6115AA_AS	NO	NO	hpAsia2	YES	0.9006	34	Entero	28.3949	84.124	Nepal	South_Asia	Human	H. pylori	Ubiquitous	Human	Tourrette et al., 2024, 10.1038/s41586-024-07991-z
HEL_CA6753AA_AS	NO	NO	hpAsia2	YES	0.9093	35	Entero	21.9162	95.956	Myanmar	Southeast_Asia	Human	H. pylori	Ubiquitous	Human	Tourrette et al., 2024, 10.1038/s41586-024-07991-z
HEL_CA6110AA_AS	NO	NO	hpAsia2	YES	0.9011	35	Entero	28.3949	84.124	Nepal	South_Asia	Human	H. pylori	Ubiquitous	Human	Tourrette et al., 2024, 10.1038/s41586-024-07991-z
HEL_CA6101AA_AS	NO	NO	hpAsia2	YES	0.901	35	Entero	28.3949	84.124	Nepal	South_Asia	Human	H. pylori	Ubiquitous	Human	Tourrette et al., 2024, 10.1038/s41586-024-07991-z
HEL_CA6445AA_AS	NO	NO	hpAsia2	YES	0.8973	35	Entero	15.87	100.993	Thailand	Southeast_Asia	Human	H. pylori	Ubiquitous	Human	Tourrette et al., 2024, 10.1038/s41586-024-07991-z
HEL_CA5992AA_AS	NO	NO	hpAsia2	YES	0.8946	35	Entero	21.9162	95.956	Myanmar	Southeast_Asia	Human	H. pylori	Ubiquitous	Human	Tourrette et al., 2024, 10.1038/s41586-024-07991-z
HEL_CA6054AA_AS	NO	NO	hpAsia2	YES	0.8918	35	Entero	15.87	100.993	Thailand	Southeast_Asia	Human	H. pylori	Ubiquitous	Human	Tourrette et al., 2024, 10.1038/s41586-024-07991-z
GCA_013624155.1	NO	NO	hpAsia2	YES	0.9092	35	NCBI	14.0583	108.277	Vietnam	Southeast_Asia	Human	H. pylori	Ubiquitous	Human	Tourrette et al., 2024, 10.1038/s41586-024-07991-z from NCBI
HEL_BA8387AA_AS	NO	NO	hpAsia2	YES	0.9254	36	Entero	4.21048	101.976	Malaysia	Southeast_Asia	Human	H. pylori	Ubiquitous	Human	Rehvathy et al., 2013, 10.1128/genomeA.00687-13
HEL_CA6122AA_AS	NO	NO	hpAsia2	YES	0.9056	36	Entero	28.3949	84.124	Nepal	South_Asia	Human	H. pylori	Ubiquitous	Human	Tourrette et al., 2024, 10.1038/s41586-024-07991-z
HEL_CA6128AA_AS	NO	NO	hpAsia2	YES	0.8993	36	Entero	28.3949	84.124	Nepal	South_Asia	Human	H. pylori	Ubiquitous	Human	Tourrette et al., 2024, 10.1038/s41586-024-07991-z
HEL_CA5854AA_AS	NO	NO	hpAsia2	YES	0.8989	36	Entero	21.9162	95.956	Myanmar	Southeast_Asia	Human	H. pylori	Ubiquitous	Human	Tourrette et al., 2024, 10.1038/s41586-024-07991-z
HEL_CA3794AA_AS	NO	NO	hpAsia2	YES	0.8914	36	Entero	15.87	100.993	Thailand	Southeast_Asia	Human	H. pylori	Ubiquitous	Human	Tourrette et al., 2024, 10.1038/s41586-024-07991-z
HEL_BA5180AA_AS	NO	NO	hpAsia2	YES	0.9191	37	Entero	20.5937	78.9629	India	South_Asia	Human	H. pylori	Ubiquitous	Human	Shetty et al., 2019, 10.1186/s13099-019-0305-x
HEL_BA9186AA_AS	NO	NO	hpAsia2	YES	0.9104	37	Entero	20.5937	78.9629	India	South_Asia	Primate	H. pylori	Ubiquitous	Primate	Tourrette et al., 2024, 10.1038/s41586-024-07991-z
HEL_BA9638AA_AS	NO	NO	hpAsia2	YES	0.9091	37	Entero	20.5937	78.9629	India	South_Asia	Primate	H. pylori	Ubiquitous	Primate	Tourrette et al., 2024, 10.1038/s41586-024-07991-z
HEL_CA0026AA_AS	NO	NO	hpAsia2	YES	0.903	37	Entero	8.524	76.928	India	South_Asia	Human	H. pylori	Ubiquitous	Human	Mehrotra et al., 2021, 10.1016/j.ygeno.2021.10.002
HEL_CA6741AA_AS	NO	NO	hpAsia2	YES	0.8994	37	Entero	21.9162	95.956	Myanmar	Southeast_Asia	Human	H. pylori	Ubiquitous	Human	Tourrette et al., 2024, 10.1038/s41586-024-07991-z
HEL_CA3538AA_AS	NO	NO	hpAsia2	YES	0.8993	37	Entero	27.5142	90.4336	Bhutan	South_Asia	Human	H. pylori	Ubiquitous	Human	Tourrette et al., 2024, 10.1038/s41586-024-07991-z
HEL_CA6453AA_AS	NO	NO	hpAsia2	YES	0.9209	38	Entero	15.87	100.993	Thailand	Southeast_Asia	Human	H. pylori	Ubiquitous	Human	Tourrette et al., 2024, 10.1038/s41586-024-07991-z
HEL_CA5911AA_AS	NO	NO	hpAsia2	YES	0.9093	38	Entero	21.9162	95.956	Myanmar	Southeast_Asia	Human	H. pylori	Ubiquitous	Human	Tourrette et al., 2024, 10.1038/s41586-024-07991-z
HEL_BA7799AA_AS	NO	NO	hpAsia2	YES	0.9028	38	Entero	20.5937	78.9629	India	South_Asia	Human	H. pylori	Ubiquitous	Human	Shetty et al., 2019, 10.1186/s13099-019-0305-x
HEL_CA6461AA_AS	NO	NO	hpAsia2	YES	0.8976	38	Entero	15.87	100.993	Thailand	Southeast_Asia	Human	H. pylori	Ubiquitous	Human	Tourrette et al., 2024, 10.1038/s41586-024-07991-z
HEL_CA6268AA_AS	NO	NO	hpAsia2	YES	0.8961	38	Entero	15.87	100.993	Thailand	Southeast_Asia	Human	H. pylori	Ubiquitous	Human	Tourrette et al., 2024, 10.1038/s41586-024-07991-z
HEL_AA6014AA_AS	NO	NO	hpAsia2	YES	0.8777	38	Entero	13.43	100.31	Thailand	Southeast_Asia	Human	H. pylori	Ubiquitous	Human	Moodley et al., 2021, 10.1073/pnas.2015523118
HEL_CA5842AA_AS	NO	NO	hpAsia2	YES	0.9037	39	Entero	15.87	100.993	Thailand	Southeast_Asia	Human	H. pylori	Ubiquitous	Human	Tourrette et al., 2024, 10.1038/s41586-024-07991-z
HEL_CA5986AA_AS	NO	NO	hpAsia2	YES	0.8956	39	Entero	21.9162	95.956	Myanmar	Southeast_Asia	Human	H. pylori	Ubiquitous	Human	Tourrette et al., 2024, 10.1038/s41586-024-07991-z
GCA_006440345.1	NO	NO	hpAsia2	YES	0.9125	39	NCBI	14.0583	108.277	Vietnam	Southeast_Asia	Human	H. pylori	Ubiquitous	Human	Tuan et al., 2019, 10.3390/jcm8060858
HEL_CA5827AA_AS	NO	NO	hpAsia2	YES	0.8926	40	Entero	15.87	100.993	Thailand	Southeast_Asia	Human	H. pylori	Ubiquitous	Human	Tourrette et al., 2024, 10.1038/s41586-024-07991-z
HEL_CA6772AA_AS	NO	NO	hpAsia2	YES	0.9102	40	Entero	21.9162	95.956	Myanmar	Southeast_Asia	Human	H. pylori	Ubiquitous	Human	Tourrette et al., 2024, 10.1038/s41586-024-07991-z
HEL_BA5155AA_AS	NO	NO	hpAsia2	YES	0.905	40	Entero	20.5937	78.9629	India	South_Asia	Human	H. pylori	Ubiquitous	Human	Shetty et al., 2019, 10.1186/s13099-019-0305-x
HEL_CA6150AA_AS	NO	NO	hpAsia2	YES	0.9018	40	Entero	28.3949	84.124	Nepal	South_Asia	Human	H. pylori	Ubiquitous	Human	Tourrette et al., 2024, 10.1038/s41586-024-07991-z
HEL_CA6752AA_AS	NO	NO	hpAsia2	YES	0.8938	40	Entero	21.9162	95.956	Myanmar	Southeast_Asia	Human	H. pylori	Ubiquitous	Human	Tourrette et al., 2024, 10.1038/s41586-024-07991-z
GCA_013624275.1	NO	NO	hpAsia2	YES	0.9081	40	NCBI	14.0583	108.277	Vietnam	Southeast_Asia	Human	H. pylori	Ubiquitous	Human	Tourrette et al., 2024, 10.1038/s41586-024-07991-z from NCBI
GCA_006438625.1	NO	NO	hpAsia2	YES	0.9047	40	NCBI	14.0583	108.277	Vietnam	Southeast_Asia	Human	H. pylori	Ubiquitous	Human	Tuan et al., 2019, 10.3390/jcm8060858
GCA_013623955.1	NO	NO	hpAsia2	YES	0.8998	40	NCBI	14.0583	108.277	Vietnam	Southeast_Asia	Human	H. pylori	Ubiquitous	Human	Tourrette et al., 2024, 10.1038/s41586-024-07991-z from NCBI
HEL_CA6439AA_AS	NO	NO	hpAsia2	YES	0.9175	41	Entero	15.87	100.993	Thailand	Southeast_Asia	Human	H. pylori	Ubiquitous	Human	Tourrette et al., 2024, 10.1038/s41586-024-07991-z
HEL_CA6162AA_AS	NO	NO	hpAsia2	YES	0.9163	41	Entero	28.3949	84.124	Nepal	South_Asia	Human	H. pylori	Ubiquitous	Human	Tourrette et al., 2024, 10.1038/s41586-024-07991-z
HEL_CA6291AA_AS	NO	NO	hpAsia2	YES	0.904	41	Entero	7.87305	80.7718	Sri_Lanka	South_Asia	Human	H. pylori	Ubiquitous	Human	Tourrette et al., 2024, 10.1038/s41586-024-07991-z
HEL_CA5892AA_AS	NO	NO	hpAsia2	YES	0.9027	41	Entero	21.9162	95.956	Myanmar	Southeast_Asia	Human	H. pylori	Ubiquitous	Human	Tourrette et al., 2024, 10.1038/s41586-024-07991-z
HEL_CA5947AA_AS	NO	NO	hpAsia2	YES	0.8994	41	Entero	21.9162	95.956	Myanmar	Southeast_Asia	Human	H. pylori	Ubiquitous	Human	Tourrette et al., 2024, 10.1038/s41586-024-07991-z
GCA_013624315.1	NO	NO	hpAsia2	YES	0.9194	41	NCBI	14.0583	108.277	Vietnam	Southeast_Asia	Human	H. pylori	Ubiquitous	Human	Tourrette et al., 2024, 10.1038/s41586-024-07991-z from NCBI
HEL_BA5166AA_AS	NO	NO	hpAsia2	YES	0.91	42	Entero	20.5937	78.9629	India	South_Asia	Human	H. pylori	Ubiquitous	Human	Shetty et al., 2019, 10.1186/s13099-019-0305-x
HEL_CA6109AA_AS	NO	NO	hpAsia2	YES	0.9023	42	Entero	28.3949	84.124	Nepal	South_Asia	Human	H. pylori	Ubiquitous	Human	Tourrette et al., 2024, 10.1038/s41586-024-07991-z
HEL_CA3297AA_AS	NO	NO	hpAsia2	YES	0.9001	42	Entero	27.5142	90.4336	Bhutan	South_Asia	Human	H. pylori	Ubiquitous	Human	Tourrette et al., 2024, 10.1038/s41586-024-07991-z
HEL_CA5978AA_AS	NO	NO	hpAsia2	YES	0.8923	42	Entero	21.9162	95.956	Myanmar	Southeast_Asia	Human	H. pylori	Ubiquitous	Human	Tourrette et al., 2024, 10.1038/s41586-024-07991-z
HEL_CA0034AA_AS	NO	NO	hpAsia2	YES	0.8765	42	Entero	8.524	76.928	India	South_Asia	Human	H. pylori	Ubiquitous	Human	Mehrotra et al., 2021, 10.1016/j.ygeno.2021.10.002
GCA_006439715.1	NO	NO	hpAsia2	YES	0.8983	42	NCBI	14.0583	108.277	Vietnam	Southeast_Asia	Human	H. pylori	Ubiquitous	Human	Tuan et al., 2019, 10.3390/jcm8060858
GCA_013624135.1	NO	NO	hpAsia2	YES	0.9193	42	NCBI	14.0583	108.277	Vietnam	Southeast_Asia	Human	H. pylori	Ubiquitous	Human	Tourrette et al., 2024, 10.1038/s41586-024-07991-z from NCBI
HEL_CA6473AA_AS	NO	NO	hpAsia2	YES	0.8949	43	Entero	15.87	100.993	Thailand	Southeast_Asia	Human	H. pylori	Ubiquitous	Human	Tourrette et al., 2024, 10.1038/s41586-024-07991-z
HEL_CA3245AA_AS	NO	NO	hpAsia2	YES	0.9078	43	Entero	23.685	90.3563	Bangladesh	South_Asia	Human	H. pylori	Ubiquitous	Human	Tourrette et al., 2024, 10.1038/s41586-024-07991-z
HEL_CA6114AA_AS	NO	NO	hpAsia2	YES	0.9064	43	Entero	28.3949	84.124	Nepal	South_Asia	Human	H. pylori	Ubiquitous	Human	Tourrette et al., 2024, 10.1038/s41586-024-07991-z
HEL_CA5513AA_AS	NO	NO	hpAsia2	YES	0.9051	43	Entero	-0.78928	113.921	Indonesia	Southeast_Asia	Human	H. pylori	Ubiquitous	Human	Tourrette et al., 2024, 10.1038/s41586-024-07991-z
HEL_CA6113AA_AS	NO	NO	hpAsia2	YES	0.9038	43	Entero	28.3949	84.124	Nepal	South_Asia	Human	H. pylori	Ubiquitous	Human	Tourrette et al., 2024, 10.1038/s41586-024-07991-z
HEL_CA6119AA_AS	NO	NO	hpAsia2	YES	0.9016	43	Entero	28.3949	84.124	Nepal	South_Asia	Human	H. pylori	Ubiquitous	Human	Tourrette et al., 2024, 10.1038/s41586-024-07991-z
HEL_CA5980AA_AS	NO	NO	hpAsia2	YES	0.9013	43	Entero	21.9162	95.956	Myanmar	Southeast_Asia	Human	H. pylori	Ubiquitous	Human	Tourrette et al., 2024, 10.1038/s41586-024-07991-z
GCA_006440095.1	NO	NO	hpAsia2	YES	0.903	43	NCBI	14.0583	108.277	Vietnam	Southeast_Asia	Human	H. pylori	Ubiquitous	Human	Tuan et al., 2019, 10.3390/jcm8060858
GCA_013624035.1	NO	NO	hpAsia2	YES	0.8922	43	NCBI	14.0583	108.277	Vietnam	Southeast_Asia	Human	H. pylori	Ubiquitous	Human	Tourrette et al., 2024, 10.1038/s41586-024-07991-z from NCBI
HEL_BA5769AA_AS	NO	NO	hpAsia2	YES	0.9255	44	Entero	4.21048	101.976	Malaysia	Southeast_Asia	Human	H. pylori	Ubiquitous	Human	Rehvathy et al., 2013, 10.1128/genomeA.00687-13
HEL_CA5989AA_AS	NO	NO	hpAsia2	YES	0.8991	44	Entero	21.9162	95.956	Myanmar	Southeast_Asia	Human	H. pylori	Ubiquitous	Human	Tourrette et al., 2024, 10.1038/s41586-024-07991-z
HEL_CA3159AA_AS	NO	NO	hpAsia2	YES	0.8986	44	Entero	23.685	90.3563	Bangladesh	South_Asia	Human	H. pylori	Ubiquitous	Human	Tourrette et al., 2024, 10.1038/s41586-024-07991-z
HEL_CA6447AA_AS	NO	NO	hpAsia2	YES	0.8936	44	Entero	15.87	100.993	Thailand	Southeast_Asia	Human	H. pylori	Ubiquitous	Human	Tourrette et al., 2024, 10.1038/s41586-024-07991-z
HEL_CA6527AA_AS	NO	NO	hpAsia2	YES	0.8896	45	Entero	15.87	100.993	Thailand	Southeast_Asia	Human	H. pylori	Ubiquitous	Human	Tourrette et al., 2024, 10.1038/s41586-024-07991-z
HEL_CA6777AA_AS	NO	NO	hpAsia2	YES	0.9109	45	Entero	21.9162	95.956	Myanmar	Southeast_Asia	Human	H. pylori	Ubiquitous	Human	Tourrette et al., 2024, 10.1038/s41586-024-07991-z
HEL_BA3985AA_AS	NO	NO	hpAsia2	YES	0.9002	45	Entero	47.3667	8.55	Switzerland	Europe	Human	H. pylori	Ubiquitous	Human	University Hospital Basel
HEL_CA5887AA_AS	NO	NO	hpAsia2	YES	0.8992	45	Entero	21.9162	95.956	Myanmar	Southeast_Asia	Human	H. pylori	Ubiquitous	Human	Tourrette et al., 2024, 10.1038/s41586-024-07991-z from Falush
HEL_CA6063AA_AS	NO	NO	hpAsia2	YES	0.899	45	Entero	21.9162	95.956	Myanmar	Southeast_Asia	Human	H. pylori	Ubiquitous	Human	Tourrette et al., 2024, 10.1038/s41586-024-07991-z from Falush
HEL_CA5821AA_AS	NO	NO	hpAsia2	YES	0.896	45	Entero	15.87	100.993	Thailand	Southeast_Asia	Human	H. pylori	Ubiquitous	Human	Tourrette et al., 2024, 10.1038/s41586-024-07991-z
HEL_BA4975AA_AS	NO	NO	hpAsia2	YES	0.9151	46	Entero	-25.2744	133.775	Australia	Oceania	Human	H. pylori	Ubiquitous	Human	Chua et al., 2019, 10.1093/gastro/goy048
HEL_CA5855AA_AS	NO	NO	hpAsia2	YES	0.9124	46	Entero	15.87	100.993	Thailand	Southeast_Asia	Human	H. pylori	Ubiquitous	Human	Tourrette et al., 2024, 10.1038/s41586-024-07991-z
HEL_CA3284AA_AS	NO	NO	hpAsia2	YES	0.9031	46	Entero	27.5142	90.4336	Bhutan	South_Asia	Human	H. pylori	Ubiquitous	Human	Tourrette et al., 2024, 10.1038/s41586-024-07991-z
HEL_CA3285AA_AS	NO	NO	hpAsia2	YES	0.8787	46	Entero	27.5142	90.4336	Bhutan	South_Asia	Human	H. pylori	Ubiquitous	Human	Tourrette et al., 2024, 10.1038/s41586-024-07991-z
HEL_CA6103AA_AS	NO	NO	hpAsia2	YES	0.9015	46	Entero	28.3949	84.124	Nepal	South_Asia	Human	H. pylori	Ubiquitous	Human	Tourrette et al., 2024, 10.1038/s41586-024-07991-z
HEL_CA6015AA_AS	NO	NO	hpAsia2	YES	0.894	46	Entero	15.87	100.993	Thailand	Southeast_Asia	Human	H. pylori	Ubiquitous	Human	Tourrette et al., 2024, 10.1038/s41586-024-07991-z
HEL_CA6147AA_AS	NO	NO	hpAsia2	YES	0.9165	47	Entero	28.3949	84.124	Nepal	South_Asia	Human	H. pylori	Ubiquitous	Human	Tourrette et al., 2024, 10.1038/s41586-024-07991-z
HEL_CA5836AA_AS	NO	NO	hpAsia2	YES	0.9025	47	Entero	15.87	100.993	Thailand	Southeast_Asia	Human	H. pylori	Ubiquitous	Human	Tourrette et al., 2024, 10.1038/s41586-024-07991-z
HEL_CA6718AA_AS	NO	NO	hpAsia2	YES	0.8981	47	Entero	21.9162	95.956	Myanmar	Southeast_Asia	Human	H. pylori	Ubiquitous	Human	Tourrette et al., 2024, 10.1038/s41586-024-07991-z
HEL_CA6499AA_AS	NO	NO	hpAsia2	YES	0.9101	48	Entero	15.87	100.993	Thailand	Southeast_Asia	Human	H. pylori	Ubiquitous	Human	Tourrette et al., 2024, 10.1038/s41586-024-07991-z
HEL_CA6154AA_AS	NO	NO	hpAsia2	YES	0.9028	48	Entero	28.3949	84.124	Nepal	South_Asia	Human	H. pylori	Ubiquitous	Human	Tourrette et al., 2024, 10.1038/s41586-024-07991-z
HEL_CA4135AA_AS	NO	NO	hpAsia2	YES	0.8991	48	Entero	23.685	90.3563	Bangladesh	South_Asia	Human	H. pylori	Ubiquitous	Human	Tourrette et al., 2024, 10.1038/s41586-024-07991-z
HEL_CA6269AA_AS	NO	NO	hpAsia2	YES	0.8962	48	Entero	15.87	100.993	Thailand	Southeast_Asia	Human	H. pylori	Ubiquitous	Human	Tourrette et al., 2024, 10.1038/s41586-024-07991-z
HEL_CA3232AA_AS	NO	NO	hpAsia2	YES	0.8919	48	Entero	23.685	90.3563	Bangladesh	South_Asia	Human	H. pylori	Ubiquitous	Human	Tourrette et al., 2024, 10.1038/s41586-024-07991-z
HEL_CA6112AA_AS	NO	NO	hpAsia2	YES	0.9065	49	Entero	28.3949	84.124	Nepal	South_Asia	Human	H. pylori	Ubiquitous	Human	Tourrette et al., 2024, 10.1038/s41586-024-07991-z
GCA_006439915.1	NO	NO	hpAsia2	YES	0.9094	49	NCBI	14.0583	108.277	Vietnam	Southeast_Asia	Human	H. pylori	Ubiquitous	Human	Tuan et al., 2019, 10.3390/jcm8060858
GCA_013624065.1	NO	NO	hpAsia2	YES	0.9029	49	NCBI	14.0583	108.277	Vietnam	Southeast_Asia	Human	H. pylori	Ubiquitous	Human	Tourrette et al., 2024, 10.1038/s41586-024-07991-z from NCBI
GCA_006439735.1	NO	NO	hpAsia2	YES	0.8868	49	NCBI	14.0583	108.277	Vietnam	Southeast_Asia	Human	H. pylori	Ubiquitous	Human	Tuan et al., 2019, 10.3390/jcm8060858
HEL_CA3237AA_AS	NO	NO	hpAsia2	YES	0.918	51	Entero	23.685	90.3563	Bangladesh	South_Asia	Human	H. pylori	Ubiquitous	Human	Tourrette et al., 2024, 10.1038/s41586-024-07991-z
HEL_CA6761AA_AS	NO	NO	hpAsia2	YES	0.9022	51	Entero	21.9162	95.956	Myanmar	Southeast_Asia	Human	H. pylori	Ubiquitous	Human	Tourrette et al., 2024, 10.1038/s41586-024-07991-z
HEL_CA5981AA_AS	NO	NO	hpAsia2	YES	0.8986	51	Entero	21.9162	95.956	Myanmar	Southeast_Asia	Human	H. pylori	Ubiquitous	Human	Tourrette et al., 2024, 10.1038/s41586-024-07991-z
HEL_CA5985AA_AS	NO	NO	hpAsia2	YES	0.8944	51	Entero	21.9162	95.956	Myanmar	Southeast_Asia	Human	H. pylori	Ubiquitous	Human	Tourrette et al., 2024, 10.1038/s41586-024-07991-z
HEL_CA6285AA_AS	NO	NO	hpAsia2	YES	0.8917	51	Entero	7.87305	80.7718	Sri_Lanka	South_Asia	Human	H. pylori	Ubiquitous	Human	Tourrette et al., 2024, 10.1038/s41586-024-07991-z
HEL_CA3242AA_AS	NO	NO	hpAsia2	YES	0.9065	52	Entero	23.685	90.3563	Bangladesh	South_Asia	Human	H. pylori	Ubiquitous	Human	Tourrette et al., 2024, 10.1038/s41586-024-07991-z
HEL_CA3445AA_AS	NO	NO	hpAsia2	YES	0.8993	52	Entero	27.5142	90.4336	Bhutan	South_Asia	Human	H. pylori	Ubiquitous	Human	Tourrette et al., 2024, 10.1038/s41586-024-07991-z
HEL_CA5982AA_AS	NO	NO	hpAsia2	YES	0.893	52	Entero	21.9162	95.956	Myanmar	Southeast_Asia	Human	H. pylori	Ubiquitous	Human	Tourrette et al., 2024, 10.1038/s41586-024-07991-z
HEL_CA6485AA_AS	NO	NO	hpAsia2	YES	0.8922	52	Entero	15.87	100.993	Thailand	Southeast_Asia	Human	H. pylori	Ubiquitous	Human	Tourrette et al., 2024, 10.1038/s41586-024-07991-z
HEL_CA3295AA_AS	NO	NO	hpAsia2	YES	0.8949	53	Entero	27.5142	90.4336	Bhutan	South_Asia	Human	H. pylori	Ubiquitous	Human	Tourrette et al., 2024, 10.1038/s41586-024-07991-z
HEL_CA6130AA_AS	NO	NO	hpAsia2	YES	0.8967	55	Entero	28.3949	84.124	Nepal	South_Asia	Human	H. pylori	Ubiquitous	Human	Tourrette et al., 2024, 10.1038/s41586-024-07991-z
HEL_CA6775AA_AS	NO	NO	hpAsia2	YES	0.903	55	Entero	21.9162	95.956	Myanmar	Southeast_Asia	Human	H. pylori	Ubiquitous	Human	Tourrette et al., 2024, 10.1038/s41586-024-07991-z
HEL_CA0029AA_AS	NO	NO	hpAsia2	YES	0.8848	55	Entero	8.524	76.928	India	South_Asia	Human	H. pylori	Ubiquitous	Human	Mehrotra et al., 2021, 10.1016/j.ygeno.2021.10.002
HEL_AA6079AA_AS	NO	NO	hpAsia2	YES	0.9117	56	Entero	13.43	100.31	Thailand	Southeast_Asia	Human	H. pylori	Ubiquitous	Human	MLST sequence published in Linz et al., 2007, 10.1038/nature05562
HEL_CA3205AA_AS	NO	NO	hpAsia2	YES	0.9043	56	Entero	23.685	90.3563	Bangladesh	South_Asia	Human	H. pylori	Ubiquitous	Human	Tourrette et al., 2024, 10.1038/s41586-024-07991-z
HEL_CA3161AA_AS	NO	NO	hpAsia2	YES	0.9021	56	Entero	23.685	90.3563	Bangladesh	South_Asia	Human	H. pylori	Ubiquitous	Human	Tourrette et al., 2024, 10.1038/s41586-024-07991-z
HEL_CA6463AA_AS	NO	NO	hpAsia2	YES	0.8969	56	Entero	15.87	100.993	Thailand	Southeast_Asia	Human	H. pylori	Ubiquitous	Human	Tourrette et al., 2024, 10.1038/s41586-024-07991-z
HEL_CA6017AA_AS	NO	NO	hpAsia2	YES	0.9017	57	Entero	15.87	100.993	Thailand	Southeast_Asia	Human	H. pylori	Ubiquitous	Human	Tourrette et al., 2024, 10.1038/s41586-024-07991-z
HEL_CA6466AA_AS	NO	NO	hpAsia2	YES	0.8977	57	Entero	15.87	100.993	Thailand	Southeast_Asia	Human	H. pylori	Ubiquitous	Human	Tourrette et al., 2024, 10.1038/s41586-024-07991-z
HEL_BA8204AA_AS	NO	NO	hpAsia2	YES	0.9099	58	Entero	4.21048	101.976	Malaysia	Southeast_Asia	Human	H. pylori	Ubiquitous	Human	University of Malaya
HEL_CA6016AA_AS	NO	NO	hpAsia2	YES	0.9008	58	Entero	15.87	100.993	Thailand	Southeast_Asia	Human	H. pylori	Ubiquitous	Human	Tourrette et al., 2024, 10.1038/s41586-024-07991-z
HEL_CA6434AA_AS	NO	NO	hpAsia2	YES	0.888	58	Entero	15.87	100.993	Thailand	Southeast_Asia	Human	H. pylori	Ubiquitous	Human	Tourrette et al., 2024, 10.1038/s41586-024-07991-z
HEL_CA3692AA_AS	NO	NO	hpAsia2	YES	0.9028	59	Entero	15.87	100.993	Thailand	Southeast_Asia	Human	H. pylori	Ubiquitous	Human	Tourrette et al., 2024, 10.1038/s41586-024-07991-z
HEL_CA6446AA_AS	NO	NO	hpAsia2	YES	0.8972	59	Entero	15.87	100.993	Thailand	Southeast_Asia	Human	H. pylori	Ubiquitous	Human	Tourrette et al., 2024, 10.1038/s41586-024-07991-z
HEL_CA5878AA_AS	NO	NO	hpAsia2	YES	0.8971	59	Entero	21.9162	95.956	Myanmar	Southeast_Asia	Human	H. pylori	Ubiquitous	Human	Tourrette et al., 2024, 10.1038/s41586-024-07991-z
HEL_CA4420AA_AS	NO	NO	hpAsia2	YES	0.876	60	Entero	27.5142	90.4336	Bhutan	South_Asia	Human	H. pylori	Ubiquitous	Human	Tourrette et al., 2024, 10.1038/s41586-024-07991-z
HEL_CA0037AA_AS	NO	NO	hpAsia2	YES	0.9	60	Entero	8.524	76.928	India	South_Asia	Human	H. pylori	Ubiquitous	Human	Mehrotra et al., 2021, 10.1016/j.ygeno.2021.10.002
HEL_CA5987AA_AS	NO	NO	hpAsia2	YES	0.8945	60	Entero	21.9162	95.956	Myanmar	Southeast_Asia	Human	H. pylori	Ubiquitous	Human	Tourrette et al., 2024, 10.1038/s41586-024-07991-z
HEL_CA3500AA_AS	NO	NO	hpAsia2	YES	0.9003	62	Entero	27.5142	90.4336	Bhutan	South_Asia	Human	H. pylori	Ubiquitous	Human	Tourrette et al., 2024, 10.1038/s41586-024-07991-z
HEL_BA5668AA_AS	NO	NO	hpAsia2	YES	0.916	62	Entero	-30.5595	22.9375	South_Africa	Africa	Human	H. pylori	Ubiquitous	Human	Didelot et al., 2013, 10.1073/pnas.1304681110
HEL_CA4154AA_AS	NO	NO	hpAsia2	YES	0.8989	63	Entero	23.685	90.3563	Bangladesh	South_Asia	Human	H. pylori	Ubiquitous	Human	Tourrette et al., 2024, 10.1038/s41586-024-07991-z
HEL_CA6039AA_AS	NO	NO	hpAsia2	YES	0.8924	63	Entero	13.43	100.31	Thailand	Southeast_Asia	Human	H. pylori	Ubiquitous	Human	Tourrette et al., 2024, 10.1038/s41586-024-07991-z from Falush
HEL_CA3177AA_AS	NO	NO	hpAsia2	YES	0.892	63	Entero	23.685	90.3563	Bangladesh	South_Asia	Human	H. pylori	Ubiquitous	Human	Tourrette et al., 2024, 10.1038/s41586-024-07991-z
HEL_CA3254AA_AS	NO	NO	hpAsia2	YES	0.9061	64	Entero	23.87	90.07	Bangladesh	South_Asia	Human	H. pylori	Ubiquitous	Human	Tourrette et al., 2024, 10.1038/s41586-024-07991-z from Falush
HEL_CA6131AA_AS	NO	NO	hpAsia2	YES	0.8976	66	Entero	28.3949	84.124	Nepal	South_Asia	Human	H. pylori	Ubiquitous	Human	Tourrette et al., 2024, 10.1038/s41586-024-07991-z
HEL_AA6074AA_AS	NO	NO	hpAsia2	YES	0.897	66	Entero	1.2	103.5	Singapore	Southeast_Asia	Human	H. pylori	Ubiquitous	Human	Moodley et al., 2021, 10.1073/pnas.2015523118
HEL_CA5979AA_AS	NO	NO	hpAsia2	YES	0.8949	67	Entero	21.9162	95.956	Myanmar	Southeast_Asia	Human	H. pylori	Ubiquitous	Human	Tourrette et al., 2024, 10.1038/s41586-024-07991-z
HEL_CA3239AA_AS	NO	NO	hpAsia2	YES	0.904	68	Entero	23.685	90.3563	Bangladesh	South_Asia	Human	H. pylori	Ubiquitous	Human	Tourrette et al., 2024, 10.1038/s41586-024-07991-z
HEL_CA5158AA_AS	NO	NO	hpAsia2	YES	0.8941	69	Entero	14.0583	108.277	Vietnam	Southeast_Asia	Human	H. pylori	Ubiquitous	Human	Tourrette et al., 2024, 10.1038/s41586-024-07991-z
HEL_CA5965AA_AS	NO	NO	hpAsia2	YES	0.8888	70	Entero	21.9162	95.956	Myanmar	Southeast_Asia	Human	H. pylori	Ubiquitous	Human	Tourrette et al., 2024, 10.1038/s41586-024-07991-z
HEL_CA6029AA_AS	NO	NO	hpAsia2	YES	0.9081	71	Entero	15.87	100.993	Thailand	Southeast_Asia	Human	H. pylori	Ubiquitous	Human	Tourrette et al., 2024, 10.1038/s41586-024-07991-z
HEL_CA5996AA_AS	NO	NO	hpAsia2	YES	0.9011	72	Entero	21.9162	95.956	Myanmar	Southeast_Asia	Human	H. pylori	Ubiquitous	Human	Tourrette et al., 2024, 10.1038/s41586-024-07991-z
HEL_CA6271AA_AS	NO	NO	hpAsia2	YES	0.902	79	Entero	15.87	100.993	Thailand	Southeast_Asia	Human	H. pylori	Ubiquitous	Human	Tourrette et al., 2024, 10.1038/s41586-024-07991-z
HEL_BA8068AA_AS	NO	NO	hpAsia2	YES	0.9151	81	Entero	4.21048	101.976	Malaysia	Southeast_Asia	Human	H. pylori	Ubiquitous	Human	Rehvathy et al., 2013, 10.1128/genomeA.00687-13
HEL_BA8057AA_AS	NO	NO	hpAsia2	YES	0.8905	81	Entero	4.21048	101.976	Malaysia	Southeast_Asia	Human	H. pylori	Ubiquitous	Human	Kumar et al., 2015, 10.1093/nar/gku1271
HEL_CA6756AA_AS	NO	NO	hpAsia2	YES	0.8732	81	Entero	21.9162	95.956	Myanmar	Southeast_Asia	Human	H. pylori	Ubiquitous	Human	Tourrette et al., 2024, 10.1038/s41586-024-07991-z
HEL_CA6045AA_AS	NO	NO	hpAsia2	YES	0.9088	83	Entero	13.43	100.31	Thailand	Southeast_Asia	Human	H. pylori	Ubiquitous	Human	Tourrette et al., 2024, 10.1038/s41586-024-07991-z from Falush
HEL_CA3186AA_AS	NO	NO	hpAsia2	YES	0.9019	83	Entero	23.685	90.3563	Bangladesh	South_Asia	Human	H. pylori	Ubiquitous	Human	Tourrette et al., 2024, 10.1038/s41586-024-07991-z
HEL_CA3238AA_AS	NO	NO	hpAsia2	YES	0.9022	84	Entero	23.685	90.3563	Bangladesh	South_Asia	Human	H. pylori	Ubiquitous	Human	Tourrette et al., 2024, 10.1038/s41586-024-07991-z
HEL_CA5689AA_AS	NO	NO	hpAsia2	YES	0.8977	84	Entero	-0.78928	113.921	Indonesia	Southeast_Asia	Human	H. pylori	Ubiquitous	Human	Tourrette et al., 2024, 10.1038/s41586-024-07991-z
HEL_CA6432AA_AS	NO	NO	hpAsia2	YES	0.8915	87	Entero	15.87	100.993	Thailand	Southeast_Asia	Human	H. pylori	Ubiquitous	Human	Tourrette et al., 2024, 10.1038/s41586-024-07991-z
HEL_CA6509AA_AS	NO	NO	hpAsia2	YES	0.8891	87	Entero	15.87	100.993	Thailand	Southeast_Asia	Human	H. pylori	Ubiquitous	Human	Tourrette et al., 2024, 10.1038/s41586-024-07991-z
HEL_BA5450AA_AS	NO	NO	hpAsia2	YES	0.9004	88	Entero	4.21048	101.976	Malaysia	Southeast_Asia	Human	H. pylori	Ubiquitous	Human	Rehvathy et al., 2013, 10.1128/genomeA.00687-13
HEL_AA7391AA_AS	NO	NO	hpAsia2	YES	0.8884	97	Entero	33	74	India	South_Asia	Human	H. pylori	Ubiquitous	Human	Tourrette et al., 2024, 10.1038/s41586-024-07991-z
HEL_CA3249AA_AS	NO	NO	hpAsia2	YES	0.8867	98	Entero	23.87	90.07	Bangladesh	South_Asia	Human	H. pylori	Ubiquitous	Human	Tourrette et al., 2024, 10.1038/s41586-024-07991-z from Falush
HEL_BA8121AA_AS	NO	NO	hpAsia2	YES	0.892	107	Entero	20.5937	78.9629	India	South_Asia	Human	H. pylori	Ubiquitous	Human	Kumar et al., 2012, 10.1128/JB.01371-12
HEL_CA5995AA_AS	NO	NO	hpAsia2	YES	0.9145	108	Entero	21.9162	95.956	Myanmar	Southeast_Asia	Human	H. pylori	Ubiquitous	Human	Tourrette et al., 2024, 10.1038/s41586-024-07991-z
HEL_BA8096AA_AS	NO	NO	hpAsia2	YES	0.9007	115	Entero	4.21048	101.976	Malaysia	Southeast_Asia	Human	H. pylori	Ubiquitous	Human	Rehvathy et al., 2013, 10.1128/genomeA.00687-13
HEL_CA3218AA_AS	NO	NO	hpAsia2	YES	0.9259	121	Entero	23.685	90.3563	Bangladesh	South_Asia	Human	H. pylori	Ubiquitous	Human	Tourrette et al., 2024, 10.1038/s41586-024-07991-z
HEL_BA5455AA_AS	NO	NO	hpAsia2	YES	0.8997	129	Entero	4.21048	101.976	Malaysia	Southeast_Asia	Human	H. pylori	Ubiquitous	Human	Rehvathy et al., 2013, 10.1128/genomeA.00687-13
HEL_CA3707AA_AS	NO	NO	hpAsia2	YES	0.9035	146	Entero	15.87	100.993	Thailand	Southeast_Asia	Human	H. pylori	Ubiquitous	Human	Tourrette et al., 2024, 10.1038/s41586-024-07991-z
HEL_CA3693AA_AS	NO	NO	hpAsia2	YES	0.9058	220	Entero	15.87	100.993	Thailand	Southeast_Asia	Human	H. pylori	Ubiquitous	Human	Tourrette et al., 2024, 10.1038/s41586-024-07991-z
GCA_024409265.1	NO	NO	hpAsia2	YES	0.8817	252	NCBI	15.87	100.993	Thailand	Southeast_Asia	Human	H. pylori	Ubiquitous	Human	Thorpe et al., 2022, 10.1038/s41467-022-34475-3
HEL_CA6176AA_AS	NO	NO	hpAsia2	YES	0.9282	272	Entero	28.3949	84.124	Nepal	South_Asia	Human	H. pylori	Ubiquitous	Human	Tourrette et al., 2024, 10.1038/s41586-024-07991-z
GCA_024413715.1	NO	NO	hpAsia2	YES	0.8762	355	NCBI	15.87	100.993	Thailand	Southeast_Asia	Human	H. pylori	Ubiquitous	Human	Thorpe et al., 2022, 10.1038/s41467-022-34475-3
HEL_CA6041AA_AS	NO	NO	hpAsia2	YES	0.8762	356	Entero	15.87	100.993	Thailand	Southeast_Asia	Human	H. pylori	Ubiquitous	Human	Tourrette et al., 2024, 10.1038/s41586-024-07991-z from Falush
HEL_CA5976AA_AS	NO	NO	hpAsia2	YES	0.8902	430	Entero	21.9162	95.956	Myanmar	Southeast_Asia	Human	H. pylori	Ubiquitous	Human	Tourrette et al., 2024, 10.1038/s41586-024-07991-z
HEL_CA6062AA_AS	NO	NO	hpAsia2	YES	0.9144	452	Entero	21.9162	95.956	Myanmar	Southeast_Asia	Human	H. pylori	Ubiquitous	Human	Tourrette et al., 2024, 10.1038/s41586-024-07991-z
HEL_AA5923AA_AS	YES	YES	hpAsia2_Eco	YES	0.8896	101	Entero	33	74	India	South_Asia	Human	H. pylori	hpAsia2_Ecotype	Human	MLST sequence published in Wirth et al., 2004, 10.1073/pnas.0306629101
HEL_AA5954AA_AS	YES	YES	hpAsia2_Eco	YES	0.9166	80	Entero	33	74	India	South_Asia	Human	H. pylori	hpAsia2_Ecotype	Human	MLST sequence published in Wirth et al., 2004, 10.1073/pnas.0306629101
HEL_AA5974AA_AS	YES	YES	hpAsia2_Eco	YES	0.901	59	Entero	33	74	India	South_Asia	Human	H. pylori	hpAsia2_Ecotype	Human	MLST sequence published in Wirth et al., 2004, 10.1073/pnas.0306629101
HEL_AA5977AA_AS	YES	YES	hpAsia2_Eco	YES	0.9169	136	Entero	33	74	India	South_Asia	Human	H. pylori	hpAsia2_Ecotype	Human	MLST sequence published in Falush et al., 2003, 10.1126/science.1080857
HEL_AA6012AA_AS	YES	YES	hpAsia2_Eco	YES	0.9108	50	Entero	33	74	India	South_Asia	Human	H. pylori	hpAsia2_Ecotype	Human	Mark Achtman
HEL_AA6019AA_AS	YES	YES	hpAsia2_Eco	YES	0.899	83	Entero	33	74	India	South_Asia	Human	H. pylori	hpAsia2_Ecotype	Human	MLST sequence published in Falush et al., 2003, 10.1126/science.1080857
HEL_AA6063AA_AS	YES	YES	hpAsia2_Eco	YES	0.9022	114	Entero	33	74	India	South_Asia	Human	H. pylori	hpAsia2_Ecotype	Human	MLST sequence published in Wirth et al., 2004, 10.1073/pnas.0306629101
HEL_AA6086AA_AS	YES	YES	hpAsia2_Eco	YES	0.9091	75	Entero	33	74	India	South_Asia	Human	H. pylori	hpAsia2_Ecotype	Human	MLST sequence published in Falush et al., 2003, 10.1126/science.1080857
HEL_AA7222AA_AS	YES	YES	hpAsia2_Eco	YES	0.9168	67	Entero	33	74	India	South_Asia	Human	H. pylori	hpAsia2_Ecotype	Human	Moodley et al., 2021, 10.1073/pnas.2015523118
HEL_AA7340AA_AS	YES	YES	hpAsia2_Eco	YES	0.9076	54	Entero	33	74	India	South_Asia	Human	H. pylori	hpAsia2_Ecotype	Human	M. Achtman
CB57	NO	YES	hpAsia2_Eco	YES	0.8888	45	LLT	30.67	104.06	China	East_Asia	Human	H. pylori	hpAsia2_Ecotype	Human	Unpublished_data
HEL_AA6043AA_AS	NO	YES	hpAsia2_Eco	YES	0.9118	74	Entero	33	74	India	South_Asia	Human	H. pylori	hpAsia2_Ecotype	Human	MLST sequence published in Falush et al., 2003, 10.1126/science.1080857
HEL_AA6066AA_AS	NO	NO	hpAsia2_Eco	YES	0.9214	65	Entero	33	74	India	South_Asia	Human	H. pylori	hpAsia2_Ecotype	Human	MLST sequence published in Wirth et al., 2004, 10.1073/pnas.0306629101
HEL_BA9314AA_AS	NO	NO	hpAsia2_Eco	YES	0.9062	22	Entero	33	74	India	South_Asia	Human	H. pylori	hpAsia2_Ecotype	Human	Tourrette et al., 2024, 10.1038/s41586-024-07991-z
HEL_BA9741AA_AS	NO	NO	hpAsia2_Eco	YES	0.911	25	Entero	33	74	India	South_Asia	Human	H. pylori	hpAsia2_Ecotype	Human	Tourrette et al., 2024, 10.1038/s41586-024-07991-z
HEL_BA9836AA_AS	NO	NO	hpAsia2_Eco	YES	0.9081	39	Entero	33	74	India	South_Asia	Human	H. pylori	hpAsia2_Ecotype	Human	Tourrette et al., 2024, 10.1038/s41586-024-07991-z
HEL_CA3314AA_AS	NO	NO	hpAsia2_Eco	YES	0.9024	67	Entero	27.5142	90.4336	Bhutan	South_Asia	Human	H. pylori	hpAsia2_Ecotype	Human	Tourrette et al., 2024, 10.1038/s41586-024-07991-z
HEL_CA4837AA_AS	NO	NO	hpAsia2_Eco	YES	0.9266	1	Entero	28.3949	84.124	Nepal	South_Asia	Human	H. pylori	hpAsia2_Ecotype	Human	Tourrette et al., 2024, 10.1038/s41586-024-07991-z from Falush
HEL_CA4840AA_AS	NO	NO	hpAsia2_Eco	YES	0.9154	1	Entero	28.3949	84.124	Nepal	South_Asia	Human	H. pylori	hpAsia2_Ecotype	Human	Tourrette et al., 2024, 10.1038/s41586-024-07991-z from Falush
HEL_AA0320AA_AS	NO	NO	hpAsia2_Eco	YES	0.9027	1	Entero	33	74	India	South_Asia	Human	H. pylori	hpAsia2_Ecotype	Human	Veterinary Medicine University of Vienna
HEL_BA9450AA_AS	NO	NO	hpAsia2_Eco	YES	0.9057	18	Entero	33	74	India	South_Asia	Human	H. pylori	hpAsia2_Ecotype	Human	Tourrette et al., 2024, 10.1038/s41586-024-07991-z
HEL_BA8813AA_AS	NO	NO	hpAsia2_Eco	YES	0.9067	30	Entero	33	74	India	South_Asia	Human	H. pylori	hpAsia2_Ecotype	Human	Tourrette et al., 2024, 10.1038/s41586-024-07991-z
HEL_BA9687AA_AS	NO	NO	hpAsia2_Eco	YES	0.8973	44	Entero	23.87	90.07	Bangladesh	South_Asia	Human	H. pylori	hpAsia2_Ecotype	Human	Tourrette et al., 2024, 10.1038/s41586-024-07991-z
HEL_AA6038AA_AS	NO	NO	hpAsia2_Eco	YES	0.9118	48	Entero	33	74	India	South_Asia	Human	H. pylori	hpAsia2_Ecotype	Human	MLST sequence published in Falush et al., 2003, 10.1126/science.1080857
HEL_AA5950AA_AS	NO	NO	hpAsia2_Eco	YES	0.8987	55	Entero	33	74	India	South_Asia	Human	H. pylori	hpAsia2_Ecotype	Human	Moodley et al., 2021, 10.1073/pnas.2015523118
HEL_AA7242AA_AS	NO	NO	hpAsia2_Eco	YES	0.8921	56	Entero	33	74	India	South_Asia	Human	H. pylori	hpAsia2_Ecotype	Human	Moodley et al., 2021, 10.1073/pnas.2015523118
HEL_AA6033AA_AS	NO	NO	hpAsia2_Eco	YES	0.9095	81	Entero	33	74	India	South_Asia	Human	H. pylori	hpAsia2_Ecotype	Human	MLST sequence published in Wirth et al., 2004, 10.1073/pnas.0306629101
HEL_AA7388AA_AS	NO	NO	hpAsia2_Eco	YES	0.898	82	Entero	33	74	India	South_Asia	Human	H. pylori	hpAsia2_Ecotype	Human	Moodley et al., 2021, 10.1073/pnas.2015523118
HEL_AA5924AA_AS	NO	NO	hpAsia2_Eco	YES	0.909	99	Entero	33	74	India	South_Asia	Human	H. pylori	hpAsia2_Ecotype	Human	MLST sequence published in Wirth et al., 2004, 10.1073/pnas.0306629101
HEL_AA6042AA_AS	NO	NO	hpAsia2_Eco	YES	0.9041	103	Entero	33	74	India	South_Asia	Human	H. pylori	hpAsia2_Ecotype	Human	MLST sequence published in Falush et al., 2003, 10.1126/science.1080857
HEL_AA4493AA_AS	NO	NO	hpAsia2_Eco	YES	0.9028	110	Entero	20.5937	78.9629	India	South_Asia	Human	H. pylori	hpAsia2_Ecotype	Human	WARWICK UNIVERSITY
HEL_AA5926AA_AS	NO	NO	hpAsia2_Eco	YES	0.9062	125	Entero	33	74	India	South_Asia	Human	H. pylori	hpAsia2_Ecotype	Human	MLST sequence published in Wirth et al., 2004, 10.1073/pnas.0306629101
HEL_AA7320AA_AS	NO	NO	hpAsia2_Eco	YES	0.9034	125	Entero	33	74	India	South_Asia	Human	H. pylori	hpAsia2_Ecotype	Human	Mark Achtman
HEL_AA6083AA_AS	NO	NO	hpAsia2_Eco	YES	0.9013	178	Entero	33	74	India	South_Asia	Human	H. pylori	hpAsia2_Ecotype	Human	MLST sequence published in Wirth et al., 2004, 10.1073/pnas.0306629101
HEL_AA5978AA_AS	NO	NO	hpAsia2_Eco	YES	0.9013	188	Entero	33	74	India	South_Asia	Human	H. pylori	hpAsia2_Ecotype	Human	MLST sequence published in Falush et al., 2003, 10.1126/science.1080857
PHI092	YES	YES	hpEurope	YES	0.8196	1	Datadryad	46.2276	2.21375	France	Europe	Human	H. pylori	Ubiquitous	Human	Thorell, Yahara et al., 2017, 10.1371/journal.pgen.1006546
SSR12	YES	YES	hpEurope	YES	0.7938	1	Datadryad	53.7798	-7.30553	Ireland	Europe	Human	H. pylori	Ubiquitous	Human	Thorell, Yahara et al., 2017, 10.1371/journal.pgen.1006546
SSR13	YES	YES	hpEurope	YES	0.8022	1	Datadryad	53.7798	-7.30553	Ireland	Europe	Human	H. pylori	Ubiquitous	Human	Thorell, Yahara et al., 2017, 10.1371/journal.pgen.1006546
SSR14	YES	YES	hpEurope	YES	0.8137	1	Datadryad	53.7798	-7.30553	Ireland	Europe	Human	H. pylori	Ubiquitous	Human	Thorell, Yahara et al., 2017, 10.1371/journal.pgen.1006546
SSR17	YES	YES	hpEurope	YES	0.7918	1	Datadryad	53.7798	-7.30553	Ireland	Europe	Human	H. pylori	Ubiquitous	Human	Thorell, Yahara et al., 2017, 10.1371/journal.pgen.1006546
SSR2	YES	YES	hpEurope	YES	0.7987	1	Datadryad	53.7798	-7.30553	Ireland	Europe	Human	H. pylori	Ubiquitous	Human	Thorell, Yahara et al., 2017, 10.1371/journal.pgen.1006546
SSR20	YES	YES	hpEurope	YES	0.8084	1	Datadryad	53.7798	-7.30553	Ireland	Europe	Human	H. pylori	Ubiquitous	Human	Thorell, Yahara et al., 2017, 10.1371/journal.pgen.1006546
SSR22	YES	YES	hpEurope	YES	0.8292	1	Datadryad	53.7798	-7.30553	Ireland	Europe	Human	H. pylori	Ubiquitous	Human	Thorell, Yahara et al., 2017, 10.1371/journal.pgen.1006546
SSR23	YES	YES	hpEurope	YES	0.8061	1	Datadryad	53.7798	-7.30553	Ireland	Europe	Human	H. pylori	Ubiquitous	Human	Thorell, Yahara et al., 2017, 10.1371/journal.pgen.1006546
SSR33	YES	YES	hpEurope	YES	0.8222	1	Datadryad	53.7798	-7.30553	Ireland	Europe	Human	H. pylori	Ubiquitous	Human	Thorell, Yahara et al., 2017, 10.1371/journal.pgen.1006546
GCA_002532625.1	NO	YES	hpEurope	YES	0.9147	46	NCBI	4.38	-74.05	Colombia	South_America	Human	H. pylori	Ubiquitous	Human	Gutierrez-Escobar et al., 2017, 10.1186/s13099-017-0201-1
GCA_002533825.1	NO	YES	hpEurope	YES	0.9066	52	NCBI	4.38	-74.05	Colombia	South_America	Human	H. pylori	Ubiquitous	Human	Gutierrez-Escobar et al., 2017, 10.1186/s13099-017-0201-1
GCA_003059965.1	NO	YES	hpEurope	YES	0.9118	51	NCBI	46.2276	2.21375	France	Europe	Human	H. pylori	Ubiquitous	Human	Berthenet et al., 2018, 10.1186/s12915-018-0550-3
GCA_024413955.1	NO	YES	hpEurope	YES	0.9159	44	NCBI	50.5039	4.46994	Belgium	Europe	Human	H. pylori	Ubiquitous	Human	Thorpe et al., 2022, 10.1038/s41467-022-34475-3
HEL_AA5958AA_AS	NO	YES	hpEurope	YES	0.9133	74	Entero	67.44	72.52	Russia	North_Asia	Human	H. pylori	Ubiquitous	Human	M. Achtman
HEL_AA6028AA_AS	NO	YES	hpEurope	YES	0.9051	39	Entero	67.44	72.52	Russia	North_Asia	Human	H. pylori	Ubiquitous	Human	M. Achtman
HEL_AA6029AA_AS	NO	YES	hpEurope	YES	0.9006	97	Entero	67.44	72.52	Russia	North_Asia	Human	H. pylori	Ubiquitous	Human	M. Achtman
HEL_AA6052AA_AS	NO	YES	hpEurope	YES	0.908	97	Entero	67.44	72.52	Russia	North_Asia	Human	H. pylori	Ubiquitous	Human	M. Achtman
HEL_AA7263AA_AS	NO	YES	hpEurope	YES	0.9045	121	Entero	64.49	63.59	Russia	North_Asia	Human	H. pylori	Ubiquitous	Human	M. Achtman
HEL_AA7269AA_AS	NO	YES	hpEurope	YES	0.9068	189	Entero	64.49	63.59	Russia	North_Asia	Human	H. pylori	Ubiquitous	Human	M. Achtman
HEL_AA7321AA_AS	NO	YES	hpEurope	YES	0.902	71	Entero	64.49	63.59	Russia	North_Asia	Human	H. pylori	Ubiquitous	Human	M. Achtman
HEL_AA0105AA_AS	NO	YES	hpEurope	YES	0.9085	42	Entero	-9.18997	-75.0152	Peru	South_America	Human	H. pylori	Ubiquitous	Human	DTU-CfB
HEL_BA3942AA_AS	NO	YES	hpEurope	YES	0.877	79	Entero	47.3667	8.55	Switzerland	Europe	Human	H. pylori	Ubiquitous	Human	University Hospital Basel
3697	NO	YES	hpEurope	YES	0.8075	1	Datadryad	46.2276	2.21375	France	Europe		H. pylori	Ubiquitous		Tourrette et al., 2024, 10.1038/s41586-024-07991-z from Falush
HEL_CA4859AA_AS	NO	YES	hpEurope	YES	0.9284	1	Entero	-9.18997	-75.0152	Peru	South_America	Human	H. pylori	Ubiquitous	Human	Tourrette et al., 2024, 10.1038/s41586-024-07991-z from Falush
HEL_BA3562AA_AS	NO	YES	hpEurope	YES	0.9213	1	Entero	35.9078	127.767	South_Korea	East_Asia	Human	H. pylori	Ubiquitous	Human	Su et al., 2019, 10.1038/s41598-019-47240-2
HEL_CA4763AA_AS	NO	YES	hpEurope	YES	0.9211	1	Entero	55.1694	23.8813	Lithuania	Europe	Human	H. pylori	Ubiquitous	Human	Tourrette et al., 2024, 10.1038/s41586-024-07991-z from Falush
HEL_CA4615AA_AS	NO	YES	hpEurope	YES	0.9206	1	Entero	41.8719	12.5674	Italy	Europe	Human	H. pylori	Ubiquitous	Human	Tourrette et al., 2024, 10.1038/s41586-024-07991-z from Falush
HEL_CA6178AA_AS	NO	YES	hpEurope	YES	0.9138	1	Entero	36.2048	138.253	Japan	East_Asia	Human	H. pylori	Ubiquitous	Human	Tourrette et al., 2024, 10.1038/s41586-024-07991-z from Falush
HEL_CA4579AA_AS	NO	YES	hpEurope	YES	0.9082	1	Entero	31.0461	34.8516	Israel	West_Asia	Human	H. pylori	Ubiquitous	Human	Tourrette et al., 2024, 10.1038/s41586-024-07991-z from Falush
HEL_CA0128AA_AS	NO	YES	hpEurope	YES	0.9048	1	Entero	35.8617	104.195	China	East_Asia	Human	H. pylori	Ubiquitous	Human	Shanghai Jiao Tong University
HEL_CA4233AA_AS	NO	YES	hpEurope	YES	0.896	1	Entero	-35.6751	-71.543	Chile	South_America	Human	H. pylori	Ubiquitous	Human	Tourrette et al., 2024, 10.1038/s41586-024-07991-z from Falush
HEL_CA4519AA_AS	NO	YES	hpEurope	YES	0.8952	1	Entero	32.4279	53.688	Iran	West_Asia	Human	H. pylori	Ubiquitous	Human	Tourrette et al., 2024, 10.1038/s41586-024-07991-z from Falush
HEL_CA4373AA_AS	NO	YES	hpEurope	YES	0.8938	1	Entero	-35.6751	-71.543	Chile	South_America	Human	H. pylori	Ubiquitous	Human	Tourrette et al., 2024, 10.1038/s41586-024-07991-z from Falush
HEL_CA4545AA_AS	NO	YES	hpEurope	YES	0.8903	1	Entero	39.0742	21.8243	Greece	Europe	Human	H. pylori	Ubiquitous	Human	Tourrette et al., 2024, 10.1038/s41586-024-07991-z from Falush
HEL_BA9618AA_AS	NO	YES	hpEurope	YES	0.8861	25	Entero	61.524	105.319	Russia	North_Asia	Human	H. pylori	Ubiquitous	Human	Tourrette et al., 2024, 10.1038/s41586-024-07991-z
HEL_AA8636AA_AS	NO	YES	hpEurope	YES	0.9133	27	Entero	12.1494	-86.311	Nicaragua	North_America	Human	H. pylori	Ubiquitous	Human	kaisa.thorell@gmail.com
HEL_CA5096AA_AS	NO	YES	hpEurope	YES	0.9033	28	Entero	36.2048	138.253	Japan	East_Asia	Human	H. pylori	Ubiquitous	Human	Tourrette et al., 2024, 10.1038/s41586-024-07991-z
HEL_CA5281AA_AS	NO	YES	hpEurope	YES	0.9158	29	Entero	32.4279	53.688	Iran	West_Asia	Human	H. pylori	Ubiquitous	Human	Tourrette et al., 2024, 10.1038/s41586-024-07991-z
HEL_CA5325AA_AS	NO	YES	hpEurope	YES	0.9171	32	Entero	32.4279	53.688	Iran	West_Asia	Human	H. pylori	Ubiquitous	Human	Tourrette et al., 2024, 10.1038/s41586-024-07991-z
HEL_CA3801AA_AS	NO	YES	hpEurope	YES	0.9053	33	Entero	18.7357	-70.1627	Dominican_Republic	South_America	Human	H. pylori	Ubiquitous	Human	Tourrette et al., 2024, 10.1038/s41586-024-07991-z
HEL_AA6886AA_AS	NO	YES	hpEurope	YES	0.9013	35	Entero	31	35	Israel	West_Asia	Human	H. pylori	Ubiquitous	Human	Thorpe et al., 2022, 10.1038/s41467-022-34475-3
T171	NO	YES	hpEurope	YES	0.8823	37	LLT	29.66	91.13	China	East_Asia	Human	H. pylori	Ubiquitous	Human	Unpublished_data
HEL_CA3271AA_AS	NO	YES	hpEurope	YES	0.9289	37	Entero	14.0583	108.277	Vietnam	Southeast_Asia	Human	H. pylori	Ubiquitous	Human	Tourrette et al., 2024, 10.1038/s41586-024-07991-z
HEL_BA9826AA_AS	NO	YES	hpEurope	YES	0.8887	38	Entero	61.524	105.319	Russia	North_Asia	Human	H. pylori	Ubiquitous	Human	Tourrette et al., 2024, 10.1038/s41586-024-07991-z
HEL_CA6457AA_AS	NO	YES	hpEurope	YES	0.9177	39	Entero	15.87	100.993	Thailand	Southeast_Asia	Human	H. pylori	Ubiquitous	Human	Tourrette et al., 2024, 10.1038/s41586-024-07991-z
CB14	NO	YES	hpEurope	YES	0.8787	41	LLT	30.67	104.06	China	East_Asia	Human	H. pylori	Ubiquitous	Human	Unpublished_data
HEL_BA4781AA_AS	NO	YES	hpEurope	YES	0.918	42	Entero	47.3667	8.55	Switzerland	Europe	Human	H. pylori	Ubiquitous	Human	University Hospital Basel
HEL_CA5168AA_AS	NO	YES	hpEurope	YES	0.9152	43	Entero	32.4279	53.688	Iran	West_Asia	Human	H. pylori	Ubiquitous	Human	Tourrette et al., 2024, 10.1038/s41586-024-07991-z
HEL_AA6018AA_AS	NO	YES	hpEurope	YES	0.8991	43	Entero	29.28	31.24	Egypt	Africa	Human	H. pylori	Ubiquitous	Human	Tourrette et al., 2024, 10.1038/s41586-024-07991-z
HEL_BA4887AA_AS	NO	YES	hpEurope	YES	0.9057	44	Entero	-25.2744	133.775	Australia	Oceania	Human	H. pylori	Ubiquitous	Human	Chua et al., 2019, 10.1093/gastro/goy048
HEL_BA9114AA_AS	NO	YES	hpEurope	YES	0.9432	46	Entero	-31.6	115.5	Australia	Oceania	Human	H. pylori	Ubiquitous	Human	Tourrette et al., 2024, 10.1038/s41586-024-07991-z
T001	NO	YES	hpEurope	YES	0.9092	48	LLT	30.67	104.06	China	East_Asia	Human	H. pylori	Ubiquitous	Human	Unpublished_data
HEL_BA8606AA_AS	NO	YES	hpEurope	YES	0.9288	48	Entero	-25.2744	133.775	Australia	Oceania	Human	H. pylori	Ubiquitous	Human	Monash University
HEL_AA0219AA_AS	NO	YES	hpEurope	YES	0.918	51	Entero	38.765	-9.16451	Portugal	Europe	Human	H. pylori	Ubiquitous	Human	National Institute of Health, Portugal
HEL_CA5829AA_AS	NO	YES	hpEurope	YES	0.9018	52	Entero	41.3775	64.5853	Uzbekistan	Central_Asia	Human	H. pylori	Ubiquitous	Human	Tourrette et al., 2024, 10.1038/s41586-024-07991-z
HEL_AA6790AA_AS	NO	YES	hpEurope	YES	0.9188	55	Entero	23.6345	-102.553	Mexico	North_America	Human	H. pylori	Ubiquitous	Human	Muñoz-Ramirez et al., 2017, 10.3389/fcimb.2017.00050
HEL_AA6710AA_AS	NO	YES	hpEurope	YES	0.9075	56	Entero	5	-72	Colombia	South_America	Human	H. pylori	Ubiquitous	Human	Muñoz-Ramirez et al., 2017, 10.3389/fcimb.2017.00050
HEL_AA6672AA_AS	NO	YES	hpEurope	YES	0.9168	60	Entero	50.5039	4.46994	Belgium	Europe	Human	H. pylori	Ubiquitous	Human	Berthenet et al., 2018, 10.1186/s12915-018-0550-3
HEL_CA5411AA_AS	NO	YES	hpEurope	YES	0.9084	63	Entero	32.4279	53.688	Iran	West_Asia	Human	H. pylori	Ubiquitous	Human	Tourrette et al., 2024, 10.1038/s41586-024-07991-z
HEL_CA4201AA_AS	NO	YES	hpEurope	YES	0.9119	80	Entero	14.0583	108.277	Vietnam	Southeast_Asia	Human	H. pylori	Ubiquitous	Human	Tourrette et al., 2024, 10.1038/s41586-024-07991-z
HEL_CA3112AA_AS	NO	YES	hpEurope	YES	0.862	129	Entero	46.2276	2.21375	France	Europe	Human	H. pylori	Ubiquitous	Human	Tourrette et al., 2024, 10.1038/s41586-024-07991-z from Falush
HEL_CA5453AA_AS	NO	YES	hpEurope	YES	0.9376	130	Entero	32.4279	53.688	Iran	West_Asia	Human	H. pylori	Ubiquitous	Human	Tourrette et al., 2024, 10.1038/s41586-024-07991-z
HEL_BA5237AA_AS	NO	YES	hpEurope	YES	0.9285	151	Entero	4.38	-74.05	Colombia	South_America	Human	H. pylori	Ubiquitous	Human	Gutierrez-Escobar et al., 2017, 10.1186/s13099-017-0201-1
GRA247	NO	NO	hpEurope	YES	0.8169	1	Datadryad	46.2276	2.21375	France	Europe	Human	H. pylori	Ubiquitous	Human	Thorell, Yahara et al., 2017, 10.1371/journal.pgen.1006546
SSR4	NO	NO	hpEurope	YES	0.7865	1	Datadryad	53.7798	-7.30553	Ireland	Europe	Human	H. pylori	Ubiquitous	Human	Thorell, Yahara et al., 2017, 10.1371/journal.pgen.1006546
SSR40	NO	NO	hpEurope	YES	0.8193	1	Datadryad	53.7798	-7.30553	Ireland	Europe	Human	H. pylori	Ubiquitous	Human	Thorell, Yahara et al., 2017, 10.1371/journal.pgen.1006546
SSR43	NO	NO	hpEurope	YES	0.7811	1	Datadryad	53.7798	-7.30553	Ireland	Europe	Human	H. pylori	Ubiquitous	Human	Thorell, Yahara et al., 2017, 10.1371/journal.pgen.1006546
3738	NO	NO	hpEurope	YES	0.8008	1	Datadryad	46.2276	2.21375	France	Europe		H. pylori	Ubiquitous		Tourrette et al., 2024, 10.1038/s41586-024-07991-z from Falush
3745	NO	NO	hpEurope	YES	0.7697	1	Datadryad	46.2276	2.21375	France	Europe		H. pylori	Ubiquitous		Tourrette et al., 2024, 10.1038/s41586-024-07991-z from Falush
3746	NO	NO	hpEurope	YES	0.8069	1	Datadryad	46.2276	2.21375	France	Europe		H. pylori	Ubiquitous		Tourrette et al., 2024, 10.1038/s41586-024-07991-z from Falush
3754	NO	NO	hpEurope	YES	0.8046	1	Datadryad	46.2276	2.21375	France	Europe		H. pylori	Ubiquitous		Tourrette et al., 2024, 10.1038/s41586-024-07991-z from Falush
3800	NO	NO	hpEurope	YES	0.7961	1	Datadryad	46.2276	2.21375	France	Europe		H. pylori	Ubiquitous		Tourrette et al., 2024, 10.1038/s41586-024-07991-z from Falush
HEL_CA4766AA_AS	NO	NO	hpEurope	YES	0.9337	1	Entero	55.1694	23.8813	Lithuania	Europe	Human	H. pylori	Ubiquitous	Human	Tourrette et al., 2024, 10.1038/s41586-024-07991-z from Falush
HEL_CA5004AA_AS	NO	NO	hpEurope	YES	0.9057	1	Entero	40.45	-3.25	Spain	Europe	Human	H. pylori	Ubiquitous	Human	Tourrette et al., 2024, 10.1038/s41586-024-07991-z from Falush
HEL_CA4357AA_AS	NO	NO	hpEurope	YES	0.8926	1	Entero	4.57087	-74.2973	Colombia	South_America	Human	H. pylori	Ubiquitous	Human	Tourrette et al., 2024, 10.1038/s41586-024-07991-z from Falush
GCA_011140745.1	NO	NO	hpEurope	YES	0.9055	33	NCBI	23.6345	-102.553	Mexico	North_America	Human	H. pylori	Ubiquitous	Human	Camorlinga-Ponce et al., 2021, 10.3389/fcimb.2020.539115
HEL_BA9417AA_AS	NO	NO	hpEurope	YES	0.9086	42	Entero	-23.36	120.78	Australia	Oceania	Human	H. pylori	Ubiquitous	Human	Tourrette et al., 2024, 10.1038/s41586-024-07991-z
GCA_024407335.1	NO	NO	hpEurope	YES	0.8832	50	NCBI	39.0742	21.8243	Greece	Europe	Human	H. pylori	Ubiquitous	Human	Thorpe et al., 2022, 10.1038/s41467-022-34475-3
GCA_006438415.1	NO	NO	hpEurope	YES	0.9039	54	NCBI	14.0583	108.277	Vietnam	Southeast_Asia	Human	H. pylori	Ubiquitous	Human	Tuan et al., 2019, 10.3390/jcm8060858
HEL_CA3951AA_AS	NO	NO	hpEurope	YES	0.9235	490	Entero	18.7357	-70.1627	Dominican_Republic	South_America	Human	H. pylori	Ubiquitous	Human	Tourrette et al., 2024, 10.1038/s41586-024-07991-z
GCA_013430455.1	NO	NO	hpEurope	YES	0.9009	54	NCBI	22	114	China	East_Asia	Human	H. pylori	Ubiquitous	Human	Zhang et al., 2020, 10.1093/jac/dkaa302
GCA_024406995.1	NO	NO	hpEurope	YES	0.9103	68	NCBI	39.0742	21.8243	Greece	Europe	Human	H. pylori	Ubiquitous	Human	Thorpe et al., 2022, 10.1038/s41467-022-34475-3
GCA_024407295.1	NO	NO	hpEurope	YES	0.9139	56	NCBI	39.0742	21.8243	Greece	Europe	Human	H. pylori	Ubiquitous	Human	Thorpe et al., 2022, 10.1038/s41467-022-34475-3
HEL_AA6053AA_AS	NO	NO	hpEurope	YES	0.9043	67	Entero	65	25.28	Finland	Europe	Human	H. pylori	Ubiquitous	Human	Tourrette et al., 2024, 10.1038/s41586-024-07991-z
HEL_AA7272AA_AS	NO	NO	hpEurope	YES	0.9035	56	Entero	-25.2744	133.775	Australia	Oceania	Human	H. pylori	Ubiquitous	Human	Tourrette et al., 2024, 10.1038/s41586-024-07991-z
HEL_AA8648AA_AS	NO	NO	hpEurope	YES	0.9247	44	Entero	60.1282	18.6435	Sweden	Europe	Human	H. pylori	Ubiquitous	Human	Tourrette et al., 2024, 10.1038/s41586-024-07991-z
HEL_BA8865AA_AS	NO	NO	hpEurope	YES	0.8935	45	Entero	62.01	129.43	Russia	North_Asia	Human	H. pylori	Ubiquitous	Human	Tourrette et al., 2024, 10.1038/s41586-024-07991-z
HEL_BA8886AA_AS	NO	NO	hpEurope	YES	0.9199	29	Entero	-23.36	120.78	Australia	Oceania	Human	H. pylori	Ubiquitous	Human	Tourrette et al., 2024, 10.1038/s41586-024-07991-z
HEL_BA9522AA_AS	NO	NO	hpEurope	YES	0.9025	50	Entero	-23.36	120.78	Australia	Oceania	Human	H. pylori	Ubiquitous	Human	Tourrette et al., 2024, 10.1038/s41586-024-07991-z
HEL_CA3235AA_AS	NO	NO	hpEurope	YES	0.9025	50	Entero	23.685	90.3563	Bangladesh	South_Asia	Human	H. pylori	Ubiquitous	Human	Tourrette et al., 2024, 10.1038/s41586-024-07991-z
HEL_CA3970AA_AS	NO	NO	hpEurope	YES	0.9141	59	Entero	38	21	Greece	Europe	Human	H. pylori	Ubiquitous	Human	Tourrette et al., 2024, 10.1038/s41586-024-07991-z from Falush
HEL_CA4385AA_AS	NO	NO	hpEurope	YES	0.9057	1	Entero	-35.6751	-71.543	Chile	South_America	Human	H. pylori	Ubiquitous	Human	Tourrette et al., 2024, 10.1038/s41586-024-07991-z from Falush
HEL_CA4978AA_AS	NO	NO	hpEurope	YES	0.9208	1	Entero	40.45	-3.25	Spain	Europe	Human	H. pylori	Ubiquitous	Human	Tourrette et al., 2024, 10.1038/s41586-024-07991-z from Falush
HEL_CA5019AA_AS	NO	NO	hpEurope	YES	0.9189	1	Entero	40.45	-3.25	Spain	Europe	Human	H. pylori	Ubiquitous	Human	Tourrette et al., 2024, 10.1038/s41586-024-07991-z from Falush
HEL_CA5327AA_AS	NO	NO	hpEurope	YES	0.8984	32	Entero	32.4279	53.688	Iran	West_Asia	Human	H. pylori	Ubiquitous	Human	Tourrette et al., 2024, 10.1038/s41586-024-07991-z
HEL_CA5554AA_AS	NO	NO	hpEurope	YES	0.911	34	Entero	32.4279	53.688	Iran	West_Asia	Human	H. pylori	Ubiquitous	Human	Tourrette et al., 2024, 10.1038/s41586-024-07991-z
HEL_CA6470AA_AS	NO	NO	hpEurope	YES	0.9256	43	Entero	15.87	100.993	Thailand	Southeast_Asia	Human	H. pylori	Ubiquitous	Human	Tourrette et al., 2024, 10.1038/s41586-024-07991-z
HEL_CA6533AA_AS	NO	NO	hpEurope	YES	0.8972	43	Entero	15.87	100.993	Thailand	Southeast_Asia	Human	H. pylori	Ubiquitous	Human	Tourrette et al., 2024, 10.1038/s41586-024-07991-z
HEL_CA6248AA_AS	NO	NO	hpEurope	YES	0.9886	1	Entero	51.1657	10.4515	Germany	Europe	Human	H. pylori	Ubiquitous	Human	Tourrette et al., 2024, 10.1038/s41586-024-07991-z from Falush
HEL_CA4764AA_AS	NO	NO	hpEurope	YES	0.9653	1	Entero	55.1694	23.8813	Lithuania	Europe	Human	H. pylori	Ubiquitous	Human	Tourrette et al., 2024, 10.1038/s41586-024-07991-z from Falush
HEL_CA4479AA_AS	NO	NO	hpEurope	YES	0.9602	1	Entero	51.1657	10.4515	Germany	Europe	Human	H. pylori	Ubiquitous	Human	Tourrette et al., 2024, 10.1038/s41586-024-07991-z from Falush
HEL_CA4490AA_AS	NO	NO	hpEurope	YES	0.9581	1	Entero	46.2276	2.21375	France	Europe	Human	H. pylori	Ubiquitous	Human	Tourrette et al., 2024, 10.1038/s41586-024-07991-z from Falush
HEL_CA4484AA_AS	NO	NO	hpEurope	YES	0.9573	1	Entero	51.1657	10.4515	Germany	Europe	Human	H. pylori	Ubiquitous	Human	Tourrette et al., 2024, 10.1038/s41586-024-07991-z from Falush
HEL_BA3581AA_AS	NO	NO	hpEurope	YES	0.9552	1	Entero	51.1657	10.4515	Germany	Europe	Human	H. pylori	Ubiquitous	Human	Ailloud et al., 2019, 10.1038/s41467-019-10050-1
HEL_CA4457AA_AS	NO	NO	hpEurope	YES	0.9541	1	Entero	46.2276	2.21375	France	Europe	Human	H. pylori	Ubiquitous	Human	Tourrette et al., 2024, 10.1038/s41586-024-07991-z from Falush
HEL_CA4606AA_AS	NO	NO	hpEurope	YES	0.954	1	Entero	41.8719	12.5674	Italy	Europe	Human	H. pylori	Ubiquitous	Human	Tourrette et al., 2024, 10.1038/s41586-024-07991-z from Falush
HEL_CA4569AA_AS	NO	NO	hpEurope	YES	0.9513	1	Entero	20.5937	78.9629	India	South_Asia	Human	H. pylori	Ubiquitous	Human	Tourrette et al., 2024, 10.1038/s41586-024-07991-z from Falush
HEL_CA4733AA_AS	NO	NO	hpEurope	YES	0.9489	1	Entero	56.8796	24.6032	Latvia	Europe	Human	H. pylori	Ubiquitous	Human	Tourrette et al., 2024, 10.1038/s41586-024-07991-z from Falush
HEL_CA4178AA_AS	NO	NO	hpEurope	YES	0.9475	1	Entero	42.7339	25.4858	Bulgaria	Europe	Human	H. pylori	Ubiquitous	Human	Tourrette et al., 2024, 10.1038/s41586-024-07991-z from Falush
HEL_CA4499AA_AS	NO	NO	hpEurope	YES	0.9473	1	Entero	39.0742	21.8243	Greece	Europe	Human	H. pylori	Ubiquitous	Human	Tourrette et al., 2024, 10.1038/s41586-024-07991-z from Falush
HEL_CA5084AA_AS	NO	NO	hpEurope	YES	0.9442	1	Entero	59.51	38.28	Sweden	Europe	Human	H. pylori	Ubiquitous	Human	Tourrette et al., 2024, 10.1038/s41586-024-07991-z from Falush
HEL_CA5079AA_AS	NO	NO	hpEurope	YES	0.9434	1	Entero	59.51	38.28	Sweden	Europe	Human	H. pylori	Ubiquitous	Human	Tourrette et al., 2024, 10.1038/s41586-024-07991-z from Falush
HEL_BA3583AA_AS	NO	NO	hpEurope	YES	0.942	1	Entero	51.1657	10.4515	Germany	Europe	Human	H. pylori	Ubiquitous	Human	Ailloud et al., 2019, 10.1038/s41467-019-10050-1
HEL_BA3584AA_AS	NO	NO	hpEurope	YES	0.9419	1	Entero	51.1657	10.4515	Germany	Europe	Human	H. pylori	Ubiquitous	Human	Ailloud et al., 2019, 10.1038/s41467-019-10050-1
HEL_CA5035AA_AS	NO	NO	hpEurope	YES	0.9418	1	Entero	40.45	-3.25	Spain	Europe	Human	H. pylori	Ubiquitous	Human	Tourrette et al., 2024, 10.1038/s41586-024-07991-z from Falush
HEL_BA3576AA_AS	NO	NO	hpEurope	YES	0.9414	1	Entero	51.1657	10.4515	Germany	Europe	Human	H. pylori	Ubiquitous	Human	Ailloud et al., 2019, 10.1038/s41467-019-10050-1
HEL_CA5687AA_AS	NO	NO	hpEurope	YES	0.9413	1	Entero	38.9637	35.2433	Turkey	Europe	Human	H. pylori	Ubiquitous	Human	Tourrette et al., 2024, 10.1038/s41586-024-07991-z from Falush
HEL_CA4744AA_AS	NO	NO	hpEurope	YES	0.9408	1	Entero	56.8796	24.6032	Latvia	Europe	Human	H. pylori	Ubiquitous	Human	Tourrette et al., 2024, 10.1038/s41586-024-07991-z from Falush
HEL_CA4771AA_AS	NO	NO	hpEurope	YES	0.9404	1	Entero	55.1694	23.8813	Lithuania	Europe	Human	H. pylori	Ubiquitous	Human	Tourrette et al., 2024, 10.1038/s41586-024-07991-z from Falush
HEL_CA4572AA_AS	NO	NO	hpEurope	YES	0.94	1	Entero	39.0742	21.8243	Greece	Europe	Human	H. pylori	Ubiquitous	Human	Tourrette et al., 2024, 10.1038/s41586-024-07991-z from Falush
HEL_BA3572AA_AS	NO	NO	hpEurope	YES	0.9391	1	Entero	51.1657	10.4515	Germany	Europe	Human	H. pylori	Ubiquitous	Human	Ailloud et al., 2019, 10.1038/s41467-019-10050-1
HEL_CA4454AA_AS	NO	NO	hpEurope	YES	0.9391	1	Entero	46.2276	2.21375	France	Europe	Human	H. pylori	Ubiquitous	Human	Tourrette et al., 2024, 10.1038/s41586-024-07991-z from Falush
HEL_CA4752AA_AS	NO	NO	hpEurope	YES	0.9391	1	Entero	56.8796	24.6032	Latvia	Europe	Human	H. pylori	Ubiquitous	Human	Tourrette et al., 2024, 10.1038/s41586-024-07991-z from Falush
HEL_CA5192AA_AS	NO	NO	hpEurope	YES	0.9391	1	Entero	59.51	38.28	Sweden	Europe	Human	H. pylori	Ubiquitous	Human	Tourrette et al., 2024, 10.1038/s41586-024-07991-z from Falush
HEL_CA4604AA_AS	NO	NO	hpEurope	YES	0.9386	1	Entero	41.8719	12.5674	Italy	Europe	Human	H. pylori	Ubiquitous	Human	Tourrette et al., 2024, 10.1038/s41586-024-07991-z from Falush
HEL_CA4502AA_AS	NO	NO	hpEurope	YES	0.9385	1	Entero	51.1657	10.4515	Germany	Europe	Human	H. pylori	Ubiquitous	Human	Tourrette et al., 2024, 10.1038/s41586-024-07991-z from Falush
HEL_CA4516AA_AS	NO	NO	hpEurope	YES	0.9385	1	Entero	39.0742	21.8243	Greece	Europe	Human	H. pylori	Ubiquitous	Human	Tourrette et al., 2024, 10.1038/s41586-024-07991-z from Falush
HEL_CA5202AA_AS	NO	NO	hpEurope	YES	0.9385	1	Entero	46.8182	8.22751	Switzerland	Europe	Human	H. pylori	Ubiquitous	Human	Tourrette et al., 2024, 10.1038/s41586-024-07991-z from Falush
HEL_CA4459AA_AS	NO	NO	hpEurope	YES	0.9384	1	Entero	46.2276	2.21375	France	Europe	Human	H. pylori	Ubiquitous	Human	Tourrette et al., 2024, 10.1038/s41586-024-07991-z from Falush
HEL_CA4342AA_AS	NO	NO	hpEurope	YES	0.9376	1	Entero	4.57087	-74.2973	Colombia	South_America	Human	H. pylori	Ubiquitous	Human	Tourrette et al., 2024, 10.1038/s41586-024-07991-z from Falush
HEL_CA4769AA_AS	NO	NO	hpEurope	YES	0.9371	1	Entero	55.1694	23.8813	Lithuania	Europe	Human	H. pylori	Ubiquitous	Human	Tourrette et al., 2024, 10.1038/s41586-024-07991-z from Falush
HEL_CA4950AA_AS	NO	NO	hpEurope	YES	0.9368	1	Entero	49.26	136.32	Russia	North_Asia	Human	H. pylori	Ubiquitous	Human	Tourrette et al., 2024, 10.1038/s41586-024-07991-z from Falush
HEL_CA5790AA_AS	NO	NO	hpEurope	YES	0.9368	1	Entero	38.9637	35.2433	Turkey	Europe	Human	H. pylori	Ubiquitous	Human	Tourrette et al., 2024, 10.1038/s41586-024-07991-z from Falush
HEL_CA4816AA_AS	NO	NO	hpEurope	YES	0.9366	1	Entero	23.6345	-102.553	Mexico	North_America	Human	H. pylori	Ubiquitous	Human	Tourrette et al., 2024, 10.1038/s41586-024-07991-z from Falush
HEL_CA5085AA_AS	NO	NO	hpEurope	YES	0.9366	1	Entero	59.51	38.28	Sweden	Europe	Human	H. pylori	Ubiquitous	Human	Tourrette et al., 2024, 10.1038/s41586-024-07991-z from Falush
HEL_CA4609AA_AS	NO	NO	hpEurope	YES	0.9364	1	Entero	41.8719	12.5674	Italy	Europe	Human	H. pylori	Ubiquitous	Human	Tourrette et al., 2024, 10.1038/s41586-024-07991-z from Falush
HEL_CA4659AA_AS	NO	NO	hpEurope	YES	0.9364	1	Entero	41.2044	74.7661	Kyrgyzstan	Central_Asia	Human	H. pylori	Ubiquitous	Human	Tourrette et al., 2024, 10.1038/s41586-024-07991-z from Falush
HEL_CA4887AA_AS	NO	NO	hpEurope	YES	0.9364	1	Entero	51.9194	19.1451	Poland	Europe	Human	H. pylori	Ubiquitous	Human	Tourrette et al., 2024, 10.1038/s41586-024-07991-z from Falush
HEL_CA4513AA_AS	NO	NO	hpEurope	YES	0.9362	1	Entero	51.1657	10.4515	Germany	Europe	Human	H. pylori	Ubiquitous	Human	Tourrette et al., 2024, 10.1038/s41586-024-07991-z from Falush
HEL_BA3586AA_AS	NO	NO	hpEurope	YES	0.9357	1	Entero	51.1657	10.4515	Germany	Europe	Human	H. pylori	Ubiquitous	Human	Ailloud et al., 2019, 10.1038/s41467-019-10050-1
HEL_CA5086AA_AS	NO	NO	hpEurope	YES	0.9356	1	Entero	59.51	38.28	Sweden	Europe	Human	H. pylori	Ubiquitous	Human	Tourrette et al., 2024, 10.1038/s41586-024-07991-z from Falush
HEL_CA4486AA_AS	NO	NO	hpEurope	YES	0.9355	1	Entero	46.2276	2.21375	France	Europe	Human	H. pylori	Ubiquitous	Human	Tourrette et al., 2024, 10.1038/s41586-024-07991-z from Falush
HEL_CA4497AA_AS	NO	NO	hpEurope	YES	0.9355	1	Entero	39.0742	21.8243	Greece	Europe	Human	H. pylori	Ubiquitous	Human	Tourrette et al., 2024, 10.1038/s41586-024-07991-z from Falush
HEL_CA4765AA_AS	NO	NO	hpEurope	YES	0.9355	1	Entero	55.1694	23.8813	Lithuania	Europe	Human	H. pylori	Ubiquitous	Human	Tourrette et al., 2024, 10.1038/s41586-024-07991-z from Falush
HEL_CA4730AA_AS	NO	NO	hpEurope	YES	0.9353	1	Entero	56.8796	24.6032	Latvia	Europe	Human	H. pylori	Ubiquitous	Human	Tourrette et al., 2024, 10.1038/s41586-024-07991-z from Falush
HEL_CA5654AA_AS	NO	NO	hpEurope	YES	0.9353	1	Entero	38.7946	-106.535	United_States	North_America	Human	H. pylori	Ubiquitous	Human	Tourrette et al., 2024, 10.1038/s41586-024-07991-z from Falush
HEL_CA4503AA_AS	NO	NO	hpEurope	YES	0.935	1	Entero	51.1657	10.4515	Germany	Europe	Human	H. pylori	Ubiquitous	Human	Tourrette et al., 2024, 10.1038/s41586-024-07991-z from Falush
HEL_CA5052AA_AS	NO	NO	hpEurope	YES	0.9349	1	Entero	40.45	-3.25	Spain	Europe	Human	H. pylori	Ubiquitous	Human	Tourrette et al., 2024, 10.1038/s41586-024-07991-z from Falush
HEL_CA4584AA_AS	NO	NO	hpEurope	YES	0.9348	1	Entero	64.9631	-19.0208	Iceland	Europe	Human	H. pylori	Ubiquitous	Human	Tourrette et al., 2024, 10.1038/s41586-024-07991-z from Falush
HEL_CA4578AA_AS	NO	NO	hpEurope	YES	0.9347	1	Entero	32.4279	53.688	Iran	West_Asia	Human	H. pylori	Ubiquitous	Human	Tourrette et al., 2024, 10.1038/s41586-024-07991-z from Falush
HEL_CA4743AA_AS	NO	NO	hpEurope	YES	0.9346	1	Entero	56.8796	24.6032	Latvia	Europe	Human	H. pylori	Ubiquitous	Human	Tourrette et al., 2024, 10.1038/s41586-024-07991-z from Falush
HEL_BA3568AA_AS	NO	NO	hpEurope	YES	0.9346	1	Entero	41.5284	1.52618	Spain	Europe	Human	H. pylori	Ubiquitous	Human	Universitat Autonoma de Barcelona
HEL_CA4112AA_AS	NO	NO	hpEurope	YES	0.9344	1	Entero	23.685	90.3563	Bangladesh	South_Asia	Human	H. pylori	Ubiquitous	Human	Tourrette et al., 2024, 10.1038/s41586-024-07991-z from Falush
HEL_CA4148AA_AS	NO	NO	hpEurope	YES	0.9341	1	Entero	42.7339	25.4858	Bulgaria	Europe	Human	H. pylori	Ubiquitous	Human	Tourrette et al., 2024, 10.1038/s41586-024-07991-z from Falush
HEL_CA4239AA_AS	NO	NO	hpEurope	YES	0.9341	1	Entero	-35.6751	-71.543	Chile	South_America	Human	H. pylori	Ubiquitous	Human	Tourrette et al., 2024, 10.1038/s41586-024-07991-z from Falush
HEL_CA4315AA_AS	NO	NO	hpEurope	YES	0.934	1	Entero	28.0339	1.65963	Algeria	Africa	Human	H. pylori	Ubiquitous	Human	Tourrette et al., 2024, 10.1038/s41586-024-07991-z from Falush
HEL_CA5075AA_AS	NO	NO	hpEurope	YES	0.934	1	Entero	59.51	38.28	Sweden	Europe	Human	H. pylori	Ubiquitous	Human	Tourrette et al., 2024, 10.1038/s41586-024-07991-z from Falush
HEL_CA5191AA_AS	NO	NO	hpEurope	YES	0.9337	1	Entero	59.51	38.28	Sweden	Europe	Human	H. pylori	Ubiquitous	Human	Tourrette et al., 2024, 10.1038/s41586-024-07991-z from Falush
HEL_CA4938AA_AS	NO	NO	hpEurope	YES	0.9336	1	Entero	49.26	136.32	Russia	North_Asia	Human	H. pylori	Ubiquitous	Human	Tourrette et al., 2024, 10.1038/s41586-024-07991-z from Falush
HEL_CA4770AA_AS	NO	NO	hpEurope	YES	0.9334	1	Entero	55.1694	23.8813	Lithuania	Europe	Human	H. pylori	Ubiquitous	Human	Tourrette et al., 2024, 10.1038/s41586-024-07991-z from Falush
HEL_CA5227AA_AS	NO	NO	hpEurope	YES	0.9333	1	Entero	59.51	38.28	Sweden	Europe	Human	H. pylori	Ubiquitous	Human	Tourrette et al., 2024, 10.1038/s41586-024-07991-z from Falush
HEL_CA4979AA_AS	NO	NO	hpEurope	YES	0.933	1	Entero	40.45	-3.25	Spain	Europe	Human	H. pylori	Ubiquitous	Human	Tourrette et al., 2024, 10.1038/s41586-024-07991-z from Falush
HEL_CA5705AA_AS	NO	NO	hpEurope	YES	0.933	1	Entero	38.9637	35.2433	Turkey	Europe	Human	H. pylori	Ubiquitous	Human	Tourrette et al., 2024, 10.1038/s41586-024-07991-z from Falush
HEL_BA3575AA_AS	NO	NO	hpEurope	YES	0.9328	1	Entero	51.1657	10.4515	Germany	Europe	Human	H. pylori	Ubiquitous	Human	Ailloud et al., 2019, 10.1038/s41467-019-10050-1
HEL_CA4388AA_AS	NO	NO	hpEurope	YES	0.9324	1	Entero	56.1304	-106.347	Canada	North_America	Human	H. pylori	Ubiquitous	Human	Tourrette et al., 2024, 10.1038/s41586-024-07991-z from Falush
HEL_CA4595AA_AS	NO	NO	hpEurope	YES	0.9324	1	Entero	41.8719	12.5674	Italy	Europe	Human	H. pylori	Ubiquitous	Human	Tourrette et al., 2024, 10.1038/s41586-024-07991-z from Falush
HEL_CA4731AA_AS	NO	NO	hpEurope	YES	0.9324	1	Entero	56.8796	24.6032	Latvia	Europe	Human	H. pylori	Ubiquitous	Human	Tourrette et al., 2024, 10.1038/s41586-024-07991-z from Falush
HEL_CA4747AA_AS	NO	NO	hpEurope	YES	0.9323	1	Entero	56.8796	24.6032	Latvia	Europe	Human	H. pylori	Ubiquitous	Human	Tourrette et al., 2024, 10.1038/s41586-024-07991-z from Falush
HEL_CA4773AA_AS	NO	NO	hpEurope	YES	0.9323	1	Entero	55.1694	23.8813	Lithuania	Europe	Human	H. pylori	Ubiquitous	Human	Tourrette et al., 2024, 10.1038/s41586-024-07991-z from Falush
HEL_BA3558AA_AS	NO	NO	hpEurope	YES	0.9322	1	Entero	35.9078	127.767	South_Korea	East_Asia	Human	H. pylori	Ubiquitous	Human	Su et al., 2019, 10.1038/s41598-019-47240-2
HEL_CA4774AA_AS	NO	NO	hpEurope	YES	0.9322	1	Entero	55.1694	23.8813	Lithuania	Europe	Human	H. pylori	Ubiquitous	Human	Tourrette et al., 2024, 10.1038/s41586-024-07991-z from Falush
HEL_CA4617AA_AS	NO	NO	hpEurope	YES	0.9321	1	Entero	41.8719	12.5674	Italy	Europe	Human	H. pylori	Ubiquitous	Human	Tourrette et al., 2024, 10.1038/s41586-024-07991-z from Falush
HEL_CA4382AA_AS	NO	NO	hpEurope	YES	0.932	1	Entero	-35.6751	-71.543	Chile	South_America	Human	H. pylori	Ubiquitous	Human	Tourrette et al., 2024, 10.1038/s41586-024-07991-z from Falush
HEL_CA4596AA_AS	NO	NO	hpEurope	YES	0.932	1	Entero	41.8719	12.5674	Italy	Europe	Human	H. pylori	Ubiquitous	Human	Tourrette et al., 2024, 10.1038/s41586-024-07991-z from Falush
HEL_CA4600AA_AS	NO	NO	hpEurope	YES	0.9319	1	Entero	41.8719	12.5674	Italy	Europe	Human	H. pylori	Ubiquitous	Human	Tourrette et al., 2024, 10.1038/s41586-024-07991-z from Falush
HEL_CA5690AA_AS	NO	NO	hpEurope	YES	0.9319	1	Entero	38.9637	35.2433	Turkey	Europe	Human	H. pylori	Ubiquitous	Human	Tourrette et al., 2024, 10.1038/s41586-024-07991-z from Falush
HEL_BA3561AA_AS	NO	NO	hpEurope	YES	0.9318	1	Entero	35.9078	127.767	South_Korea	East_Asia	Human	H. pylori	Ubiquitous	Human	Su et al., 2019, 10.1038/s41598-019-47240-2
HEL_CA4762AA_AS	NO	NO	hpEurope	YES	0.9318	1	Entero	55.1694	23.8813	Lithuania	Europe	Human	H. pylori	Ubiquitous	Human	Tourrette et al., 2024, 10.1038/s41586-024-07991-z from Falush
HEL_CA4481AA_AS	NO	NO	hpEurope	YES	0.9317	1	Entero	46.2276	2.21375	France	Europe	Human	H. pylori	Ubiquitous	Human	Tourrette et al., 2024, 10.1038/s41586-024-07991-z from Falush
HEL_CA4682AA_AS	NO	NO	hpEurope	YES	0.9312	1	Entero	41.2044	74.7661	Kyrgyzstan	Central_Asia	Human	H. pylori	Ubiquitous	Human	Tourrette et al., 2024, 10.1038/s41586-024-07991-z from Falush
HEL_CA4472AA_AS	NO	NO	hpEurope	YES	0.931	1	Entero	51.1657	10.4515	Germany	Europe	Human	H. pylori	Ubiquitous	Human	Tourrette et al., 2024, 10.1038/s41586-024-07991-z from Falush
HEL_CA4889AA_AS	NO	NO	hpEurope	YES	0.931	1	Entero	51.9194	19.1451	Poland	Europe	Human	H. pylori	Ubiquitous	Human	Tourrette et al., 2024, 10.1038/s41586-024-07991-z from Falush
HEL_CA4196AA_AS	NO	NO	hpEurope	YES	0.9309	1	Entero	23.685	90.3563	Bangladesh	South_Asia	Human	H. pylori	Ubiquitous	Human	Tourrette et al., 2024, 10.1038/s41586-024-07991-z from Falush
HEL_CA4736AA_AS	NO	NO	hpEurope	YES	0.9309	1	Entero	56.8796	24.6032	Latvia	Europe	Human	H. pylori	Ubiquitous	Human	Tourrette et al., 2024, 10.1038/s41586-024-07991-z from Falush
HEL_CA5194AA_AS	NO	NO	hpEurope	YES	0.9309	1	Entero	59.51	38.28	Sweden	Europe	Human	H. pylori	Ubiquitous	Human	Tourrette et al., 2024, 10.1038/s41586-024-07991-z from Falush
HEL_BA3560AA_AS	NO	NO	hpEurope	YES	0.9304	1	Entero	46.2276	2.21375	France	Europe	Human	H. pylori	Ubiquitous	Human	Su et al., 2019, 10.1038/s41598-019-47240-2
HEL_CA4757AA_AS	NO	NO	hpEurope	YES	0.9304	1	Entero	55.1694	23.8813	Lithuania	Europe	Human	H. pylori	Ubiquitous	Human	Tourrette et al., 2024, 10.1038/s41586-024-07991-z from Falush
HEL_CA4851AA_AS	NO	NO	hpEurope	YES	0.93	1	Entero	-9.18997	-75.0152	Peru	South_America	Human	H. pylori	Ubiquitous	Human	Tourrette et al., 2024, 10.1038/s41586-024-07991-z from Falush
HEL_AA4386AA_AS	NO	NO	hpEurope	YES	0.9297	1	Entero	-25.2744	133.775	Australia	Oceania	Human	H. pylori	Ubiquitous	Human	Sichtig et al., 2019, 10.1038/s41467-019-11306-6
HEL_CA5024AA_AS	NO	NO	hpEurope	YES	0.9297	1	Entero	40.45	-3.25	Spain	Europe	Human	H. pylori	Ubiquitous	Human	Tourrette et al., 2024, 10.1038/s41586-024-07991-z from Falush
HEL_CA5088AA_AS	NO	NO	hpEurope	YES	0.9297	1	Entero	59.51	38.28	Sweden	Europe	Human	H. pylori	Ubiquitous	Human	Tourrette et al., 2024, 10.1038/s41586-024-07991-z from Falush
HEL_CA5081AA_AS	NO	NO	hpEurope	YES	0.9297	1	Entero	59.51	38.28	Sweden	Europe	Human	H. pylori	Ubiquitous	Human	Tourrette et al., 2024, 10.1038/s41586-024-07991-z from Falush
HEL_CA4402AA_AS	NO	NO	hpEurope	YES	0.9296	1	Entero	56.1304	-106.347	Canada	North_America	Human	H. pylori	Ubiquitous	Human	Tourrette et al., 2024, 10.1038/s41586-024-07991-z from Falush
HEL_CA4749AA_AS	NO	NO	hpEurope	YES	0.9296	1	Entero	56.8796	24.6032	Latvia	Europe	Human	H. pylori	Ubiquitous	Human	Tourrette et al., 2024, 10.1038/s41586-024-07991-z from Falush
HEL_CA5203AA_AS	NO	NO	hpEurope	YES	0.9296	1	Entero	56.8796	24.6032	Latvia	Europe	Human	H. pylori	Ubiquitous	Human	Tourrette et al., 2024, 10.1038/s41586-024-07991-z from Falush
HEL_CA4737AA_AS	NO	NO	hpEurope	YES	0.9295	1	Entero	56.8796	24.6032	Latvia	Europe	Human	H. pylori	Ubiquitous	Human	Tourrette et al., 2024, 10.1038/s41586-024-07991-z from Falush
HEL_CA4976AA_AS	NO	NO	hpEurope	YES	0.9295	1	Entero	40.45	-3.25	Spain	Europe	Human	H. pylori	Ubiquitous	Human	Tourrette et al., 2024, 10.1038/s41586-024-07991-z from Falush
HEL_AA4482AA_AS	NO	NO	hpEurope	YES	0.9294	1	Entero	50.5039	4.46994	Belgium	Europe	Human	H. pylori	Ubiquitous	Human	EBI
HEL_AA0403AA_AS	NO	NO	hpEurope	YES	0.9294	1	Entero	-25.2744	133.775	Australia	Oceania	Human	H. pylori	Ubiquitous	Human	Linz et al., 2013, 10.1371/journal.pone.0082187
HEL_CA4754AA_AS	NO	NO	hpEurope	YES	0.9294	1	Entero	56.8796	24.6032	Latvia	Europe	Human	H. pylori	Ubiquitous	Human	Tourrette et al., 2024, 10.1038/s41586-024-07991-z from Falush
HEL_CA4768AA_AS	NO	NO	hpEurope	YES	0.9294	1	Entero	55.1694	23.8813	Lithuania	Europe	Human	H. pylori	Ubiquitous	Human	Tourrette et al., 2024, 10.1038/s41586-024-07991-z from Falush
HEL_CA4582AA_AS	NO	NO	hpEurope	YES	0.9293	1	Entero	31.0461	34.8516	Israel	West_Asia	Human	H. pylori	Ubiquitous	Human	Tourrette et al., 2024, 10.1038/s41586-024-07991-z from Falush
HEL_CA4735AA_AS	NO	NO	hpEurope	YES	0.9293	1	Entero	56.8796	24.6032	Latvia	Europe	Human	H. pylori	Ubiquitous	Human	Tourrette et al., 2024, 10.1038/s41586-024-07991-z from Falush
HEL_CA5007AA_AS	NO	NO	hpEurope	YES	0.9293	1	Entero	40.45	-3.25	Spain	Europe	Human	H. pylori	Ubiquitous	Human	Tourrette et al., 2024, 10.1038/s41586-024-07991-z from Falush
HEL_CA4390AA_AS	NO	NO	hpEurope	YES	0.9292	1	Entero	56.1304	-106.347	Canada	North_America	Human	H. pylori	Ubiquitous	Human	Tourrette et al., 2024, 10.1038/s41586-024-07991-z from Falush
HEL_CA4265AA_AS	NO	NO	hpEurope	YES	0.9291	1	Entero	-35.6751	-71.543	Chile	South_America	Human	H. pylori	Ubiquitous	Human	Tourrette et al., 2024, 10.1038/s41586-024-07991-z from Falush
HEL_CA4186AA_AS	NO	NO	hpEurope	YES	0.929	1	Entero	42.7339	25.4858	Bulgaria	Europe	Human	H. pylori	Ubiquitous	Human	Tourrette et al., 2024, 10.1038/s41586-024-07991-z from Falush
HEL_CA4928AA_AS	NO	NO	hpEurope	YES	0.929	1	Entero	39.3999	-8.22445	Portugal	Europe	Human	H. pylori	Ubiquitous	Human	Tourrette et al., 2024, 10.1038/s41586-024-07991-z from Falush
HEL_CA5195AA_AS	NO	NO	hpEurope	YES	0.929	1	Entero	59.51	38.28	Sweden	Europe	Human	H. pylori	Ubiquitous	Human	Tourrette et al., 2024, 10.1038/s41586-024-07991-z from Falush
HEL_CA4144AA_AS	NO	NO	hpEurope	YES	0.9289	1	Entero	42.7339	25.4858	Bulgaria	Europe	Human	H. pylori	Ubiquitous	Human	Tourrette et al., 2024, 10.1038/s41586-024-07991-z from Falush
HEL_CA4327AA_AS	NO	NO	hpEurope	YES	0.9289	1	Entero	9.74892	-83.7534	Costa_Rica	North_America	Human	H. pylori	Ubiquitous	Human	Tourrette et al., 2024, 10.1038/s41586-024-07991-z from Falush
HEL_CA4674AA_AS	NO	NO	hpEurope	YES	0.9289	1	Entero	30.5852	36.2384	Jordan	West_Asia	Human	H. pylori	Ubiquitous	Human	Tourrette et al., 2024, 10.1038/s41586-024-07991-z from Falush
HEL_CA4734AA_AS	NO	NO	hpEurope	YES	0.9288	1	Entero	56.8796	24.6032	Latvia	Europe	Human	H. pylori	Ubiquitous	Human	Tourrette et al., 2024, 10.1038/s41586-024-07991-z from Falush
HEL_CA4888AA_AS	NO	NO	hpEurope	YES	0.9288	1	Entero	51.9194	19.1451	Poland	Europe	Human	H. pylori	Ubiquitous	Human	Tourrette et al., 2024, 10.1038/s41586-024-07991-z from Falush
HEL_CA4806AA_AS	NO	NO	hpEurope	YES	0.9287	1	Entero	23.6345	-102.553	Mexico	North_America	Human	H. pylori	Ubiquitous	Human	Tourrette et al., 2024, 10.1038/s41586-024-07991-z from Falush
HEL_CA4575AA_AS	NO	NO	hpEurope	YES	0.9286	1	Entero	15.2	-86.2419	Honduras	North_America	Human	H. pylori	Ubiquitous	Human	Tourrette et al., 2024, 10.1038/s41586-024-07991-z from Falush
HEL_CA4775AA_AS	NO	NO	hpEurope	YES	0.9286	1	Entero	55.1694	23.8813	Lithuania	Europe	Human	H. pylori	Ubiquitous	Human	Tourrette et al., 2024, 10.1038/s41586-024-07991-z from Falush
HEL_CA4649AA_AS	NO	NO	hpEurope	YES	0.9285	1	Entero	30.5852	36.2384	Jordan	West_Asia	Human	H. pylori	Ubiquitous	Human	Tourrette et al., 2024, 10.1038/s41586-024-07991-z from Falush
HEL_CA4729AA_AS	NO	NO	hpEurope	YES	0.9285	1	Entero	56.8796	24.6032	Latvia	Europe	Human	H. pylori	Ubiquitous	Human	Tourrette et al., 2024, 10.1038/s41586-024-07991-z from Falush
HEL_BA3577AA_AS	NO	NO	hpEurope	YES	0.9284	1	Entero	51.1657	10.4515	Germany	Europe	Human	H. pylori	Ubiquitous	Human	Ailloud et al., 2019, 10.1038/s41467-019-10050-1
HEL_CA4379AA_AS	NO	NO	hpEurope	YES	0.9284	1	Entero	-35.6751	-71.543	Chile	South_America	Human	H. pylori	Ubiquitous	Human	Tourrette et al., 2024, 10.1038/s41586-024-07991-z from Falush
HEL_CA4351AA_AS	NO	NO	hpEurope	YES	0.9284	1	Entero	18.7357	-70.1627	Dominican_Republic	South_America	Human	H. pylori	Ubiquitous	Human	Tourrette et al., 2024, 10.1038/s41586-024-07991-z from Falush
HEL_CA4380AA_AS	NO	NO	hpEurope	YES	0.9282	1	Entero	-33.724	-71.015	Chile	South_America	Human	H. pylori	Ubiquitous	Human	Tourrette et al., 2024, 10.1038/s41586-024-07991-z from Falush
HEL_CA4969AA_AS	NO	NO	hpEurope	YES	0.9282	1	Entero	40.45	-3.25	Spain	Europe	Human	H. pylori	Ubiquitous	Human	Tourrette et al., 2024, 10.1038/s41586-024-07991-z from Falush
HEL_CA4740AA_AS	NO	NO	hpEurope	YES	0.9281	1	Entero	56.8796	24.6032	Latvia	Europe	Human	H. pylori	Ubiquitous	Human	Tourrette et al., 2024, 10.1038/s41586-024-07991-z from Falush
HEL_CA4739AA_AS	NO	NO	hpEurope	YES	0.928	1	Entero	56.8796	24.6032	Latvia	Europe	Human	H. pylori	Ubiquitous	Human	Tourrette et al., 2024, 10.1038/s41586-024-07991-z from Falush
HEL_CA4352AA_AS	NO	NO	hpEurope	YES	0.9279	1	Entero	4.57087	-74.2973	Colombia	South_America	Human	H. pylori	Ubiquitous	Human	Tourrette et al., 2024, 10.1038/s41586-024-07991-z from Falush
HEL_CA5728AA_AS	NO	NO	hpEurope	YES	0.9279	1	Entero	38.9637	35.2433	Turkey	Europe	Human	H. pylori	Ubiquitous	Human	Tourrette et al., 2024, 10.1038/s41586-024-07991-z from Falush
HEL_CA4431AA_AS	NO	NO	hpEurope	YES	0.9278	1	Entero	28.0339	1.65963	Algeria	Africa	Human	H. pylori	Ubiquitous	Human	Tourrette et al., 2024, 10.1038/s41586-024-07991-z from Falush
HEL_CA5223AA_AS	NO	NO	hpEurope	YES	0.9278	1	Entero	59.51	38.28	Sweden	Europe	Human	H. pylori	Ubiquitous	Human	Tourrette et al., 2024, 10.1038/s41586-024-07991-z from Falush
HEL_CA4868AA_AS	NO	NO	hpEurope	YES	0.9277	1	Entero	-9.18997	-75.0152	Peru	South_America	Human	H. pylori	Ubiquitous	Human	Tourrette et al., 2024, 10.1038/s41586-024-07991-z from Falush
HEL_CA5787AA_AS	NO	NO	hpEurope	YES	0.9277	1	Entero	38.7946	-106.535	United_States	North_America	Human	H. pylori	Ubiquitous	Human	Tourrette et al., 2024, 10.1038/s41586-024-07991-z from Falush
HEL_CA4534AA_AS	NO	NO	hpEurope	YES	0.9276	1	Entero	15.2	-86.2419	Honduras	North_America	Human	H. pylori	Ubiquitous	Human	Tourrette et al., 2024, 10.1038/s41586-024-07991-z from Falush
HEL_CA4257AA_AS	NO	NO	hpEurope	YES	0.9275	1	Entero	-35.6751	-71.543	Chile	South_America	Human	H. pylori	Ubiquitous	Human	Tourrette et al., 2024, 10.1038/s41586-024-07991-z from Falush
HEL_CA4891AA_AS	NO	NO	hpEurope	YES	0.9275	1	Entero	51.9194	19.1451	Poland	Europe	Human	H. pylori	Ubiquitous	Human	Tourrette et al., 2024, 10.1038/s41586-024-07991-z from Falush
HEL_CA4515AA_AS	NO	NO	hpEurope	YES	0.9274	1	Entero	39.0742	21.8243	Greece	Europe	Human	H. pylori	Ubiquitous	Human	Tourrette et al., 2024, 10.1038/s41586-024-07991-z from Falush
HEL_CA5073AA_AS	NO	NO	hpEurope	YES	0.9274	1	Entero	40.45	-3.25	Spain	Europe	Human	H. pylori	Ubiquitous	Human	Tourrette et al., 2024, 10.1038/s41586-024-07991-z from Falush
HEL_CA4601AA_AS	NO	NO	hpEurope	YES	0.9273	1	Entero	41.8719	12.5674	Italy	Europe	Human	H. pylori	Ubiquitous	Human	Tourrette et al., 2024, 10.1038/s41586-024-07991-z from Falush
HEL_CA4341AA_AS	NO	NO	hpEurope	YES	0.9272	1	Entero	4.57087	-74.2973	Colombia	South_America	Human	H. pylori	Ubiquitous	Human	Tourrette et al., 2024, 10.1038/s41586-024-07991-z from Falush
HEL_CA4491AA_AS	NO	NO	hpEurope	YES	0.9272	1	Entero	39.0742	21.8243	Greece	Europe	Human	H. pylori	Ubiquitous	Human	Tourrette et al., 2024, 10.1038/s41586-024-07991-z from Falush
HEL_CA4608AA_AS	NO	NO	hpEurope	YES	0.9271	1	Entero	41.8719	12.5674	Italy	Europe	Human	H. pylori	Ubiquitous	Human	Tourrette et al., 2024, 10.1038/s41586-024-07991-z from Falush
HEL_CA4760AA_AS	NO	NO	hpEurope	YES	0.9271	1	Entero	55.1694	23.8813	Lithuania	Europe	Human	H. pylori	Ubiquitous	Human	Tourrette et al., 2024, 10.1038/s41586-024-07991-z from Falush
HEL_CA4726AA_AS	NO	NO	hpEurope	YES	0.927	1	Entero	56.8796	24.6032	Latvia	Europe	Human	H. pylori	Ubiquitous	Human	Tourrette et al., 2024, 10.1038/s41586-024-07991-z from Falush
HEL_CA4847AA_AS	NO	NO	hpEurope	YES	0.9268	1	Entero	-9.18997	-75.0152	Peru	South_America	Human	H. pylori	Ubiquitous	Human	Tourrette et al., 2024, 10.1038/s41586-024-07991-z from Falush
HEL_CA5010AA_AS	NO	NO	hpEurope	YES	0.9268	1	Entero	40.45	-3.25	Spain	Europe	Human	H. pylori	Ubiquitous	Human	Tourrette et al., 2024, 10.1038/s41586-024-07991-z from Falush
HEL_CA4722AA_AS	NO	NO	hpEurope	YES	0.9267	1	Entero	56.8796	24.6032	Latvia	Europe	Human	H. pylori	Ubiquitous	Human	Tourrette et al., 2024, 10.1038/s41586-024-07991-z from Falush
HEL_CA5696AA_AS	NO	NO	hpEurope	YES	0.9267	1	Entero	38.7946	-106.535	United_States	North_America	Human	H. pylori	Ubiquitous	Human	Tourrette et al., 2024, 10.1038/s41586-024-07991-z from Falush
HEL_CA4610AA_AS	NO	NO	hpEurope	YES	0.9266	1	Entero	41.8719	12.5674	Italy	Europe	Human	H. pylori	Ubiquitous	Human	Tourrette et al., 2024, 10.1038/s41586-024-07991-z from Falush
HEL_CA4930AA_AS	NO	NO	hpEurope	YES	0.9266	1	Entero	39.3999	-8.22445	Portugal	Europe	Human	H. pylori	Ubiquitous	Human	Tourrette et al., 2024, 10.1038/s41586-024-07991-z from Falush
HEL_CA5022AA_AS	NO	NO	hpEurope	YES	0.9265	1	Entero	40.45	-3.25	Spain	Europe	Human	H. pylori	Ubiquitous	Human	Tourrette et al., 2024, 10.1038/s41586-024-07991-z from Falush
HEL_CA4531AA_AS	NO	NO	hpEurope	YES	0.9263	1	Entero	15.7835	-90.2308	Guatemala	North_America	Human	H. pylori	Ubiquitous	Human	Tourrette et al., 2024, 10.1038/s41586-024-07991-z from Falush
HEL_CA4489AA_AS	NO	NO	hpEurope	YES	0.9262	1	Entero	46.2276	2.21375	France	Europe	Human	H. pylori	Ubiquitous	Human	Tourrette et al., 2024, 10.1038/s41586-024-07991-z from Falush
HEL_CA4741AA_AS	NO	NO	hpEurope	YES	0.9261	1	Entero	56.8796	24.6032	Latvia	Europe	Human	H. pylori	Ubiquitous	Human	Tourrette et al., 2024, 10.1038/s41586-024-07991-z from Falush
HEL_CA4539AA_AS	NO	NO	hpEurope	YES	0.926	1	Entero	64.9631	-19.0208	Iceland	Europe	Human	H. pylori	Ubiquitous	Human	Tourrette et al., 2024, 10.1038/s41586-024-07991-z from Falush
HEL_CA5018AA_AS	NO	NO	hpEurope	YES	0.926	1	Entero	40.45	-3.25	Spain	Europe	Human	H. pylori	Ubiquitous	Human	Tourrette et al., 2024, 10.1038/s41586-024-07991-z from Falush
HEL_CA4251AA_AS	NO	NO	hpEurope	YES	0.9259	1	Entero	-35.6751	-71.543	Chile	South_America	Human	H. pylori	Ubiquitous	Human	Tourrette et al., 2024, 10.1038/s41586-024-07991-z from Falush
HEL_CA4664AA_AS	NO	NO	hpEurope	YES	0.9256	1	Entero	30.5852	36.2384	Jordan	West_Asia	Human	H. pylori	Ubiquitous	Human	Tourrette et al., 2024, 10.1038/s41586-024-07991-z from Falush
HEL_CA4748AA_AS	NO	NO	hpEurope	YES	0.9256	1	Entero	56.8796	24.6032	Latvia	Europe	Human	H. pylori	Ubiquitous	Human	Tourrette et al., 2024, 10.1038/s41586-024-07991-z from Falush
HEL_CA5023AA_AS	NO	NO	hpEurope	YES	0.9256	1	Entero	40.45	-3.25	Spain	Europe	Human	H. pylori	Ubiquitous	Human	Tourrette et al., 2024, 10.1038/s41586-024-07991-z from Falush
HEL_CA4398AA_AS	NO	NO	hpEurope	YES	0.9254	1	Entero	-35.6751	-71.543	Chile	South_America	Human	H. pylori	Ubiquitous	Human	Tourrette et al., 2024, 10.1038/s41586-024-07991-z from Falush
HEL_CA4494AA_AS	NO	NO	hpEurope	YES	0.9254	1	Entero	46.2276	2.21375	France	Europe	Human	H. pylori	Ubiquitous	Human	Tourrette et al., 2024, 10.1038/s41586-024-07991-z from Falush
HEL_CA4237AA_AS	NO	NO	hpEurope	YES	0.9253	1	Entero	-35.6751	-71.543	Chile	South_America	Human	H. pylori	Ubiquitous	Human	Tourrette et al., 2024, 10.1038/s41586-024-07991-z from Falush
HEL_CA4611AA_AS	NO	NO	hpEurope	YES	0.9252	1	Entero	41.8719	12.5674	Italy	Europe	Human	H. pylori	Ubiquitous	Human	Tourrette et al., 2024, 10.1038/s41586-024-07991-z from Falush
HEL_CA4977AA_AS	NO	NO	hpEurope	YES	0.9252	1	Entero	40.45	-3.25	Spain	Europe	Human	H. pylori	Ubiquitous	Human	Tourrette et al., 2024, 10.1038/s41586-024-07991-z from Falush
HEL_CA5068AA_AS	NO	NO	hpEurope	YES	0.9252	1	Entero	40.45	-3.25	Spain	Europe	Human	H. pylori	Ubiquitous	Human	Tourrette et al., 2024, 10.1038/s41586-024-07991-z from Falush
HEL_CA5016AA_AS	NO	NO	hpEurope	YES	0.9252	1	Entero	40.45	-3.25	Spain	Europe	Human	H. pylori	Ubiquitous	Human	Tourrette et al., 2024, 10.1038/s41586-024-07991-z from Falush
HEL_CA5201AA_AS	NO	NO	hpEurope	YES	0.9252	1	Entero	46.8182	8.22751	Switzerland	Europe	Human	H. pylori	Ubiquitous	Human	Tourrette et al., 2024, 10.1038/s41586-024-07991-z from Falush
HEL_CA4825AA_AS	NO	NO	hpEurope	YES	0.9251	1	Entero	23.6345	-102.553	Mexico	North_America	Human	H. pylori	Ubiquitous	Human	Tourrette et al., 2024, 10.1038/s41586-024-07991-z from Falush
HEL_CA4995AA_AS	NO	NO	hpEurope	YES	0.9251	1	Entero	40.45	-3.25	Spain	Europe	Human	H. pylori	Ubiquitous	Human	Tourrette et al., 2024, 10.1038/s41586-024-07991-z from Falush
HEL_BA3579AA_AS	NO	NO	hpEurope	YES	0.925	1	Entero	51.1657	10.4515	Germany	Europe	Human	H. pylori	Ubiquitous	Human	Ailloud et al., 2019, 10.1038/s41467-019-10050-1
HEL_CA4372AA_AS	NO	NO	hpEurope	YES	0.925	1	Entero	4.57087	-74.2973	Colombia	South_America	Human	H. pylori	Ubiquitous	Human	Tourrette et al., 2024, 10.1038/s41586-024-07991-z from Falush
HEL_CA5727AA_AS	NO	NO	hpEurope	YES	0.9249	1	Entero	38.9637	35.2433	Turkey	Europe	Human	H. pylori	Ubiquitous	Human	Tourrette et al., 2024, 10.1038/s41586-024-07991-z from Falush
HEL_CA4866AA_AS	NO	NO	hpEurope	YES	0.9248	1	Entero	-9.18997	-75.0152	Peru	South_America	Human	H. pylori	Ubiquitous	Human	Tourrette et al., 2024, 10.1038/s41586-024-07991-z from Falush
HEL_CA4256AA_AS	NO	NO	hpEurope	YES	0.9247	1	Entero	4.57087	-74.2973	Colombia	South_America	Human	H. pylori	Ubiquitous	Human	Tourrette et al., 2024, 10.1038/s41586-024-07991-z from Falush
HEL_CA4364AA_AS	NO	NO	hpEurope	YES	0.9247	1	Entero	4.57087	-74.2973	Colombia	South_America	Human	H. pylori	Ubiquitous	Human	Tourrette et al., 2024, 10.1038/s41586-024-07991-z from Falush
HEL_CA4468AA_AS	NO	NO	hpEurope	YES	0.9247	1	Entero	51.1657	10.4515	Germany	Europe	Human	H. pylori	Ubiquitous	Human	Tourrette et al., 2024, 10.1038/s41586-024-07991-z from Falush
HEL_CA4772AA_AS	NO	NO	hpEurope	YES	0.9247	1	Entero	55.1694	23.8813	Lithuania	Europe	Human	H. pylori	Ubiquitous	Human	Tourrette et al., 2024, 10.1038/s41586-024-07991-z from Falush
HEL_BA3537AA_AS	NO	NO	hpEurope	YES	0.9246	1	Entero	23.6345	-102.553	Mexico	North_America	Human	H. pylori	Ubiquitous	Human	Camorlinga-Ponce et al., 2021, 10.3389/fcimb.2020.539115
HEL_CA4366AA_AS	NO	NO	hpEurope	YES	0.9246	1	Entero	4.57087	-74.2973	Colombia	South_America	Human	H. pylori	Ubiquitous	Human	Tourrette et al., 2024, 10.1038/s41586-024-07991-z from Falush
HEL_CA4321AA_AS	NO	NO	hpEurope	YES	0.9246	1	Entero	9.74892	-83.7534	Costa_Rica	North_America	Human	H. pylori	Ubiquitous	Human	Tourrette et al., 2024, 10.1038/s41586-024-07991-z from Falush
HEL_CA4556AA_AS	NO	NO	hpEurope	YES	0.9246	1	Entero	39.0742	21.8243	Greece	Europe	Human	H. pylori	Ubiquitous	Human	Tourrette et al., 2024, 10.1038/s41586-024-07991-z from Falush
HEL_CA4690AA_AS	NO	NO	hpEurope	YES	0.9246	1	Entero	41.2044	74.7661	Kyrgyzstan	Central_Asia	Human	H. pylori	Ubiquitous	Human	Tourrette et al., 2024, 10.1038/s41586-024-07991-z from Falush
HEL_CA4802AA_AS	NO	NO	hpEurope	YES	0.9245	1	Entero	23.6345	-102.553	Mexico	North_America	Human	H. pylori	Ubiquitous	Human	Tourrette et al., 2024, 10.1038/s41586-024-07991-z from Falush
HEL_CA4883AA_AS	NO	NO	hpEurope	YES	0.9245	1	Entero	51.9194	19.1451	Poland	Europe	Human	H. pylori	Ubiquitous	Human	Tourrette et al., 2024, 10.1038/s41586-024-07991-z from Falush
HEL_CA4746AA_AS	NO	NO	hpEurope	YES	0.9244	1	Entero	56.8796	24.6032	Latvia	Europe	Human	H. pylori	Ubiquitous	Human	Tourrette et al., 2024, 10.1038/s41586-024-07991-z from Falush
HEL_CA4504AA_AS	NO	NO	hpEurope	YES	0.9243	1	Entero	51.1657	10.4515	Germany	Europe	Human	H. pylori	Ubiquitous	Human	Tourrette et al., 2024, 10.1038/s41586-024-07991-z from Falush
HEL_CA4953AA_AS	NO	NO	hpEurope	YES	0.9243	1	Entero	49.26	136.32	Russia	North_Asia	Human	H. pylori	Ubiquitous	Human	Tourrette et al., 2024, 10.1038/s41586-024-07991-z from Falush
HEL_CA4667AA_AS	NO	NO	hpEurope	YES	0.9242	1	Entero	30.5852	36.2384	Jordan	West_Asia	Human	H. pylori	Ubiquitous	Human	Tourrette et al., 2024, 10.1038/s41586-024-07991-z from Falush
HEL_CA4855AA_AS	NO	NO	hpEurope	YES	0.9241	1	Entero	-9.18997	-75.0152	Peru	South_America	Human	H. pylori	Ubiquitous	Human	Tourrette et al., 2024, 10.1038/s41586-024-07991-z from Falush
HEL_CA5015AA_AS	NO	NO	hpEurope	YES	0.924	1	Entero	40.45	-3.25	Spain	Europe	Human	H. pylori	Ubiquitous	Human	Tourrette et al., 2024, 10.1038/s41586-024-07991-z from Falush
HEL_CA4890AA_AS	NO	NO	hpEurope	YES	0.9239	1	Entero	51.9194	19.1451	Poland	Europe	Human	H. pylori	Ubiquitous	Human	Tourrette et al., 2024, 10.1038/s41586-024-07991-z from Falush
HEL_BA3545AA_AS	NO	NO	hpEurope	YES	0.9238	1	Entero	23.6345	-102.553	Mexico	North_America	Human	H. pylori	Ubiquitous	Human	Camorlinga-Ponce et al., 2021, 10.3389/fcimb.2020.539115
HEL_CA5076AA_AS	NO	NO	hpEurope	YES	0.9238	1	Entero	59.51	38.28	Sweden	Europe	Human	H. pylori	Ubiquitous	Human	Tourrette et al., 2024, 10.1038/s41586-024-07991-z from Falush
HEL_BA3565AA_AS	NO	NO	hpEurope	YES	0.9237	1	Entero	35.9078	127.767	South_Korea	East_Asia	Human	H. pylori	Ubiquitous	Human	Su et al., 2019, 10.1038/s41598-019-47240-2
HEL_CA4241AA_AS	NO	NO	hpEurope	YES	0.9237	1	Entero	-35.6751	-71.543	Chile	South_America	Human	H. pylori	Ubiquitous	Human	Tourrette et al., 2024, 10.1038/s41586-024-07991-z from Falush
HEL_CA4262AA_AS	NO	NO	hpEurope	YES	0.9237	1	Entero	-35.6751	-71.543	Chile	South_America	Human	H. pylori	Ubiquitous	Human	Tourrette et al., 2024, 10.1038/s41586-024-07991-z from Falush
HEL_CA4924AA_AS	NO	NO	hpEurope	YES	0.9237	1	Entero	39.3999	-8.22445	Portugal	Europe	Human	H. pylori	Ubiquitous	Human	Tourrette et al., 2024, 10.1038/s41586-024-07991-z from Falush
HEL_CA4940AA_AS	NO	NO	hpEurope	YES	0.9236	1	Entero	49.26	136.32	Russia	North_Asia	Human	H. pylori	Ubiquitous	Human	Tourrette et al., 2024, 10.1038/s41586-024-07991-z from Falush
HEL_CA4177AA_AS	NO	NO	hpEurope	YES	0.9235	1	Entero	42.7339	25.4858	Bulgaria	Europe	Human	H. pylori	Ubiquitous	Human	Tourrette et al., 2024, 10.1038/s41586-024-07991-z from Falush
HEL_CA4593AA_AS	NO	NO	hpEurope	YES	0.9234	1	Entero	41.8719	12.5674	Italy	Europe	Human	H. pylori	Ubiquitous	Human	Tourrette et al., 2024, 10.1038/s41586-024-07991-z from Falush
HEL_CA4853AA_AS	NO	NO	hpEurope	YES	0.9234	1	Entero	-9.18997	-75.0152	Peru	South_America	Human	H. pylori	Ubiquitous	Human	Tourrette et al., 2024, 10.1038/s41586-024-07991-z from Falush
HEL_CA4904AA_AS	NO	NO	hpEurope	YES	0.9233	1	Entero	39.3999	-8.22445	Portugal	Europe	Human	H. pylori	Ubiquitous	Human	Tourrette et al., 2024, 10.1038/s41586-024-07991-z from Falush
HEL_CA4981AA_AS	NO	NO	hpEurope	YES	0.9233	1	Entero	40.45	-3.25	Spain	Europe	Human	H. pylori	Ubiquitous	Human	Tourrette et al., 2024, 10.1038/s41586-024-07991-z from Falush
HEL_CA5030AA_AS	NO	NO	hpEurope	YES	0.9233	1	Entero	40.45	-3.25	Spain	Europe	Human	H. pylori	Ubiquitous	Human	Tourrette et al., 2024, 10.1038/s41586-024-07991-z from Falush
HEL_CA4662AA_AS	NO	NO	hpEurope	YES	0.9232	1	Entero	30.5852	36.2384	Jordan	West_Asia	Human	H. pylori	Ubiquitous	Human	Tourrette et al., 2024, 10.1038/s41586-024-07991-z from Falush
HEL_CA5708AA_AS	NO	NO	hpEurope	YES	0.9232	1	Entero	38.7946	-106.535	United_States	North_America	Human	H. pylori	Ubiquitous	Human	Tourrette et al., 2024, 10.1038/s41586-024-07991-z from Falush
HEL_BA3559AA_AS	NO	NO	hpEurope	YES	0.923	1	Entero	35.9078	127.767	South_Korea	East_Asia	Human	H. pylori	Ubiquitous	Human	Su et al., 2019, 10.1038/s41598-019-47240-2
HEL_CA4217AA_AS	NO	NO	hpEurope	YES	0.9229	1	Entero	-35.6751	-71.543	Chile	South_America	Human	H. pylori	Ubiquitous	Human	Tourrette et al., 2024, 10.1038/s41586-024-07991-z from Falush
HEL_CA4647AA_AS	NO	NO	hpEurope	YES	0.9229	1	Entero	30.5852	36.2384	Jordan	West_Asia	Human	H. pylori	Ubiquitous	Human	Tourrette et al., 2024, 10.1038/s41586-024-07991-z from Falush
HEL_CA4666AA_AS	NO	NO	hpEurope	YES	0.9229	1	Entero	41.2044	74.7661	Kyrgyzstan	Central_Asia	Human	H. pylori	Ubiquitous	Human	Tourrette et al., 2024, 10.1038/s41586-024-07991-z from Falush
HEL_CA4828AA_AS	NO	NO	hpEurope	YES	0.9229	1	Entero	23.6345	-102.553	Mexico	North_America	Human	H. pylori	Ubiquitous	Human	Tourrette et al., 2024, 10.1038/s41586-024-07991-z from Falush
HEL_CA6194AA_AS	NO	NO	hpEurope	YES	0.9228	1	Entero	36.2048	138.253	Japan	East_Asia	Human	H. pylori	Ubiquitous	Human	Tourrette et al., 2024, 10.1038/s41586-024-07991-z from Falush
HEL_CA4348AA_AS	NO	NO	hpEurope	YES	0.9227	1	Entero	4.57087	-74.2973	Colombia	South_America	Human	H. pylori	Ubiquitous	Human	Tourrette et al., 2024, 10.1038/s41586-024-07991-z from Falush
HEL_CA4605AA_AS	NO	NO	hpEurope	YES	0.9227	1	Entero	41.8719	12.5674	Italy	Europe	Human	H. pylori	Ubiquitous	Human	Tourrette et al., 2024, 10.1038/s41586-024-07991-z from Falush
HEL_CA4571AA_AS	NO	NO	hpEurope	YES	0.9226	1	Entero	15.2	-86.2419	Honduras	North_America	Human	H. pylori	Ubiquitous	Human	Tourrette et al., 2024, 10.1038/s41586-024-07991-z from Falush
HEL_CA4872AA_AS	NO	NO	hpEurope	YES	0.9226	1	Entero	-9.18997	-75.0152	Peru	South_America	Human	H. pylori	Ubiquitous	Human	Tourrette et al., 2024, 10.1038/s41586-024-07991-z from Falush
HEL_CA4862AA_AS	NO	NO	hpEurope	YES	0.9225	1	Entero	-9.18997	-75.0152	Peru	South_America	Human	H. pylori	Ubiquitous	Human	Tourrette et al., 2024, 10.1038/s41586-024-07991-z from Falush
HEL_CA4328AA_AS	NO	NO	hpEurope	YES	0.9223	1	Entero	4.57087	-74.2973	Colombia	South_America	Human	H. pylori	Ubiquitous	Human	Tourrette et al., 2024, 10.1038/s41586-024-07991-z from Falush
HEL_CA4394AA_AS	NO	NO	hpEurope	YES	0.9221	1	Entero	-35.6751	-71.543	Chile	South_America	Human	H. pylori	Ubiquitous	Human	Tourrette et al., 2024, 10.1038/s41586-024-07991-z from Falush
HEL_CA4801AA_AS	NO	NO	hpEurope	YES	0.922	1	Entero	23.6345	-102.553	Mexico	North_America	Human	H. pylori	Ubiquitous	Human	Tourrette et al., 2024, 10.1038/s41586-024-07991-z from Falush
HEL_CA4333AA_AS	NO	NO	hpEurope	YES	0.9219	1	Entero	4.57087	-74.2973	Colombia	South_America	Human	H. pylori	Ubiquitous	Human	Tourrette et al., 2024, 10.1038/s41586-024-07991-z from Falush
HEL_CA5087AA_AS	NO	NO	hpEurope	YES	0.9219	1	Entero	59.51	38.28	Sweden	Europe	Human	H. pylori	Ubiquitous	Human	Tourrette et al., 2024, 10.1038/s41586-024-07991-z from Falush
HEL_AA0376AA_AS	NO	NO	hpEurope	YES	0.9218	1	Entero	-9.18997	-75.0152	Peru	South_America	Human	H. pylori	Ubiquitous	Human	NCBI
HEL_BA3538AA_AS	NO	NO	hpEurope	YES	0.9217	1	Entero	23.6345	-102.553	Mexico	North_America	Human	H. pylori	Ubiquitous	Human	Camorlinga-Ponce et al., 2021, 10.3389/fcimb.2020.539115
HEL_CA4485AA_AS	NO	NO	hpEurope	YES	0.9217	1	Entero	46.2276	2.21375	France	Europe	Human	H. pylori	Ubiquitous	Human	Tourrette et al., 2024, 10.1038/s41586-024-07991-z from Falush
HEL_CA4462AA_AS	NO	NO	hpEurope	YES	0.9217	1	Entero	39.0742	21.8243	Greece	Europe	Human	H. pylori	Ubiquitous	Human	Tourrette et al., 2024, 10.1038/s41586-024-07991-z from Falush
HEL_CA4980AA_AS	NO	NO	hpEurope	YES	0.9217	1	Entero	40.45	-3.25	Spain	Europe	Human	H. pylori	Ubiquitous	Human	Tourrette et al., 2024, 10.1038/s41586-024-07991-z from Falush
HEL_CA4656AA_AS	NO	NO	hpEurope	YES	0.9216	1	Entero	30.5852	36.2384	Jordan	West_Asia	Human	H. pylori	Ubiquitous	Human	Tourrette et al., 2024, 10.1038/s41586-024-07991-z from Falush
HEL_CA4923AA_AS	NO	NO	hpEurope	YES	0.9216	1	Entero	39.3999	-8.22445	Portugal	Europe	Human	H. pylori	Ubiquitous	Human	Tourrette et al., 2024, 10.1038/s41586-024-07991-z from Falush
HEL_CA4508AA_AS	NO	NO	hpEurope	YES	0.9214	1	Entero	39.0742	21.8243	Greece	Europe	Human	H. pylori	Ubiquitous	Human	Tourrette et al., 2024, 10.1038/s41586-024-07991-z from Falush
HEL_CA4724AA_AS	NO	NO	hpEurope	YES	0.9214	1	Entero	56.8796	24.6032	Latvia	Europe	Human	H. pylori	Ubiquitous	Human	Tourrette et al., 2024, 10.1038/s41586-024-07991-z from Falush
HEL_CA4411AA_AS	NO	NO	hpEurope	YES	0.9213	1	Entero	-38.4161	-63.6167	Argentina	South_America	Human	H. pylori	Ubiquitous	Human	Tourrette et al., 2024, 10.1038/s41586-024-07991-z from Falush
HEL_CA4235AA_AS	NO	NO	hpEurope	YES	0.9213	1	Entero	-35.6751	-71.543	Chile	South_America	Human	H. pylori	Ubiquitous	Human	Tourrette et al., 2024, 10.1038/s41586-024-07991-z from Falush
HEL_CA5601AA_AS	NO	NO	hpEurope	YES	0.9213	1	Entero	38.7946	-106.535	United_States	North_America	Human	H. pylori	Ubiquitous	Human	Tourrette et al., 2024, 10.1038/s41586-024-07991-z from Falush
HEL_CA4614AA_AS	NO	NO	hpEurope	YES	0.9212	1	Entero	41.8719	12.5674	Italy	Europe	Human	H. pylori	Ubiquitous	Human	Tourrette et al., 2024, 10.1038/s41586-024-07991-z from Falush
HEL_CA5458AA_AS	NO	NO	hpEurope	YES	0.9212	1	Entero	46.8182	8.22751	Switzerland	Europe	Human	H. pylori	Ubiquitous	Human	Tourrette et al., 2024, 10.1038/s41586-024-07991-z from Falush
HEL_CA4567AA_AS	NO	NO	hpEurope	YES	0.9211	1	Entero	31.0461	34.8516	Israel	West_Asia	Human	H. pylori	Ubiquitous	Human	Tourrette et al., 2024, 10.1038/s41586-024-07991-z from Falush
HEL_CA4821AA_AS	NO	NO	hpEurope	YES	0.9211	1	Entero	23.6345	-102.553	Mexico	North_America	Human	H. pylori	Ubiquitous	Human	Tourrette et al., 2024, 10.1038/s41586-024-07991-z from Falush
HEL_CA4320AA_AS	NO	NO	hpEurope	YES	0.921	1	Entero	4.57087	-74.2973	Colombia	South_America	Human	H. pylori	Ubiquitous	Human	Tourrette et al., 2024, 10.1038/s41586-024-07991-z from Falush
HEL_CA4805AA_AS	NO	NO	hpEurope	YES	0.921	1	Entero	23.6345	-102.553	Mexico	North_America	Human	H. pylori	Ubiquitous	Human	Tourrette et al., 2024, 10.1038/s41586-024-07991-z from Falush
HEL_CA4929AA_AS	NO	NO	hpEurope	YES	0.921	1	Entero	39.3999	-8.22445	Portugal	Europe	Human	H. pylori	Ubiquitous	Human	Tourrette et al., 2024, 10.1038/s41586-024-07991-z from Falush
HEL_CA4255AA_AS	NO	NO	hpEurope	YES	0.9209	1	Entero	-35.6751	-71.543	Chile	South_America	Human	H. pylori	Ubiquitous	Human	Tourrette et al., 2024, 10.1038/s41586-024-07991-z from Falush
HEL_CA4563AA_AS	NO	NO	hpEurope	YES	0.9209	1	Entero	20.5937	78.9629	India	South_Asia	Human	H. pylori	Ubiquitous	Human	Tourrette et al., 2024, 10.1038/s41586-024-07991-z from Falush
HEL_CA5182AA_AS	NO	NO	hpEurope	YES	0.9209	1	Entero	59.51	38.28	Sweden	Europe	Human	H. pylori	Ubiquitous	Human	Tourrette et al., 2024, 10.1038/s41586-024-07991-z from Falush
HEL_BA3591AA_AS	NO	NO	hpEurope	YES	0.9208	1	Entero	51.1657	10.4515	Germany	Europe	Human	H. pylori	Ubiquitous	Human	Ailloud et al., 2019, 10.1038/s41467-019-10050-1
HEL_BA3542AA_AS	NO	NO	hpEurope	YES	0.9208	1	Entero	23.6345	-102.553	Mexico	North_America	Human	H. pylori	Ubiquitous	Human	Camorlinga-Ponce et al., 2021, 10.3389/fcimb.2020.539115
HEL_CA4146AA_AS	NO	NO	hpEurope	YES	0.9208	1	Entero	-14.235	-51.9253	Brazil	South_America	Human	H. pylori	Ubiquitous	Human	Tourrette et al., 2024, 10.1038/s41586-024-07991-z from Falush
HEL_CA4728AA_AS	NO	NO	hpEurope	YES	0.9208	1	Entero	56.8796	24.6032	Latvia	Europe	Human	H. pylori	Ubiquitous	Human	Tourrette et al., 2024, 10.1038/s41586-024-07991-z from Falush
HEL_CA5044AA_AS	NO	NO	hpEurope	YES	0.9208	1	Entero	40.45	-3.25	Spain	Europe	Human	H. pylori	Ubiquitous	Human	Tourrette et al., 2024, 10.1038/s41586-024-07991-z from Falush
HEL_CA4198AA_AS	NO	NO	hpEurope	YES	0.9207	1	Entero	46.2276	2.21375	France	Europe	Human	H. pylori	Ubiquitous	Human	Tourrette et al., 2024, 10.1038/s41586-024-07991-z from Falush
HEL_CA5082AA_AS	NO	NO	hpEurope	YES	0.9207	1	Entero	59.51	38.28	Sweden	Europe	Human	H. pylori	Ubiquitous	Human	Tourrette et al., 2024, 10.1038/s41586-024-07991-z from Falush
HEL_CA4473AA_AS	NO	NO	hpEurope	YES	0.9206	1	Entero	46.2276	2.21375	France	Europe	Human	H. pylori	Ubiquitous	Human	Tourrette et al., 2024, 10.1038/s41586-024-07991-z from Falush
HEL_CA4677AA_AS	NO	NO	hpEurope	YES	0.9206	1	Entero	41.2044	74.7661	Kyrgyzstan	Central_Asia	Human	H. pylori	Ubiquitous	Human	Tourrette et al., 2024, 10.1038/s41586-024-07991-z from Falush
HEL_CA4871AA_AS	NO	NO	hpEurope	YES	0.9206	1	Entero	-9.18997	-75.0152	Peru	South_America	Human	H. pylori	Ubiquitous	Human	Tourrette et al., 2024, 10.1038/s41586-024-07991-z from Falush
HEL_CA4974AA_AS	NO	NO	hpEurope	YES	0.9206	1	Entero	40.45	-3.25	Spain	Europe	Human	H. pylori	Ubiquitous	Human	Tourrette et al., 2024, 10.1038/s41586-024-07991-z from Falush
HEL_CA5207AA_AS	NO	NO	hpEurope	YES	0.9206	1	Entero	59.51	38.28	Sweden	Europe	Human	H. pylori	Ubiquitous	Human	Tourrette et al., 2024, 10.1038/s41586-024-07991-z from Falush
HEL_CA4753AA_AS	NO	NO	hpEurope	YES	0.9204	1	Entero	56.8796	24.6032	Latvia	Europe	Human	H. pylori	Ubiquitous	Human	Tourrette et al., 2024, 10.1038/s41586-024-07991-z from Falush
HEL_CA4860AA_AS	NO	NO	hpEurope	YES	0.9204	1	Entero	-9.18997	-75.0152	Peru	South_America	Human	H. pylori	Ubiquitous	Human	Tourrette et al., 2024, 10.1038/s41586-024-07991-z from Falush
HEL_CA4525AA_AS	NO	NO	hpEurope	YES	0.9203	1	Entero	-0.789275	113.921	Indonesia	Southeast_Asia	Human	H. pylori	Ubiquitous	Human	Tourrette et al., 2024, 10.1038/s41586-024-07991-z from Falush
HEL_CA4725AA_AS	NO	NO	hpEurope	YES	0.9203	1	Entero	56.8796	24.6032	Latvia	Europe	Human	H. pylori	Ubiquitous	Human	Tourrette et al., 2024, 10.1038/s41586-024-07991-z from Falush
HEL_CA4907AA_AS	NO	NO	hpEurope	YES	0.9203	1	Entero	39.3999	-8.22445	Portugal	Europe	Human	H. pylori	Ubiquitous	Human	Tourrette et al., 2024, 10.1038/s41586-024-07991-z from Falush
HEL_CA4916AA_AS	NO	NO	hpEurope	YES	0.9203	1	Entero	39.3999	-8.22445	Portugal	Europe	Human	H. pylori	Ubiquitous	Human	Tourrette et al., 2024, 10.1038/s41586-024-07991-z from Falush
HEL_CA4819AA_AS	NO	NO	hpEurope	YES	0.9201	1	Entero	23.6345	-102.553	Mexico	North_America	Human	H. pylori	Ubiquitous	Human	Tourrette et al., 2024, 10.1038/s41586-024-07991-z from Falush
HEL_AA0390AA_AS	NO	NO	hpEurope	YES	0.92	1	Entero	38.7946	-106.535	United_States	North_America	Human	H. pylori	Ubiquitous	Human	Linz et al., 2014, 10.1038/ncomms5165
HEL_CA5056AA_AS	NO	NO	hpEurope	YES	0.92	1	Entero	40.45	-3.25	Spain	Europe	Human	H. pylori	Ubiquitous	Human	Tourrette et al., 2024, 10.1038/s41586-024-07991-z from Falush
HEL_CA4680AA_AS	NO	NO	hpEurope	YES	0.9199	1	Entero	41.2044	74.7661	Kyrgyzstan	Central_Asia	Human	H. pylori	Ubiquitous	Human	Tourrette et al., 2024, 10.1038/s41586-024-07991-z from Falush
HEL_BA3540AA_AS	NO	NO	hpEurope	YES	0.9197	1	Entero	23.6345	-102.553	Mexico	North_America	Human	H. pylori	Ubiquitous	Human	Camorlinga-Ponce et al., 2021, 10.3389/fcimb.2020.539115
HEL_CA4732AA_AS	NO	NO	hpEurope	YES	0.9197	1	Entero	56.8796	24.6032	Latvia	Europe	Human	H. pylori	Ubiquitous	Human	Tourrette et al., 2024, 10.1038/s41586-024-07991-z from Falush
HEL_CA4362AA_AS	NO	NO	hpEurope	YES	0.9196	1	Entero	4.57087	-74.2973	Colombia	South_America	Human	H. pylori	Ubiquitous	Human	Tourrette et al., 2024, 10.1038/s41586-024-07991-z from Falush
HEL_CA4804AA_AS	NO	NO	hpEurope	YES	0.9196	1	Entero	23.6345	-102.553	Mexico	North_America	Human	H. pylori	Ubiquitous	Human	Tourrette et al., 2024, 10.1038/s41586-024-07991-z from Falush
HEL_CA4994AA_AS	NO	NO	hpEurope	YES	0.9196	1	Entero	46.8182	8.22751	Switzerland	Europe	Human	H. pylori	Ubiquitous	Human	Tourrette et al., 2024, 10.1038/s41586-024-07991-z from Falush
HEL_CA4336AA_AS	NO	NO	hpEurope	YES	0.9195	1	Entero	4.57087	-74.2973	Colombia	South_America	Human	H. pylori	Ubiquitous	Human	Tourrette et al., 2024, 10.1038/s41586-024-07991-z from Falush
HEL_CA4932AA_AS	NO	NO	hpEurope	YES	0.9195	1	Entero	49.26	136.32	Russia	North_Asia	Human	H. pylori	Ubiquitous	Human	Tourrette et al., 2024, 10.1038/s41586-024-07991-z from Falush
HEL_BA3534AA_AS	NO	NO	hpEurope	YES	0.9194	1	Entero	23.6345	-102.553	Mexico	North_America	Human	H. pylori	Ubiquitous	Human	Camorlinga-Ponce et al., 2021, 10.3389/fcimb.2020.539115
HEL_CA4105AA_AS	NO	NO	hpEurope	YES	0.9194	1	Entero	-14.235	-51.9253	Brazil	South_America	Human	H. pylori	Ubiquitous	Human	Tourrette et al., 2024, 10.1038/s41586-024-07991-z from Falush
HEL_CA4663AA_AS	NO	NO	hpEurope	YES	0.9194	1	Entero	48.0196	66.9237	Kazakhstan	Central_Asia	Human	H. pylori	Ubiquitous	Human	Tourrette et al., 2024, 10.1038/s41586-024-07991-z from Falush
HEL_CA5080AA_AS	NO	NO	hpEurope	YES	0.9194	1	Entero	59.51	38.28	Sweden	Europe	Human	H. pylori	Ubiquitous	Human	Tourrette et al., 2024, 10.1038/s41586-024-07991-z from Falush
HEL_CA5725AA_AS	NO	NO	hpEurope	YES	0.9194	1	Entero	38.9637	35.2433	Turkey	Europe	Human	H. pylori	Ubiquitous	Human	Tourrette et al., 2024, 10.1038/s41586-024-07991-z from Falush
HEL_CA5001AA_AS	NO	NO	hpEurope	YES	0.9193	1	Entero	40.45	-3.25	Spain	Europe	Human	H. pylori	Ubiquitous	Human	Tourrette et al., 2024, 10.1038/s41586-024-07991-z from Falush
HEL_CA4975AA_AS	NO	NO	hpEurope	YES	0.9191	1	Entero	40.45	-3.25	Spain	Europe	Human	H. pylori	Ubiquitous	Human	Tourrette et al., 2024, 10.1038/s41586-024-07991-z from Falush
HEL_CA5050AA_AS	NO	NO	hpEurope	YES	0.919	1	Entero	40.45	-3.25	Spain	Europe	Human	H. pylori	Ubiquitous	Human	Tourrette et al., 2024, 10.1038/s41586-024-07991-z from Falush
HEL_CA4477AA_AS	NO	NO	hpEurope	YES	0.9189	1	Entero	51.1657	10.4515	Germany	Europe	Human	H. pylori	Ubiquitous	Human	Tourrette et al., 2024, 10.1038/s41586-024-07991-z from Falush
HEL_CA4616AA_AS	NO	NO	hpEurope	YES	0.9189	1	Entero	41.8719	12.5674	Italy	Europe	Human	H. pylori	Ubiquitous	Human	Tourrette et al., 2024, 10.1038/s41586-024-07991-z from Falush
HEL_CA5618AA_AS	NO	NO	hpEurope	YES	0.9189	1	Entero	38.7946	-106.535	United_States	North_America	Human	H. pylori	Ubiquitous	Human	Tourrette et al., 2024, 10.1038/s41586-024-07991-z from Falush
HEL_CA5608AA_AS	NO	NO	hpEurope	YES	0.9189	1	Entero	38.7946	-106.535	United_States	North_America	Human	H. pylori	Ubiquitous	Human	Tourrette et al., 2024, 10.1038/s41586-024-07991-z from Falush
HEL_CA4560AA_AS	NO	NO	hpEurope	YES	0.9187	1	Entero	15.2	-86.2419	Honduras	North_America	Human	H. pylori	Ubiquitous	Human	Tourrette et al., 2024, 10.1038/s41586-024-07991-z from Falush
HEL_CA5638AA_AS	NO	NO	hpEurope	YES	0.9187	1	Entero	38.7946	-106.535	United_States	North_America	Human	H. pylori	Ubiquitous	Human	Tourrette et al., 2024, 10.1038/s41586-024-07991-z from Falush
HEL_CA4466AA_AS	NO	NO	hpEurope	YES	0.9186	1	Entero	51.1657	10.4515	Germany	Europe	Human	H. pylori	Ubiquitous	Human	Tourrette et al., 2024, 10.1038/s41586-024-07991-z from Falush
HEL_CA4356AA_AS	NO	NO	hpEurope	YES	0.9185	1	Entero	4.57087	-74.2973	Colombia	South_America	Human	H. pylori	Ubiquitous	Human	Tourrette et al., 2024, 10.1038/s41586-024-07991-z from Falush
HEL_CA4528AA_AS	NO	NO	hpEurope	YES	0.9185	1	Entero	15.2	-86.2419	Honduras	North_America	Human	H. pylori	Ubiquitous	Human	Tourrette et al., 2024, 10.1038/s41586-024-07991-z from Falush
HEL_CA4345AA_AS	NO	NO	hpEurope	YES	0.9184	1	Entero	4.57087	-74.2973	Colombia	South_America	Human	H. pylori	Ubiquitous	Human	Tourrette et al., 2024, 10.1038/s41586-024-07991-z from Falush
HEL_CA4854AA_AS	NO	NO	hpEurope	YES	0.9184	1	Entero	-9.18997	-75.0152	Peru	South_America	Human	H. pylori	Ubiquitous	Human	Tourrette et al., 2024, 10.1038/s41586-024-07991-z from Falush
HEL_CA5724AA_AS	NO	NO	hpEurope	YES	0.9184	1	Entero	38.7946	-106.535	United_States	North_America	Human	H. pylori	Ubiquitous	Human	Tourrette et al., 2024, 10.1038/s41586-024-07991-z from Falush
HEL_CA4350AA_AS	NO	NO	hpEurope	YES	0.9183	1	Entero	4.57087	-74.2973	Colombia	South_America	Human	H. pylori	Ubiquitous	Human	Tourrette et al., 2024, 10.1038/s41586-024-07991-z from Falush
HEL_CA4723AA_AS	NO	NO	hpEurope	YES	0.9183	1	Entero	56.8796	24.6032	Latvia	Europe	Human	H. pylori	Ubiquitous	Human	Tourrette et al., 2024, 10.1038/s41586-024-07991-z from Falush
HEL_CA4796AA_AS	NO	NO	hpEurope	YES	0.9183	1	Entero	23.6345	-102.553	Mexico	North_America	Human	H. pylori	Ubiquitous	Human	Tourrette et al., 2024, 10.1038/s41586-024-07991-z from Falush
HEL_CA4875AA_AS	NO	NO	hpEurope	YES	0.9183	1	Entero	-9.18997	-75.0152	Peru	South_America	Human	H. pylori	Ubiquitous	Human	Tourrette et al., 2024, 10.1038/s41586-024-07991-z from Falush
HEL_CA5012AA_AS	NO	NO	hpEurope	YES	0.9183	1	Entero	40.45	-3.25	Spain	Europe	Human	H. pylori	Ubiquitous	Human	Tourrette et al., 2024, 10.1038/s41586-024-07991-z from Falush
HEL_CA4658AA_AS	NO	NO	hpEurope	YES	0.9182	1	Entero	41.2044	74.7661	Kyrgyzstan	Central_Asia	Human	H. pylori	Ubiquitous	Human	Tourrette et al., 2024, 10.1038/s41586-024-07991-z from Falush
HEL_CA4370AA_AS	NO	NO	hpEurope	YES	0.9181	1	Entero	4.57087	-74.2973	Colombia	South_America	Human	H. pylori	Ubiquitous	Human	Tourrette et al., 2024, 10.1038/s41586-024-07991-z from Falush
HEL_CA4322AA_AS	NO	NO	hpEurope	YES	0.9181	1	Entero	4.57087	-74.2973	Colombia	South_America	Human	H. pylori	Ubiquitous	Human	Tourrette et al., 2024, 10.1038/s41586-024-07991-z from Falush
HEL_CA5209AA_AS	NO	NO	hpEurope	YES	0.9181	1	Entero	59.51	38.28	Sweden	Europe	Human	H. pylori	Ubiquitous	Human	Tourrette et al., 2024, 10.1038/s41586-024-07991-z from Falush
HEL_CA4863AA_AS	NO	NO	hpEurope	YES	0.918	1	Entero	-9.18997	-75.0152	Peru	South_America	Human	H. pylori	Ubiquitous	Human	Tourrette et al., 2024, 10.1038/s41586-024-07991-z from Falush
HEL_CA4927AA_AS	NO	NO	hpEurope	YES	0.918	1	Entero	39.3999	-8.22445	Portugal	Europe	Human	H. pylori	Ubiquitous	Human	Tourrette et al., 2024, 10.1038/s41586-024-07991-z from Falush
HEL_CA5448AA_AS	NO	NO	hpEurope	YES	0.918	1	Entero	46.8182	8.22751	Switzerland	Europe	Human	H. pylori	Ubiquitous	Human	Tourrette et al., 2024, 10.1038/s41586-024-07991-z from Falush
HEL_CA0055AA_AS	NO	NO	hpEurope	YES	0.9179	1	Entero	28.3949	84.124	Nepal	South_Asia	Human	H. pylori	Ubiquitous	Human	Oita University
HEL_CA4456AA_AS	NO	NO	hpEurope	YES	0.9179	1	Entero	46.2276	2.21375	France	Europe	Human	H. pylori	Ubiquitous	Human	Tourrette et al., 2024, 10.1038/s41586-024-07991-z from Falush
HEL_CA4824AA_AS	NO	NO	hpEurope	YES	0.9179	1	Entero	23.6345	-102.553	Mexico	North_America	Human	H. pylori	Ubiquitous	Human	Tourrette et al., 2024, 10.1038/s41586-024-07991-z from Falush
HEL_CA4849AA_AS	NO	NO	hpEurope	YES	0.9179	1	Entero	-9.18997	-75.0152	Peru	South_America	Human	H. pylori	Ubiquitous	Human	Tourrette et al., 2024, 10.1038/s41586-024-07991-z from Falush
HEL_CA5170AA_AS	NO	NO	hpEurope	YES	0.9179	1	Entero	46.8182	8.22751	Switzerland	Europe	Human	H. pylori	Ubiquitous	Human	Tourrette et al., 2024, 10.1038/s41586-024-07991-z from Falush
HEL_BA3580AA_AS	NO	NO	hpEurope	YES	0.9178	1	Entero	51.1657	10.4515	Germany	Europe	Human	H. pylori	Ubiquitous	Human	Ailloud et al., 2019, 10.1038/s41467-019-10050-1
HEL_CA4745AA_AS	NO	NO	hpEurope	YES	0.9178	1	Entero	56.8796	24.6032	Latvia	Europe	Human	H. pylori	Ubiquitous	Human	Tourrette et al., 2024, 10.1038/s41586-024-07991-z from Falush
HEL_CA5027AA_AS	NO	NO	hpEurope	YES	0.9178	1	Entero	40.45	-3.25	Spain	Europe	Human	H. pylori	Ubiquitous	Human	Tourrette et al., 2024, 10.1038/s41586-024-07991-z from Falush
HEL_CA4576AA_AS	NO	NO	hpEurope	YES	0.9177	1	Entero	15.7835	-90.2308	Guatemala	North_America	Human	H. pylori	Ubiquitous	Human	Tourrette et al., 2024, 10.1038/s41586-024-07991-z from Falush
HEL_CA4416AA_AS	NO	NO	hpEurope	YES	0.9176	1	Entero	28.0339	1.65963	Algeria	Africa	Human	H. pylori	Ubiquitous	Human	Tourrette et al., 2024, 10.1038/s41586-024-07991-z from Falush
HEL_AA0393AA_AS	NO	NO	hpEurope	YES	0.9175	1	Entero	36.2048	138.253	Japan	East_Asia	Human	H. pylori	Ubiquitous	Human	Satou et al., 2014, 10.1128/genomeA.00286-14
HEL_CA4761AA_AS	NO	NO	hpEurope	YES	0.9173	1	Entero	55.1694	23.8813	Lithuania	Europe	Human	H. pylori	Ubiquitous	Human	Tourrette et al., 2024, 10.1038/s41586-024-07991-z from Falush
HEL_CA4971AA_AS	NO	NO	hpEurope	YES	0.9173	1	Entero	40.45	-3.25	Spain	Europe	Human	H. pylori	Ubiquitous	Human	Tourrette et al., 2024, 10.1038/s41586-024-07991-z from Falush
HEL_BA3571AA_AS	NO	NO	hpEurope	YES	0.9172	1	Entero	51.1657	10.4515	Germany	Europe	Human	H. pylori	Ubiquitous	Human	Ailloud et al., 2019, 10.1038/s41467-019-10050-1
HEL_CA4252AA_AS	NO	NO	hpEurope	YES	0.9172	1	Entero	-35.6751	-71.543	Chile	South_America	Human	H. pylori	Ubiquitous	Human	Tourrette et al., 2024, 10.1038/s41586-024-07991-z from Falush
HEL_CA5026AA_AS	NO	NO	hpEurope	YES	0.9172	1	Entero	40.45	-3.25	Spain	Europe	Human	H. pylori	Ubiquitous	Human	Tourrette et al., 2024, 10.1038/s41586-024-07991-z from Falush
HEL_CA4478AA_AS	NO	NO	hpEurope	YES	0.9171	1	Entero	51.1657	10.4515	Germany	Europe	Human	H. pylori	Ubiquitous	Human	Tourrette et al., 2024, 10.1038/s41586-024-07991-z from Falush
HEL_CA4641AA_AS	NO	NO	hpEurope	YES	0.917	1	Entero	36.2048	138.253	Japan	East_Asia	Human	H. pylori	Ubiquitous	Human	Tourrette et al., 2024, 10.1038/s41586-024-07991-z from Falush
HEL_CA4359AA_AS	NO	NO	hpEurope	YES	0.9169	1	Entero	4.57087	-74.2973	Colombia	South_America	Human	H. pylori	Ubiquitous	Human	Tourrette et al., 2024, 10.1038/s41586-024-07991-z from Falush
HEL_CA4800AA_AS	NO	NO	hpEurope	YES	0.9169	1	Entero	23.6345	-102.553	Mexico	North_America	Human	H. pylori	Ubiquitous	Human	Tourrette et al., 2024, 10.1038/s41586-024-07991-z from Falush
HEL_CA4331AA_AS	NO	NO	hpEurope	YES	0.9168	1	Entero	4.57087	-74.2973	Colombia	South_America	Human	H. pylori	Ubiquitous	Human	Tourrette et al., 2024, 10.1038/s41586-024-07991-z from Falush
HEL_CA4467AA_AS	NO	NO	hpEurope	YES	0.9168	1	Entero	51.1657	10.4515	Germany	Europe	Human	H. pylori	Ubiquitous	Human	Tourrette et al., 2024, 10.1038/s41586-024-07991-z from Falush
HEL_CA4838AA_AS	NO	NO	hpEurope	YES	0.9167	1	Entero	28.3949	84.124	Nepal	South_Asia	Human	H. pylori	Ubiquitous	Human	Tourrette et al., 2024, 10.1038/s41586-024-07991-z from Falush
HEL_CA4951AA_AS	NO	NO	hpEurope	YES	0.9167	1	Entero	49.26	136.32	Russia	North_Asia	Human	H. pylori	Ubiquitous	Human	Tourrette et al., 2024, 10.1038/s41586-024-07991-z from Falush
HEL_CA5210AA_AS	NO	NO	hpEurope	YES	0.9167	1	Entero	40.45	-3.25	Spain	Europe	Human	H. pylori	Ubiquitous	Human	Tourrette et al., 2024, 10.1038/s41586-024-07991-z from Falush
HEL_CA4973AA_AS	NO	NO	hpEurope	YES	0.9167	1	Entero	40.45	-3.25	Spain	Europe	Human	H. pylori	Ubiquitous	Human	Tourrette et al., 2024, 10.1038/s41586-024-07991-z from Falush
HEL_BA3563AA_AS	NO	NO	hpEurope	YES	0.9166	1	Entero	46.2276	2.21375	France	Europe	Human	H. pylori	Ubiquitous	Human	Su et al., 2019, 10.1038/s41598-019-47240-2
HEL_CA4225AA_AS	NO	NO	hpEurope	YES	0.9166	1	Entero	-35.6751	-71.543	Chile	South_America	Human	H. pylori	Ubiquitous	Human	Tourrette et al., 2024, 10.1038/s41586-024-07991-z from Falush
HEL_CA4335AA_AS	NO	NO	hpEurope	YES	0.9166	1	Entero	4.57087	-74.2973	Colombia	South_America	Human	H. pylori	Ubiquitous	Human	Tourrette et al., 2024, 10.1038/s41586-024-07991-z from Falush
HEL_CA4856AA_AS	NO	NO	hpEurope	YES	0.9166	1	Entero	-9.18997	-75.0152	Peru	South_America	Human	H. pylori	Ubiquitous	Human	Tourrette et al., 2024, 10.1038/s41586-024-07991-z from Falush
HEL_CA4767AA_AS	NO	NO	hpEurope	YES	0.9165	1	Entero	55.1694	23.8813	Lithuania	Europe	Human	H. pylori	Ubiquitous	Human	Tourrette et al., 2024, 10.1038/s41586-024-07991-z from Falush
HEL_CA4967AA_AS	NO	NO	hpEurope	YES	0.9165	1	Entero	40.45	-3.25	Spain	Europe	Human	H. pylori	Ubiquitous	Human	Tourrette et al., 2024, 10.1038/s41586-024-07991-z from Falush
HEL_BA3544AA_AS	NO	NO	hpEurope	YES	0.9163	1	Entero	23.6345	-102.553	Mexico	North_America	Human	H. pylori	Ubiquitous	Human	Camorlinga-Ponce et al., 2021, 10.3389/fcimb.2020.539115
HEL_CA4185AA_AS	NO	NO	hpEurope	YES	0.9163	1	Entero	18.7357	-70.1627	Dominican_Republic	South_America	Human	H. pylori	Ubiquitous	Human	Tourrette et al., 2024, 10.1038/s41586-024-07991-z from Falush
HEL_CA4501AA_AS	NO	NO	hpEurope	YES	0.9163	1	Entero	39.0742	21.8243	Greece	Europe	Human	H. pylori	Ubiquitous	Human	Tourrette et al., 2024, 10.1038/s41586-024-07991-z from Falush
HEL_CA5053AA_AS	NO	NO	hpEurope	YES	0.9163	1	Entero	40.45	-3.25	Spain	Europe	Human	H. pylori	Ubiquitous	Human	Tourrette et al., 2024, 10.1038/s41586-024-07991-z from Falush
HEL_CA5045AA_AS	NO	NO	hpEurope	YES	0.9162	1	Entero	40.45	-3.25	Spain	Europe	Human	H. pylori	Ubiquitous	Human	Tourrette et al., 2024, 10.1038/s41586-024-07991-z from Falush
HEL_CA5730AA_AS	NO	NO	hpEurope	YES	0.9162	1	Entero	38.9637	35.2433	Turkey	Europe	Human	H. pylori	Ubiquitous	Human	Tourrette et al., 2024, 10.1038/s41586-024-07991-z from Falush
HEL_CA4138AA_AS	NO	NO	hpEurope	YES	0.9161	1	Entero	-14.235	-51.9253	Brazil	South_America	Human	H. pylori	Ubiquitous	Human	Tourrette et al., 2024, 10.1038/s41586-024-07991-z from Falush
HEL_CA4208AA_AS	NO	NO	hpEurope	YES	0.9161	1	Entero	4.57087	-74.2973	Colombia	South_America	Human	H. pylori	Ubiquitous	Human	Tourrette et al., 2024, 10.1038/s41586-024-07991-z from Falush
HEL_CA4577AA_AS	NO	NO	hpEurope	YES	0.9158	1	Entero	31.0461	34.8516	Israel	West_Asia	Human	H. pylori	Ubiquitous	Human	Tourrette et al., 2024, 10.1038/s41586-024-07991-z from Falush
HEL_CA5446AA_AS	NO	NO	hpEurope	YES	0.9158	1	Entero	46.8182	8.22751	Switzerland	Europe	Human	H. pylori	Ubiquitous	Human	Tourrette et al., 2024, 10.1038/s41586-024-07991-z from Falush
HEL_CA5641AA_AS	NO	NO	hpEurope	YES	0.9158	1	Entero	38.7946	-106.535	United_States	North_America	Human	H. pylori	Ubiquitous	Human	Tourrette et al., 2024, 10.1038/s41586-024-07991-z from Falush
HEL_CA5077AA_AS	NO	NO	hpEurope	YES	0.9157	1	Entero	59.51	38.28	Sweden	Europe	Human	H. pylori	Ubiquitous	Human	Tourrette et al., 2024, 10.1038/s41586-024-07991-z from Falush
HEL_AA0396AA_AS	NO	NO	hpEurope	YES	0.9156	1	Entero	36.2048	138.253	Japan	East_Asia	Human	H. pylori	Ubiquitous	Human	Satou et al., 2014, 10.1128/genomeA.00286-14
HEL_CA4213AA_AS	NO	NO	hpEurope	YES	0.9156	1	Entero	-35.6751	-71.543	Chile	South_America	Human	H. pylori	Ubiquitous	Human	Tourrette et al., 2024, 10.1038/s41586-024-07991-z from Falush
HEL_CA4346AA_AS	NO	NO	hpEurope	YES	0.9156	1	Entero	4.57087	-74.2973	Colombia	South_America	Human	H. pylori	Ubiquitous	Human	Tourrette et al., 2024, 10.1038/s41586-024-07991-z from Falush
HEL_CA4347AA_AS	NO	NO	hpEurope	YES	0.9156	1	Entero	9.74892	-83.7534	Costa_Rica	North_America	Human	H. pylori	Ubiquitous	Human	Tourrette et al., 2024, 10.1038/s41586-024-07991-z from Falush
HEL_CA4646AA_AS	NO	NO	hpEurope	YES	0.9156	1	Entero	36.2048	138.253	Japan	East_Asia	Human	H. pylori	Ubiquitous	Human	Tourrette et al., 2024, 10.1038/s41586-024-07991-z from Falush
HEL_CA4219AA_AS	NO	NO	hpEurope	YES	0.9155	1	Entero	-0.228021	15.8277	Congo	Africa	Human	H. pylori	Ubiquitous	Human	Tourrette et al., 2024, 10.1038/s41586-024-07991-z from Falush
HEL_CA4807AA_AS	NO	NO	hpEurope	YES	0.9155	1	Entero	23.6345	-102.553	Mexico	North_America	Human	H. pylori	Ubiquitous	Human	Tourrette et al., 2024, 10.1038/s41586-024-07991-z from Falush
HEL_AA0400AA_AS	NO	NO	hpEurope	YES	0.9153	1	Entero	36.2048	138.253	Japan	East_Asia	Human	H. pylori	Ubiquitous	Human	Satou et al., 2014, 10.1128/genomeA.00286-14
HEL_CA5069AA_AS	NO	NO	hpEurope	YES	0.9153	1	Entero	40.45	-3.25	Spain	Europe	Human	H. pylori	Ubiquitous	Human	Tourrette et al., 2024, 10.1038/s41586-024-07991-z from Falush
HEL_CA5621AA_AS	NO	NO	hpEurope	YES	0.9153	1	Entero	38.7946	-106.535	United_States	North_America	Human	H. pylori	Ubiquitous	Human	Tourrette et al., 2024, 10.1038/s41586-024-07991-z from Falush
HEL_CA4153AA_AS	NO	NO	hpEurope	YES	0.9152	1	Entero	23.685	90.3563	Bangladesh	South_Asia	Human	H. pylori	Ubiquitous	Human	Tourrette et al., 2024, 10.1038/s41586-024-07991-z from Falush
HEL_CA4526AA_AS	NO	NO	hpEurope	YES	0.9152	1	Entero	20.5937	78.9629	India	South_Asia	Human	H. pylori	Ubiquitous	Human	Tourrette et al., 2024, 10.1038/s41586-024-07991-z from Falush
HEL_CA4592AA_AS	NO	NO	hpEurope	YES	0.9152	1	Entero	41.8719	12.5674	Italy	Europe	Human	H. pylori	Ubiquitous	Human	Tourrette et al., 2024, 10.1038/s41586-024-07991-z from Falush
HEL_CA4360AA_AS	NO	NO	hpEurope	YES	0.9151	1	Entero	4.57087	-74.2973	Colombia	South_America	Human	H. pylori	Ubiquitous	Human	Tourrette et al., 2024, 10.1038/s41586-024-07991-z from Falush
HEL_CA4544AA_AS	NO	NO	hpEurope	YES	0.9151	1	Entero	15.2	-86.2419	Honduras	North_America	Human	H. pylori	Ubiquitous	Human	Tourrette et al., 2024, 10.1038/s41586-024-07991-z from Falush
HEL_CA4547AA_AS	NO	NO	hpEurope	YES	0.9151	1	Entero	-0.789275	113.921	Indonesia	Southeast_Asia	Human	H. pylori	Ubiquitous	Human	Tourrette et al., 2024, 10.1038/s41586-024-07991-z from Falush
HEL_CA5633AA_AS	NO	NO	hpEurope	YES	0.9151	1	Entero	38.7946	-106.535	United_States	North_America	Human	H. pylori	Ubiquitous	Human	Tourrette et al., 2024, 10.1038/s41586-024-07991-z from Falush
HEL_CA5040AA_AS	NO	NO	hpEurope	YES	0.915	1	Entero	40.45	-3.25	Spain	Europe	Human	H. pylori	Ubiquitous	Human	Tourrette et al., 2024, 10.1038/s41586-024-07991-z from Falush
HEL_CA4130AA_AS	NO	NO	hpEurope	YES	0.9149	1	Entero	-38.4161	-63.6167	Argentina	South_America	Human	H. pylori	Ubiquitous	Human	Tourrette et al., 2024, 10.1038/s41586-024-07991-z from Falush
HEL_CA4598AA_AS	NO	NO	hpEurope	YES	0.9149	1	Entero	41.8719	12.5674	Italy	Europe	Human	H. pylori	Ubiquitous	Human	Tourrette et al., 2024, 10.1038/s41586-024-07991-z from Falush
HEL_AA0399AA_AS	NO	NO	hpEurope	YES	0.9148	1	Entero	36.2048	138.253	Japan	East_Asia	Human	H. pylori	Ubiquitous	Human	Satou et al., 2014, 10.1128/genomeA.00286-14
HEL_CA4376AA_AS	NO	NO	hpEurope	YES	0.9148	1	Entero	-33.724	-71.015	Chile	South_America	Human	H. pylori	Ubiquitous	Human	Tourrette et al., 2024, 10.1038/s41586-024-07991-z from Falush
HEL_CA4880AA_AS	NO	NO	hpEurope	YES	0.9148	1	Entero	51.9194	19.1451	Poland	Europe	Human	H. pylori	Ubiquitous	Human	Tourrette et al., 2024, 10.1038/s41586-024-07991-z from Falush
HEL_CA4912AA_AS	NO	NO	hpEurope	YES	0.9148	1	Entero	39.3999	-8.22445	Portugal	Europe	Human	H. pylori	Ubiquitous	Human	Tourrette et al., 2024, 10.1038/s41586-024-07991-z from Falush
HEL_CA4470AA_AS	NO	NO	hpEurope	YES	0.9147	1	Entero	51.1657	10.4515	Germany	Europe	Human	H. pylori	Ubiquitous	Human	Tourrette et al., 2024, 10.1038/s41586-024-07991-z from Falush
HEL_CA4815AA_AS	NO	NO	hpEurope	YES	0.9147	1	Entero	23.6345	-102.553	Mexico	North_America	Human	H. pylori	Ubiquitous	Human	Tourrette et al., 2024, 10.1038/s41586-024-07991-z from Falush
HEL_CA5632AA_AS	NO	NO	hpEurope	YES	0.9146	1	Entero	38.7946	-106.535	United_States	North_America	Human	H. pylori	Ubiquitous	Human	Tourrette et al., 2024, 10.1038/s41586-024-07991-z from Falush
HEL_CA4877AA_AS	NO	NO	hpEurope	YES	0.9145	1	Entero	-9.18997	-75.0152	Peru	South_America	Human	H. pylori	Ubiquitous	Human	Tourrette et al., 2024, 10.1038/s41586-024-07991-z from Falush
HEL_CA4339AA_AS	NO	NO	hpEurope	YES	0.9144	1	Entero	9.74892	-83.7534	Costa_Rica	North_America	Human	H. pylori	Ubiquitous	Human	Tourrette et al., 2024, 10.1038/s41586-024-07991-z from Falush
HEL_CA5688AA_AS	NO	NO	hpEurope	YES	0.9144	1	Entero	38.9637	35.2433	Turkey	Europe	Human	H. pylori	Ubiquitous	Human	Tourrette et al., 2024, 10.1038/s41586-024-07991-z from Falush
HEL_CA5509AA_AS	NO	NO	hpEurope	YES	0.9144	1	Entero	38.7946	-106.535	United_States	North_America	Human	H. pylori	Ubiquitous	Human	Tourrette et al., 2024, 10.1038/s41586-024-07991-z from Falush
HEL_CA4639AA_AS	NO	NO	hpEurope	YES	0.9143	1	Entero	36.2048	138.253	Japan	East_Asia	Human	H. pylori	Ubiquitous	Human	Tourrette et al., 2024, 10.1038/s41586-024-07991-z from Falush
HEL_CA5187AA_AS	NO	NO	hpEurope	YES	0.9143	1	Entero	46.8182	8.22751	Switzerland	Europe	Human	H. pylori	Ubiquitous	Human	Tourrette et al., 2024, 10.1038/s41586-024-07991-z from Falush
HEL_CA5013AA_AS	NO	NO	hpEurope	YES	0.9142	1	Entero	40.45	-3.25	Spain	Europe	Human	H. pylori	Ubiquitous	Human	Tourrette et al., 2024, 10.1038/s41586-024-07991-z from Falush
HEL_CA4530AA_AS	NO	NO	hpEurope	YES	0.9141	1	Entero	15.2	-86.2419	Honduras	North_America	Human	H. pylori	Ubiquitous	Human	Tourrette et al., 2024, 10.1038/s41586-024-07991-z from Falush
HEL_CA4603AA_AS	NO	NO	hpEurope	YES	0.9141	1	Entero	41.8719	12.5674	Italy	Europe	Human	H. pylori	Ubiquitous	Human	Tourrette et al., 2024, 10.1038/s41586-024-07991-z from Falush
HEL_CA4119AA_AS	NO	NO	hpEurope	YES	0.914	1	Entero	-14.235	-51.9253	Brazil	South_America	Human	H. pylori	Ubiquitous	Human	Tourrette et al., 2024, 10.1038/s41586-024-07991-z from Falush
HEL_CA5008AA_AS	NO	NO	hpEurope	YES	0.914	1	Entero	40.45	-3.25	Spain	Europe	Human	H. pylori	Ubiquitous	Human	Tourrette et al., 2024, 10.1038/s41586-024-07991-z from Falush
HEL_AA0333AA_AS	NO	NO	hpEurope	YES	0.9138	1	Entero	19.3327	-99.1792	Mexico	North_America	Human	H. pylori	Ubiquitous	Human	Mucito-Varela et al., 2016, 10.1128/genomeA.01503-15
HEL_CA4562AA_AS	NO	NO	hpEurope	YES	0.9138	1	Entero	64.9631	-19.0208	Iceland	Europe	Human	H. pylori	Ubiquitous	Human	Tourrette et al., 2024, 10.1038/s41586-024-07991-z from Falush
HEL_CA4758AA_AS	NO	NO	hpEurope	YES	0.9138	1	Entero	55.1694	23.8813	Lithuania	Europe	Human	H. pylori	Ubiquitous	Human	Tourrette et al., 2024, 10.1038/s41586-024-07991-z from Falush
HEL_AA0391AA_AS	NO	NO	hpEurope	YES	0.9137	1	Entero	46.2276	2.21375	France	Europe	Human	H. pylori	Ubiquitous	Human	Thiberge et al., 2010, 10.1186/1471-2164-11-368
HEL_CA6182AA_AS	NO	NO	hpEurope	YES	0.9137	1	Entero	36.2048	138.253	Japan	East_Asia	Human	H. pylori	Ubiquitous	Human	Tourrette et al., 2024, 10.1038/s41586-024-07991-z from Falush
HEL_CA4896AA_AS	NO	NO	hpEurope	YES	0.9135	1	Entero	39.3999	-8.22445	Portugal	Europe	Human	H. pylori	Ubiquitous	Human	Tourrette et al., 2024, 10.1038/s41586-024-07991-z from Falush
HEL_CA5034AA_AS	NO	NO	hpEurope	YES	0.9134	1	Entero	40.45	-3.25	Spain	Europe	Human	H. pylori	Ubiquitous	Human	Tourrette et al., 2024, 10.1038/s41586-024-07991-z from Falush
HEL_CA5605AA_AS	NO	NO	hpEurope	YES	0.9134	1	Entero	38.7946	-106.535	United_States	North_America	Human	H. pylori	Ubiquitous	Human	Tourrette et al., 2024, 10.1038/s41586-024-07991-z from Falush
HEL_AA0381AA_AS	NO	NO	hpEurope	YES	0.9132	1	Entero	36.2048	138.253	Japan	East_Asia	Human	H. pylori	Ubiquitous	Human	DDBJ
HEL_CA4867AA_AS	NO	NO	hpEurope	YES	0.9132	1	Entero	-9.18997	-75.0152	Peru	South_America	Human	H. pylori	Ubiquitous	Human	Tourrette et al., 2024, 10.1038/s41586-024-07991-z from Falush
HEL_CA4984AA_AS	NO	NO	hpEurope	YES	0.9132	1	Entero	40.45	-3.25	Spain	Europe	Human	H. pylori	Ubiquitous	Human	Tourrette et al., 2024, 10.1038/s41586-024-07991-z from Falush
HEL_CA5711AA_AS	NO	NO	hpEurope	YES	0.9132	1	Entero	38.9637	35.2433	Turkey	Europe	Human	H. pylori	Ubiquitous	Human	Tourrette et al., 2024, 10.1038/s41586-024-07991-z from Falush
HEL_CA5698AA_AS	NO	NO	hpEurope	YES	0.9132	1	Entero	38.9637	35.2433	Turkey	Europe	Human	H. pylori	Ubiquitous	Human	Tourrette et al., 2024, 10.1038/s41586-024-07991-z from Falush
HEL_CA5710AA_AS	NO	NO	hpEurope	YES	0.9132	1	Entero	38.9637	35.2433	Turkey	Europe	Human	H. pylori	Ubiquitous	Human	Tourrette et al., 2024, 10.1038/s41586-024-07991-z from Falush
HEL_CA4211AA_AS	NO	NO	hpEurope	YES	0.9131	1	Entero	18.7357	-70.1627	Dominican_Republic	South_America	Human	H. pylori	Ubiquitous	Human	Tourrette et al., 2024, 10.1038/s41586-024-07991-z from Falush
HEL_CA4810AA_AS	NO	NO	hpEurope	YES	0.9131	1	Entero	23.6345	-102.553	Mexico	North_America	Human	H. pylori	Ubiquitous	Human	Tourrette et al., 2024, 10.1038/s41586-024-07991-z from Falush
HEL_CA4589AA_AS	NO	NO	hpEurope	YES	0.913	1	Entero	41.8719	12.5674	Italy	Europe	Human	H. pylori	Ubiquitous	Human	Tourrette et al., 2024, 10.1038/s41586-024-07991-z from Falush
HEL_CA4323AA_AS	NO	NO	hpEurope	YES	0.9128	1	Entero	9.74892	-83.7534	Costa_Rica	North_America	Human	H. pylori	Ubiquitous	Human	Tourrette et al., 2024, 10.1038/s41586-024-07991-z from Falush
HEL_CA4594AA_AS	NO	NO	hpEurope	YES	0.9126	1	Entero	41.8719	12.5674	Italy	Europe	Human	H. pylori	Ubiquitous	Human	Tourrette et al., 2024, 10.1038/s41586-024-07991-z from Falush
HEL_CA5002AA_AS	NO	NO	hpEurope	YES	0.9126	1	Entero	40.45	-3.25	Spain	Europe	Human	H. pylori	Ubiquitous	Human	Tourrette et al., 2024, 10.1038/s41586-024-07991-z from Falush
HEL_CA4384AA_AS	NO	NO	hpEurope	YES	0.9125	1	Entero	-35.6751	-71.543	Chile	South_America	Human	H. pylori	Ubiquitous	Human	Tourrette et al., 2024, 10.1038/s41586-024-07991-z from Falush
HEL_CA4349AA_AS	NO	NO	hpEurope	YES	0.9125	1	Entero	4.57087	-74.2973	Colombia	South_America	Human	H. pylori	Ubiquitous	Human	Tourrette et al., 2024, 10.1038/s41586-024-07991-z from Falush
HEL_CA4841AA_AS	NO	NO	hpEurope	YES	0.9125	1	Entero	28.3949	84.124	Nepal	South_Asia	Human	H. pylori	Ubiquitous	Human	Tourrette et al., 2024, 10.1038/s41586-024-07991-z from Falush
HEL_CA5071AA_AS	NO	NO	hpEurope	YES	0.9125	1	Entero	59.51	38.28	Sweden	Europe	Human	H. pylori	Ubiquitous	Human	Tourrette et al., 2024, 10.1038/s41586-024-07991-z from Falush
HEL_CA4412AA_AS	NO	NO	hpEurope	YES	0.9124	1	Entero	-35.6751	-71.543	Chile	South_America	Human	H. pylori	Ubiquitous	Human	Tourrette et al., 2024, 10.1038/s41586-024-07991-z from Falush
HEL_CA5703AA_AS	NO	NO	hpEurope	YES	0.9123	1	Entero	38.9637	35.2433	Turkey	Europe	Human	H. pylori	Ubiquitous	Human	Tourrette et al., 2024, 10.1038/s41586-024-07991-z from Falush
HEL_CA4869AA_AS	NO	NO	hpEurope	YES	0.9122	1	Entero	-9.18997	-75.0152	Peru	South_America	Human	H. pylori	Ubiquitous	Human	Tourrette et al., 2024, 10.1038/s41586-024-07991-z from Falush
HEL_CA5078AA_AS	NO	NO	hpEurope	YES	0.9122	1	Entero	40.45	-3.25	Spain	Europe	Human	H. pylori	Ubiquitous	Human	Tourrette et al., 2024, 10.1038/s41586-024-07991-z from Falush
HEL_CA4417AA_AS	NO	NO	hpEurope	YES	0.9121	1	Entero	-38.4161	-63.6167	Argentina	South_America	Human	H. pylori	Ubiquitous	Human	Tourrette et al., 2024, 10.1038/s41586-024-07991-z from Falush
HEL_AA0322AA_AS	NO	NO	hpEurope	YES	0.912	1	Entero	4.21048	101.976	Malaysia	Southeast_Asia	Human	H. pylori	Ubiquitous	Human	Rehvathy et al., 2013, 10.1128/genomeA.00687-13
HEL_CA5220AA_AS	NO	NO	hpEurope	YES	0.9119	1	Entero	55.1694	23.8813	Lithuania	Europe	Human	H. pylori	Ubiquitous	Human	Tourrette et al., 2024, 10.1038/s41586-024-07991-z from Falush
HEL_CA4921AA_AS	NO	NO	hpEurope	YES	0.9119	1	Entero	39.3999	-8.22445	Portugal	Europe	Human	H. pylori	Ubiquitous	Human	Tourrette et al., 2024, 10.1038/s41586-024-07991-z from Falush
HEL_CA4982AA_AS	NO	NO	hpEurope	YES	0.9119	1	Entero	40.45	-3.25	Spain	Europe	Human	H. pylori	Ubiquitous	Human	Tourrette et al., 2024, 10.1038/s41586-024-07991-z from Falush
HEL_CA4540AA_AS	NO	NO	hpEurope	YES	0.9118	1	Entero	15.2	-86.2419	Honduras	North_America	Human	H. pylori	Ubiquitous	Human	Tourrette et al., 2024, 10.1038/s41586-024-07991-z from Falush
HEL_CA5707AA_AS	NO	NO	hpEurope	YES	0.9118	1	Entero	38.7946	-106.535	United_States	North_America	Human	H. pylori	Ubiquitous	Human	Tourrette et al., 2024, 10.1038/s41586-024-07991-z from Falush
HEL_CA5179AA_AS	NO	NO	hpEurope	YES	0.9117	1	Entero	28.3949	84.124	Nepal	South_Asia	Human	H. pylori	Ubiquitous	Human	Tourrette et al., 2024, 10.1038/s41586-024-07991-z from Falush
HEL_CA4831AA_AS	NO	NO	hpEurope	YES	0.9117	1	Entero	28.3949	84.124	Nepal	South_Asia	Human	H. pylori	Ubiquitous	Human	Tourrette et al., 2024, 10.1038/s41586-024-07991-z from Falush
HEL_CA4966AA_AS	NO	NO	hpEurope	YES	0.9117	1	Entero	40.45	-3.25	Spain	Europe	Human	H. pylori	Ubiquitous	Human	Tourrette et al., 2024, 10.1038/s41586-024-07991-z from Falush
HEL_CA4960AA_AS	NO	NO	hpEurope	YES	0.9117	1	Entero	40.45	-3.25	Spain	Europe	Human	H. pylori	Ubiquitous	Human	Tourrette et al., 2024, 10.1038/s41586-024-07991-z from Falush
HEL_CA4759AA_AS	NO	NO	hpEurope	YES	0.9115	1	Entero	55.1694	23.8813	Lithuania	Europe	Human	H. pylori	Ubiquitous	Human	Tourrette et al., 2024, 10.1038/s41586-024-07991-z from Falush
HEL_CA4909AA_AS	NO	NO	hpEurope	YES	0.9115	1	Entero	39.3999	-8.22445	Portugal	Europe	Human	H. pylori	Ubiquitous	Human	Tourrette et al., 2024, 10.1038/s41586-024-07991-z from Falush
HEL_CA5645AA_AS	NO	NO	hpEurope	YES	0.9115	1	Entero	38.7946	-106.535	United_States	North_America	Human	H. pylori	Ubiquitous	Human	Tourrette et al., 2024, 10.1038/s41586-024-07991-z from Falush
HEL_CA4842AA_AS	NO	NO	hpEurope	YES	0.9114	1	Entero	-9.18997	-75.0152	Peru	South_America	Human	H. pylori	Ubiquitous	Human	Tourrette et al., 2024, 10.1038/s41586-024-07991-z from Falush
HEL_CA5058AA_AS	NO	NO	hpEurope	YES	0.9113	1	Entero	40.45	-3.25	Spain	Europe	Human	H. pylori	Ubiquitous	Human	Tourrette et al., 2024, 10.1038/s41586-024-07991-z from Falush
HEL_CA5055AA_AS	NO	NO	hpEurope	YES	0.9112	1	Entero	40.45	-3.25	Spain	Europe	Human	H. pylori	Ubiquitous	Human	Tourrette et al., 2024, 10.1038/s41586-024-07991-z from Falush
HEL_CA4152AA_AS	NO	NO	hpEurope	YES	0.9111	1	Entero	23.685	90.3563	Bangladesh	South_Asia	Human	H. pylori	Ubiquitous	Human	Tourrette et al., 2024, 10.1038/s41586-024-07991-z from Falush
HEL_CA4597AA_AS	NO	NO	hpEurope	YES	0.9111	1	Entero	41.8719	12.5674	Italy	Europe	Human	H. pylori	Ubiquitous	Human	Tourrette et al., 2024, 10.1038/s41586-024-07991-z from Falush
HEL_CA5729AA_AS	NO	NO	hpEurope	YES	0.9111	1	Entero	38.9637	35.2433	Turkey	Europe	Human	H. pylori	Ubiquitous	Human	Tourrette et al., 2024, 10.1038/s41586-024-07991-z from Falush
HEL_CA4644AA_AS	NO	NO	hpEurope	YES	0.911	1	Entero	30.5852	36.2384	Jordan	West_Asia	Human	H. pylori	Ubiquitous	Human	Tourrette et al., 2024, 10.1038/s41586-024-07991-z from Falush
HEL_CA4881AA_AS	NO	NO	hpEurope	YES	0.911	1	Entero	51.9194	19.1451	Poland	Europe	Human	H. pylori	Ubiquitous	Human	Tourrette et al., 2024, 10.1038/s41586-024-07991-z from Falush
HEL_CA4179AA_AS	NO	NO	hpEurope	YES	0.9109	1	Entero	-38.4161	-63.6167	Argentina	South_America	Human	H. pylori	Ubiquitous	Human	Tourrette et al., 2024, 10.1038/s41586-024-07991-z from Falush
HEL_CA5067AA_AS	NO	NO	hpEurope	YES	0.9109	1	Entero	59.51	38.28	Sweden	Europe	Human	H. pylori	Ubiquitous	Human	Tourrette et al., 2024, 10.1038/s41586-024-07991-z from Falush
HEL_CA0048AA_AS	NO	NO	hpEurope	YES	0.9108	1	Entero	27.5142	90.4336	Bhutan	South_Asia	Human	H. pylori	Ubiquitous	Human	Oita University
HEL_CA5679AA_AS	NO	NO	hpEurope	YES	0.9108	1	Entero	38.7946	-106.535	United_States	North_America	Human	H. pylori	Ubiquitous	Human	Tourrette et al., 2024, 10.1038/s41586-024-07991-z from Falush
HEL_CA4527AA_AS	NO	NO	hpEurope	YES	0.9107	1	Entero	15.2	-86.2419	Honduras	North_America	Human	H. pylori	Ubiquitous	Human	Tourrette et al., 2024, 10.1038/s41586-024-07991-z from Falush
HEL_CA5066AA_AS	NO	NO	hpEurope	YES	0.9107	1	Entero	59.51	38.28	Sweden	Europe	Human	H. pylori	Ubiquitous	Human	Tourrette et al., 2024, 10.1038/s41586-024-07991-z from Falush
HEL_CA4236AA_AS	NO	NO	hpEurope	YES	0.9106	1	Entero	-35.6751	-71.543	Chile	South_America	Human	H. pylori	Ubiquitous	Human	Tourrette et al., 2024, 10.1038/s41586-024-07991-z from Falush
HEL_CA4453AA_AS	NO	NO	hpEurope	YES	0.9106	1	Entero	46.2276	2.21375	France	Europe	Human	H. pylori	Ubiquitous	Human	Tourrette et al., 2024, 10.1038/s41586-024-07991-z from Falush
HEL_CA4602AA_AS	NO	NO	hpEurope	YES	0.9106	1	Entero	41.8719	12.5674	Italy	Europe	Human	H. pylori	Ubiquitous	Human	Tourrette et al., 2024, 10.1038/s41586-024-07991-z from Falush
HEL_CA5036AA_AS	NO	NO	hpEurope	YES	0.9106	1	Entero	40.45	-3.25	Spain	Europe	Human	H. pylori	Ubiquitous	Human	Tourrette et al., 2024, 10.1038/s41586-024-07991-z from Falush
HEL_CA4496AA_AS	NO	NO	hpEurope	YES	0.9104	1	Entero	39.0742	21.8243	Greece	Europe	Human	H. pylori	Ubiquitous	Human	Tourrette et al., 2024, 10.1038/s41586-024-07991-z from Falush
HEL_CA4599AA_AS	NO	NO	hpEurope	YES	0.9104	1	Entero	41.8719	12.5674	Italy	Europe	Human	H. pylori	Ubiquitous	Human	Tourrette et al., 2024, 10.1038/s41586-024-07991-z from Falush
HEL_CA4879AA_AS	NO	NO	hpEurope	YES	0.9103	1	Entero	-9.18997	-75.0152	Peru	South_America	Human	H. pylori	Ubiquitous	Human	Tourrette et al., 2024, 10.1038/s41586-024-07991-z from Falush
HEL_CA4756AA_AS	NO	NO	hpEurope	YES	0.91	1	Entero	55.1694	23.8813	Lithuania	Europe	Human	H. pylori	Ubiquitous	Human	Tourrette et al., 2024, 10.1038/s41586-024-07991-z from Falush
HEL_CA5587AA_AS	NO	NO	hpEurope	YES	0.91	1	Entero	38.7946	-106.535	United_States	North_America	Human	H. pylori	Ubiquitous	Human	Tourrette et al., 2024, 10.1038/s41586-024-07991-z from Falush
HEL_CA5064AA_AS	NO	NO	hpEurope	YES	0.9099	1	Entero	40.45	-3.25	Spain	Europe	Human	H. pylori	Ubiquitous	Human	Tourrette et al., 2024, 10.1038/s41586-024-07991-z from Falush
HEL_CA5216AA_AS	NO	NO	hpEurope	YES	0.9099	1	Entero	59.51	38.28	Sweden	Europe	Human	H. pylori	Ubiquitous	Human	Tourrette et al., 2024, 10.1038/s41586-024-07991-z from Falush
HEL_CA5639AA_AS	NO	NO	hpEurope	YES	0.9098	1	Entero	38.7946	-106.535	United_States	North_America	Human	H. pylori	Ubiquitous	Human	Tourrette et al., 2024, 10.1038/s41586-024-07991-z from Falush
HEL_CA5006AA_AS	NO	NO	hpEurope	YES	0.9097	1	Entero	40.45	-3.25	Spain	Europe	Human	H. pylori	Ubiquitous	Human	Tourrette et al., 2024, 10.1038/s41586-024-07991-z from Falush
HEL_CA4480AA_AS	NO	NO	hpEurope	YES	0.9096	1	Entero	39.0742	21.8243	Greece	Europe	Human	H. pylori	Ubiquitous	Human	Tourrette et al., 2024, 10.1038/s41586-024-07991-z from Falush
HEL_CA4103AA_AS	NO	NO	hpEurope	YES	0.9095	1	Entero	-14.235	-51.9253	Brazil	South_America	Human	H. pylori	Ubiquitous	Human	Tourrette et al., 2024, 10.1038/s41586-024-07991-z from Falush
HEL_CA4727AA_AS	NO	NO	hpEurope	YES	0.9095	1	Entero	56.8796	24.6032	Latvia	Europe	Human	H. pylori	Ubiquitous	Human	Tourrette et al., 2024, 10.1038/s41586-024-07991-z from Falush
HEL_CA5059AA_AS	NO	NO	hpEurope	YES	0.9095	1	Entero	40.45	-3.25	Spain	Europe	Human	H. pylori	Ubiquitous	Human	Tourrette et al., 2024, 10.1038/s41586-024-07991-z from Falush
HEL_CA5062AA_AS	NO	NO	hpEurope	YES	0.9093	1	Entero	40.45	-3.25	Spain	Europe	Human	H. pylori	Ubiquitous	Human	Tourrette et al., 2024, 10.1038/s41586-024-07991-z from Falush
HEL_CA5715AA_AS	NO	NO	hpEurope	YES	0.9093	1	Entero	38.7946	-106.535	United_States	North_America	Human	H. pylori	Ubiquitous	Human	Tourrette et al., 2024, 10.1038/s41586-024-07991-z from Falush
HEL_CA4314AA_AS	NO	NO	hpEurope	YES	0.909	1	Entero	28.0339	1.65963	Algeria	Africa	Human	H. pylori	Ubiquitous	Human	Tourrette et al., 2024, 10.1038/s41586-024-07991-z from Falush
HEL_CA4651AA_AS	NO	NO	hpEurope	YES	0.909	1	Entero	30.5852	36.2384	Jordan	West_Asia	Human	H. pylori	Ubiquitous	Human	Tourrette et al., 2024, 10.1038/s41586-024-07991-z from Falush
HEL_CA4554AA_AS	NO	NO	hpEurope	YES	0.9088	1	Entero	31.0461	34.8516	Israel	West_Asia	Human	H. pylori	Ubiquitous	Human	Tourrette et al., 2024, 10.1038/s41586-024-07991-z from Falush
HEL_CA5740AA_AS	NO	NO	hpEurope	YES	0.9086	1	Entero	38.7946	-106.535	United_States	North_America	Human	H. pylori	Ubiquitous	Human	Tourrette et al., 2024, 10.1038/s41586-024-07991-z from Falush
HEL_AA0389AA_AS	NO	NO	hpEurope	YES	0.9085	1	Entero	-25.2744	133.775	Australia	Oceania	Human	H. pylori	Ubiquitous	Human	Linz et al., 2014, 10.1038/ncomms5165
HEL_CA4858AA_AS	NO	NO	hpEurope	YES	0.9084	1	Entero	-9.18997	-75.0152	Peru	South_America	Human	H. pylori	Ubiquitous	Human	Tourrette et al., 2024, 10.1038/s41586-024-07991-z from Falush
HEL_CA5200AA_AS	NO	NO	hpEurope	YES	0.9084	1	Entero	46.8182	8.22751	Switzerland	Europe	Human	H. pylori	Ubiquitous	Human	Tourrette et al., 2024, 10.1038/s41586-024-07991-z from Falush
HEL_CA4970AA_AS	NO	NO	hpEurope	YES	0.9083	1	Entero	40.45	-3.25	Spain	Europe	Human	H. pylori	Ubiquitous	Human	Tourrette et al., 2024, 10.1038/s41586-024-07991-z from Falush
HEL_BA3539AA_AS	NO	NO	hpEurope	YES	0.9082	1	Entero	23.6345	-102.553	Mexico	North_America	Human	H. pylori	Ubiquitous	Human	Camorlinga-Ponce et al., 2021, 10.3389/fcimb.2020.539115
HEL_CA4465AA_AS	NO	NO	hpEurope	YES	0.9082	1	Entero	39.0742	21.8243	Greece	Europe	Human	H. pylori	Ubiquitous	Human	Tourrette et al., 2024, 10.1038/s41586-024-07991-z from Falush
HEL_CA4918AA_AS	NO	NO	hpEurope	YES	0.908	1	Entero	39.3999	-8.22445	Portugal	Europe	Human	H. pylori	Ubiquitous	Human	Tourrette et al., 2024, 10.1038/s41586-024-07991-z from Falush
HEL_CA4913AA_AS	NO	NO	hpEurope	YES	0.908	1	Entero	39.3999	-8.22445	Portugal	Europe	Human	H. pylori	Ubiquitous	Human	Tourrette et al., 2024, 10.1038/s41586-024-07991-z from Falush
HEL_CA4742AA_AS	NO	NO	hpEurope	YES	0.9079	1	Entero	56.8796	24.6032	Latvia	Europe	Human	H. pylori	Ubiquitous	Human	Tourrette et al., 2024, 10.1038/s41586-024-07991-z from Falush
HEL_CA5615AA_AS	NO	NO	hpEurope	YES	0.9079	1	Entero	38.7946	-106.535	United_States	North_America	Human	H. pylori	Ubiquitous	Human	Tourrette et al., 2024, 10.1038/s41586-024-07991-z from Falush
HEL_BA3547AA_AS	NO	NO	hpEurope	YES	0.9078	1	Entero	23.6345	-102.553	Mexico	North_America	Human	H. pylori	Ubiquitous	Human	Camorlinga-Ponce et al., 2021, 10.3389/fcimb.2020.539115
HEL_CA4985AA_AS	NO	NO	hpEurope	YES	0.9078	1	Entero	40.45	-3.25	Spain	Europe	Human	H. pylori	Ubiquitous	Human	Tourrette et al., 2024, 10.1038/s41586-024-07991-z from Falush
HEL_CA4988AA_AS	NO	NO	hpEurope	YES	0.9078	1	Entero	40.45	-3.25	Spain	Europe	Human	H. pylori	Ubiquitous	Human	Tourrette et al., 2024, 10.1038/s41586-024-07991-z from Falush
HEL_CA5792AA_AS	NO	NO	hpEurope	YES	0.9077	1	Entero	38.7946	-106.535	United_States	North_America	Human	H. pylori	Ubiquitous	Human	Tourrette et al., 2024, 10.1038/s41586-024-07991-z from Falush
HEL_CA5043AA_AS	NO	NO	hpEurope	YES	0.9076	1	Entero	40.45	-3.25	Spain	Europe	Human	H. pylori	Ubiquitous	Human	Tourrette et al., 2024, 10.1038/s41586-024-07991-z from Falush
HEL_CA4919AA_AS	NO	NO	hpEurope	YES	0.9075	1	Entero	39.3999	-8.22445	Portugal	Europe	Human	H. pylori	Ubiquitous	Human	Tourrette et al., 2024, 10.1038/s41586-024-07991-z from Falush
HEL_CA5723AA_AS	NO	NO	hpEurope	YES	0.9074	1	Entero	38.7946	-106.535	United_States	North_America	Human	H. pylori	Ubiquitous	Human	Tourrette et al., 2024, 10.1038/s41586-024-07991-z from Falush
HEL_CA4990AA_AS	NO	NO	hpEurope	YES	0.9073	1	Entero	40.45	-3.25	Spain	Europe	Human	H. pylori	Ubiquitous	Human	Tourrette et al., 2024, 10.1038/s41586-024-07991-z from Falush
HEL_CA5046AA_AS	NO	NO	hpEurope	YES	0.9072	1	Entero	40.45	-3.25	Spain	Europe	Human	H. pylori	Ubiquitous	Human	Tourrette et al., 2024, 10.1038/s41586-024-07991-z from Falush
HEL_CA4957AA_AS	NO	NO	hpEurope	YES	0.9072	1	Entero	40.45	-3.25	Spain	Europe	Human	H. pylori	Ubiquitous	Human	Tourrette et al., 2024, 10.1038/s41586-024-07991-z from Falush
HEL_CA4458AA_AS	NO	NO	hpEurope	YES	0.907	1	Entero	46.2276	2.21375	France	Europe	Human	H. pylori	Ubiquitous	Human	Tourrette et al., 2024, 10.1038/s41586-024-07991-z from Falush
HEL_CA4808AA_AS	NO	NO	hpEurope	YES	0.9069	1	Entero	23.6345	-102.553	Mexico	North_America	Human	H. pylori	Ubiquitous	Human	Tourrette et al., 2024, 10.1038/s41586-024-07991-z from Falush
HEL_CA5037AA_AS	NO	NO	hpEurope	YES	0.9069	1	Entero	40.45	-3.25	Spain	Europe	Human	H. pylori	Ubiquitous	Human	Tourrette et al., 2024, 10.1038/s41586-024-07991-z from Falush
HEL_CA4585AA_AS	NO	NO	hpEurope	YES	0.9068	1	Entero	64.9631	-19.0208	Iceland	Europe	Human	H. pylori	Ubiquitous	Human	Tourrette et al., 2024, 10.1038/s41586-024-07991-z from Falush
HEL_CA4721AA_AS	NO	NO	hpEurope	YES	0.9067	1	Entero	56.8796	24.6032	Latvia	Europe	Human	H. pylori	Ubiquitous	Human	Tourrette et al., 2024, 10.1038/s41586-024-07991-z from Falush
HEL_CA4521AA_AS	NO	NO	hpEurope	YES	0.9066	1	Entero	64.9631	-19.0208	Iceland	Europe	Human	H. pylori	Ubiquitous	Human	Tourrette et al., 2024, 10.1038/s41586-024-07991-z from Falush
HEL_CA4498AA_AS	NO	NO	hpEurope	YES	0.9065	1	Entero	64.9631	-19.0208	Iceland	Europe	Human	H. pylori	Ubiquitous	Human	Tourrette et al., 2024, 10.1038/s41586-024-07991-z from Falush
HEL_CA4558AA_AS	NO	NO	hpEurope	YES	0.9064	1	Entero	20.5937	78.9629	India	South_Asia	Human	H. pylori	Ubiquitous	Human	Tourrette et al., 2024, 10.1038/s41586-024-07991-z from Falush
HEL_CA4793AA_AS	NO	NO	hpEurope	YES	0.9064	1	Entero	23.6345	-102.553	Mexico	North_America	Human	H. pylori	Ubiquitous	Human	Tourrette et al., 2024, 10.1038/s41586-024-07991-z from Falush
HEL_CA5028AA_AS	NO	NO	hpEurope	YES	0.9064	1	Entero	40.45	-3.25	Spain	Europe	Human	H. pylori	Ubiquitous	Human	Tourrette et al., 2024, 10.1038/s41586-024-07991-z from Falush
HEL_CA4318AA_AS	NO	NO	hpEurope	YES	0.9061	1	Entero	4.57087	-74.2973	Colombia	South_America	Human	H. pylori	Ubiquitous	Human	Tourrette et al., 2024, 10.1038/s41586-024-07991-z from Falush
HEL_CA5072AA_AS	NO	NO	hpEurope	YES	0.9061	1	Entero	59.51	38.28	Sweden	Europe	Human	H. pylori	Ubiquitous	Human	Tourrette et al., 2024, 10.1038/s41586-024-07991-z from Falush
HEL_CA4552AA_AS	NO	NO	hpEurope	YES	0.906	1	Entero	31.0461	34.8516	Israel	West_Asia	Human	H. pylori	Ubiquitous	Human	Tourrette et al., 2024, 10.1038/s41586-024-07991-z from Falush
HEL_CA5011AA_AS	NO	NO	hpEurope	YES	0.9059	1	Entero	40.45	-3.25	Spain	Europe	Human	H. pylori	Ubiquitous	Human	Tourrette et al., 2024, 10.1038/s41586-024-07991-z from Falush
HEL_CA5629AA_AS	NO	NO	hpEurope	YES	0.9057	1	Entero	38.7946	-106.535	United_States	North_America	Human	H. pylori	Ubiquitous	Human	Tourrette et al., 2024, 10.1038/s41586-024-07991-z from Falush
HEL_CA4586AA_AS	NO	NO	hpEurope	YES	0.9055	1	Entero	31.0461	34.8516	Israel	West_Asia	Human	H. pylori	Ubiquitous	Human	Tourrette et al., 2024, 10.1038/s41586-024-07991-z from Falush
HEL_CA4998AA_AS	NO	NO	hpEurope	YES	0.9055	1	Entero	40.45	-3.25	Spain	Europe	Human	H. pylori	Ubiquitous	Human	Tourrette et al., 2024, 10.1038/s41586-024-07991-z from Falush
HEL_BA3590AA_AS	NO	NO	hpEurope	YES	0.9054	1	Entero	51.1657	10.4515	Germany	Europe	Human	H. pylori	Ubiquitous	Human	Ailloud et al., 2019, 10.1038/s41467-019-10050-1
HEL_CA4284AA_AS	NO	NO	hpEurope	YES	0.9053	1	Entero	28.0339	1.65963	Algeria	Africa	Human	H. pylori	Ubiquitous	Human	Tourrette et al., 2024, 10.1038/s41586-024-07991-z from Falush
HEL_CA5047AA_AS	NO	NO	hpEurope	YES	0.9052	1	Entero	40.45	-3.25	Spain	Europe	Human	H. pylori	Ubiquitous	Human	Tourrette et al., 2024, 10.1038/s41586-024-07991-z from Falush
HEL_CA5445AA_AS	NO	NO	hpEurope	YES	0.9052	1	Entero	46.8182	8.22751	Switzerland	Europe	Human	H. pylori	Ubiquitous	Human	Tourrette et al., 2024, 10.1038/s41586-024-07991-z from Falush
HEL_CA4248AA_AS	NO	NO	hpEurope	YES	0.9051	1	Entero	-35.6751	-71.543	Chile	South_America	Human	H. pylori	Ubiquitous	Human	Tourrette et al., 2024, 10.1038/s41586-024-07991-z from Falush
HEL_CA4861AA_AS	NO	NO	hpEurope	YES	0.905	1	Entero	-9.18997	-75.0152	Peru	South_America	Human	H. pylori	Ubiquitous	Human	Tourrette et al., 2024, 10.1038/s41586-024-07991-z from Falush
HEL_CA5051AA_AS	NO	NO	hpEurope	YES	0.905	1	Entero	40.45	-3.25	Spain	Europe	Human	H. pylori	Ubiquitous	Human	Tourrette et al., 2024, 10.1038/s41586-024-07991-z from Falush
HEL_CA5061AA_AS	NO	NO	hpEurope	YES	0.905	1	Entero	40.45	-3.25	Spain	Europe	Human	H. pylori	Ubiquitous	Human	Tourrette et al., 2024, 10.1038/s41586-024-07991-z from Falush
HEL_CA4246AA_AS	NO	NO	hpEurope	YES	0.9049	1	Entero	-35.6751	-71.543	Chile	South_America	Human	H. pylori	Ubiquitous	Human	Tourrette et al., 2024, 10.1038/s41586-024-07991-z from Falush
HEL_CA4906AA_AS	NO	NO	hpEurope	YES	0.9047	1	Entero	39.3999	-8.22445	Portugal	Europe	Human	H. pylori	Ubiquitous	Human	Tourrette et al., 2024, 10.1038/s41586-024-07991-z from Falush
HEL_CA4126AA_AS	NO	NO	hpEurope	YES	0.9046	1	Entero	-14.235	-51.9253	Brazil	South_America	Human	H. pylori	Ubiquitous	Human	Tourrette et al., 2024, 10.1038/s41586-024-07991-z from Falush
HEL_CA4588AA_AS	NO	NO	hpEurope	YES	0.9046	1	Entero	41.8719	12.5674	Italy	Europe	Human	H. pylori	Ubiquitous	Human	Tourrette et al., 2024, 10.1038/s41586-024-07991-z from Falush
HEL_CA5063AA_AS	NO	NO	hpEurope	YES	0.9046	1	Entero	40.45	-3.25	Spain	Europe	Human	H. pylori	Ubiquitous	Human	Tourrette et al., 2024, 10.1038/s41586-024-07991-z from Falush
HEL_CA4449AA_AS	NO	NO	hpEurope	YES	0.9045	1	Entero	46.2276	2.21375	France	Europe	Human	H. pylori	Ubiquitous	Human	Tourrette et al., 2024, 10.1038/s41586-024-07991-z from Falush
HEL_CA4149AA_AS	NO	NO	hpEurope	YES	0.9044	1	Entero	18.7357	-70.1627	Dominican_Republic	South_America	Human	H. pylori	Ubiquitous	Human	Tourrette et al., 2024, 10.1038/s41586-024-07991-z from Falush
HEL_CA5159AA_AS	NO	NO	hpEurope	YES	0.9044	1	Entero	51.9194	19.1451	Poland	Europe	Human	H. pylori	Ubiquitous	Human	Tourrette et al., 2024, 10.1038/s41586-024-07991-z from Falush
HEL_CA5041AA_AS	NO	NO	hpEurope	YES	0.9042	1	Entero	40.45	-3.25	Spain	Europe	Human	H. pylori	Ubiquitous	Human	Tourrette et al., 2024, 10.1038/s41586-024-07991-z from Falush
HEL_CA4492AA_AS	NO	NO	hpEurope	YES	0.904	1	Entero	39.0742	21.8243	Greece	Europe	Human	H. pylori	Ubiquitous	Human	Tourrette et al., 2024, 10.1038/s41586-024-07991-z from Falush
HEL_CA4857AA_AS	NO	NO	hpEurope	YES	0.904	1	Entero	-9.18997	-75.0152	Peru	South_America	Human	H. pylori	Ubiquitous	Human	Tourrette et al., 2024, 10.1038/s41586-024-07991-z from Falush
HEL_CA4261AA_AS	NO	NO	hpEurope	YES	0.9038	1	Entero	-35.6751	-71.543	Chile	South_America	Human	H. pylori	Ubiquitous	Human	Tourrette et al., 2024, 10.1038/s41586-024-07991-z from Falush
HEL_CA5197AA_AS	NO	NO	hpEurope	YES	0.9038	1	Entero	46.8182	8.22751	Switzerland	Europe	Human	H. pylori	Ubiquitous	Human	Tourrette et al., 2024, 10.1038/s41586-024-07991-z from Falush
HEL_CA4537AA_AS	NO	NO	hpEurope	YES	0.9037	1	Entero	15.2	-86.2419	Honduras	North_America	Human	H. pylori	Ubiquitous	Human	Tourrette et al., 2024, 10.1038/s41586-024-07991-z from Falush
HEL_CA4926AA_AS	NO	NO	hpEurope	YES	0.9036	1	Entero	18.2208	-66.5901	Puerto_Rico	North_America	Human	H. pylori	Ubiquitous	Human	Tourrette et al., 2024, 10.1038/s41586-024-07991-z from Falush
HEL_CA4100AA_AS	NO	NO	hpEurope	YES	0.9035	1	Entero	-14.235	-51.9253	Brazil	South_America	Human	H. pylori	Ubiquitous	Human	Tourrette et al., 2024, 10.1038/s41586-024-07991-z from Falush
HEL_CA4524AA_AS	NO	NO	hpEurope	YES	0.9034	1	Entero	64.9631	-19.0208	Iceland	Europe	Human	H. pylori	Ubiquitous	Human	Tourrette et al., 2024, 10.1038/s41586-024-07991-z from Falush
HEL_CA5733AA_AS	NO	NO	hpEurope	YES	0.9034	1	Entero	38.9637	35.2433	Turkey	Europe	Human	H. pylori	Ubiquitous	Human	Tourrette et al., 2024, 10.1038/s41586-024-07991-z from Falush
HEL_CA4898AA_AS	NO	NO	hpEurope	YES	0.9032	1	Entero	39.3999	-8.22445	Portugal	Europe	Human	H. pylori	Ubiquitous	Human	Tourrette et al., 2024, 10.1038/s41586-024-07991-z from Falush
HEL_CA5033AA_AS	NO	NO	hpEurope	YES	0.9031	1	Entero	40.45	-3.25	Spain	Europe	Human	H. pylori	Ubiquitous	Human	Tourrette et al., 2024, 10.1038/s41586-024-07991-z from Falush
HEL_CA4395AA_AS	NO	NO	hpEurope	YES	0.9029	1	Entero	-35.6751	-71.543	Chile	South_America	Human	H. pylori	Ubiquitous	Human	Tourrette et al., 2024, 10.1038/s41586-024-07991-z from Falush
HEL_CA4238AA_AS	NO	NO	hpEurope	YES	0.9029	1	Entero	-35.6751	-71.543	Chile	South_America	Human	H. pylori	Ubiquitous	Human	Tourrette et al., 2024, 10.1038/s41586-024-07991-z from Falush
HEL_CA4895AA_AS	NO	NO	hpEurope	YES	0.9029	1	Entero	51.9194	19.1451	Poland	Europe	Human	H. pylori	Ubiquitous	Human	Tourrette et al., 2024, 10.1038/s41586-024-07991-z from Falush
HEL_CA5048AA_AS	NO	NO	hpEurope	YES	0.9029	1	Entero	40.45	-3.25	Spain	Europe	Human	H. pylori	Ubiquitous	Human	Tourrette et al., 2024, 10.1038/s41586-024-07991-z from Falush
HEL_CA5021AA_AS	NO	NO	hpEurope	YES	0.9029	1	Entero	40.45	-3.25	Spain	Europe	Human	H. pylori	Ubiquitous	Human	Tourrette et al., 2024, 10.1038/s41586-024-07991-z from Falush
HEL_BA3569AA_AS	NO	NO	hpEurope	YES	0.9028	1	Entero	51.1657	10.4515	Germany	Europe	Human	H. pylori	Ubiquitous	Human	Ailloud et al., 2019, 10.1038/s41467-019-10050-1
HEL_CA4163AA_AS	NO	NO	hpEurope	YES	0.9027	1	Entero	-14.235	-51.9253	Brazil	South_America	Human	H. pylori	Ubiquitous	Human	Tourrette et al., 2024, 10.1038/s41586-024-07991-z from Falush
HEL_CA5726AA_AS	NO	NO	hpEurope	YES	0.9027	1	Entero	38.9637	35.2433	Turkey	Europe	Human	H. pylori	Ubiquitous	Human	Tourrette et al., 2024, 10.1038/s41586-024-07991-z from Falush
HEL_CA4583AA_AS	NO	NO	hpEurope	YES	0.9025	1	Entero	64.9631	-19.0208	Iceland	Europe	Human	H. pylori	Ubiquitous	Human	Tourrette et al., 2024, 10.1038/s41586-024-07991-z from Falush
HEL_CA5025AA_AS	NO	NO	hpEurope	YES	0.9024	1	Entero	40.45	-3.25	Spain	Europe	Human	H. pylori	Ubiquitous	Human	Tourrette et al., 2024, 10.1038/s41586-024-07991-z from Falush
HEL_CA4203AA_AS	NO	NO	hpEurope	YES	0.9021	1	Entero	18.7357	-70.1627	Dominican_Republic	South_America	Human	H. pylori	Ubiquitous	Human	Tourrette et al., 2024, 10.1038/s41586-024-07991-z from Falush
HEL_CA4507AA_AS	NO	NO	hpEurope	YES	0.9021	1	Entero	32.4279	53.688	Iran	West_Asia	Human	H. pylori	Ubiquitous	Human	Tourrette et al., 2024, 10.1038/s41586-024-07991-z from Falush
HEL_CA4997AA_AS	NO	NO	hpEurope	YES	0.9017	1	Entero	40.45	-3.25	Spain	Europe	Human	H. pylori	Ubiquitous	Human	Tourrette et al., 2024, 10.1038/s41586-024-07991-z from Falush
HEL_CA4488AA_AS	NO	NO	hpEurope	YES	0.9013	1	Entero	38	21	Greece	Europe	Human	H. pylori	Ubiquitous	Human	Tourrette et al., 2024, 10.1038/s41586-024-07991-z from Falush
HEL_CA5115AA_AS	NO	NO	hpEurope	YES	0.9011	1	Entero	51.9194	19.1451	Poland	Europe	Human	H. pylori	Ubiquitous	Human	Tourrette et al., 2024, 10.1038/s41586-024-07991-z from Falush
HEL_CA5176AA_AS	NO	NO	hpEurope	YES	0.9011	1	Entero	59.51	38.28	Sweden	Europe	Human	H. pylori	Ubiquitous	Human	Tourrette et al., 2024, 10.1038/s41586-024-07991-z from Falush
HEL_CA5060AA_AS	NO	NO	hpEurope	YES	0.901	1	Entero	40.45	-3.25	Spain	Europe	Human	H. pylori	Ubiquitous	Human	Tourrette et al., 2024, 10.1038/s41586-024-07991-z from Falush
HEL_CA4968AA_AS	NO	NO	hpEurope	YES	0.901	1	Entero	40.45	-3.25	Spain	Europe	Human	H. pylori	Ubiquitous	Human	Tourrette et al., 2024, 10.1038/s41586-024-07991-z from Falush
HEL_CA4487AA_AS	NO	NO	hpEurope	YES	0.9009	1	Entero	39.0742	21.8243	Greece	Europe	Human	H. pylori	Ubiquitous	Human	Tourrette et al., 2024, 10.1038/s41586-024-07991-z from Falush
HEL_CA4475AA_AS	NO	NO	hpEurope	YES	0.9008	1	Entero	51.1657	10.4515	Germany	Europe	Human	H. pylori	Ubiquitous	Human	Tourrette et al., 2024, 10.1038/s41586-024-07991-z from Falush
HEL_CA4247AA_AS	NO	NO	hpEurope	YES	0.9007	1	Entero	4.57087	-74.2973	Colombia	South_America	Human	H. pylori	Ubiquitous	Human	Tourrette et al., 2024, 10.1038/s41586-024-07991-z from Falush
HEL_CA4908AA_AS	NO	NO	hpEurope	YES	0.9007	1	Entero	39.3999	-8.22445	Portugal	Europe	Human	H. pylori	Ubiquitous	Human	Tourrette et al., 2024, 10.1038/s41586-024-07991-z from Falush
HEL_CA4911AA_AS	NO	NO	hpEurope	YES	0.9007	1	Entero	39.3999	-8.22445	Portugal	Europe	Human	H. pylori	Ubiquitous	Human	Tourrette et al., 2024, 10.1038/s41586-024-07991-z from Falush
HEL_CA4254AA_AS	NO	NO	hpEurope	YES	0.9006	1	Entero	-35.6751	-71.543	Chile	South_America	Human	H. pylori	Ubiquitous	Human	Tourrette et al., 2024, 10.1038/s41586-024-07991-z from Falush
HEL_CA4797AA_AS	NO	NO	hpEurope	YES	0.9006	1	Entero	23.6345	-102.553	Mexico	North_America	Human	H. pylori	Ubiquitous	Human	Tourrette et al., 2024, 10.1038/s41586-024-07991-z from Falush
HEL_BA3531AA_AS	NO	NO	hpEurope	YES	0.9005	1	Entero	5	-72	Colombia	South_America	Human	H. pylori	Ubiquitous	Human	Group of Cytogenetics, Phylogeny and Population Evolution, University of Tolima
HEL_CA4894AA_AS	NO	NO	hpEurope	YES	0.9005	1	Entero	51.9194	19.1451	Poland	Europe	Human	H. pylori	Ubiquitous	Human	Tourrette et al., 2024, 10.1038/s41586-024-07991-z from Falush
HEL_CA5074AA_AS	NO	NO	hpEurope	YES	0.9005	1	Entero	59.51	38.28	Sweden	Europe	Human	H. pylori	Ubiquitous	Human	Tourrette et al., 2024, 10.1038/s41586-024-07991-z from Falush
HEL_CA5430AA_AS	NO	NO	hpEurope	YES	0.9005	1	Entero	46.8182	8.22751	Switzerland	Europe	Human	H. pylori	Ubiquitous	Human	Tourrette et al., 2024, 10.1038/s41586-024-07991-z from Falush
HEL_CA4450AA_AS	NO	NO	hpEurope	YES	0.9003	1	Entero	46.2276	2.21375	France	Europe	Human	H. pylori	Ubiquitous	Human	Tourrette et al., 2024, 10.1038/s41586-024-07991-z from Falush
HEL_CA4139AA_AS	NO	NO	hpEurope	YES	0.9001	1	Entero	42.7339	25.4858	Bulgaria	Europe	Human	H. pylori	Ubiquitous	Human	Tourrette et al., 2024, 10.1038/s41586-024-07991-z from Falush
HEL_CA4933AA_AS	NO	NO	hpEurope	YES	0.9001	1	Entero	18.2208	-66.5901	Puerto_Rico	North_America	Human	H. pylori	Ubiquitous	Human	Tourrette et al., 2024, 10.1038/s41586-024-07991-z from Falush
HEL_CA4197AA_AS	NO	NO	hpEurope	YES	0.9	1	Entero	4.57087	-74.2973	Colombia	South_America	Human	H. pylori	Ubiquitous	Human	Tourrette et al., 2024, 10.1038/s41586-024-07991-z from Falush
HEL_CA4210AA_AS	NO	NO	hpEurope	YES	0.9	1	Entero	9.74892	-83.7534	Costa_Rica	North_America	Human	H. pylori	Ubiquitous	Human	Tourrette et al., 2024, 10.1038/s41586-024-07991-z from Falush
HEL_CA4476AA_AS	NO	NO	hpEurope	YES	0.9	1	Entero	46.2276	2.21375	France	Europe	Human	H. pylori	Ubiquitous	Human	Tourrette et al., 2024, 10.1038/s41586-024-07991-z from Falush
HEL_CA4220AA_AS	NO	NO	hpEurope	YES	0.9	1	Entero	46.2276	2.21375	France	Europe	Human	H. pylori	Ubiquitous	Human	Tourrette et al., 2024, 10.1038/s41586-024-07991-z from Falush
HEL_CA4620AA_AS	NO	NO	hpEurope	YES	0.9	1	Entero	41.8719	12.5674	Italy	Europe	Human	H. pylori	Ubiquitous	Human	Tourrette et al., 2024, 10.1038/s41586-024-07991-z from Falush
HEL_CA4874AA_AS	NO	NO	hpEurope	YES	0.9	1	Entero	51.9194	19.1451	Poland	Europe	Human	H. pylori	Ubiquitous	Human	Tourrette et al., 2024, 10.1038/s41586-024-07991-z from Falush
HEL_CA4936AA_AS	NO	NO	hpEurope	YES	0.9	1	Entero	18.2208	-66.5901	Puerto_Rico	North_America	Human	H. pylori	Ubiquitous	Human	Tourrette et al., 2024, 10.1038/s41586-024-07991-z from Falush
HEL_CA4965AA_AS	NO	NO	hpEurope	YES	0.9	1	Entero	40.45	-3.25	Spain	Europe	Human	H. pylori	Ubiquitous	Human	Tourrette et al., 2024, 10.1038/s41586-024-07991-z from Falush
HEL_CA5083AA_AS	NO	NO	hpEurope	YES	0.9	1	Entero	59.51	38.28	Sweden	Europe	Human	H. pylori	Ubiquitous	Human	Tourrette et al., 2024, 10.1038/s41586-024-07991-z from Falush
HEL_CA5697AA_AS	NO	NO	hpEurope	YES	0.9	1	Entero	38.7946	-106.535	United_States	North_America	Human	H. pylori	Ubiquitous	Human	Tourrette et al., 2024, 10.1038/s41586-024-07991-z from Falush
HEL_CA5014AA_AS	NO	NO	hpEurope	YES	0.8998	1	Entero	40.45	-3.25	Spain	Europe	Human	H. pylori	Ubiquitous	Human	Tourrette et al., 2024, 10.1038/s41586-024-07991-z from Falush
HEL_CA4517AA_AS	NO	NO	hpEurope	YES	0.8996	1	Entero	64.9631	-19.0208	Iceland	Europe	Human	H. pylori	Ubiquitous	Human	Tourrette et al., 2024, 10.1038/s41586-024-07991-z from Falush
HEL_CA4917AA_AS	NO	NO	hpEurope	YES	0.8996	1	Entero	39.3999	-8.22445	Portugal	Europe	Human	H. pylori	Ubiquitous	Human	Tourrette et al., 2024, 10.1038/s41586-024-07991-z from Falush
HEL_CA4648AA_AS	NO	NO	hpEurope	YES	0.8995	1	Entero	41.2044	74.7661	Kyrgyzstan	Central_Asia	Human	H. pylori	Ubiquitous	Human	Tourrette et al., 2024, 10.1038/s41586-024-07991-z from Falush
HEL_CA4948AA_AS	NO	NO	hpEurope	YES	0.8995	1	Entero	49.26	136.32	Russia	North_Asia	Human	H. pylori	Ubiquitous	Human	Tourrette et al., 2024, 10.1038/s41586-024-07991-z from Falush
HEL_CA4102AA_AS	NO	NO	hpEurope	YES	0.8994	1	Entero	42.7339	25.4858	Bulgaria	Europe	Human	H. pylori	Ubiquitous	Human	Tourrette et al., 2024, 10.1038/s41586-024-07991-z from Falush
HEL_CA5038AA_AS	NO	NO	hpEurope	YES	0.8992	1	Entero	40.45	-3.25	Spain	Europe	Human	H. pylori	Ubiquitous	Human	Tourrette et al., 2024, 10.1038/s41586-024-07991-z from Falush
HEL_BA3530AA_AS	NO	NO	hpEurope	YES	0.8991	1	Entero	5	-72	Colombia	South_America	Human	H. pylori	Ubiquitous	Human	Group of Cytogenetics, Phylogeny and Population Evolution, University of Tolima
HEL_CA4910AA_AS	NO	NO	hpEurope	YES	0.8991	1	Entero	39.3999	-8.22445	Portugal	Europe	Human	H. pylori	Ubiquitous	Human	Tourrette et al., 2024, 10.1038/s41586-024-07991-z from Falush
HEL_CA4529AA_AS	NO	NO	hpEurope	YES	0.899	1	Entero	20.5937	78.9629	India	South_Asia	Human	H. pylori	Ubiquitous	Human	Tourrette et al., 2024, 10.1038/s41586-024-07991-z from Falush
HEL_CA5070AA_AS	NO	NO	hpEurope	YES	0.8989	1	Entero	40.45	-3.25	Spain	Europe	Human	H. pylori	Ubiquitous	Human	Tourrette et al., 2024, 10.1038/s41586-024-07991-z from Falush
HEL_CA4989AA_AS	NO	NO	hpEurope	YES	0.8989	1	Entero	40.45	-3.25	Spain	Europe	Human	H. pylori	Ubiquitous	Human	Tourrette et al., 2024, 10.1038/s41586-024-07991-z from Falush
HEL_CA4892AA_AS	NO	NO	hpEurope	YES	0.8986	1	Entero	52	18	Poland	Europe	Human	H. pylori	Ubiquitous	Human	Tourrette et al., 2024, 10.1038/s41586-024-07991-z from Falush
HEL_CA4885AA_AS	NO	NO	hpEurope	YES	0.8986	1	Entero	51.9194	19.1451	Poland	Europe	Human	H. pylori	Ubiquitous	Human	Tourrette et al., 2024, 10.1038/s41586-024-07991-z from Falush
HEL_CA4580AA_AS	NO	NO	hpEurope	YES	0.8984	1	Entero	31.0461	34.8516	Israel	West_Asia	Human	H. pylori	Ubiquitous	Human	Tourrette et al., 2024, 10.1038/s41586-024-07991-z from Falush
HEL_CA4893AA_AS	NO	NO	hpEurope	YES	0.8984	1	Entero	51.9194	19.1451	Poland	Europe	Human	H. pylori	Ubiquitous	Human	Tourrette et al., 2024, 10.1038/s41586-024-07991-z from Falush
HEL_CA4884AA_AS	NO	NO	hpEurope	YES	0.8983	1	Entero	51.9194	19.1451	Poland	Europe	Human	H. pylori	Ubiquitous	Human	Tourrette et al., 2024, 10.1038/s41586-024-07991-z from Falush
HEL_CA4986AA_AS	NO	NO	hpEurope	YES	0.8982	1	Entero	40.45	-3.25	Spain	Europe	Human	H. pylori	Ubiquitous	Human	Tourrette et al., 2024, 10.1038/s41586-024-07991-z from Falush
HEL_CA4803AA_AS	NO	NO	hpEurope	YES	0.8981	1	Entero	23.6345	-102.553	Mexico	North_America	Human	H. pylori	Ubiquitous	Human	Tourrette et al., 2024, 10.1038/s41586-024-07991-z from Falush
HEL_CA4311AA_AS	NO	NO	hpEurope	YES	0.898	1	Entero	28.0339	1.65963	Algeria	Africa	Human	H. pylori	Ubiquitous	Human	Tourrette et al., 2024, 10.1038/s41586-024-07991-z from Falush
HEL_CA4111AA_AS	NO	NO	hpEurope	YES	0.898	1	Entero	42.7339	25.4858	Bulgaria	Europe	Human	H. pylori	Ubiquitous	Human	Tourrette et al., 2024, 10.1038/s41586-024-07991-z from Falush
HEL_CA4543AA_AS	NO	NO	hpEurope	YES	0.898	1	Entero	39.0742	21.8243	Greece	Europe	Human	H. pylori	Ubiquitous	Human	Tourrette et al., 2024, 10.1038/s41586-024-07991-z from Falush
HEL_CA5219AA_AS	NO	NO	hpEurope	YES	0.898	1	Entero	40.45	-3.25	Spain	Europe	Human	H. pylori	Ubiquitous	Human	Tourrette et al., 2024, 10.1038/s41586-024-07991-z from Falush
HEL_CA4455AA_AS	NO	NO	hpEurope	YES	0.8978	1	Entero	46.2276	2.21375	France	Europe	Human	H. pylori	Ubiquitous	Human	Tourrette et al., 2024, 10.1038/s41586-024-07991-z from Falush
HEL_CA4463AA_AS	NO	NO	hpEurope	YES	0.8977	1	Entero	39.0742	21.8243	Greece	Europe	Human	H. pylori	Ubiquitous	Human	Tourrette et al., 2024, 10.1038/s41586-024-07991-z from Falush
HEL_CA4383AA_AS	NO	NO	hpEurope	YES	0.8976	1	Entero	-35.6751	-71.543	Chile	South_America	Human	H. pylori	Ubiquitous	Human	Tourrette et al., 2024, 10.1038/s41586-024-07991-z from Falush
HEL_CA4471AA_AS	NO	NO	hpEurope	YES	0.8976	1	Entero	51.1657	10.4515	Germany	Europe	Human	H. pylori	Ubiquitous	Human	Tourrette et al., 2024, 10.1038/s41586-024-07991-z from Falush
HEL_CA4574AA_AS	NO	NO	hpEurope	YES	0.8976	1	Entero	64.9631	-19.0208	Iceland	Europe	Human	H. pylori	Ubiquitous	Human	Tourrette et al., 2024, 10.1038/s41586-024-07991-z from Falush
HEL_CA5009AA_AS	NO	NO	hpEurope	YES	0.8976	1	Entero	40.45	-3.25	Spain	Europe	Human	H. pylori	Ubiquitous	Human	Tourrette et al., 2024, 10.1038/s41586-024-07991-z from Falush
HEL_CA5626AA_AS	NO	NO	hpEurope	YES	0.8976	1	Entero	38.7946	-106.535	United_States	North_America	Human	H. pylori	Ubiquitous	Human	Tourrette et al., 2024, 10.1038/s41586-024-07991-z from Falush
HEL_CA5592AA_AS	NO	NO	hpEurope	YES	0.8976	1	Entero	38.7946	-106.535	United_States	North_America	Human	H. pylori	Ubiquitous	Human	Tourrette et al., 2024, 10.1038/s41586-024-07991-z from Falush
HEL_CA4925AA_AS	NO	NO	hpEurope	YES	0.8975	1	Entero	18.2208	-66.5901	Puerto_Rico	North_America	Human	H. pylori	Ubiquitous	Human	Tourrette et al., 2024, 10.1038/s41586-024-07991-z from Falush
HEL_CA4358AA_AS	NO	NO	hpEurope	YES	0.8974	1	Entero	4.57087	-74.2973	Colombia	South_America	Human	H. pylori	Ubiquitous	Human	Tourrette et al., 2024, 10.1038/s41586-024-07991-z from Falush
HEL_CA4330AA_AS	NO	NO	hpEurope	YES	0.8973	1	Entero	4.57087	-74.2973	Colombia	South_America	Human	H. pylori	Ubiquitous	Human	Tourrette et al., 2024, 10.1038/s41586-024-07991-z from Falush
HEL_CA4899AA_AS	NO	NO	hpEurope	YES	0.8973	1	Entero	39.3999	-8.22445	Portugal	Europe	Human	H. pylori	Ubiquitous	Human	Tourrette et al., 2024, 10.1038/s41586-024-07991-z from Falush
HEL_CA4915AA_AS	NO	NO	hpEurope	YES	0.8973	1	Entero	18.2208	-66.5901	Puerto_Rico	North_America	Human	H. pylori	Ubiquitous	Human	Tourrette et al., 2024, 10.1038/s41586-024-07991-z from Falush
HEL_CA4937AA_AS	NO	NO	hpEurope	YES	0.8973	1	Entero	49.26	136.32	Russia	North_Asia	Human	H. pylori	Ubiquitous	Human	Tourrette et al., 2024, 10.1038/s41586-024-07991-z from Falush
HEL_CA4381AA_AS	NO	NO	hpEurope	YES	0.8972	1	Entero	-35.6751	-71.543	Chile	South_America	Human	H. pylori	Ubiquitous	Human	Tourrette et al., 2024, 10.1038/s41586-024-07991-z from Falush
HEL_CA4934AA_AS	NO	NO	hpEurope	YES	0.8969	1	Entero	49.26	136.32	Russia	North_Asia	Human	H. pylori	Ubiquitous	Human	Tourrette et al., 2024, 10.1038/s41586-024-07991-z from Falush
HEL_CA5005AA_AS	NO	NO	hpEurope	YES	0.8969	1	Entero	40.45	-3.25	Spain	Europe	Human	H. pylori	Ubiquitous	Human	Tourrette et al., 2024, 10.1038/s41586-024-07991-z from Falush
HEL_CA4886AA_AS	NO	NO	hpEurope	YES	0.8968	1	Entero	51.9194	19.1451	Poland	Europe	Human	H. pylori	Ubiquitous	Human	Tourrette et al., 2024, 10.1038/s41586-024-07991-z from Falush
HEL_CA4414AA_AS	NO	NO	hpEurope	YES	0.8967	1	Entero	-38.4161	-63.6167	Argentina	South_America	Human	H. pylori	Ubiquitous	Human	Tourrette et al., 2024, 10.1038/s41586-024-07991-z from Falush
HEL_CA4419AA_AS	NO	NO	hpEurope	YES	0.8967	1	Entero	-38.4161	-63.6167	Argentina	South_America	Human	H. pylori	Ubiquitous	Human	Tourrette et al., 2024, 10.1038/s41586-024-07991-z from Falush
HEL_CA5706AA_AS	NO	NO	hpEurope	YES	0.8965	1	Entero	38.7946	-106.535	United_States	North_America	Human	H. pylori	Ubiquitous	Human	Tourrette et al., 2024, 10.1038/s41586-024-07991-z from Falush
HEL_CA4429AA_AS	NO	NO	hpEurope	YES	0.8964	1	Entero	28.0339	1.65963	Algeria	Africa	Human	H. pylori	Ubiquitous	Human	Tourrette et al., 2024, 10.1038/s41586-024-07991-z from Falush
HEL_CA4207AA_AS	NO	NO	hpEurope	YES	0.8964	1	Entero	-35.6751	-71.543	Chile	South_America	Human	H. pylori	Ubiquitous	Human	Tourrette et al., 2024, 10.1038/s41586-024-07991-z from Falush
HEL_CA4751AA_AS	NO	NO	hpEurope	YES	0.8962	1	Entero	55.1694	23.8813	Lithuania	Europe	Human	H. pylori	Ubiquitous	Human	Tourrette et al., 2024, 10.1038/s41586-024-07991-z from Falush
HEL_CA4250AA_AS	NO	NO	hpEurope	YES	0.896	1	Entero	-35.6751	-71.543	Chile	South_America	Human	H. pylori	Ubiquitous	Human	Tourrette et al., 2024, 10.1038/s41586-024-07991-z from Falush
HEL_CA4413AA_AS	NO	NO	hpEurope	YES	0.8959	1	Entero	28.0339	1.65963	Algeria	Africa	Human	H. pylori	Ubiquitous	Human	Tourrette et al., 2024, 10.1038/s41586-024-07991-z from Falush
HEL_CA4240AA_AS	NO	NO	hpEurope	YES	0.8959	1	Entero	4.57087	-74.2973	Colombia	South_America	Human	H. pylori	Ubiquitous	Human	Tourrette et al., 2024, 10.1038/s41586-024-07991-z from Falush
HEL_CA4905AA_AS	NO	NO	hpEurope	YES	0.8959	1	Entero	39.3999	-8.22445	Portugal	Europe	Human	H. pylori	Ubiquitous	Human	Tourrette et al., 2024, 10.1038/s41586-024-07991-z from Falush
HEL_CA4174AA_AS	NO	NO	hpEurope	YES	0.8955	1	Entero	4.57087	-74.2973	Colombia	South_America	Human	H. pylori	Ubiquitous	Human	Tourrette et al., 2024, 10.1038/s41586-024-07991-z from Falush
HEL_CA4287AA_AS	NO	NO	hpEurope	YES	0.8954	1	Entero	28.0339	1.65963	Algeria	Africa	Human	H. pylori	Ubiquitous	Human	Tourrette et al., 2024, 10.1038/s41586-024-07991-z from Falush
HEL_CA5020AA_AS	NO	NO	hpEurope	YES	0.8954	1	Entero	40.45	-3.25	Spain	Europe	Human	H. pylori	Ubiquitous	Human	Tourrette et al., 2024, 10.1038/s41586-024-07991-z from Falush
HEL_CA5669AA_AS	NO	NO	hpEurope	YES	0.8954	1	Entero	38.9637	35.2433	Turkey	Europe	Human	H. pylori	Ubiquitous	Human	Tourrette et al., 2024, 10.1038/s41586-024-07991-z from Falush
HEL_CA4228AA_AS	NO	NO	hpEurope	YES	0.8953	1	Entero	4.57087	-74.2973	Colombia	South_America	Human	H. pylori	Ubiquitous	Human	Tourrette et al., 2024, 10.1038/s41586-024-07991-z from Falush
HEL_CA4920AA_AS	NO	NO	hpEurope	YES	0.8953	1	Entero	18.2208	-66.5901	Puerto_Rico	North_America	Human	H. pylori	Ubiquitous	Human	Tourrette et al., 2024, 10.1038/s41586-024-07991-z from Falush
HEL_CA4353AA_AS	NO	NO	hpEurope	YES	0.8952	1	Entero	4.57087	-74.2973	Colombia	South_America	Human	H. pylori	Ubiquitous	Human	Tourrette et al., 2024, 10.1038/s41586-024-07991-z from Falush
HEL_CA4464AA_AS	NO	NO	hpEurope	YES	0.8952	1	Entero	39.0742	21.8243	Greece	Europe	Human	H. pylori	Ubiquitous	Human	Tourrette et al., 2024, 10.1038/s41586-024-07991-z from Falush
HEL_CA4590AA_AS	NO	NO	hpEurope	YES	0.8952	1	Entero	41.8719	12.5674	Italy	Europe	Human	H. pylori	Ubiquitous	Human	Tourrette et al., 2024, 10.1038/s41586-024-07991-z from Falush
HEL_CA4215AA_AS	NO	NO	hpEurope	YES	0.8951	1	Entero	-35.6751	-71.543	Chile	South_America	Human	H. pylori	Ubiquitous	Human	Tourrette et al., 2024, 10.1038/s41586-024-07991-z from Falush
HEL_CA4452AA_AS	NO	NO	hpEurope	YES	0.8951	1	Entero	46.2276	2.21375	France	Europe	Human	H. pylori	Ubiquitous	Human	Tourrette et al., 2024, 10.1038/s41586-024-07991-z from Falush
HEL_CA4902AA_AS	NO	NO	hpEurope	YES	0.8949	1	Entero	39.3999	-8.22445	Portugal	Europe	Human	H. pylori	Ubiquitous	Human	Tourrette et al., 2024, 10.1038/s41586-024-07991-z from Falush
HEL_CA4914AA_AS	NO	NO	hpEurope	YES	0.8947	1	Entero	39.3999	-8.22445	Portugal	Europe	Human	H. pylori	Ubiquitous	Human	Tourrette et al., 2024, 10.1038/s41586-024-07991-z from Falush
HEL_CA5432AA_AS	NO	NO	hpEurope	YES	0.8947	1	Entero	-30.5595	22.9375	South_Africa	Africa	Human	H. pylori	Ubiquitous	Human	Tourrette et al., 2024, 10.1038/s41586-024-07991-z from Falush
HEL_CA4326AA_AS	NO	NO	hpEurope	YES	0.8945	1	Entero	4.57087	-74.2973	Colombia	South_America	Human	H. pylori	Ubiquitous	Human	Tourrette et al., 2024, 10.1038/s41586-024-07991-z from Falush
HEL_CA4591AA_AS	NO	NO	hpEurope	YES	0.8945	1	Entero	41.8719	12.5674	Italy	Europe	Human	H. pylori	Ubiquitous	Human	Tourrette et al., 2024, 10.1038/s41586-024-07991-z from Falush
HEL_CA4983AA_AS	NO	NO	hpEurope	YES	0.8945	1	Entero	40.45	-3.25	Spain	Europe	Human	H. pylori	Ubiquitous	Human	Tourrette et al., 2024, 10.1038/s41586-024-07991-z from Falush
HEL_CA4987AA_AS	NO	NO	hpEurope	YES	0.8945	1	Entero	40.45	-3.25	Spain	Europe	Human	H. pylori	Ubiquitous	Human	Tourrette et al., 2024, 10.1038/s41586-024-07991-z from Falush
HEL_CA4406AA_AS	NO	NO	hpEurope	YES	0.8942	1	Entero	-35.6751	-71.543	Chile	South_America	Human	H. pylori	Ubiquitous	Human	Tourrette et al., 2024, 10.1038/s41586-024-07991-z from Falush
HEL_CA4482AA_AS	NO	NO	hpEurope	YES	0.8942	1	Entero	51.1657	10.4515	Germany	Europe	Human	H. pylori	Ubiquitous	Human	Tourrette et al., 2024, 10.1038/s41586-024-07991-z from Falush
HEL_CA4587AA_AS	NO	NO	hpEurope	YES	0.8941	1	Entero	31.0461	34.8516	Israel	West_Asia	Human	H. pylori	Ubiquitous	Human	Tourrette et al., 2024, 10.1038/s41586-024-07991-z from Falush
HEL_CA4249AA_AS	NO	NO	hpEurope	YES	0.8939	1	Entero	-35.6751	-71.543	Chile	South_America	Human	H. pylori	Ubiquitous	Human	Tourrette et al., 2024, 10.1038/s41586-024-07991-z from Falush
HEL_CA4310AA_AS	NO	NO	hpEurope	YES	0.8937	1	Entero	4.57087	-74.2973	Colombia	South_America	Human	H. pylori	Ubiquitous	Human	Tourrette et al., 2024, 10.1038/s41586-024-07991-z from Falush
HEL_CA4996AA_AS	NO	NO	hpEurope	YES	0.8934	1	Entero	40.45	-3.25	Spain	Europe	Human	H. pylori	Ubiquitous	Human	Tourrette et al., 2024, 10.1038/s41586-024-07991-z from Falush
HEL_CA4400AA_AS	NO	NO	hpEurope	YES	0.8933	1	Entero	-35.6751	-71.543	Chile	South_America	Human	H. pylori	Ubiquitous	Human	Tourrette et al., 2024, 10.1038/s41586-024-07991-z from Falush
HEL_CA5003AA_AS	NO	NO	hpEurope	YES	0.8933	1	Entero	40.45	-3.25	Spain	Europe	Human	H. pylori	Ubiquitous	Human	Tourrette et al., 2024, 10.1038/s41586-024-07991-z from Falush
HEL_CA4378AA_AS	NO	NO	hpEurope	YES	0.8932	1	Entero	-35.6751	-71.543	Chile	South_America	Human	H. pylori	Ubiquitous	Human	Tourrette et al., 2024, 10.1038/s41586-024-07991-z from Falush
HEL_CA4283AA_AS	NO	NO	hpEurope	YES	0.8929	1	Entero	28.0339	1.65963	Algeria	Africa	Human	H. pylori	Ubiquitous	Human	Tourrette et al., 2024, 10.1038/s41586-024-07991-z from Falush
HEL_CA4510AA_AS	NO	NO	hpEurope	YES	0.8929	1	Entero	64.9631	-19.0208	Iceland	Europe	Human	H. pylori	Ubiquitous	Human	Tourrette et al., 2024, 10.1038/s41586-024-07991-z from Falush
HEL_CA4607AA_AS	NO	NO	hpEurope	YES	0.8928	1	Entero	41.8719	12.5674	Italy	Europe	Human	H. pylori	Ubiquitous	Human	Tourrette et al., 2024, 10.1038/s41586-024-07991-z from Falush
HEL_CA4514AA_AS	NO	NO	hpEurope	YES	0.8927	1	Entero	15.2	-86.2419	Honduras	North_America	Human	H. pylori	Ubiquitous	Human	Tourrette et al., 2024, 10.1038/s41586-024-07991-z from Falush
HEL_CA5149AA_AS	NO	NO	hpEurope	YES	0.8927	1	Entero	46.8182	8.22751	Switzerland	Europe	Human	H. pylori	Ubiquitous	Human	Tourrette et al., 2024, 10.1038/s41586-024-07991-z from Falush
HEL_CA4541AA_AS	NO	NO	hpEurope	YES	0.8925	1	Entero	32.4279	53.688	Iran	West_Asia	Human	H. pylori	Ubiquitous	Human	Tourrette et al., 2024, 10.1038/s41586-024-07991-z from Falush
HEL_CA4151AA_AS	NO	NO	hpEurope	YES	0.8922	1	Entero	18.7357	-70.1627	Dominican_Republic	South_America	Human	H. pylori	Ubiquitous	Human	Tourrette et al., 2024, 10.1038/s41586-024-07991-z from Falush
HEL_CA4991AA_AS	NO	NO	hpEurope	YES	0.8921	1	Entero	40.45	-3.25	Spain	Europe	Human	H. pylori	Ubiquitous	Human	Tourrette et al., 2024, 10.1038/s41586-024-07991-z from Falush
HEL_CA5065AA_AS	NO	NO	hpEurope	YES	0.8921	1	Entero	59.51	38.28	Sweden	Europe	Human	H. pylori	Ubiquitous	Human	Tourrette et al., 2024, 10.1038/s41586-024-07991-z from Falush
HEL_CA4512AA_AS	NO	NO	hpEurope	YES	0.892	1	Entero	-0.789275	113.921	Indonesia	Southeast_Asia	Human	H. pylori	Ubiquitous	Human	Tourrette et al., 2024, 10.1038/s41586-024-07991-z from Falush
HEL_CA5031AA_AS	NO	NO	hpEurope	YES	0.892	1	Entero	40.45	-3.25	Spain	Europe	Human	H. pylori	Ubiquitous	Human	Tourrette et al., 2024, 10.1038/s41586-024-07991-z from Falush
HEL_BA3570AA_AS	NO	NO	hpEurope	YES	0.8919	1	Entero	51.1657	10.4515	Germany	Europe	Human	H. pylori	Ubiquitous	Human	Ailloud et al., 2019, 10.1038/s41467-019-10050-1
HEL_CA4794AA_AS	NO	NO	hpEurope	YES	0.8919	1	Entero	23.6345	-102.553	Mexico	North_America	Human	H. pylori	Ubiquitous	Human	Tourrette et al., 2024, 10.1038/s41586-024-07991-z from Falush
HEL_CA4522AA_AS	NO	NO	hpEurope	YES	0.8916	1	Entero	-0.789275	113.921	Indonesia	Southeast_Asia	Human	H. pylori	Ubiquitous	Human	Tourrette et al., 2024, 10.1038/s41586-024-07991-z from Falush
HEL_CA4876AA_AS	NO	NO	hpEurope	YES	0.8916	1	Entero	51.9194	19.1451	Poland	Europe	Human	H. pylori	Ubiquitous	Human	Tourrette et al., 2024, 10.1038/s41586-024-07991-z from Falush
HEL_CA5039AA_AS	NO	NO	hpEurope	YES	0.8915	1	Entero	40.45	-3.25	Spain	Europe	Human	H. pylori	Ubiquitous	Human	Tourrette et al., 2024, 10.1038/s41586-024-07991-z from Falush
HEL_CA5049AA_AS	NO	NO	hpEurope	YES	0.8912	1	Entero	40.45	-3.25	Spain	Europe	Human	H. pylori	Ubiquitous	Human	Tourrette et al., 2024, 10.1038/s41586-024-07991-z from Falush
HEL_CA4354AA_AS	NO	NO	hpEurope	YES	0.891	1	Entero	4.57087	-74.2973	Colombia	South_America	Human	H. pylori	Ubiquitous	Human	Tourrette et al., 2024, 10.1038/s41586-024-07991-z from Falush
HEL_CA4830AA_AS	NO	NO	hpEurope	YES	0.891	1	Entero	28.3949	84.124	Nepal	South_Asia	Human	H. pylori	Ubiquitous	Human	Tourrette et al., 2024, 10.1038/s41586-024-07991-z from Falush
HEL_CA4334AA_AS	NO	NO	hpEurope	YES	0.8909	1	Entero	4.57087	-74.2973	Colombia	South_America	Human	H. pylori	Ubiquitous	Human	Tourrette et al., 2024, 10.1038/s41586-024-07991-z from Falush
HEL_CA4922AA_AS	NO	NO	hpEurope	YES	0.8909	1	Entero	49.26	136.32	Russia	North_Asia	Human	H. pylori	Ubiquitous	Human	Tourrette et al., 2024, 10.1038/s41586-024-07991-z from Falush
HEL_CA4114AA_AS	NO	NO	hpEurope	YES	0.8908	1	Entero	23.685	90.3563	Bangladesh	South_Asia	Human	H. pylori	Ubiquitous	Human	Tourrette et al., 2024, 10.1038/s41586-024-07991-z from Falush
HEL_CA4755AA_AS	NO	NO	hpEurope	YES	0.8908	1	Entero	55.1694	23.8813	Lithuania	Europe	Human	H. pylori	Ubiquitous	Human	Tourrette et al., 2024, 10.1038/s41586-024-07991-z from Falush
HEL_CA4538AA_AS	NO	NO	hpEurope	YES	0.8903	1	Entero	38	21	Greece	Europe	Human	H. pylori	Ubiquitous	Human	Tourrette et al., 2024, 10.1038/s41586-024-07991-z from Falush
HEL_CA4903AA_AS	NO	NO	hpEurope	YES	0.8903	1	Entero	39.3999	-8.22445	Portugal	Europe	Human	H. pylori	Ubiquitous	Human	Tourrette et al., 2024, 10.1038/s41586-024-07991-z from Falush
HEL_CA4642AA_AS	NO	NO	hpEurope	YES	0.8898	1	Entero	30.5852	36.2384	Jordan	West_Asia	Human	H. pylori	Ubiquitous	Human	Tourrette et al., 2024, 10.1038/s41586-024-07991-z from Falush
HEL_CA4128AA_AS	NO	NO	hpEurope	YES	0.8897	1	Entero	18.7357	-70.1627	Dominican_Republic	South_America	Human	H. pylori	Ubiquitous	Human	Tourrette et al., 2024, 10.1038/s41586-024-07991-z from Falush
HEL_CA4160AA_AS	NO	NO	hpEurope	YES	0.8883	1	Entero	-35.6751	-71.543	Chile	South_America	Human	H. pylori	Ubiquitous	Human	Tourrette et al., 2024, 10.1038/s41586-024-07991-z from Falush
HEL_CA4117AA_AS	NO	NO	hpEurope	YES	0.888	1	Entero	23.685	90.3563	Bangladesh	South_Asia	Human	H. pylori	Ubiquitous	Human	Tourrette et al., 2024, 10.1038/s41586-024-07991-z from Falush
HEL_CA4882AA_AS	NO	NO	hpEurope	YES	0.8879	1	Entero	51.9194	19.1451	Poland	Europe	Human	H. pylori	Ubiquitous	Human	Tourrette et al., 2024, 10.1038/s41586-024-07991-z from Falush
HEL_CA5054AA_AS	NO	NO	hpEurope	YES	0.8873	1	Entero	40.45	-3.25	Spain	Europe	Human	H. pylori	Ubiquitous	Human	Tourrette et al., 2024, 10.1038/s41586-024-07991-z from Falush
HEL_CA4231AA_AS	NO	NO	hpEurope	YES	0.887	1	Entero	-35.6751	-71.543	Chile	South_America	Human	H. pylori	Ubiquitous	Human	Tourrette et al., 2024, 10.1038/s41586-024-07991-z from Falush
HEL_CA4581AA_AS	NO	NO	hpEurope	YES	0.8869	1	Entero	31.0461	34.8516	Israel	West_Asia	Human	H. pylori	Ubiquitous	Human	Tourrette et al., 2024, 10.1038/s41586-024-07991-z from Falush
HEL_CA5042AA_AS	NO	NO	hpEurope	YES	0.8857	1	Entero	40.45	-3.25	Spain	Europe	Human	H. pylori	Ubiquitous	Human	Tourrette et al., 2024, 10.1038/s41586-024-07991-z from Falush
HEL_CA4999AA_AS	NO	NO	hpEurope	YES	0.8857	1	Entero	40.45	-3.25	Spain	Europe	Human	H. pylori	Ubiquitous	Human	Tourrette et al., 2024, 10.1038/s41586-024-07991-z from Falush
HEL_CA4962AA_AS	NO	NO	hpEurope	YES	0.8853	1	Entero	40.45	-3.25	Spain	Europe	Human	H. pylori	Ubiquitous	Human	Tourrette et al., 2024, 10.1038/s41586-024-07991-z from Falush
HEL_CA4750AA_AS	NO	NO	hpEurope	YES	0.885	1	Entero	56.8796	24.6032	Latvia	Europe	Human	H. pylori	Ubiquitous	Human	Tourrette et al., 2024, 10.1038/s41586-024-07991-z from Falush
HEL_BA3588AA_AS	NO	NO	hpEurope	YES	0.8841	1	Entero	51.1657	10.4515	Germany	Europe	Human	H. pylori	Ubiquitous	Human	Ailloud et al., 2019, 10.1038/s41467-019-10050-1
HEL_CA4460AA_AS	NO	NO	hpEurope	YES	0.8806	1	Entero	51.1657	10.4515	Germany	Europe	Human	H. pylori	Ubiquitous	Human	Tourrette et al., 2024, 10.1038/s41586-024-07991-z from Falush
HEL_CA4451AA_AS	NO	NO	hpEurope	YES	0.8803	1	Entero	46.2276	2.21375	France	Europe	Human	H. pylori	Ubiquitous	Human	Tourrette et al., 2024, 10.1038/s41586-024-07991-z from Falush
GCA_016749025.1	NO	NO	hpEurope	YES	0.9339	1	NCBI	-9.18997	-75.0152	Peru	South_America	Human	H. pylori	Ubiquitous	Human	Gutierrez-Escobar et al., 2020, 10.3389/fmicb.2020.601839
GCA_016748555.1	NO	NO	hpEurope	YES	0.9323	1	NCBI	-9.18997	-75.0152	Peru	South_America	Human	H. pylori	Ubiquitous	Human	Gutierrez-Escobar et al., 2020, 10.3389/fmicb.2020.601839
GCA_016749215.1	NO	NO	hpEurope	YES	0.9166	1	NCBI	-9.18997	-75.0152	Peru	South_America	Human	H. pylori	Ubiquitous	Human	Gutierrez-Escobar et al., 2020, 10.3389/fmicb.2020.601839
GCA_016748675.1	NO	NO	hpEurope	YES	0.9136	1	NCBI	-9.18997	-75.0152	Peru	South_America	Human	H. pylori	Ubiquitous	Human	Gutierrez-Escobar et al., 2020, 10.3389/fmicb.2020.601839
GCA_016749335.1	NO	NO	hpEurope	YES	0.9113	1	NCBI	-9.18997	-75.0152	Peru	South_America	Human	H. pylori	Ubiquitous	Human	Gutierrez-Escobar et al., 2020, 10.3389/fmicb.2020.601839
GCA_016748795.1	NO	NO	hpEurope	YES	0.9012	1	NCBI	-9.18997	-75.0152	Peru	South_America	Human	H. pylori	Ubiquitous	Human	Gutierrez-Escobar et al., 2020, 10.3389/fmicb.2020.601839
GCA_016757535.1	NO	NO	hpEurope	YES	0.9	1	NCBI	-9.18997	-75.0152	Peru	South_America	Human	H. pylori	Ubiquitous	Human	Gutierrez-Escobar et al., 2020, 10.3389/fmicb.2020.601839
GCA_016749085.1	NO	NO	hpEurope	YES	0.8948	1	NCBI	-9.18997	-75.0152	Peru	South_America	Human	H. pylori	Ubiquitous	Human	Gutierrez-Escobar et al., 2020, 10.3389/fmicb.2020.601839
GCA_016749575.1	NO	NO	hpEurope	YES	0.8886	1	NCBI	-9.18997	-75.0152	Peru	South_America	Human	H. pylori	Ubiquitous	Human	Gutierrez-Escobar et al., 2020, 10.3389/fmicb.2020.601839
GCA_016755635.1	NO	NO	hpEurope	YES	0.8869	1	NCBI	-9.18997	-75.0152	Peru	South_America	Human	H. pylori	Ubiquitous	Human	Gutierrez-Escobar et al., 2020, 10.3389/fmicb.2020.601839
HEL_AA0404AA_AS	NO	NO	hpEurope	YES	0.954	2	Entero	51.1657	10.4515	Germany	Europe	Human	H. pylori	Ubiquitous	Human	Tourrette et al., 2024, 10.1038/s41586-024-07991-z from Entero database
HEL_AA0405AA_AS	NO	NO	hpEurope	YES	0.9396	2	Entero	41.8719	12.5674	Italy	Europe	Human	H. pylori	Ubiquitous	Human	Tourrette et al., 2024, 10.1038/s41586-024-07991-z from Entero database
HEL_BA3536AA_AS	NO	NO	hpEurope	YES	0.9361	2	Entero	23.6345	-102.553	Mexico	North_America	Human	H. pylori	Ubiquitous	Human	Camorlinga-Ponce et al., 2021, 10.3389/fcimb.2020.539115
HEL_CA0131AA_AS	NO	NO	hpEurope	YES	0.9332	2	Entero	51.1657	10.4515	Germany	Europe	Human	H. pylori	Ubiquitous	Human	Sichtig et al., 2019, 10.1038/s41467-019-11306-6
HEL_AA0367AA_AS	NO	NO	hpEurope	YES	0.9315	2	Entero	55.1694	23.8813	Lithuania	Europe	Human	H. pylori	Ubiquitous	Human	NCBI
HEL_BA3552AA_AS	NO	NO	hpEurope	YES	0.9182	2	Entero	23.6345	-102.553	Mexico	North_America	Human	H. pylori	Ubiquitous	Human	Camorlinga-Ponce et al., 2021, 10.3389/fcimb.2020.539115
HEL_AA0372AA_AS	NO	NO	hpEurope	YES	0.9176	2	Entero	-1.34232	-48.361	El_Salvador	North_America	Human	H. pylori	Ubiquitous	Human	NCBI
HEL_BA3553AA_AS	NO	NO	hpEurope	YES	0.9173	2	Entero	23.6345	-102.553	Mexico	North_America	Human	H. pylori	Ubiquitous	Human	Camorlinga-Ponce et al., 2021, 10.3389/fcimb.2020.539115
HEL_BA5533AA_AS	NO	NO	hpEurope	YES	0.9143	2	Entero	38.7946	-106.535	United_States	North_America	Human	H. pylori	Ubiquitous	Human	Blanchard et al., 2013, 10.1111/2049-632X.12045
HEL_AA0407AA_AS	NO	NO	hpEurope	YES	0.914	2	Entero	60.1282	18.6435	Sweden	Europe	Human	H. pylori	Ubiquitous	Human	Tourrette et al., 2024, 10.1038/s41586-024-07991-z from Entero database
HEL_CA3180AA_AS	NO	NO	hpEurope	YES	0.9099	2	Entero	20.5937	78.9629	India	South_Asia	Human	H. pylori	Ubiquitous	Human	Tourrette et al., 2024, 10.1038/s41586-024-07991-z from Falush
HEL_AA0332AA_AS	NO	NO	hpEurope	YES	0.9092	2	Entero	19.3327	-99.1792	Mexico	North_America	Human	H. pylori	Ubiquitous	Human	Mucito-Varela et al., 2016, 10.1128/genomeA.01512-15
HEL_BA9924AA_AS	NO	NO	hpEurope	YES	0.9089	2	Entero	26.9	112.56	China	East_Asia	Human	H. pylori	Ubiquitous	Human	Hu et al., 2023, 10.1128/spectrum.04522-22
HEL_CA5503AA_AS	NO	NO	hpEurope	YES	0.9079	2	Entero	40.45	-3.25	Spain	Europe	Human	H. pylori	Ubiquitous	Human	Tourrette et al., 2024, 10.1038/s41586-024-07991-z from Falush
HEL_BA3541AA_AS	NO	NO	hpEurope	YES	0.905	2	Entero	23.6345	-102.553	Mexico	North_America	Human	H. pylori	Ubiquitous	Human	Camorlinga-Ponce et al., 2021, 10.3389/fcimb.2020.539115
HEL_BA5478AA_AS	NO	NO	hpEurope	YES	0.9033	2	Entero	5	-72	Colombia	South_America	Human	H. pylori	Ubiquitous	Human	Blanchard et al., 2013, 10.1111/2049-632X.12045
HEL_BA4273AA_AS	NO	NO	hpEurope	YES	0.8979	2	Entero	50.5039	4.46994	Belgium	Europe	Human	H. pylori	Ubiquitous	Human	EBI
GCA_017821235.1	NO	NO	hpEurope	YES	0.9197	2	NCBI	4.57087	-74.2973	Colombia	South_America	Human	H. pylori	Ubiquitous	Human	Mannion et al., 2021, 10.1128/JCM.03203-20
GCA_013122055.1	NO	NO	hpEurope	YES	0.8943	2	NCBI	61.524	105.319	Russia	North_Asia	Human	H. pylori	Ubiquitous	Human	Tourrette et al., 2024, 10.1038/s41586-024-07991-z from NCBI
GCA_013122035.1	NO	NO	hpEurope	YES	0.8935	2	NCBI	61.524	105.319	Russia	North_Asia	Human	H. pylori	Ubiquitous	Human	Tourrette et al., 2024, 10.1038/s41586-024-07991-z from NCBI
GCA_013122115.1	NO	NO	hpEurope	YES	0.8934	2	NCBI	61.524	105.319	Russia	North_Asia	Human	H. pylori	Ubiquitous	Human	Tourrette et al., 2024, 10.1038/s41586-024-07991-z from NCBI
HEL_AA4466AA_AS	NO	NO	hpEurope	YES	0.9174	3	Entero	52.26	30.59	Belarus	Europe	Human	H. pylori	Ubiquitous	Human	Gomel state medical universitate
HEL_BA8151AA_AS	NO	NO	hpEurope	YES	0.9101	3	Entero	38.7946	-106.535	United_States	North_America	Human	H. pylori	Ubiquitous	Human	Blanchard et al., 2013, 10.1111/2049-632X.12045
HEL_BA3549AA_AS	NO	NO	hpEurope	YES	0.9224	4	Entero	23.6345	-102.553	Mexico	North_America	Human	H. pylori	Ubiquitous	Human	Camorlinga-Ponce et al., 2021, 10.3389/fcimb.2020.539115
HEL_BA5567AA_AS	NO	NO	hpEurope	YES	0.9184	4	Entero	5	-72	Colombia	South_America	Human	H. pylori	Ubiquitous	Human	Blanchard et al., 2013, 10.1111/2049-632X.12045
HEL_BA5489AA_AS	NO	NO	hpEurope	YES	0.9155	4	Entero	38.7946	-106.535	United_States	North_America	Human	H. pylori	Ubiquitous	Human	Blanchard et al., 2013, 10.1111/2049-632X.12045
HEL_BA5563AA_AS	NO	NO	hpEurope	YES	0.9105	5	Entero	38.7946	-106.535	United_States	North_America	Human	H. pylori	Ubiquitous	Human	Blanchard et al., 2013, 10.1111/2049-632X.12045
HEL_BA8152AA_AS	NO	NO	hpEurope	YES	0.8893	5	Entero	38.7946	-106.535	United_States	North_America	Human	H. pylori	Ubiquitous	Human	Blanchard et al., 2013, 10.1111/2049-632X.12045
HEL_BA5458AA_AS	NO	NO	hpEurope	YES	0.8889	5	Entero	-0.789275	113.921	Indonesia	Southeast_Asia	Human	H. pylori	Ubiquitous	Human	Institute for Genome Sciences University of MD School of Medicine
HEL_BA5571AA_AS	NO	NO	hpEurope	YES	0.9242	6	Entero	5	-72	Colombia	South_America	Human	H. pylori	Ubiquitous	Human	Blanchard et al., 2013, 10.1111/2049-632X.12045
HEL_BA5570AA_AS	NO	NO	hpEurope	YES	0.9239	6	Entero	5	-72	Colombia	South_America	Human	H. pylori	Ubiquitous	Human	Blanchard et al., 2013, 10.1111/2049-632X.12045
HEL_BA5569AA_AS	NO	NO	hpEurope	YES	0.9216	6	Entero	5	-72	Colombia	South_America	Human	H. pylori	Ubiquitous	Human	Blanchard et al., 2013, 10.1111/2049-632X.12045
HEL_BA5511AA_AS	NO	NO	hpEurope	YES	0.9209	6	Entero	38.7946	-106.535	United_States	North_America	Human	H. pylori	Ubiquitous	Human	Blanchard et al., 2013, 10.1111/2049-632X.12045
HEL_CA5495AA_AS	NO	NO	hpEurope	YES	0.9197	6	Entero	38.7946	-106.535	United_States	North_America	Human	H. pylori	Ubiquitous	Human	Tourrette et al., 2024, 10.1038/s41586-024-07991-z from Falush
HEL_BA5039AA_AS	NO	NO	hpEurope	YES	0.9041	6	Entero	50.5039	4.46994	Belgium	Europe	Human	H. pylori	Ubiquitous	Human	EBI
HEL_BA5508AA_AS	NO	NO	hpEurope	YES	0.9005	7	Entero	5	-72	Colombia	South_America	Human	H. pylori	Ubiquitous	Human	Blanchard et al., 2013, 10.1111/2049-632X.12045
HEL_CA5515AA_AS	NO	NO	hpEurope	YES	0.8986	7	Entero	38.7946	-106.535	United_States	North_America	Human	H. pylori	Ubiquitous	Human	Tourrette et al., 2024, 10.1038/s41586-024-07991-z from Falush
HEL_BA5525AA_AS	NO	NO	hpEurope	YES	0.9121	8	Entero	56.1304	-106.347	Canada	North_America	Human	H. pylori	Ubiquitous	Human	Blanchard et al., 2013, 10.1111/2049-632X.12045
HEL_BA5522AA_AS	NO	NO	hpEurope	YES	0.8941	8	Entero	56.1304	-106.347	Canada	North_America	Human	H. pylori	Ubiquitous	Human	Blanchard et al., 2013, 10.1111/2049-632X.12045
HEL_BA5509AA_AS	NO	NO	hpEurope	YES	0.9302	9	Entero	38.7946	-106.535	United_States	North_America	Human	H. pylori	Ubiquitous	Human	Blanchard et al., 2013, 10.1111/2049-632X.12045
HEL_BA5551AA_AS	NO	NO	hpEurope	YES	0.9132	9	Entero	38.7946	-106.535	United_States	North_America	Human	H. pylori	Ubiquitous	Human	Blanchard et al., 2013, 10.1111/2049-632X.12045
HEL_BA5524AA_AS	NO	NO	hpEurope	YES	0.8988	9	Entero	56.1304	-106.347	Canada	North_America	Human	H. pylori	Ubiquitous	Human	Blanchard et al., 2013, 10.1111/2049-632X.12045
HEL_BA8141AA_AS	NO	NO	hpEurope	YES	0.9047	10	Entero	56.1304	-106.347	Canada	North_America	Human	H. pylori	Ubiquitous	Human	Blanchard et al., 2013, 10.1111/2049-632X.12045
HEL_BA8128AA_AS	NO	NO	hpEurope	YES	0.923	11	Entero	38.7946	-106.535	United_States	North_America	Human	H. pylori	Ubiquitous	Human	Blanchard et al., 2013, 10.1111/2049-632X.12045
HEL_BA5501AA_AS	NO	NO	hpEurope	YES	0.922	12	Entero	5	-72	Colombia	South_America	Human	H. pylori	Ubiquitous	Human	Blanchard et al., 2013, 10.1111/2049-632X.12045
HEL_CA5343AA_AS	NO	NO	hpEurope	YES	0.9084	12	Entero	32.4279	53.688	Iran	West_Asia	Human	H. pylori	Ubiquitous	Human	Tourrette et al., 2024, 10.1038/s41586-024-07991-z
HEL_BA5557AA_AS	NO	NO	hpEurope	YES	0.9028	12	Entero	38.7946	-106.535	United_States	North_America	Human	H. pylori	Ubiquitous	Human	Blanchard et al., 2013, 10.1111/2049-632X.12045
GCA_008681315.1	NO	NO	hpEurope	YES	0.9131	12	NCBI	23.6345	-102.553	Mexico	North_America	Human	H. pylori	Ubiquitous	Human	Tourrette et al., 2024, 10.1038/s41586-024-07991-z from NCBI
HEL_BA8209AA_AS	NO	NO	hpEurope	YES	0.9104	13	Entero	4.21048	101.976	Malaysia	Southeast_Asia	Human	H. pylori	Ubiquitous	Human	University of Malaya
HEL_BA5520AA_AS	NO	NO	hpEurope	YES	0.9018	13	Entero	56.1304	-106.347	Canada	North_America	Human	H. pylori	Ubiquitous	Human	Blanchard et al., 2013, 10.1111/2049-632X.12045
HEL_BA8170AA_AS	NO	NO	hpEurope	YES	0.9297	14	Entero	38.7946	-106.535	United_States	North_America	Human	H. pylori	Ubiquitous	Human	Blanchard et al., 2013, 10.1111/2049-632X.12045
HEL_BA5572AA_AS	NO	NO	hpEurope	YES	0.9131	14	Entero	5	-72	Colombia	South_America	Human	H. pylori	Ubiquitous	Human	Blanchard et al., 2013, 10.1111/2049-632X.12045
HEL_BA5523AA_AS	NO	NO	hpEurope	YES	0.9049	14	Entero	56.1304	-106.347	Canada	North_America	Human	H. pylori	Ubiquitous	Human	Blanchard et al., 2013, 10.1111/2049-632X.12045
GCA_008681515.1	NO	NO	hpEurope	YES	0.9106	14	NCBI	23.6345	-102.553	Mexico	North_America	Human	H. pylori	Ubiquitous	Human	Tourrette et al., 2024, 10.1038/s41586-024-07991-z from NCBI
HEL_BA8824AA_AS	NO	NO	hpEurope	YES	0.9158	15	Entero	61.524	105.319	Russia	North_Asia	Human	H. pylori	Ubiquitous	Human	Tourrette et al., 2024, 10.1038/s41586-024-07991-z
HEL_AA6546AA_AS	NO	NO	hpEurope	YES	0.9025	15	Entero	39.3999	-8.22445	Portugal	Europe	Human	H. pylori	Ubiquitous	Human	Thorpe et al., 2022, 10.1038/s41467-022-34475-3
HEL_CA5137AA_AS	NO	NO	hpEurope	YES	0.8862	15	Entero	32.4279	53.688	Iran	West_Asia	Human	H. pylori	Ubiquitous	Human	Tourrette et al., 2024, 10.1038/s41586-024-07991-z
GCA_008728675.1	NO	NO	hpEurope	YES	0.9164	15	NCBI	23.6345	-102.553	Mexico	North_America	Human	H. pylori	Ubiquitous	Human	Tourrette et al., 2024, 10.1038/s41586-024-07991-z from NCBI
GCA_008681365.1	NO	NO	hpEurope	YES	0.914	15	NCBI	23.6345	-102.553	Mexico	North_America	Human	H. pylori	Ubiquitous	Human	Tourrette et al., 2024, 10.1038/s41586-024-07991-z from NCBI
GCA_008681245.1	NO	NO	hpEurope	YES	0.8997	15	NCBI	23.6345	-102.553	Mexico	North_America	Human	H. pylori	Ubiquitous	Human	Tourrette et al., 2024, 10.1038/s41586-024-07991-z from NCBI
GCA_014498185.1	NO	NO	hpEurope	YES	0.8927	15	NCBI	40.4637	-3.74922	Spain	Europe	Human	H. pylori	Ubiquitous	Human	Muñoz-Ramirez et al., 2020, 10.1038/s41396-020-00758-0
HEL_CA5266AA_AS	NO	NO	hpEurope	YES	0.9217	16	Entero	32.4279	53.688	Iran	West_Asia	Human	H. pylori	Ubiquitous	Human	Tourrette et al., 2024, 10.1038/s41586-024-07991-z from Falush
HEL_BA5562AA_AS	NO	NO	hpEurope	YES	0.919	16	Entero	38.7946	-106.535	United_States	North_America	Human	H. pylori	Ubiquitous	Human	Blanchard et al., 2013, 10.1111/2049-632X.12045
HEL_BA5521AA_AS	NO	NO	hpEurope	YES	0.9079	16	Entero	56.1304	-106.347	Canada	North_America	Human	H. pylori	Ubiquitous	Human	Blanchard et al., 2013, 10.1111/2049-632X.12045
HEL_AA6815AA_AS	NO	NO	hpEurope	YES	0.8912	16	Entero	-35.6751	-71.543	Chile	South_America	Human	H. pylori	Ubiquitous	Human	Muñoz-Ramirez et al., 2020, 10.1038/s41396-020-00758-0
HEL_BA9255AA_AS	NO	NO	hpEurope	YES	0.8872	16	Entero	-23.36	120.78	Australia	Oceania	Human	H. pylori	Ubiquitous	Human	Tourrette et al., 2024, 10.1038/s41586-024-07991-z
GCA_005796135.1	NO	NO	hpEurope	YES	0.9284	16	NCBI	51.9194	19.1451	Poland	Europe	Human	H. pylori	Ubiquitous	Human	Zawilak-Pawlik et al., 2019, 10.1038/s41598-019-48030-6
GCA_024411835.1	NO	NO	hpEurope	YES	0.9217	16	NCBI	32.4279	53.688	Iran	West_Asia	Human	H. pylori	Ubiquitous	Human	Thorpe et al., 2022, 10.1038/s41467-022-34475-3
GCA_008681425.1	NO	NO	hpEurope	YES	0.9133	16	NCBI	23.6345	-102.553	Mexico	North_America	Human	H. pylori	Ubiquitous	Human	Tourrette et al., 2024, 10.1038/s41586-024-07991-z from NCBI
HEL_BA5496AA_AS	NO	NO	hpEurope	YES	0.9301	17	Entero	38.7946	-106.535	United_States	North_America	Human	H. pylori	Ubiquitous	Human	Blanchard et al., 2013, 10.1111/2049-632X.12045
HEL_CA5256AA_AS	NO	NO	hpEurope	YES	0.9296	17	Entero	32.4279	53.688	Iran	West_Asia	Human	H. pylori	Ubiquitous	Human	Tourrette et al., 2024, 10.1038/s41586-024-07991-z
HEL_CA5567AA_AS	NO	NO	hpEurope	YES	0.9262	17	Entero	32.4279	53.688	Iran	West_Asia	Human	H. pylori	Ubiquitous	Human	Tourrette et al., 2024, 10.1038/s41586-024-07991-z
HEL_BA5568AA_AS	NO	NO	hpEurope	YES	0.9233	17	Entero	5	-72	Colombia	South_America	Human	H. pylori	Ubiquitous	Human	Blanchard et al., 2013, 10.1111/2049-632X.12045
HEL_CA6861AA_AS	NO	NO	hpEurope	YES	0.9166	17	Entero	32.4279	53.688	Iran	West_Asia	Human	H. pylori	Ubiquitous	Human	Tourrette et al., 2024, 10.1038/s41586-024-07991-z
GCA_008681355.1	NO	NO	hpEurope	YES	0.9122	17	NCBI	23.6345	-102.553	Mexico	North_America	Human	H. pylori	Ubiquitous	Human	Tourrette et al., 2024, 10.1038/s41586-024-07991-z from NCBI
HEL_CA5536AA_AS	NO	NO	hpEurope	YES	0.905	18	Entero	32.4279	53.688	Iran	West_Asia	Human	H. pylori	Ubiquitous	Human	Tourrette et al., 2024, 10.1038/s41586-024-07991-z
HEL_BA9699AA_AS	NO	NO	hpEurope	YES	0.9033	18	Entero	4.57087	-74.2973	Colombia	South_America	Human	H. pylori	Ubiquitous	Human	Tourrette et al., 2024, 10.1038/s41586-024-07991-z
HEL_AA4350AA_AS	NO	NO	hpEurope	YES	0.8982	18	Entero	12.1506	-86.2681	Nicaragua	North_America	Human	H. pylori	Ubiquitous	Human	Thorell et al., 2016, 10.1186/s12862-016-0619-y
HEL_BA9068AA_AS	NO	NO	hpEurope	YES	0.8974	18	Entero	-23.36	120.78	Australia	Oceania	Human	H. pylori	Ubiquitous	Human	Tourrette et al., 2024, 10.1038/s41586-024-07991-z
HEL_BA9342AA_AS	NO	NO	hpEurope	YES	0.8918	18	Entero	-23.36	120.78	Australia	Oceania	Human	H. pylori	Ubiquitous	Human	Tourrette et al., 2024, 10.1038/s41586-024-07991-z
GCA_008681335.1	NO	NO	hpEurope	YES	0.912	18	NCBI	23.6345	-102.553	Mexico	North_America	Human	H. pylori	Ubiquitous	Human	Tourrette et al., 2024, 10.1038/s41586-024-07991-z from NCBI
GCA_014498885.1	NO	NO	hpEurope	YES	0.9032	18	NCBI	-38.4161	-63.6167	Argentina	South_America	Human	H. pylori	Ubiquitous	Human	Muñoz-Ramirez et al., 2020, 10.1038/s41396-020-00758-0
GCA_014497365.1	NO	NO	hpEurope	YES	0.8989	18	NCBI	40.4637	-3.74922	Spain	Europe	Human	H. pylori	Ubiquitous	Human	Muñoz-Ramirez et al., 2020, 10.1038/s41396-020-00758-0
HEL_BA9102AA_AS	NO	NO	hpEurope	YES	0.9342	19	Entero	-23.36	120.78	Australia	Oceania	Human	H. pylori	Ubiquitous	Human	Tourrette et al., 2024, 10.1038/s41586-024-07991-z
HEL_AA6655AA_AS	NO	NO	hpEurope	YES	0.9188	19	Entero	39.3999	-8.22445	Portugal	Europe	Human	H. pylori	Ubiquitous	Human	Thorpe et al., 2022, 10.1038/s41467-022-34475-3
HEL_AA8673AA_AS	NO	NO	hpEurope	YES	0.9171	19	Entero	12.1494	-86.311	Nicaragua	North_America	Human	H. pylori	Ubiquitous	Human	kaisa.thorell@gmail.com
HEL_AA8731AA_AS	NO	NO	hpEurope	YES	0.9166	19	Entero	60.1282	18.6435	Sweden	Europe	Human	H. pylori	Ubiquitous	Human	Tourrette et al., 2024, 10.1038/s41586-024-07991-z
HEL_AA8749AA_AS	NO	NO	hpEurope	YES	0.91	19	Entero	60.1282	18.6435	Sweden	Europe	Human	H. pylori	Ubiquitous	Human	Tourrette et al., 2024, 10.1038/s41586-024-07991-z
HEL_BA8964AA_AS	NO	NO	hpEurope	YES	0.9089	19	Entero	6.1	-74.5	Colombia	South_America	Human	H. pylori	Ubiquitous	Human	Tourrette et al., 2024, 10.1038/s41586-024-07991-z
HEL_BA9600AA_AS	NO	NO	hpEurope	YES	0.9008	19	Entero	-23.36	120.78	Australia	Oceania	Human	H. pylori	Ubiquitous	Human	Tourrette et al., 2024, 10.1038/s41586-024-07991-z
HEL_CA5242AA_AS	NO	NO	hpEurope	YES	0.8896	19	Entero	32.4279	53.688	Iran	West_Asia	Human	H. pylori	Ubiquitous	Human	Tourrette et al., 2024, 10.1038/s41586-024-07991-z from Falush
HEL_BA4846AA_AS	NO	NO	hpEurope	YES	0.887	19	Entero	41.5573	2.1095	Spain	Europe	Human	H. pylori	Ubiquitous	Human	Facultat de Farmacia i Ciencies de l'Alimentacio; Universitat de Barcelona
HEL_BA9026AA_AS	NO	NO	hpEurope	YES	0.8861	19	Entero	38	67.3	Uzbekistan	Central_Asia	Human	H. pylori	Ubiquitous	Human	Tourrette et al., 2024, 10.1038/s41586-024-07991-z
HEL_CA5320AA_AS	NO	NO	hpEurope	YES	0.8848	19	Entero	32.4279	53.688	Iran	West_Asia	Human	H. pylori	Ubiquitous	Human	Tourrette et al., 2024, 10.1038/s41586-024-07991-z
GCA_014498445.1	NO	NO	hpEurope	YES	0.8907	19	NCBI	-35.6751	-71.543	Chile	South_America	Human	H. pylori	Ubiquitous	Human	Muñoz-Ramirez et al., 2020, 10.1038/s41396-020-00758-0
GCA_024411915.1	NO	NO	hpEurope	YES	0.8896	19	NCBI	32.4279	53.688	Iran	West_Asia	Human	H. pylori	Ubiquitous	Human	Thorpe et al., 2022, 10.1038/s41467-022-34475-3
HEL_CA5254AA_AS	NO	NO	hpEurope	YES	0.9208	20	Entero	32.4279	53.688	Iran	West_Asia	Human	H. pylori	Ubiquitous	Human	Tourrette et al., 2024, 10.1038/s41586-024-07991-z
HEL_CA5347AA_AS	NO	NO	hpEurope	YES	0.92	20	Entero	32.4279	53.688	Iran	West_Asia	Human	H. pylori	Ubiquitous	Human	Tourrette et al., 2024, 10.1038/s41586-024-07991-z
HEL_CA5234AA_AS	NO	NO	hpEurope	YES	0.9193	20	Entero	32.4279	53.688	Iran	West_Asia	Human	H. pylori	Ubiquitous	Human	Tourrette et al., 2024, 10.1038/s41586-024-07991-z
HEL_CA5534AA_AS	NO	NO	hpEurope	YES	0.9192	20	Entero	32.4279	53.688	Iran	West_Asia	Human	H. pylori	Ubiquitous	Human	Tourrette et al., 2024, 10.1038/s41586-024-07991-z
HEL_CA3670AA_AS	NO	NO	hpEurope	YES	0.9182	20	Entero	15.87	100.993	Thailand	Southeast_Asia	Human	H. pylori	Ubiquitous	Human	Tourrette et al., 2024, 10.1038/s41586-024-07991-z
HEL_BA5602AA_AS	NO	NO	hpEurope	YES	0.9109	20	Entero	4.21048	101.976	Malaysia	Southeast_Asia	Human	H. pylori	Ubiquitous	Human	University of Malaya
HEL_BA9536AA_AS	NO	NO	hpEurope	YES	0.9102	20	Entero	-23.36	120.78	Australia	Oceania	Human	H. pylori	Ubiquitous	Human	Tourrette et al., 2024, 10.1038/s41586-024-07991-z
HEL_BA8223AA_AS	NO	NO	hpEurope	YES	0.91	20	Entero	4.21048	101.976	Malaysia	Southeast_Asia	Human	H. pylori	Ubiquitous	Human	Kumar et al., 2015, 10.1093/nar/gku1271
HEL_CA5796AA_AS	NO	NO	hpEurope	YES	0.9068	20	Entero	32.4279	53.688	Iran	West_Asia	Human	H. pylori	Ubiquitous	Human	Tourrette et al., 2024, 10.1038/s41586-024-07991-z
HEL_CA0039AA_AS	NO	NO	hpEurope	YES	0.898	20	Entero	40.1852	29.1295	Turkey	Europe	Human	H. pylori	Ubiquitous	Human	Akar et al., 2022, 10.1111/hel.12907
HEL_AA6862AA_AS	NO	NO	hpEurope	YES	0.893	20	Entero	31	35	Israel	West_Asia	Human	H. pylori	Ubiquitous	Human	Thorpe et al., 2022, 10.1038/s41467-022-34475-3
HEL_CA5396AA_AS	NO	NO	hpEurope	YES	0.8923	20	Entero	32.4279	53.688	Iran	West_Asia	Human	H. pylori	Ubiquitous	Human	Tourrette et al., 2024, 10.1038/s41586-024-07991-z
HEL_BA4735AA_AS	NO	NO	hpEurope	YES	0.8833	20	Entero	47.3667	8.55	Switzerland	Europe	Human	H. pylori	Ubiquitous	Human	University Hospital Basel
GCA_024406735.1	NO	NO	hpEurope	YES	0.8953	20	NCBI	64.9631	-19.0208	Iceland	Europe	Human	H. pylori	Ubiquitous	Human	Thorpe et al., 2022, 10.1038/s41467-022-34475-3
GCA_014496115.1	NO	NO	hpEurope	YES	0.8842	20	NCBI	39.3999	-8.22445	Portugal	Europe	Human	H. pylori	Ubiquitous	Human	Muñoz-Ramirez et al., 2020, 10.1038/s41396-020-00758-0
GCA_014497885.1	NO	NO	hpEurope	YES	0.884	20	NCBI	6.42375	-66.5897	Venezuela	South_America	Human	H. pylori	Ubiquitous	Human	Muñoz-Ramirez et al., 2020, 10.1038/s41396-020-00758-0
HEL_BA9103AA_AS	NO	NO	hpEurope	YES	0.9234	21	Entero	61.524	105.319	Russia	North_Asia	Human	H. pylori	Ubiquitous	Human	Tourrette et al., 2024, 10.1038/s41586-024-07991-z
HEL_AA6729AA_AS	NO	NO	hpEurope	YES	0.9173	21	Entero	60.1282	18.6435	Sweden	Europe	Human	H. pylori	Ubiquitous	Human	Thorpe et al., 2022, 10.1038/s41467-022-34475-3
HEL_AA8647AA_AS	NO	NO	hpEurope	YES	0.9133	21	Entero	60.1282	18.6435	Sweden	Europe	Human	H. pylori	Ubiquitous	Human	Tourrette et al., 2024, 10.1038/s41586-024-07991-z
HEL_AA8614AA_AS	NO	NO	hpEurope	YES	0.9123	21	Entero	60.1282	18.6435	Sweden	Europe	Human	H. pylori	Ubiquitous	Human	Tourrette et al., 2024, 10.1038/s41586-024-07991-z
HEL_CA0342AA_AS	NO	NO	hpEurope	YES	0.9113	21	Entero	34.13	108.56	China	East_Asia	Human	H. pylori	Ubiquitous	Human	You, Thorell, et al., 2022, 10.1099/mgen.0.000676
HEL_AA6671AA_AS	NO	NO	hpEurope	YES	0.9105	21	Entero	15.7835	-90.2308	Guatemala	North_America	Human	H. pylori	Ubiquitous	Human	Muñoz-Ramirez et al., 2020, 10.1038/s41396-020-00758-0
HEL_BA9549AA_AS	NO	NO	hpEurope	YES	0.9103	21	Entero	61.524	105.319	Russia	North_Asia	Human	H. pylori	Ubiquitous	Human	Tourrette et al., 2024, 10.1038/s41586-024-07991-z
HEL_CA5103AA_AS	NO	NO	hpEurope	YES	0.9036	21	Entero	32.4279	53.688	Iran	West_Asia	Human	H. pylori	Ubiquitous	Human	Tourrette et al., 2024, 10.1038/s41586-024-07991-z
HEL_CA5794AA_AS	NO	NO	hpEurope	YES	0.9016	21	Entero	32.4279	53.688	Iran	West_Asia	Human	H. pylori	Ubiquitous	Human	Tourrette et al., 2024, 10.1038/s41586-024-07991-z
HEL_CA3942AA_AS	NO	NO	hpEurope	YES	0.8992	21	Entero	40.45	-3.25	Spain	Europe	Human	H. pylori	Ubiquitous	Human	Tourrette et al., 2024, 10.1038/s41586-024-07991-z from Falush
HEL_AA6620AA_AS	NO	NO	hpEurope	YES	0.8975	21	Entero	31	35	Israel	West_Asia	Human	H. pylori	Ubiquitous	Human	Thorpe et al., 2022, 10.1038/s41467-022-34475-3
HEL_AA8689AA_AS	NO	NO	hpEurope	YES	0.8967	21	Entero	60.1282	18.6435	Sweden	Europe	Human	H. pylori	Ubiquitous	Human	Tourrette et al., 2024, 10.1038/s41586-024-07991-z
HEL_AA6518AA_AS	NO	NO	hpEurope	YES	0.8941	21	Entero	40.4637	-3.74922	Spain	Europe	Human	H. pylori	Ubiquitous	Human	Muñoz-Ramirez et al., 2020, 10.1038/s41396-020-00758-0
HEL_CA5259AA_AS	NO	NO	hpEurope	YES	0.893	21	Entero	32.4279	53.688	Iran	West_Asia	Human	H. pylori	Ubiquitous	Human	Tourrette et al., 2024, 10.1038/s41586-024-07991-z
HEL_CA5398AA_AS	NO	NO	hpEurope	YES	0.892	21	Entero	32.4279	53.688	Iran	West_Asia	Human	H. pylori	Ubiquitous	Human	Tourrette et al., 2024, 10.1038/s41586-024-07991-z
HEL_BA9763AA_AS	NO	NO	hpEurope	YES	0.8892	21	Entero	52.1326	5.29127	Netherlands	Europe	Human	H. pylori	Ubiquitous	Human	Tourrette et al., 2024, 10.1038/s41586-024-07991-z
HEL_CA5248AA_AS	NO	NO	hpEurope	YES	0.8889	21	Entero	32.4279	53.688	Iran	West_Asia	Human	H. pylori	Ubiquitous	Human	Tourrette et al., 2024, 10.1038/s41586-024-07991-z
HEL_CA3926AA_AS	NO	NO	hpEurope	YES	0.8784	21	Entero	40.45	-3.25	Spain	Europe	Human	H. pylori	Ubiquitous	Human	Tourrette et al., 2024, 10.1038/s41586-024-07991-z from Falush
HEL_AA6857AA_AS	NO	NO	hpEurope	YES	0.878	21	Entero	40.4637	-3.74922	Spain	Europe	Human	H. pylori	Ubiquitous	Human	Muñoz-Ramirez et al., 2020, 10.1038/s41396-020-00758-0
HEL_CA5402AA_AS	NO	NO	hpEurope	YES	0.871	21	Entero	32.4279	53.688	Iran	West_Asia	Human	H. pylori	Ubiquitous	Human	Tourrette et al., 2024, 10.1038/s41586-024-07991-z
GCA_008681395.1	NO	NO	hpEurope	YES	0.9126	21	NCBI	23.6345	-102.553	Mexico	North_America	Human	H. pylori	Ubiquitous	Human	Tourrette et al., 2024, 10.1038/s41586-024-07991-z from NCBI
GCA_008681525.1	NO	NO	hpEurope	YES	0.9082	21	NCBI	23.6345	-102.553	Mexico	North_America	Human	H. pylori	Ubiquitous	Human	Tourrette et al., 2024, 10.1038/s41586-024-07991-z from NCBI
GCA_008681285.1	NO	NO	hpEurope	YES	0.9051	21	NCBI	23.6345	-102.553	Mexico	North_America	Human	H. pylori	Ubiquitous	Human	Tourrette et al., 2024, 10.1038/s41586-024-07991-z from NCBI
GCA_014496565.1	NO	NO	hpEurope	YES	0.8874	21	NCBI	39.3999	-8.22445	Portugal	Europe	Human	H. pylori	Ubiquitous	Human	Muñoz-Ramirez et al., 2020, 10.1038/s41396-020-00758-0
GCA_014497305.1	NO	NO	hpEurope	YES	0.8814	21	NCBI	15.2	-86.2419	Honduras	North_America	Human	H. pylori	Ubiquitous	Human	Muñoz-Ramirez et al., 2020, 10.1038/s41396-020-00758-0
HEL_BA8895AA_AS	NO	NO	hpEurope	YES	0.9282	22	Entero	61.524	105.319	Russia	North_Asia	Human	H. pylori	Ubiquitous	Human	Tourrette et al., 2024, 10.1038/s41586-024-07991-z
HEL_CA5358AA_AS	NO	NO	hpEurope	YES	0.9278	22	Entero	32.4279	53.688	Iran	West_Asia	Human	H. pylori	Ubiquitous	Human	Tourrette et al., 2024, 10.1038/s41586-024-07991-z
HEL_CA5236AA_AS	NO	NO	hpEurope	YES	0.9184	22	Entero	32.4279	53.688	Iran	West_Asia	Human	H. pylori	Ubiquitous	Human	Tourrette et al., 2024, 10.1038/s41586-024-07991-z
HEL_CA5174AA_AS	NO	NO	hpEurope	YES	0.9159	22	Entero	32.4279	53.688	Iran	West_Asia	Human	H. pylori	Ubiquitous	Human	Tourrette et al., 2024, 10.1038/s41586-024-07991-z from Falush
HEL_AA6718AA_AS	NO	NO	hpEurope	YES	0.9137	22	Entero	60.1282	18.6435	Sweden	Europe	Human	H. pylori	Ubiquitous	Human	Thorpe et al., 2022, 10.1038/s41467-022-34475-3
HEL_CA5410AA_AS	NO	NO	hpEurope	YES	0.9133	22	Entero	32.4279	53.688	Iran	West_Asia	Human	H. pylori	Ubiquitous	Human	Tourrette et al., 2024, 10.1038/s41586-024-07991-z
HEL_BA9832AA_AS	NO	NO	hpEurope	YES	0.9088	22	Entero	40.04	70.5	Kyrgyzstan	Central_Asia	Human	H. pylori	Ubiquitous	Human	Tourrette et al., 2024, 10.1038/s41586-024-07991-z
HEL_CA5173AA_AS	NO	NO	hpEurope	YES	0.9082	22	Entero	32.4279	53.688	Iran	West_Asia	Human	H. pylori	Ubiquitous	Human	Tourrette et al., 2024, 10.1038/s41586-024-07991-z
HEL_CA5230AA_AS	NO	NO	hpEurope	YES	0.9068	22	Entero	32.4279	53.688	Iran	West_Asia	Human	H. pylori	Ubiquitous	Human	Tourrette et al., 2024, 10.1038/s41586-024-07991-z
HEL_AA8721AA_AS	NO	NO	hpEurope	YES	0.9067	22	Entero	60.1282	18.6435	Sweden	Europe	Human	H. pylori	Ubiquitous	Human	Tourrette et al., 2024, 10.1038/s41586-024-07991-z
HEL_CA5249AA_AS	NO	NO	hpEurope	YES	0.9027	22	Entero	32.4279	53.688	Iran	West_Asia	Human	H. pylori	Ubiquitous	Human	Tourrette et al., 2024, 10.1038/s41586-024-07991-z
HEL_CA5244AA_AS	NO	NO	hpEurope	YES	0.9	22	Entero	32.4279	53.688	Iran	West_Asia	Human	H. pylori	Ubiquitous	Human	Tourrette et al., 2024, 10.1038/s41586-024-07991-z
HEL_BA9543AA_AS	NO	NO	hpEurope	YES	0.8994	22	Entero	52.1326	5.29127	Netherlands	Europe	Human	H. pylori	Ubiquitous	Human	Tourrette et al., 2024, 10.1038/s41586-024-07991-z
HEL_CA5399AA_AS	NO	NO	hpEurope	YES	0.8989	22	Entero	32.4279	53.688	Iran	West_Asia	Human	H. pylori	Ubiquitous	Human	Tourrette et al., 2024, 10.1038/s41586-024-07991-z
HEL_CA5113AA_AS	NO	NO	hpEurope	YES	0.8977	22	Entero	32.4279	53.688	Iran	West_Asia	Human	H. pylori	Ubiquitous	Human	Tourrette et al., 2024, 10.1038/s41586-024-07991-z
HEL_CA5323AA_AS	NO	NO	hpEurope	YES	0.8975	22	Entero	32.4279	53.688	Iran	West_Asia	Human	H. pylori	Ubiquitous	Human	Tourrette et al., 2024, 10.1038/s41586-024-07991-z
HEL_CA5359AA_AS	NO	NO	hpEurope	YES	0.8955	22	Entero	32.4279	53.688	Iran	West_Asia	Human	H. pylori	Ubiquitous	Human	Tourrette et al., 2024, 10.1038/s41586-024-07991-z
HEL_BA4073AA_AS	NO	NO	hpEurope	YES	0.8953	22	Entero	41.5573	2.1095	Spain	Europe	Human	H. pylori	Ubiquitous	Human	Facultat de Farmacia i Ciencies de l'Alimentacio; Universitat de Barcelona
HEL_AA8700AA_AS	NO	NO	hpEurope	YES	0.8936	22	Entero	12.1494	-86.311	Nicaragua	North_America	Human	H. pylori	Ubiquitous	Human	kaisa.thorell@gmail.com
HEL_BA9242AA_AS	NO	NO	hpEurope	YES	0.8929	22	Entero	61.524	105.319	Russia	North_Asia	Human	H. pylori	Ubiquitous	Human	Tourrette et al., 2024, 10.1038/s41586-024-07991-z
HEL_CA5571AA_AS	NO	NO	hpEurope	YES	0.8894	22	Entero	32.4279	53.688	Iran	West_Asia	Human	H. pylori	Ubiquitous	Human	Tourrette et al., 2024, 10.1038/s41586-024-07991-z
HEL_AA8734AA_AS	NO	NO	hpEurope	YES	0.8862	22	Entero	60.1282	18.6435	Sweden	Europe	Human	H. pylori	Ubiquitous	Human	Tourrette et al., 2024, 10.1038/s41586-024-07991-z
HEL_BA8979AA_AS	NO	NO	hpEurope	YES	0.8852	22	Entero	-23.36	120.78	Australia	Oceania	Human	H. pylori	Ubiquitous	Human	Tourrette et al., 2024, 10.1038/s41586-024-07991-z
HEL_CA5412AA_AS	NO	NO	hpEurope	YES	0.8828	22	Entero	32.4279	53.688	Iran	West_Asia	Human	H. pylori	Ubiquitous	Human	Tourrette et al., 2024, 10.1038/s41586-024-07991-z
HEL_CA5330AA_AS	NO	NO	hpEurope	YES	0.8828	22	Entero	32.4279	53.688	Iran	West_Asia	Human	H. pylori	Ubiquitous	Human	Tourrette et al., 2024, 10.1038/s41586-024-07991-z
HEL_BA5598AA_AS	NO	NO	hpEurope	YES	0.8807	22	Entero	4.21048	101.976	Malaysia	Southeast_Asia	Human	H. pylori	Ubiquitous	Human	University of Malaya
GCA_024412915.1	NO	NO	hpEurope	YES	0.92	22	NCBI	64.9631	-19.0208	Iceland	Europe	Human	H. pylori	Ubiquitous	Human	Thorpe et al., 2022, 10.1038/s41467-022-34475-3
GCA_024411815.1	NO	NO	hpEurope	YES	0.9159	22	NCBI	32.4279	53.688	Iran	West_Asia	Human	H. pylori	Ubiquitous	Human	Thorpe et al., 2022, 10.1038/s41467-022-34475-3
GCA_011141045.1	NO	NO	hpEurope	YES	0.9102	22	NCBI	23.6345	-102.553	Mexico	North_America	Human	H. pylori	Ubiquitous	Human	Camorlinga-Ponce et al., 2021, 10.3389/fcimb.2020.539115
GCA_014498305.1	NO	NO	hpEurope	YES	0.8969	22	NCBI	40.4637	-3.74922	Spain	Europe	Human	H. pylori	Ubiquitous	Human	Muñoz-Ramirez et al., 2020, 10.1038/s41396-020-00758-0
GCA_014498275.1	NO	NO	hpEurope	YES	0.8918	22	NCBI	40.4637	-3.74922	Spain	Europe	Human	H. pylori	Ubiquitous	Human	Muñoz-Ramirez et al., 2020, 10.1038/s41396-020-00758-0
HEL_CA5275AA_AS	NO	NO	hpEurope	YES	0.9284	23	Entero	32.4279	53.688	Iran	West_Asia	Human	H. pylori	Ubiquitous	Human	Tourrette et al., 2024, 10.1038/s41586-024-07991-z
HEL_CA5326AA_AS	NO	NO	hpEurope	YES	0.9247	23	Entero	32.4279	53.688	Iran	West_Asia	Human	H. pylori	Ubiquitous	Human	Tourrette et al., 2024, 10.1038/s41586-024-07991-z
HEL_CA5444AA_AS	NO	NO	hpEurope	YES	0.9229	23	Entero	32.4279	53.688	Iran	West_Asia	Human	H. pylori	Ubiquitous	Human	Tourrette et al., 2024, 10.1038/s41586-024-07991-z
HEL_CA5429AA_AS	NO	NO	hpEurope	YES	0.9229	23	Entero	32.4279	53.688	Iran	West_Asia	Human	H. pylori	Ubiquitous	Human	Tourrette et al., 2024, 10.1038/s41586-024-07991-z
HEL_AA6674AA_AS	NO	NO	hpEurope	YES	0.9227	23	Entero	60.1282	18.6435	Sweden	Europe	Human	H. pylori	Ubiquitous	Human	Thorpe et al., 2022, 10.1038/s41467-022-34475-3
HEL_CA5156AA_AS	NO	NO	hpEurope	YES	0.9213	23	Entero	32.4279	53.688	Iran	West_Asia	Human	H. pylori	Ubiquitous	Human	Tourrette et al., 2024, 10.1038/s41586-024-07991-z from Falush
HEL_CA5338AA_AS	NO	NO	hpEurope	YES	0.9209	23	Entero	32.4279	53.688	Iran	West_Asia	Human	H. pylori	Ubiquitous	Human	Tourrette et al., 2024, 10.1038/s41586-024-07991-z
HEL_BA8972AA_AS	NO	NO	hpEurope	YES	0.9191	23	Entero	61.13	-149.54	United_States	North_America	Human	H. pylori	Ubiquitous	Human	Tourrette et al., 2024, 10.1038/s41586-024-07991-z
HEL_CA5155AA_AS	NO	NO	hpEurope	YES	0.9179	23	Entero	32.4279	53.688	Iran	West_Asia	Human	H. pylori	Ubiquitous	Human	Tourrette et al., 2024, 10.1038/s41586-024-07991-z
HEL_CA5423AA_AS	NO	NO	hpEurope	YES	0.9168	23	Entero	32.4279	53.688	Iran	West_Asia	Human	H. pylori	Ubiquitous	Human	Tourrette et al., 2024, 10.1038/s41586-024-07991-z
HEL_CA5329AA_AS	NO	NO	hpEurope	YES	0.9103	23	Entero	32.4279	53.688	Iran	West_Asia	Human	H. pylori	Ubiquitous	Human	Tourrette et al., 2024, 10.1038/s41586-024-07991-z
HEL_AA6536AA_AS	NO	NO	hpEurope	YES	0.9038	23	Entero	31	35	Israel	West_Asia	Human	H. pylori	Ubiquitous	Human	Thorpe et al., 2022, 10.1038/s41467-022-34475-3
HEL_BA9500AA_AS	NO	NO	hpEurope	YES	0.9024	23	Entero	52.97	-1.17	United_Kingdom	Europe	Human	H. pylori	Ubiquitous	Human	Tourrette et al., 2024, 10.1038/s41586-024-07991-z
HEL_BA9493AA_AS	NO	NO	hpEurope	YES	0.901	23	Entero	41.3775	64.5853	Uzbekistan	Central_Asia	Human	H. pylori	Ubiquitous	Human	Tourrette et al., 2024, 10.1038/s41586-024-07991-z
HEL_CA5366AA_AS	NO	NO	hpEurope	YES	0.8918	23	Entero	32.4279	53.688	Iran	West_Asia	Human	H. pylori	Ubiquitous	Human	Tourrette et al., 2024, 10.1038/s41586-024-07991-z
HEL_CA5238AA_AS	NO	NO	hpEurope	YES	0.8905	23	Entero	32.4279	53.688	Iran	West_Asia	Human	H. pylori	Ubiquitous	Human	Tourrette et al., 2024, 10.1038/s41586-024-07991-z
HEL_AA6711AA_AS	NO	NO	hpEurope	YES	0.89	23	Entero	39.3999	-8.22445	Portugal	Europe	Human	H. pylori	Ubiquitous	Human	Muñoz-Ramirez et al., 2020, 10.1038/s41396-020-00758-0
HEL_CA4276AA_AS	NO	NO	hpEurope	YES	0.8875	23	Entero	15.2	-86.2419	Honduras	North_America	Human	H. pylori	Ubiquitous	Human	Tourrette et al., 2024, 10.1038/s41586-024-07991-z from Falush
HEL_AA6498AA_AS	NO	NO	hpEurope	YES	0.8873	23	Entero	39.3999	-8.22445	Portugal	Europe	Human	H. pylori	Ubiquitous	Human	Thorpe et al., 2022, 10.1038/s41467-022-34475-3
HEL_AA6860AA_AS	NO	NO	hpEurope	YES	0.8842	23	Entero	31.0461	34.8516	Israel	West_Asia	Human	H. pylori	Ubiquitous	Human	Tourrette et al., 2024, 10.1038/s41586-024-07991-z
HEL_CA5353AA_AS	NO	NO	hpEurope	YES	0.8827	23	Entero	32.4279	53.688	Iran	West_Asia	Human	H. pylori	Ubiquitous	Human	Tourrette et al., 2024, 10.1038/s41586-024-07991-z
HEL_BA4089AA_AS	NO	NO	hpEurope	YES	0.8815	23	Entero	41.5573	2.1095	Spain	Europe	Human	H. pylori	Ubiquitous	Human	Facultat de Farmacia i Ciencies de l'Alimentacio; Universitat de Barcelona
GCA_024411895.1	NO	NO	hpEurope	YES	0.9213	23	NCBI	32.4279	53.688	Iran	West_Asia	Human	H. pylori	Ubiquitous	Human	Thorpe et al., 2022, 10.1038/s41467-022-34475-3
GCA_016806465.1	NO	NO	hpEurope	YES	0.9116	23	NCBI	4.57087	-74.2973	Colombia	South_America	Human	H. pylori	Ubiquitous	Human	Muñoz et al., 2021, 10.1111/hel.12779
GCA_003815515.1	NO	NO	hpEurope	YES	0.908	23	NCBI	4.57087	-74.2973	Colombia	South_America	Human	H. pylori	Ubiquitous	Human	Tourrette et al., 2024, 10.1038/s41586-024-07991-z from NCBI
GCA_014496235.1	NO	NO	hpEurope	YES	0.8893	23	NCBI	39.3999	-8.22445	Portugal	Europe	Human	H. pylori	Ubiquitous	Human	Muñoz-Ramirez et al., 2020, 10.1038/s41396-020-00758-0
HEL_CA3791AA_AS	NO	NO	hpEurope	YES	0.9235	24	Entero	15.87	100.993	Thailand	Southeast_Asia	Human	H. pylori	Ubiquitous	Human	Tourrette et al., 2024, 10.1038/s41586-024-07991-z
HEL_CA5331AA_AS	NO	NO	hpEurope	YES	0.9206	24	Entero	32.4279	53.688	Iran	West_Asia	Human	H. pylori	Ubiquitous	Human	Tourrette et al., 2024, 10.1038/s41586-024-07991-z
HEL_CA5539AA_AS	NO	NO	hpEurope	YES	0.9191	24	Entero	31.0461	34.8516	Israel	West_Asia	Human	H. pylori	Ubiquitous	Human	Tourrette et al., 2024, 10.1038/s41586-024-07991-z from Falush
HEL_CA5379AA_AS	NO	NO	hpEurope	YES	0.9174	24	Entero	32.4279	53.688	Iran	West_Asia	Human	H. pylori	Ubiquitous	Human	Tourrette et al., 2024, 10.1038/s41586-024-07991-z
HEL_AA8656AA_AS	NO	NO	hpEurope	YES	0.9146	24	Entero	60.1282	18.6435	Sweden	Europe	Human	H. pylori	Ubiquitous	Human	Tourrette et al., 2024, 10.1038/s41586-024-07991-z
HEL_CA5543AA_AS	NO	NO	hpEurope	YES	0.9133	24	Entero	32.4279	53.688	Iran	West_Asia	Human	H. pylori	Ubiquitous	Human	Tourrette et al., 2024, 10.1038/s41586-024-07991-z
HEL_CA5433AA_AS	NO	NO	hpEurope	YES	0.9081	24	Entero	32.4279	53.688	Iran	West_Asia	Human	H. pylori	Ubiquitous	Human	Tourrette et al., 2024, 10.1038/s41586-024-07991-z
HEL_BA9744AA_AS	NO	NO	hpEurope	YES	0.9033	24	Entero	52.1326	5.29127	Netherlands	Europe	Human	H. pylori	Ubiquitous	Human	Tourrette et al., 2024, 10.1038/s41586-024-07991-z
HEL_AA6555AA_AS	NO	NO	hpEurope	YES	0.9015	24	Entero	40.4637	-3.74922	Spain	Europe	Human	H. pylori	Ubiquitous	Human	Muñoz-Ramirez et al., 2020, 10.1038/s41396-020-00758-0
HEL_BA9743AA_AS	NO	NO	hpEurope	YES	0.9014	24	Entero	30.53	-91.15	United_States	North_America	Human	H. pylori	Ubiquitous	Human	Tourrette et al., 2024, 10.1038/s41586-024-07991-z
HEL_BA9226AA_AS	NO	NO	hpEurope	YES	0.8967	24	Entero	-23.36	120.78	Australia	Oceania	Human	H. pylori	Ubiquitous	Human	Tourrette et al., 2024, 10.1038/s41586-024-07991-z
HEL_BA8931AA_AS	NO	NO	hpEurope	YES	0.8951	24	Entero	61.524	105.319	Russia	North_Asia	Human	H. pylori	Ubiquitous	Human	Tourrette et al., 2024, 10.1038/s41586-024-07991-z
HEL_AA6669AA_AS	NO	NO	hpEurope	YES	0.8927	24	Entero	39.3999	-8.22445	Portugal	Europe	Human	H. pylori	Ubiquitous	Human	Thorpe et al., 2022, 10.1038/s41467-022-34475-3
HEL_BA9141AA_AS	NO	NO	hpEurope	YES	0.8922	24	Entero	43	2.45	Spain	Europe	Human	H. pylori	Ubiquitous	Human	Tourrette et al., 2024, 10.1038/s41586-024-07991-z
HEL_BA9458AA_AS	NO	NO	hpEurope	YES	0.8918	24	Entero	51.44	94.26	Russia	North_Asia	Human	H. pylori	Ubiquitous	Human	Tourrette et al., 2024, 10.1038/s41586-024-07991-z
HEL_BA9475AA_AS	NO	NO	hpEurope	YES	0.8911	24	Entero	-31.6	115.5	Australia	Oceania	Human	H. pylori	Ubiquitous	Human	Tourrette et al., 2024, 10.1038/s41586-024-07991-z
HEL_AA6865AA_AS	NO	NO	hpEurope	YES	0.8876	24	Entero	15.2	-86.2419	Honduras	North_America	Human	H. pylori	Ubiquitous	Human	Muñoz-Ramirez et al., 2020, 10.1038/s41396-020-00758-0
HEL_BA4834AA_AS	NO	NO	hpEurope	YES	0.88	24	Entero	41.5573	2.1095	Spain	Europe	Human	H. pylori	Ubiquitous	Human	Facultat de Farmacia i Ciencies de l'Alimentacio; Universitat de Barcelona
GCA_014498045.1	NO	NO	hpEurope	YES	0.9098	24	NCBI	15.7835	-90.2308	Guatemala	North_America	Human	H. pylori	Ubiquitous	Human	Muñoz-Ramirez et al., 2020, 10.1038/s41396-020-00758-0
GCA_014497285.1	NO	NO	hpEurope	YES	0.8871	24	NCBI	40.4637	-3.74922	Spain	Europe	Human	H. pylori	Ubiquitous	Human	Muñoz-Ramirez et al., 2020, 10.1038/s41396-020-00758-0
GCA_014498845.1	NO	NO	hpEurope	YES	0.8861	24	NCBI	-14.235	-51.9253	Brazil	South_America	Human	H. pylori	Ubiquitous	Human	Muñoz-Ramirez et al., 2020, 10.1038/s41396-020-00758-0
HEL_AA6579AA_AS	NO	NO	hpEurope	YES	0.9302	25	Entero	39.3999	-8.22445	Portugal	Europe	Human	H. pylori	Ubiquitous	Human	Thorpe et al., 2022, 10.1038/s41467-022-34475-3
HEL_BA8836AA_AS	NO	NO	hpEurope	YES	0.924	25	Entero	61.524	105.319	Russia	North_Asia	Human	H. pylori	Ubiquitous	Human	Tourrette et al., 2024, 10.1038/s41586-024-07991-z
HEL_BA9048AA_AS	NO	NO	hpEurope	YES	0.9227	25	Entero	-23.36	120.78	Australia	Oceania	Human	H. pylori	Ubiquitous	Human	Tourrette et al., 2024, 10.1038/s41586-024-07991-z
HEL_CA5264AA_AS	NO	NO	hpEurope	YES	0.9218	25	Entero	32.4279	53.688	Iran	West_Asia	Human	H. pylori	Ubiquitous	Human	Tourrette et al., 2024, 10.1038/s41586-024-07991-z
HEL_CA5252AA_AS	NO	NO	hpEurope	YES	0.9151	25	Entero	32.4279	53.688	Iran	West_Asia	Human	H. pylori	Ubiquitous	Human	Tourrette et al., 2024, 10.1038/s41586-024-07991-z
HEL_BA9416AA_AS	NO	NO	hpEurope	YES	0.9151	25	Entero	61.524	105.319	Russia	North_Asia	Human	H. pylori	Ubiquitous	Human	Tourrette et al., 2024, 10.1038/s41586-024-07991-z
HEL_CA5340AA_AS	NO	NO	hpEurope	YES	0.9148	25	Entero	32.4279	53.688	Iran	West_Asia	Human	H. pylori	Ubiquitous	Human	Tourrette et al., 2024, 10.1038/s41586-024-07991-z
HEL_CA5553AA_AS	NO	NO	hpEurope	YES	0.9122	25	Entero	32.4279	53.688	Iran	West_Asia	Human	H. pylori	Ubiquitous	Human	Tourrette et al., 2024, 10.1038/s41586-024-07991-z
HEL_CA5153AA_AS	NO	NO	hpEurope	YES	0.9121	25	Entero	32.4279	53.688	Iran	West_Asia	Human	H. pylori	Ubiquitous	Human	Tourrette et al., 2024, 10.1038/s41586-024-07991-z
HEL_AA1850AA_AS	NO	NO	hpEurope	YES	0.9074	25	Entero	46.2276	2.21375	France	Europe	Human	H. pylori	Ubiquitous	Human	Vale et al., 2017, 10.1038/srep42471
HEL_BA4698AA_AS	NO	NO	hpEurope	YES	0.9052	25	Entero	47.3667	8.55	Switzerland	Europe	Human	H. pylori	Ubiquitous	Human	University Hospital Basel
HEL_CA5106AA_AS	NO	NO	hpEurope	YES	0.9031	25	Entero	32.4279	53.688	Iran	West_Asia	Human	H. pylori	Ubiquitous	Human	Tourrette et al., 2024, 10.1038/s41586-024-07991-z
HEL_CA5373AA_AS	NO	NO	hpEurope	YES	0.8997	25	Entero	32.4279	53.688	Iran	West_Asia	Human	H. pylori	Ubiquitous	Human	Tourrette et al., 2024, 10.1038/s41586-024-07991-z
HEL_BA9550AA_AS	NO	NO	hpEurope	YES	0.8995	25	Entero	36.11	-86.68	United_States	North_America	Human	H. pylori	Ubiquitous	Human	Tourrette et al., 2024, 10.1038/s41586-024-07991-z
HEL_AA8660AA_AS	NO	NO	hpEurope	YES	0.8972	25	Entero	60.1282	18.6435	Sweden	Europe	Human	H. pylori	Ubiquitous	Human	Tourrette et al., 2024, 10.1038/s41586-024-07991-z
HEL_BA9786AA_AS	NO	NO	hpEurope	YES	0.8944	25	Entero	38.7946	-106.535	United_States	North_America	Human	H. pylori	Ubiquitous	Human	Tourrette et al., 2024, 10.1038/s41586-024-07991-z
HEL_BA8995AA_AS	NO	NO	hpEurope	YES	0.8909	25	Entero	61.524	105.319	Russia	North_Asia	Human	H. pylori	Ubiquitous	Human	Tourrette et al., 2024, 10.1038/s41586-024-07991-z
HEL_BA3946AA_AS	NO	NO	hpEurope	YES	0.8871	25	Entero	47.3667	8.55	Switzerland	Europe	Human	H. pylori	Ubiquitous	Human	University Hospital Basel
HEL_BA8899AA_AS	NO	NO	hpEurope	YES	0.8863	25	Entero	-23.36	120.78	Australia	Oceania	Human	H. pylori	Ubiquitous	Human	Tourrette et al., 2024, 10.1038/s41586-024-07991-z
HEL_CA5357AA_AS	NO	NO	hpEurope	YES	0.8859	25	Entero	32.4279	53.688	Iran	West_Asia	Human	H. pylori	Ubiquitous	Human	Tourrette et al., 2024, 10.1038/s41586-024-07991-z
GCA_013429335.1	NO	NO	hpEurope	YES	0.9068	25	NCBI	22	114	China	East_Asia	Human	H. pylori	Ubiquitous	Human	Zhang et al., 2020, 10.1093/jac/dkaa302
GCA_014497985.1	NO	NO	hpEurope	YES	0.9134	25	NCBI	6.42375	-66.5897	Venezuela	South_America	Human	H. pylori	Ubiquitous	Human	Muñoz-Ramirez et al., 2020, 10.1038/s41396-020-00758-0
GCA_014498205.1	NO	NO	hpEurope	YES	0.9017	25	NCBI	40.4637	-3.74922	Spain	Europe	Human	H. pylori	Ubiquitous	Human	Muñoz-Ramirez et al., 2020, 10.1038/s41396-020-00758-0
HEL_CA5250AA_AS	NO	NO	hpEurope	YES	0.931	26	Entero	32.4279	53.688	Iran	West_Asia	Human	H. pylori	Ubiquitous	Human	Tourrette et al., 2024, 10.1038/s41586-024-07991-z
HEL_BA0156AA_AS	NO	NO	hpEurope	YES	0.9259	26	Entero	31.0461	34.8516	Israel	West_Asia	Human	H. pylori	Ubiquitous	Human	Tourrette et al., 2024, 10.1038/s41586-024-07991-z
HEL_AA8739AA_AS	NO	NO	hpEurope	YES	0.9237	26	Entero	60.1282	18.6435	Sweden	Europe	Human	H. pylori	Ubiquitous	Human	Tourrette et al., 2024, 10.1038/s41586-024-07991-z
HEL_CA3805AA_AS	NO	NO	hpEurope	YES	0.9219	26	Entero	19.4978	-99.1269	Mexico	North_America	Human	H. pylori	Ubiquitous	Human	Tourrette et al., 2024, 10.1038/s41586-024-07991-z from Falush
HEL_CA5241AA_AS	NO	NO	hpEurope	YES	0.9193	26	Entero	32.4279	53.688	Iran	West_Asia	Human	H. pylori	Ubiquitous	Human	Tourrette et al., 2024, 10.1038/s41586-024-07991-z
HEL_AA8724AA_AS	NO	NO	hpEurope	YES	0.9169	26	Entero	60.1282	18.6435	Sweden	Europe	Human	H. pylori	Ubiquitous	Human	Tourrette et al., 2024, 10.1038/s41586-024-07991-z
HEL_BA9574AA_AS	NO	NO	hpEurope	YES	0.915	26	Entero	43	2.45	Spain	Europe	Human	H. pylori	Ubiquitous	Human	Tourrette et al., 2024, 10.1038/s41586-024-07991-z
HEL_CA5369AA_AS	NO	NO	hpEurope	YES	0.9128	26	Entero	32.4279	53.688	Iran	West_Asia	Human	H. pylori	Ubiquitous	Human	Tourrette et al., 2024, 10.1038/s41586-024-07991-z
HEL_BA8981AA_AS	NO	NO	hpEurope	YES	0.9112	26	Entero	6.1	-74.5	Colombia	South_America	Human	H. pylori	Ubiquitous	Human	Tourrette et al., 2024, 10.1038/s41586-024-07991-z
HEL_CA5274AA_AS	NO	NO	hpEurope	YES	0.9107	26	Entero	32.4279	53.688	Iran	West_Asia	Human	H. pylori	Ubiquitous	Human	Tourrette et al., 2024, 10.1038/s41586-024-07991-z
HEL_BA4162AA_AS	NO	NO	hpEurope	YES	0.9088	26	Entero	-25.2744	133.775	Australia	Oceania	Human	H. pylori	Ubiquitous	Human	Chua et al., 2019, 10.1093/gastro/goy048
HEL_AA6702AA_AS	NO	NO	hpEurope	YES	0.908	26	Entero	-38.4161	-63.6167	Argentina	South_America	Human	H. pylori	Ubiquitous	Human	Muñoz-Ramirez et al., 2020, 10.1038/s41396-020-00758-0
HEL_CA6717AA_AS	NO	NO	hpEurope	YES	0.9079	26	Entero	14.0583	108.277	Vietnam	Southeast_Asia	Human	H. pylori	Ubiquitous	Human	Tourrette et al., 2024, 10.1038/s41586-024-07991-z
HEL_CA5583AA_AS	NO	NO	hpEurope	YES	0.9061	26	Entero	32.4279	53.688	Iran	West_Asia	Human	H. pylori	Ubiquitous	Human	Tourrette et al., 2024, 10.1038/s41586-024-07991-z
HEL_BA9136AA_AS	NO	NO	hpEurope	YES	0.9058	26	Entero	-0.85	-71.41	Colombia	South_America	Human	H. pylori	Ubiquitous	Human	Tourrette et al., 2024, 10.1038/s41586-024-07991-z
HEL_AA6771AA_AS	NO	NO	hpEurope	YES	0.9047	26	Entero	-38.4161	-63.6167	Argentina	South_America	Human	H. pylori	Ubiquitous	Human	Muñoz-Ramirez et al., 2020, 10.1038/s41396-020-00758-0
HEL_CA5123AA_AS	NO	NO	hpEurope	YES	0.9025	26	Entero	32.4279	53.688	Iran	West_Asia	Human	H. pylori	Ubiquitous	Human	Tourrette et al., 2024, 10.1038/s41586-024-07991-z
HEL_BA9215AA_AS	NO	NO	hpEurope	YES	0.898	26	Entero	-23.36	120.78	Australia	Oceania	Human	H. pylori	Ubiquitous	Human	Tourrette et al., 2024, 10.1038/s41586-024-07991-z
HEL_AA8727AA_AS	NO	NO	hpEurope	YES	0.8952	26	Entero	60.1282	18.6435	Sweden	Europe	Human	H. pylori	Ubiquitous	Human	Tourrette et al., 2024, 10.1038/s41586-024-07991-z
HEL_CA5151AA_AS	NO	NO	hpEurope	YES	0.8944	26	Entero	32.4279	53.688	Iran	West_Asia	Human	H. pylori	Ubiquitous	Human	Tourrette et al., 2024, 10.1038/s41586-024-07991-z
HEL_BA8650AA_AS	NO	NO	hpEurope	YES	0.8887	26	Entero	-25.2744	133.775	Australia	Oceania	Human	H. pylori	Ubiquitous	Human	Monash University
HEL_BA9338AA_AS	NO	NO	hpEurope	YES	0.8886	26	Entero	-23.36	120.78	Australia	Oceania	Human	H. pylori	Ubiquitous	Human	Tourrette et al., 2024, 10.1038/s41586-024-07991-z
HEL_BA8946AA_AS	NO	NO	hpEurope	YES	0.8876	26	Entero	-30.5595	22.9375	South_Africa	Africa	Human	H. pylori	Ubiquitous	Human	Tourrette et al., 2024, 10.1038/s41586-024-07991-z
HEL_BA7768AA_AS	NO	NO	hpEurope	YES	0.8801	26	Entero	20.5937	78.9629	India	South_Asia	Human	H. pylori	Ubiquitous	Human	Shetty et al., 2019, 10.1186/s13099-019-0305-x
HEL_BA8881AA_AS	NO	NO	hpEurope	YES	0.8778	26	Entero	61.524	105.319	Russia	North_Asia	Human	H. pylori	Ubiquitous	Human	Tourrette et al., 2024, 10.1038/s41586-024-07991-z
HEL_BA9275AA_AS	NO	NO	hpEurope	YES	0.8768	26	Entero	-31.6	115.5	Australia	Oceania	Human	H. pylori	Ubiquitous	Human	Tourrette et al., 2024, 10.1038/s41586-024-07991-z
GCA_014497725.1	NO	NO	hpEurope	YES	0.9048	26	NCBI	-38.4161	-63.6167	Argentina	South_America	Human	H. pylori	Ubiquitous	Human	Muñoz-Ramirez et al., 2020, 10.1038/s41396-020-00758-0
GCA_024406665.1	NO	NO	hpEurope	YES	0.9043	26	NCBI	64.9631	-19.0208	Iceland	Europe	Human	H. pylori	Ubiquitous	Human	Thorpe et al., 2022, 10.1038/s41467-022-34475-3
GCA_014497335.1	NO	NO	hpEurope	YES	0.8988	26	NCBI	40.4637	-3.74922	Spain	Europe	Human	H. pylori	Ubiquitous	Human	Muñoz-Ramirez et al., 2020, 10.1038/s41396-020-00758-0
[truncated: 5,546 more rows]

## Sheet: Extended Data Table 2
Extended Data Table 2| This table presents two linear regression models of genetic variation (captured by PC1, PC2 and PC3, respectively) as functions of Latitude, Longitude, and Elevation.
PC1 ~ Latitude + Longitude + Altitude
	coef	std err	t	P>|t|	[0.025	0.975]
Latitude	0.1405	0.013	11.194	0	0.116	0.165
Longitude	-0.0682	0.014	-4.858	0	-0.096	-0.041
Altitude	0.5027	0.012	41.218	0	0.479	0.527
PC2 ~ Latitude + Longitude + Altitude
	coef	std err	t	P>|t|	[0.025	0.975]
Latitude	0.1776	0.024	7.307	0	0.13	0.225
Longitude	-0.0264	0.027	-0.968	0.333	-0.08	0.027
Altitude	0.0257	0.024	1.085	0.278	-0.021	0.072
PC3 ~ Latitude + Longitude + Altitude
	coef	std err	t	P>|t|	[0.025	0.975]
Latitude	0.1776	0.024	7.307	0	0.13	0.225
Longitude	-0.0264	0.027	-0.968	0.333	-0.08	0.027
Altitude	0.0257	0.024	1.085	0.278	-0.021	0.072

## Sheet: Extended Data Table 3
Extended Data Table 3| ADMIXTURE cross‐validation errors for K values from 10 to 25.
K of ADMIXTURE	CV Error
10	0.10008
11	0.10023
12	0.09946
13	0.09946
14	0.10123
15	0.10073
16	0.10007
17	0.0999
18	0.10154
19	0.1019
20	0.10142
21	0.1031
22	0.10319
23	0.10141
24	0.1025
25	0.1014

## Sheet: Extended Data Table 4
Extended Data Table 4| GWAS and FST analysis results under various grouping schemes, showing loci surpassing the significance threshold and their corresponding annotations.
Elevation				Latitude				Solar radiation				Temperature				Temperature				Environmental PC1				Environmental PC2
Condition	Number_of_sites			Condition	Number_of_sites			Condition	Number_of_sites			Condition	Number_of_sites			Condition	Number_of_sites			Condition	Number_of_sites			Condition	Number_of_sites
-Log10(P-value) > 5	60			-Log10(P-value) > 5	65			-Log10(P-value) > 5	19			-Log10(P-value) > 5	19			-Log10(P-value) > 5	13			-Log10(P-value) > 5	12			-Log10(P-value) > 5	12
Fst > 0.6	256			Fst > 0.6	11			Fst > 0.6	94			Fst > 0.6	285			Fst > 0.6	200			Fst > 0.6	194			Fst > 0.6	361
-Log10(P-value) > 5 and Fst > 0.6	3			-Log10(P-value) > 5 and Fst > 0.6	0			-Log10(P-value) > 5 and Fst > 0.6	0			-Log10(P-value) > 5 and Fst > 0.6	0			-Log10(P-value) > 5 and Fst > 0.6	0			-Log10(P-value) > 5 and Fst > 0.6	0			-Log10(P-value) > 5 and Fst > 0.6	0
Condition	Annotation	SNPs count		Condition	Annotation	SNPs count		Condition	Annotation	SNPs count		Condition	Annotation	SNPs count		Condition	Annotation	SNPs count		Condition	Annotation	SNPs count		Condition	Annotation	SNPs count
-Log10(P-value) > 5	ID=NC_000915_00416;Name=HP0410;gene=HP0410;inference=ab initio prediction:Prodigal:002006,similar to AA sequence:Hp26695_curated_for_HpGP.faa:AAD07478.1;locus_tag=NC_000915_00416;product=Putative neuraminyllactose-binding hemagglutinin-like protein	13		-Log10(P-value) > 5	ID=NC_000915_01287;Name=HP1256;gene=HP1256;inference=ab initio prediction:Prodigal:002006,similar to AA sequence:Hp26695_curated_for_HpGP.faa:AAD08302.1;locus_tag=NC_000915_01287;product=Ribosome recycling factor	3		-Log10(P-value) > 5	ID=NC_000915_00501;Name=HP0486;gene=HP0486;inference=ab initio prediction:Prodigal:002006,similar to AA sequence:Hp26695_curated_for_HpGP.faa:AAD07554.1;locus_tag=NC_000915_00501;product=Outer membrane protein HofC	8		-Log10(P-value) > 5	ID=NC_000915_00257;Name=HP0252;gene=HP0252;inference=ab initio prediction:Prodigal:002006,similar to AA sequence:Hp26695_curated_for_HpGP.faa:AAD07319.1;locus_tag=NC_000915_00257;product=Outer membrane protein HopF	3		-Log10(P-value) > 5	ID=NC_000915_00501;Name=HP0486;gene=HP0486;inference=ab initio prediction:Prodigal:002006,similar to AA sequence:Hp26695_curated_for_HpGP.faa:AAD07554.1;locus_tag=NC_000915_00501;product=Outer membrane protein HofC	2		-Log10(P-value) > 5	ID=NC_000915_00092;Name=HP0089;gene=HP0089;inference=ab initio prediction:Prodigal:002006,similar to AA sequence:Hp26695_curated_for_HpGP.faa:AAD07157.1;locus_tag=NC_000915_00092;product=5'-methylthioadenosine/S-adenosylhomocysteine nucleosidase	1		-Log10(P-value) > 5	ID=NC_000915_01541;Name=HP1512;gene=HP1512;inference=ab initio prediction:Prodigal:002006,similar to AA sequence:Hp26695_curated_for_HpGP.faa:AAD08553.1;locus_tag=NC_000915_01541;product=Iron-regulated outer membrane protein FrpB4	2
-Log10(P-value) > 5	ID=NC_000915_00734;Name=HP0718;gene=HP0718;inference=ab initio prediction:Prodigal:002006,similar to AA sequence:Hp26695_curated_for_HpGP.faa:AAD07771.1;locus_tag=NC_000915_00734;product=L-Lysine Exporter LysE	7		-Log10(P-value) > 5	ID=NC_000915_00551;Name=HP0537;gene=HP0537;inference=ab initio prediction:Prodigal:002006,similar to AA sequence:Hp26695_curated_for_HpGP.faa:AAD07603.1;locus_tag=NC_000915_00551;product=Cag pathogenicity island protein CagM	2		-Log10(P-value) > 5	ID=NC_000915_01541;Name=HP1512;gene=HP1512;inference=ab initio prediction:Prodigal:002006,similar to AA sequence:Hp26695_curated_for_HpGP.faa:AAD08553.1;locus_tag=NC_000915_01541;product=Iron-regulated outer membrane protein FrpB4	6		-Log10(P-value) > 5	ID=NC_000915_00501;Name=HP0486;gene=HP0486;inference=ab initio prediction:Prodigal:002006,similar to AA sequence:Hp26695_curated_for_HpGP.faa:AAD07554.1;locus_tag=NC_000915_00501;product=Outer membrane protein HofC	3		-Log10(P-value) > 5	ID=NC_000915_00932;Name=HP0912;gene=HP0912;inference=ab initio prediction:Prodigal:002006,similar to AA sequence:Hp26695_curated_for_HpGP.faa:AAD07960.1;locus_tag=NC_000915_00932;product=Outer membrane protein AlpA/HopC	2		-Log10(P-value) > 5	ID=NC_000915_00250;Name=HP0246;gene=HP0246;inference=ab initio prediction:Prodigal:002006,similar to AA sequence:Hp26695_curated_for_HpGP.faa:AAD07314.1;locus_tag=NC_000915_00250;product=Flagellar basal body P-ring protein FlgI	1		-Log10(P-value) > 5	ID=NC_000915_00307;Name=HP0303;gene=HP0303;inference=ab initio prediction:Prodigal:002006,similar to AA sequence:Hp26695_curated_for_HpGP.faa:AAD07372.1;locus_tag=NC_000915_00307;product=GTP-binding protein ObgE	2
-Log10(P-value) > 5	ID=NC_000915_00932;Name=HP0912;gene=HP0912;inference=ab initio prediction:Prodigal:002006,similar to AA sequence:Hp26695_curated_for_HpGP.faa:AAD07960.1;locus_tag=NC_000915_00932;product=Outer membrane protein AlpA/HopC	4		-Log10(P-value) > 5	ID=NC_000915_00691;Name=HP0673;gene=HP0673;inference=ab initio prediction:Prodigal:002006,similar to AA sequence:Hp26695_curated_for_HpGP.faa:AAD07739.1;locus_tag=NC_000915_00691;product=Predicted coding region HP0673	2		-Log10(P-value) > 5	ID=NC_000915_00205;Name=HP0203;gene=HP0203;inference=ab initio prediction:Prodigal:002006,similar to AA sequence:Hp26695_curated_for_HpGP.faa:AAD07274.1;locus_tag=NC_000915_00205;product=Hypothetical protein HP0203	2		-Log10(P-value) > 5	ID=NC_000915_00205;Name=HP0203;gene=HP0203;inference=ab initio prediction:Prodigal:002006,similar to AA sequence:Hp26695_curated_for_HpGP.faa:AAD07274.1;locus_tag=NC_000915_00205;product=Hypothetical protein HP0203	1		-Log10(P-value) > 5	ID=NC_000915_00101;Name=HP0097;gene=HP0097;inference=ab initio prediction:Prodigal:002006,similar to AA sequence:Hp26695_curated_for_HpGP.faa:AAD07171.1;locus_tag=NC_000915_00101;product=Hypothetical protein HP0097	1		-Log10(P-value) > 5	ID=NC_000915_00292;Name=HP0288;gene=HP0288;inference=ab initio prediction:Prodigal:002006,similar to AA sequence:Hp26695_curated_for_HpGP.faa:AAD07360.1;locus_tag=NC_000915_00292;product=Hypothetical protein HP0288	1		-Log10(P-value) > 5	ID=NC_000915_00239;Name=HP0235;gene=HP0235;inference=ab initio prediction:Prodigal:002006,similar to AA sequence:Hp26695_curated_for_HpGP.faa:AAD07303.1;locus_tag=NC_000915_00239;product=Cysteine-rich protein E%2C beta-lactamase HcpE	1
-Log10(P-value) > 5	ID=NC_000915_00722;Name=HP0706;gene=HP0706;inference=ab initio prediction:Prodigal:002006,similar to AA sequence:Hp26695_curated_for_HpGP.faa:AAD07756.1;locus_tag=NC_000915_00722;product=Outer membrane protein HopE	3		-Log10(P-value) > 5	ID=NC_000915_01138;Name=HP1112;gene=HP1112;inference=ab initio prediction:Prodigal:002006,similar to AA sequence:Hp26695_curated_for_HpGP.faa:AAD08156.1;locus_tag=NC_000915_01138;product=Adenylosuccinate lyase PurB	2		-Log10(P-value) > 5	ID=NC_000915_00811;Name=HP0795;gene=HP0795;inference=ab initio prediction:Prodigal:002006,similar to AA sequence:Hp26695_curated_for_HpGP.faa:AAD07843.1;locus_tag=NC_000915_00811;product=Trigger factor	2		-Log10(P-value) > 5	ID=NC_000915_00298;Name=HP0294;gene=HP0294;inference=ab initio prediction:Prodigal:002006,similar to AA sequence:Hp26695_curated_for_HpGP.faa:AAD07363.1;locus_tag=NC_000915_00298;product=Acylamide amidohydrolase AmiE	1		-Log10(P-value) > 5	ID=NC_000915_00305;Name=HP0301;gene=HP0301;inference=ab initio prediction:Prodigal:002006,similar to AA sequence:Hp26695_curated_for_HpGP.faa:AAD07370.1;locus_tag=NC_000915_00305;product=Dipeptide ABC transporter%2C ATP-binding protein DppD	1		-Log10(P-value) > 5	ID=NC_000915_00431;Name=HP0422;gene=HP0422;inference=ab initio prediction:Prodigal:002006,similar to AA sequence:Hp26695_curated_for_HpGP.faa:AAD07486.1;locus_tag=NC_000915_00431;product=Arginine decarboxylase	1		-Log10(P-value) > 5	ID=NC_000915_00085;Name=HP0082;gene=HP0082;inference=ab initio prediction:Prodigal:002006,similar to AA sequence:Hp26695_curated_for_HpGP.faa:AAD07152.1;locus_tag=NC_000915_00085;product=Methyl-accepting chemotaxis protein TlpC	1
-Log10(P-value) > 5	ID=NC_000915_00804;Name=HP0788;gene=HP0788;inference=ab initio prediction:Prodigal:002006,similar to AA sequence:Hp26695_curated_for_HpGP.faa:AAD07845.1;locus_tag=NC_000915_00804;product=Outer membrane protein HofF	2		-Log10(P-value) > 5	ID=NC_000915_01083;Name=HP1056;gene=HP1056;inference=ab initio prediction:Prodigal:002006,similar to AA sequence:Hp26695_curated_for_HpGP.faa:AAD08108.1;locus_tag=NC_000915_01083;product=Hypothetical protein HP1056	2		-Log10(P-value) > 5	ID=NC_000915_00385;Name=HP0380;gene=HP0380;inference=ab initio prediction:Prodigal:002006,similar to AA sequence:Hp26695_curated_for_HpGP.faa:AAD07448.1;locus_tag=NC_000915_00385;product=Glutamate dehydrogenase GdhA	1		-Log10(P-value) > 5	ID=NC_000915_00410;Name=HP0405;gene=HP0405;inference=ab initio prediction:Prodigal:002006,similar to AA sequence:Hp26695_curated_for_HpGP.faa:AAD07474.1;locus_tag=NC_000915_00410;product=NifS-like protein	1		-Log10(P-value) > 5	ID=NC_000915_00117;Name=HP0113;gene=HP0113;inference=ab initio prediction:Prodigal:002006,similar to AA sequence:Hp26695_curated_for_HpGP.faa:AAD07187.1;locus_tag=NC_000915_00117;product=Hypothetical protein HP0113	1		-Log10(P-value) > 5	ID=NC_000915_00490;Name=HP0478;gene=HP0478;inference=ab initio prediction:Prodigal:002006,similar to AA sequence:Hp26695_curated_for_HpGP.faa:AAD07545.1;locus_tag=NC_000915_00490;product=Adenine specific DNA methyltransferase M.HpyAVII	1		-Log10(P-value) > 5	ID=NC_000915_00562;Name=HP0547;gene=HP0547;inference=ab initio prediction:Prodigal:002006,similar to AA sequence:Hp26695_curated_for_HpGP.faa:AAD07614.1;locus_tag=NC_000915_00562;product=CagPAI Type IV secretion system oncogenic effector CagA	1
-Log10(P-value) > 5	ID=NC_000915_01541;Name=HP1512;gene=HP1512;inference=ab initio prediction:Prodigal:002006,similar to AA sequence:Hp26695_curated_for_HpGP.faa:AAD08553.1;locus_tag=NC_000915_01541;product=Iron-regulated outer membrane protein FrpB4	2		-Log10(P-value) > 5	ID=NC_000915_00133;Name=HP0132;gene=HP0132;inference=ab initio prediction:Prodigal:002006,similar to AA sequence:Hp26695_curated_for_HpGP.faa:AAD07202.1;locus_tag=NC_000915_00133;product=L-serine ammonia-lyase SdaA%2C SdaB	1		Fst > 0.6	ID=NC_000915_01541;Name=HP1512;gene=HP1512;inference=ab initio prediction:Prodigal:002006,similar to AA sequence:Hp26695_curated_for_HpGP.faa:AAD08553.1;locus_tag=NC_000915_01541;product=Iron-regulated outer membrane protein FrpB4	41		-Log10(P-value) > 5	ID=NC_000915_00466;Name=HP0455;gene=HP0455;inference=ab initio prediction:Prodigal:002006,similar to AA sequence:Hp26695_curated_for_HpGP.faa:AAD07533.1;locus_tag=NC_000915_00466;product=Predicted coding region HP0455%2C ICEHpt3_C21	1		-Log10(P-value) > 5	ID=NC_000915_00605;Name=HP0589;gene=HP0589;inference=ab initio prediction:Prodigal:002006,similar to AA sequence:Hp26695_curated_for_HpGP.faa:AAD07654.1;locus_tag=NC_000915_00605;product=2-oxoglutarate-acceptor oxidoreductase subunit OorA	1		-Log10(P-value) > 5	ID=NC_000915_00650;Name=HP0632;gene=HP0632;inference=ab initio prediction:Prodigal:002006,similar to AA sequence:Hp26695_curated_for_HpGP.faa:AAD07692.1;locus_tag=NC_000915_00650;product=Quinone-reactive Ni/Fe hydrogenase%2C large subunit HydB	1		-Log10(P-value) > 5	ID=NC_000915_00257;Name=HP0252;gene=HP0252;inference=ab initio prediction:Prodigal:002006,similar to AA sequence:Hp26695_curated_for_HpGP.faa:AAD07319.1;locus_tag=NC_000915_00257;product=Outer membrane protein HopF	1
-Log10(P-value) > 5	ID=NC_000915_01137;Name=HP1111;gene=HP1111;inference=ab initio prediction:Prodigal:002006,similar to AA sequence:Hp26695_curated_for_HpGP.faa:AAD08155.1;locus_tag=NC_000915_01137;product=Pyruvate ferredoxin oxidoreductase%2C beta subunit PorB	2		-Log10(P-value) > 5	ID=NC_000915_00205;Name=HP0203;gene=HP0203;inference=ab initio prediction:Prodigal:002006,similar to AA sequence:Hp26695_curated_for_HpGP.faa:AAD07274.1;locus_tag=NC_000915_00205;product=Hypothetical protein HP0203	1		Fst > 0.6	ID=NC_000915_00101;Name=HP0097;gene=HP0097;inference=ab initio prediction:Prodigal:002006,similar to AA sequence:Hp26695_curated_for_HpGP.faa:AAD07171.1;locus_tag=NC_000915_00101;product=Hypothetical protein HP0097	8		-Log10(P-value) > 5	ID=NC_000915_00590;Name=HP0575;gene=HP0575;inference=ab initio prediction:Prodigal:002006,similar to AA sequence:Hp26695_curated_for_HpGP.faa:AAD07642.1;locus_tag=NC_000915_00590;product=Peptidase M50	1		-Log10(P-value) > 5	ID=NC_000915_00583;Name=HP0568;gene=HP0568;inference=ab initio prediction:Prodigal:002006,similar to AA sequence:Hp26695_curated_for_HpGP.faa:AAD07630.1;locus_tag=NC_000915_00583;product=Hypothetical protein HP0568	1		-Log10(P-value) > 5	ID=NC_000915_00819;Name=HP0803;gene=HP0803;inference=ab initio prediction:Prodigal:002006,similar to AA sequence:Hp26695_curated_for_HpGP.faa:AAD07858.1;locus_tag=NC_000915_00819;product=Hypothetical protein HP0803	1		-Log10(P-value) > 5	ID=NC_000915_00737;Name=HP0721;gene=HP0721;inference=ab initio prediction:Prodigal:002006,similar to AA sequence:Hp26695_curated_for_HpGP.faa:AAD07777.1;locus_tag=NC_000915_00737;product=High-affinity zinc transporter periplasmic component	1
-Log10(P-value) > 5	ID=NC_000915_00562;Name=HP0547;gene=HP0547;inference=ab initio prediction:Prodigal:002006,similar to AA sequence:Hp26695_curated_for_HpGP.faa:AAD07614.1;locus_tag=NC_000915_00562;product=CagPAI Type IV secretion system oncogenic effector CagA	1		-Log10(P-value) > 5	ID=NC_000915_00139;Name=HP0138;gene=HP0138;inference=ab initio prediction:Prodigal:002006,similar to AA sequence:Hp26695_curated_for_HpGP.faa:AAD07206.1;locus_tag=NC_000915_00139;product=Iron-sulfur cluster binding protein	1		Fst > 0.6	ID=NC_000915_00257;Name=HP0252;gene=HP0252;inference=ab initio prediction:Prodigal:002006,similar to AA sequence:Hp26695_curated_for_HpGP.faa:AAD07319.1;locus_tag=NC_000915_00257;product=Outer membrane protein HopF	6		-Log10(P-value) > 5	ID=NC_000915_00656;Name=HP0638;gene=HP0638;inference=ab initio prediction:Prodigal:002006,similar to AA sequence:Hp26695_curated_for_HpGP.faa:AAD07715.1;locus_tag=NC_000915_00656;product=Outer membrane protein OipA/HopH	1		-Log10(P-value) > 5	ID=NC_000915_00676;Name=HP0658;gene=HP0658;inference=ab initio prediction:Prodigal:002006,similar to AA sequence:Hp26695_curated_for_HpGP.faa:AAD07723.1;locus_tag=NC_000915_00676;product=Aspartyl/glutamyl-tRNA amidotransferase subunit B	1		-Log10(P-value) > 5	ID=NC_000915_01194;Name=HP1167;gene=HP1167;inference=ab initio prediction:Prodigal:002006,similar to AA sequence:Hp26695_curated_for_HpGP.faa:AAD08213.1;locus_tag=NC_000915_01194;product=Outer membrane protein HofH	1		-Log10(P-value) > 5	ID=NC_000915_00903;Name=HP0887;gene=HP0887;inference=ab initio prediction:Prodigal:002006,similar to AA sequence:Hp26695_curated_for_HpGP.faa:AAD07935.1;locus_tag=NC_000915_00903;product=Vacuolating cytotoxin VacA	1
-Log10(P-value) > 5	ID=NC_000915_00534;Name=HP0518;gene=HP0518;inference=ab initio prediction:Prodigal:002006,similar to AA sequence:Hp26695_curated_for_HpGP.faa:AAD07586.1;locus_tag=NC_000915_00534;product=Putative periplasmic protein involved in flagellin deglycosylation	1		-Log10(P-value) > 5	ID=NC_000915_00120;Name=HP0116;gene=HP0116;inference=ab initio prediction:Prodigal:002006,similar to AA sequence:Hp26695_curated_for_HpGP.faa:AAD07184.1;locus_tag=NC_000915_00120;product=DNA topoisomerase I TopA	1		Fst > 0.6	ID=NC_000915_01353;Name=HP1322;gene=HP1322;inference=ab initio prediction:Prodigal:002006,similar to AA sequence:Hp26695_curated_for_HpGP.faa:AAD08374.1;locus_tag=NC_000915_01353;product=Hypothetical protein HP1322	3		-Log10(P-value) > 5	ID=NC_000915_00690;Name=HP0672;gene=HP0672;inference=ab initio prediction:Prodigal:002006,similar to AA sequence:Hp26695_curated_for_HpGP.faa:AAD07733.1;locus_tag=NC_000915_00690;product=Aspartate aminotransferase	1		-Log10(P-value) > 5	ID=NC_000915_00989;Name=HP0966;gene=HP0966;inference=ab initio prediction:Prodigal:002006,similar to AA sequence:Hp26695_curated_for_HpGP.faa:AAD08010.1;locus_tag=NC_000915_00989;product=Hypothetical protein HP0966	1		-Log10(P-value) > 5	ID=NC_000915_01425;Name=HP1394;gene=HP1394;inference=ab initio prediction:Prodigal:002006,similar to AA sequence:Hp26695_curated_for_HpGP.faa:AAD08434.1;locus_tag=NC_000915_01425;product=Putative inorganic polyphosphate/ATP-NAD kinase PpnK	1		-Log10(P-value) > 5	ID=NC_000915_01170;Name=HP1143;gene=HP1143;inference=ab initio prediction:Prodigal:002006,similar to AA sequence:Hp26695_curated_for_HpGP.faa:AAD08189.1;locus_tag=NC_000915_01170;product=Hypothetical protein HP1143	1
-Log10(P-value) > 5	ID=NC_000915_00797;Name=HP0781;gene=HP0781;inference=ab initio prediction:Prodigal:002006,similar to AA sequence:Hp26695_curated_for_HpGP.faa:AAD07834.1;locus_tag=NC_000915_00797;product=Hypothetical protein HP0781	1		-Log10(P-value) > 5	ID=NC_000915_00361;Name=HP0358;gene=HP0358;inference=ab initio prediction:Prodigal:002006,similar to AA sequence:Hp26695_curated_for_HpGP.faa:AAD07427.1;locus_tag=NC_000915_00361;product=Putative outer membrane protein HP0358	1		Fst > 0.6	ID=NC_000915_00527;Name=HP0512;gene=HP0512;inference=ab initio prediction:Prodigal:002006,similar to AA sequence:Hp26695_curated_for_HpGP.faa:AAD07575.1;locus_tag=NC_000915_00527;product=Glutamine synthetase GlnA	2		-Log10(P-value) > 5	ID=NC_000915_00733;Name=HP0717;gene=HP0717;inference=ab initio prediction:Prodigal:002006,similar to AA sequence:Hp26695_curated_for_HpGP.faa:AAD07767.1;locus_tag=NC_000915_00733;product=DNA polymerase III subunits gamma and tau	1		-Log10(P-value) > 5	ID=NC_000915_01267;Name=HP1235;gene=HP1235;inference=ab initio prediction:Prodigal:002006,similar to AA sequence:Hp26695_curated_for_HpGP.faa:AAD08278.1;locus_tag=NC_000915_01267;product=Integral membrane protein HP1235	1		-Log10(P-value) > 5	ID=NC_000915_01555;Name=HP1526;gene=HP1526;inference=ab initio prediction:Prodigal:002006,similar to AA sequence:Hp26695_curated_for_HpGP.faa:AAD08563.1;locus_tag=NC_000915_01555;product=Exodeoxyribonuclease III ExoA	1		Condition	Annotation	SNPs count
-Log10(P-value) > 5	ID=NC_000915_00784;Name=HP0768;gene=HP0768;inference=ab initio prediction:Prodigal:002006,similar to AA sequence:Hp26695_curated_for_HpGP.faa:AAD07817.1;locus_tag=NC_000915_00784;product=Molybdenum cofactor biosynthesis protein A MoaA	1		-Log10(P-value) > 5	ID=NC_000915_00380;Name=HP0375;gene=HP0375;inference=ab initio prediction:Prodigal:002006,similar to AA sequence:Hp26695_curated_for_HpGP.faa:AAD07449.1;locus_tag=NC_000915_00380;product=Hypothetical protein HP0375	1		Fst > 0.6	ID=NC_000915_00107;Name=HP0103;gene=HP0103;inference=ab initio prediction:Prodigal:002006,similar to AA sequence:Hp26695_curated_for_HpGP.faa:AAD07173.1;locus_tag=NC_000915_00107;product=Methyl-accepting chemotaxis protein TlpB	2		-Log10(P-value) > 5	ID=NC_000915_00893;Name=HP0875;gene=HP0875;inference=ab initio prediction:Prodigal:002006,similar to AA sequence:Hp26695_curated_for_HpGP.faa:AAD07923.1;locus_tag=NC_000915_00893;product=Catalase KatA	1		-Log10(P-value) > 5	ID=NC_000915_01372;Name=HP1341;gene=HP1341;inference=ab initio prediction:Prodigal:002006,similar to AA sequence:Hp26695_curated_for_HpGP.faa:AAD08383.1;locus_tag=NC_000915_01372;product=Siderophore-mediated iron transport protein TonB	1		-Log10(P-value) > 5	ID=NC_000915_01613;Name=HP1585;gene=HP1585;inference=ab initio prediction:Prodigal:002006,similar to AA sequence:Hp26695_curated_for_HpGP.faa:AAD08623.1;locus_tag=NC_000915_01613;product=Flagellar basal body rod protein FlgG	1		Fst > 0.6	ID=NC_000915_00627;Name=HP0610;gene=HP0610;inference=ab initio prediction:Prodigal:002006,similar to AA sequence:Hp26695_curated_for_HpGP.faa:AAD07675.1;locus_tag=NC_000915_00627;product=Putative vacuolating cytotoxin (VacA)-like protein FaaA2	45
-Log10(P-value) > 5	ID=NC_000915_00079;Name=HP0075;gene=HP0075;inference=ab initio prediction:Prodigal:002006,similar to AA sequence:Hp26695_curated_for_HpGP.faa:AAD07146.1;locus_tag=NC_000915_00079;product=Phosphoglucosamine mutase	1		-Log10(P-value) > 5	ID=NC_000915_00240;Name=HP0236;gene=HP0236;inference=ab initio prediction:Prodigal:002006,similar to AA sequence:Hp26695_curated_for_HpGP.faa:AAD07310.1;locus_tag=NC_000915_00240;product=Hypothetical protein HP0236	1		Fst > 0.6	ID=NC_000915_01370;Name=HP1339;gene=HP1339;inference=ab initio prediction:Prodigal:002006,similar to AA sequence:Hp26695_curated_for_HpGP.faa:AAD08381.1;locus_tag=NC_000915_01370;product=Biopolymer transport protein ExbB	2		-Log10(P-value) > 5	ID=NC_000915_00989;Name=HP0966;gene=HP0966;inference=ab initio prediction:Prodigal:002006,similar to AA sequence:Hp26695_curated_for_HpGP.faa:AAD08010.1;locus_tag=NC_000915_00989;product=Hypothetical protein HP0966	1		Condition	Annotation	SNPs count		Condition	Annotation	SNPs count		Fst > 0.6	ID=NC_000915_00602;Name=HP0586;gene=HP0586;inference=ab initio prediction:Prodigal:002006,similar to AA sequence:Hp26695_curated_for_HpGP.faa:AAD07658.1;locus_tag=NC_000915_00602;product=Hypothetical protein HP0586	19
-Log10(P-value) > 5	ID=NC_000915_00102;Name=HP0098;gene=HP0098;inference=ab initio prediction:Prodigal:002006,similar to AA sequence:Hp26695_curated_for_HpGP.faa:AAD07166.1;locus_tag=NC_000915_00102;product=Threonine synthase ThrC	1		-Log10(P-value) > 5	ID=NC_000915_00385;Name=HP0380;gene=HP0380;inference=ab initio prediction:Prodigal:002006,similar to AA sequence:Hp26695_curated_for_HpGP.faa:AAD07448.1;locus_tag=NC_000915_00385;product=Glutamate dehydrogenase GdhA	1		Fst > 0.6	ID=NC_000915_01371;Name=HP1340;gene=HP1340;inference=ab initio prediction:Prodigal:002006,similar to AA sequence:Hp26695_curated_for_HpGP.faa:AAD08382.1;locus_tag=NC_000915_01371;product=Biopolymer transport protein ExbD	2		-Log10(P-value) > 5	ID=NC_000915_01078;Name=HP1051;gene=HP1051;inference=ab initio prediction:Prodigal:002006,similar to AA sequence:Hp26695_curated_for_HpGP.faa:AAD08097.1;locus_tag=NC_000915_01078;product=Universal bacterial protein YeaZ	1		Fst > 0.6	ID=NC_000915_01184;Name=HP1157;gene=HP1157;inference=ab initio prediction:Prodigal:002006,similar to AA sequence:Hp26695_curated_for_HpGP.faa:AAD08205.1;locus_tag=NC_000915_01184;product=Outer membrane protein HopL	16		Fst > 0.6	ID=NC_000915_01184;Name=HP1157;gene=HP1157;inference=ab initio prediction:Prodigal:002006,similar to AA sequence:Hp26695_curated_for_HpGP.faa:AAD08205.1;locus_tag=NC_000915_01184;product=Outer membrane protein HopL	16		Fst > 0.6	ID=NC_000915_00416;Name=HP0410;gene=HP0410;inference=ab initio prediction:Prodigal:002006,similar to AA sequence:Hp26695_curated_for_HpGP.faa:AAD07478.1;locus_tag=NC_000915_00416;product=Putative neuraminyllactose-binding hemagglutinin-like protein	16
-Log10(P-value) > 5	ID=NC_000915_00889;Name=HP0871;gene=HP0871;inference=ab initio prediction:Prodigal:002006,similar to AA sequence:Hp26695_curated_for_HpGP.faa:AAD07921.1;locus_tag=NC_000915_00889;product=CDP-diacylglycerol pyrophosphatase	1		-Log10(P-value) > 5	ID=NC_000915_00392;Name=HP0387;gene=HP0387;inference=ab initio prediction:Prodigal:002006,similar to AA sequence:Hp26695_curated_for_HpGP.faa:AAD07452.1;locus_tag=NC_000915_00392;product=Primosome assembly protein PriA	1		Fst > 0.6	ID=NC_000915_00424;Name=HP0415;gene=HP0415;inference=ab initio prediction:Prodigal:002006,similar to AA sequence:Hp26695_curated_for_HpGP.faa:AAD07481.1;locus_tag=NC_000915_00424;product=Potassium efflux system protein/Small-conductance mechanosensitive channel	1		-Log10(P-value) > 5	ID=NC_000915_01479;Name=HP1448;gene=HP1448;inference=ab initio prediction:Prodigal:002006,similar to AA sequence:Hp26695_curated_for_HpGP.faa:AAD08489.1;locus_tag=NC_000915_01479;product=Ribonuclease P protein component	1		Fst > 0.6	ID=NC_000915_00602;Name=HP0586;gene=HP0586;inference=ab initio prediction:Prodigal:002006,similar to AA sequence:Hp26695_curated_for_HpGP.faa:AAD07658.1;locus_tag=NC_000915_00602;product=Hypothetical protein HP0586	14		Fst > 0.6	ID=NC_000915_00602;Name=HP0586;gene=HP0586;inference=ab initio prediction:Prodigal:002006,similar to AA sequence:Hp26695_curated_for_HpGP.faa:AAD07658.1;locus_tag=NC_000915_00602;product=Hypothetical protein HP0586	14		Fst > 0.6	ID=NC_000915_00903;Name=HP0887;gene=HP0887;inference=ab initio prediction:Prodigal:002006,similar to AA sequence:Hp26695_curated_for_HpGP.faa:AAD07935.1;locus_tag=NC_000915_00903;product=Vacuolating cytotoxin VacA	16
-Log10(P-value) > 5	ID=NC_000915_00798;Name=HP0782;gene=HP0782;inference=ab initio prediction:Prodigal:002006,similar to AA sequence:Hp26695_curated_for_HpGP.faa:AAD07835.1;locus_tag=NC_000915_00798;product=Outer membrane protein HofE	1		-Log10(P-value) > 5	ID=NC_000915_00474;Name=HP0462;gene=HP0462;inference=ab initio prediction:Prodigal:002006,similar to AA sequence:Hp26695_curated_for_HpGP.faa:AAD07524.1;locus_tag=NC_000915_00474;product=Type I restriction enzyme S protein S.HpyAORF463P	1		Fst > 0.6	ID=NC_000915_00141;Name=HP0140;gene=HP0140;inference=ab initio prediction:Prodigal:002006,similar to AA sequence:Hp26695_curated_for_HpGP.faa:AAD07208.1;locus_tag=NC_000915_00141;product=L-lactate permease LctP1	1		Condition	Annotation	SNPs count		Fst > 0.6	ID=NC_000915_00627;Name=HP0610;gene=HP0610;inference=ab initio prediction:Prodigal:002006,similar to AA sequence:Hp26695_curated_for_HpGP.faa:AAD07675.1;locus_tag=NC_000915_00627;product=Putative vacuolating cytotoxin (VacA)-like protein FaaA2	10		Fst > 0.6	ID=NC_000915_00027;Name=HP0026;gene=HP0026;inference=ab initio prediction:Prodigal:002006,similar to AA sequence:Hp26695_curated_for_HpGP.faa:AAD07097.1;locus_tag=NC_000915_00027;product=Type II citrate synthase GltA	7		Fst > 0.6	ID=NC_000915_00562;Name=HP0547;gene=HP0547;inference=ab initio prediction:Prodigal:002006,similar to AA sequence:Hp26695_curated_for_HpGP.faa:AAD07614.1;locus_tag=NC_000915_00562;product=CagPAI Type IV secretion system oncogenic effector CagA	15
-Log10(P-value) > 5	ID=NC_000915_00980;Name=HP0957;gene=HP0957;inference=ab initio prediction:Prodigal:002006,similar to AA sequence:Hp26695_curated_for_HpGP.faa:AAD08000.1;locus_tag=NC_000915_00980;product=3-deoxy-D-manno-octulosonic-acid transferase	1		-Log10(P-value) > 5	ID=NC_000915_00502;Name=HP0487;gene=HP0487;inference=ab initio prediction:Prodigal:002006,similar to AA sequence:Hp26695_curated_for_HpGP.faa:AAD07555.1;locus_tag=NC_000915_00502;product=Outer membrane protein HofD	1		Fst > 0.6	ID=NC_000915_00103;Name=HP0099;gene=HP0099;inference=ab initio prediction:Prodigal:002006,similar to AA sequence:Hp26695_curated_for_HpGP.faa:AAD07167.1;locus_tag=NC_000915_00103;product=Methyl-accepting chemotaxis protein TlpA	1		Fst > 0.6	ID=NC_000915_01541;Name=HP1512;gene=HP1512;inference=ab initio prediction:Prodigal:002006,similar to AA sequence:Hp26695_curated_for_HpGP.faa:AAD08553.1;locus_tag=NC_000915_01541;product=Iron-regulated outer membrane protein FrpB4	38		Fst > 0.6	ID=NC_000915_00257;Name=HP0252;gene=HP0252;inference=ab initio prediction:Prodigal:002006,similar to AA sequence:Hp26695_curated_for_HpGP.faa:AAD07319.1;locus_tag=NC_000915_00257;product=Outer membrane protein HopF	8		Fst > 0.6	ID=NC_000915_01353;Name=HP1322;gene=HP1322;inference=ab initio prediction:Prodigal:002006,similar to AA sequence:Hp26695_curated_for_HpGP.faa:AAD08374.1;locus_tag=NC_000915_01353;product=Hypothetical protein HP1322	7		Fst > 0.6	ID=NC_000915_01370;Name=HP1339;gene=HP1339;inference=ab initio prediction:Prodigal:002006,similar to AA sequence:Hp26695_curated_for_HpGP.faa:AAD08381.1;locus_tag=NC_000915_01370;product=Biopolymer transport protein ExbB	11
-Log10(P-value) > 5	ID=NC_000915_00938;Name=HP0919;gene=HP0919;inference=ab initio prediction:Prodigal:002006,similar to AA sequence:Hp26695_curated_for_HpGP.faa:AAD07963.1;locus_tag=NC_000915_00938;product=Carbamoyl phosphate synthase (glutamine hydrolysing) large subunit CarB	1		-Log10(P-value) > 5	ID=NC_000915_00297;Name=HP0293;gene=HP0293;inference=ab initio prediction:Prodigal:002006,similar to AA sequence:Hp26695_curated_for_HpGP.faa:AAD07357.1;locus_tag=NC_000915_00297;product=Para-aminobenzoate synthetase PabB	1		Fst > 0.6	ID=NC_000915_00027;Name=HP0026;gene=HP0026;inference=ab initio prediction:Prodigal:002006,similar to AA sequence:Hp26695_curated_for_HpGP.faa:AAD07097.1;locus_tag=NC_000915_00027;product=Type II citrate synthase GltA	1		Fst > 0.6	ID=NC_000915_00501;Name=HP0486;gene=HP0486;inference=ab initio prediction:Prodigal:002006,similar to AA sequence:Hp26695_curated_for_HpGP.faa:AAD07554.1;locus_tag=NC_000915_00501;product=Outer membrane protein HofC	25		Fst > 0.6	ID=NC_000915_00027;Name=HP0026;gene=HP0026;inference=ab initio prediction:Prodigal:002006,similar to AA sequence:Hp26695_curated_for_HpGP.faa:AAD07097.1;locus_tag=NC_000915_00027;product=Type II citrate synthase GltA	6		Fst > 0.6	ID=NC_000915_00932;Name=HP0912;gene=HP0912;inference=ab initio prediction:Prodigal:002006,similar to AA sequence:Hp26695_curated_for_HpGP.faa:AAD07960.1;locus_tag=NC_000915_00932;product=Outer membrane protein AlpA/HopC	7		Fst > 0.6	ID=NC_000915_00734;Name=HP0718;gene=HP0718;inference=ab initio prediction:Prodigal:002006,similar to AA sequence:Hp26695_curated_for_HpGP.faa:AAD07771.1;locus_tag=NC_000915_00734;product=L-Lysine Exporter LysE	8
-Log10(P-value) > 5	ID=NC_000915_01056;Name=HP1029;gene=HP1029;inference=ab initio prediction:Prodigal:002006,similar to AA sequence:Hp26695_curated_for_HpGP.faa:AAD08084.1;locus_tag=NC_000915_01056;product=Hypothetical protein HP1029	1		-Log10(P-value) > 5	ID=NC_000915_00013;Name=HP0010;gene=HP0010;inference=ab initio prediction:Prodigal:002006,similar to AA sequence:Hp26695_curated_for_HpGP.faa:AAD07080.1;locus_tag=NC_000915_00013;product=Chaperone and heat shock protein GroEL	1		Fst > 0.6	ID=NC_000915_00213;Name=HP0209;gene=HP0209;inference=ab initio prediction:Prodigal:002006,similar to AA sequence:Hp26695_curated_for_HpGP.faa:AAD07285.1;locus_tag=NC_000915_00213;product=Outer membrane protein HofA	1		Fst > 0.6	ID=NC_000915_00602;Name=HP0586;gene=HP0586;inference=ab initio prediction:Prodigal:002006,similar to AA sequence:Hp26695_curated_for_HpGP.faa:AAD07658.1;locus_tag=NC_000915_00602;product=Hypothetical protein HP0586	19		Fst > 0.6	ID=NC_000915_00932;Name=HP0912;gene=HP0912;inference=ab initio prediction:Prodigal:002006,similar to AA sequence:Hp26695_curated_for_HpGP.faa:AAD07960.1;locus_tag=NC_000915_00932;product=Outer membrane protein AlpA/HopC	6		Fst > 0.6	ID=NC_000915_00627;Name=HP0610;gene=HP0610;inference=ab initio prediction:Prodigal:002006,similar to AA sequence:Hp26695_curated_for_HpGP.faa:AAD07675.1;locus_tag=NC_000915_00627;product=Putative vacuolating cytotoxin (VacA)-like protein FaaA2	6		Fst > 0.6	ID=NC_000915_01541;Name=HP1512;gene=HP1512;inference=ab initio prediction:Prodigal:002006,similar to AA sequence:Hp26695_curated_for_HpGP.faa:AAD08553.1;locus_tag=NC_000915_01541;product=Iron-regulated outer membrane protein FrpB4	8
-Log10(P-value) > 5	ID=NC_000915_01078;Name=HP1051;gene=HP1051;inference=ab initio prediction:Prodigal:002006,similar to AA sequence:Hp26695_curated_for_HpGP.faa:AAD08097.1;locus_tag=NC_000915_01078;product=Universal bacterial protein YeaZ	1		-Log10(P-value) > 5	ID=NC_000915_00090;Name=HP0087;gene=HP0087;inference=ab initio prediction:Prodigal:002006,similar to AA sequence:Hp26695_curated_for_HpGP.faa:AAD07159.1;locus_tag=NC_000915_00090;product=Putative lipoprotein	1		Fst > 0.6	ID=NC_000915_00813;Name=HP0797;gene=HP0797;inference=ab initio prediction:Prodigal:002006,similar to AA sequence:Hp26695_curated_for_HpGP.faa:AAD07844.1;locus_tag=NC_000915_00813;product=Neuraminyllactose-binding hemagglutinin HpaA	1		Fst > 0.6	ID=NC_000915_01184;Name=HP1157;gene=HP1157;inference=ab initio prediction:Prodigal:002006,similar to AA sequence:Hp26695_curated_for_HpGP.faa:AAD08205.1;locus_tag=NC_000915_01184;product=Outer membrane protein HopL	15		Fst > 0.6	ID=NC_000915_01541;Name=HP1512;gene=HP1512;inference=ab initio prediction:Prodigal:002006,similar to AA sequence:Hp26695_curated_for_HpGP.faa:AAD08553.1;locus_tag=NC_000915_01541;product=Iron-regulated outer membrane protein FrpB4	6		Fst > 0.6	ID=NC_000915_00611;Name=HP0595;gene=HP0595;inference=ab initio prediction:Prodigal:002006,similar to AA sequence:Hp26695_curated_for_HpGP.faa:AAD07664.1;locus_tag=NC_000915_00611;product=Disulfide bond formation protein	6		Fst > 0.6	ID=NC_000915_00101;Name=HP0097;gene=HP0097;inference=ab initio prediction:Prodigal:002006,similar to AA sequence:Hp26695_curated_for_HpGP.faa:AAD07171.1;locus_tag=NC_000915_00101;product=Hypothetical protein HP0097	8
-Log10(P-value) > 5	ID=NC_000915_01166;Name=HP1139;gene=HP1139;inference=ab initio prediction:Prodigal:002006,similar to AA sequence:Hp26695_curated_for_HpGP.faa:AAD08185.1;locus_tag=NC_000915_01166;product=SpoOJ regulator Soj	1		-Log10(P-value) > 5	ID=NC_000915_00058;Name=HP0056;gene=HP0056;inference=ab initio prediction:Prodigal:002006,similar to AA sequence:Hp26695_curated_for_HpGP.faa:AAD07126.1;locus_tag=NC_000915_00058;product=Delta-1-pyrroline-5-carboxylate dehydrogenase PutA	1		Fst > 0.6	ID=NC_000915_00656;Name=HP0638;gene=HP0638;inference=ab initio prediction:Prodigal:002006,similar to AA sequence:Hp26695_curated_for_HpGP.faa:AAD07715.1;locus_tag=NC_000915_00656;product=Outer membrane protein OipA/HopH	1		Fst > 0.6	ID=NC_000915_00627;Name=HP0610;gene=HP0610;inference=ab initio prediction:Prodigal:002006,similar to AA sequence:Hp26695_curated_for_HpGP.faa:AAD07675.1;locus_tag=NC_000915_00627;product=Putative vacuolating cytotoxin (VacA)-like protein FaaA2	10		Fst > 0.6	ID=NC_000915_00501;Name=HP0486;gene=HP0486;inference=ab initio prediction:Prodigal:002006,similar to AA sequence:Hp26695_curated_for_HpGP.faa:AAD07554.1;locus_tag=NC_000915_00501;product=Outer membrane protein HofC	5		Fst > 0.6	ID=NC_000915_00501;Name=HP0486;gene=HP0486;inference=ab initio prediction:Prodigal:002006,similar to AA sequence:Hp26695_curated_for_HpGP.faa:AAD07554.1;locus_tag=NC_000915_00501;product=Outer membrane protein HofC	5		Fst > 0.6	ID=NC_000915_00027;Name=HP0026;gene=HP0026;inference=ab initio prediction:Prodigal:002006,similar to AA sequence:Hp26695_curated_for_HpGP.faa:AAD07097.1;locus_tag=NC_000915_00027;product=Type II citrate synthase GltA	8
-Log10(P-value) > 5	ID=NC_000915_00946;Name=HP0927;gene=HP0927;inference=ab initio prediction:Prodigal:002006,similar to AA sequence:Hp26695_curated_for_HpGP.faa:AAD07972.1;locus_tag=NC_000915_00946;product=Heat shock protein HtpX	1		-Log10(P-value) > 5	ID=NC_000915_00665;Name=HP0647;gene=HP0647;inference=ab initio prediction:Prodigal:002006,similar to AA sequence:Hp26695_curated_for_HpGP.faa:AAD07717.1;locus_tag=NC_000915_00665;product=Hypothetical protein HP0647	1		Fst > 0.6	ID=NC_000915_00932;Name=HP0912;gene=HP0912;inference=ab initio prediction:Prodigal:002006,similar to AA sequence:Hp26695_curated_for_HpGP.faa:AAD07960.1;locus_tag=NC_000915_00932;product=Outer membrane protein AlpA/HopC	1		Fst > 0.6	ID=NC_000915_00101;Name=HP0097;gene=HP0097;inference=ab initio prediction:Prodigal:002006,similar to AA sequence:Hp26695_curated_for_HpGP.faa:AAD07171.1;locus_tag=NC_000915_00101;product=Hypothetical protein HP0097	8		Fst > 0.6	ID=NC_000915_00572;Name=HP0556;gene=HP0556;inference=ab initio prediction:Prodigal:002006,similar to AA sequence:Hp26695_curated_for_HpGP.faa:AAD07631.1;locus_tag=NC_000915_00572;product=Hypothetical protein HP0556	5		Fst > 0.6	ID=NC_000915_00572;Name=HP0556;gene=HP0556;inference=ab initio prediction:Prodigal:002006,similar to AA sequence:Hp26695_curated_for_HpGP.faa:AAD07631.1;locus_tag=NC_000915_00572;product=Hypothetical protein HP0556	4		Fst > 0.6	ID=NC_000915_00798;Name=HP0782;gene=HP0782;inference=ab initio prediction:Prodigal:002006,similar to AA sequence:Hp26695_curated_for_HpGP.faa:AAD07835.1;locus_tag=NC_000915_00798;product=Outer membrane protein HofE	7
-Log10(P-value) > 5	ID=NC_000915_01202;Name=HP1175;gene=HP1175;inference=ab initio prediction:Prodigal:002006,similar to AA sequence:Hp26695_curated_for_HpGP.faa:AAD08220.1;locus_tag=NC_000915_01202;product=Cation symporter-2	1		-Log10(P-value) > 5	ID=NC_000915_00652;Name=HP0634;gene=HP0634;inference=ab initio prediction:Prodigal:002006,similar to AA sequence:Hp26695_curated_for_HpGP.faa:AAD07694.1;locus_tag=NC_000915_00652;product=Quinone-reactive Ni/Fe hydrogenase HydD	1		Fst > 0.6	ID=NC_000915_00921;Name=HP0903m_2;gene=HP0903m_2;inference=ab initio prediction:Prodigal:002006,similar to AA sequence:Hp26695_curated_for_HpGP.faa:WP_010875560.1;locus_tag=NC_000915_00921;product=Acetate kinase	1		Fst > 0.6	ID=NC_000915_00027;Name=HP0026;gene=HP0026;inference=ab initio prediction:Prodigal:002006,similar to AA sequence:Hp26695_curated_for_HpGP.faa:AAD07097.1;locus_tag=NC_000915_00027;product=Type II citrate synthase GltA	8		Fst > 0.6	ID=NC_000915_01370;Name=HP1339;gene=HP1339;inference=ab initio prediction:Prodigal:002006,similar to AA sequence:Hp26695_curated_for_HpGP.faa:AAD08381.1;locus_tag=NC_000915_01370;product=Biopolymer transport protein ExbB	5		Fst > 0.6	ID=NC_000915_00257;Name=HP0252;gene=HP0252;inference=ab initio prediction:Prodigal:002006,similar to AA sequence:Hp26695_curated_for_HpGP.faa:AAD07319.1;locus_tag=NC_000915_00257;product=Outer membrane protein HopF	4		Fst > 0.6	ID=NC_000915_00355;Name=HP0352;gene=HP0352;inference=ab initio prediction:Prodigal:002006,similar to AA sequence:Hp26695_curated_for_HpGP.faa:AAD07420.1;locus_tag=NC_000915_00355;product=Flagellar motor switch protein G FliG	7
-Log10(P-value) > 5	ID=NC_000915_01208;Name=HP1181;gene=HP1181;inference=ab initio prediction:Prodigal:002006,similar to AA sequence:Hp26695_curated_for_HpGP.faa:AAD08227.1;locus_tag=NC_000915_01208;product=Multidrug efflux transporter HP1181	1		-Log10(P-value) > 5	ID=NC_000915_00642;Name=HP0624;gene=HP0624;inference=ab initio prediction:Prodigal:002006,similar to AA sequence:Hp26695_curated_for_HpGP.faa:AAD07687.1;locus_tag=NC_000915_00642;product=N-succinyldiaminopimelate aminotransferase	1		Fst > 0.6	ID=NC_000915_00904;Name=HP0888;gene=HP0888;inference=ab initio prediction:Prodigal:002006,similar to AA sequence:Hp26695_curated_for_HpGP.faa:AAD07936.1;locus_tag=NC_000915_00904;product=Niu inner nickel ABC transporter subunit NiuE%2C previously FecE	1		Fst > 0.6	ID=NC_000915_00804;Name=HP0788;gene=HP0788;inference=ab initio prediction:Prodigal:002006,similar to AA sequence:Hp26695_curated_for_HpGP.faa:AAD07845.1;locus_tag=NC_000915_00804;product=Outer membrane protein HofF	8		Fst > 0.6	ID=NC_000915_00355;Name=HP0352;gene=HP0352;inference=ab initio prediction:Prodigal:002006,similar to AA sequence:Hp26695_curated_for_HpGP.faa:AAD07420.1;locus_tag=NC_000915_00355;product=Flagellar motor switch protein G FliG	4		Fst > 0.6	ID=NC_000915_01541;Name=HP1512;gene=HP1512;inference=ab initio prediction:Prodigal:002006,similar to AA sequence:Hp26695_curated_for_HpGP.faa:AAD08553.1;locus_tag=NC_000915_01541;product=Iron-regulated outer membrane protein FrpB4	4		Fst > 0.6	ID=NC_000915_00597;Name=HP0582;gene=HP0582;inference=ab initio prediction:Prodigal:002006,similar to AA sequence:Hp26695_curated_for_HpGP.faa:AAD07647.1;locus_tag=NC_000915_00597;product=Siderophore-mediated iron transport protein TonB1	6
-Log10(P-value) > 5	ID=NC_000915_01353;Name=HP1322;gene=HP1322;inference=ab initio prediction:Prodigal:002006,similar to AA sequence:Hp26695_curated_for_HpGP.faa:AAD08374.1;locus_tag=NC_000915_01353;product=Hypothetical protein HP1322	1		-Log10(P-value) > 5	ID=NC_000915_00627;Name=HP0610;gene=HP0610;inference=ab initio prediction:Prodigal:002006,similar to AA sequence:Hp26695_curated_for_HpGP.faa:AAD07675.1;locus_tag=NC_000915_00627;product=Putative vacuolating cytotoxin (VacA)-like protein FaaA2	1		Fst > 0.6	ID=NC_000915_00903;Name=HP0887;gene=HP0887;inference=ab initio prediction:Prodigal:002006,similar to AA sequence:Hp26695_curated_for_HpGP.faa:AAD07935.1;locus_tag=NC_000915_00903;product=Vacuolating cytotoxin VacA	1		Fst > 0.6	ID=NC_000915_00932;Name=HP0912;gene=HP0912;inference=ab initio prediction:Prodigal:002006,similar to AA sequence:Hp26695_curated_for_HpGP.faa:AAD07960.1;locus_tag=NC_000915_00932;product=Outer membrane protein AlpA/HopC	7		Fst > 0.6	ID=NC_000915_00659;Name=HP0641;gene=HP0641;inference=ab initio prediction:Prodigal:002006,similar to AA sequence:Hp26695_curated_for_HpGP.faa:AAD07716.1;locus_tag=NC_000915_00659;product=Predicted coding region HP0641	4		Fst > 0.6	ID=NC_000915_00103;Name=HP0099;gene=HP0099;inference=ab initio prediction:Prodigal:002006,similar to AA sequence:Hp26695_curated_for_HpGP.faa:AAD07167.1;locus_tag=NC_000915_00103;product=Methyl-accepting chemotaxis protein TlpA	3		Fst > 0.6	ID=NC_000915_00233;Name=HP0229;gene=HP0229;inference=ab initio prediction:Prodigal:002006,similar to AA sequence:Hp26695_curated_for_HpGP.faa:AAD07298.1;locus_tag=NC_000915_00233;product=Outer membrane protein HopA	5
-Log10(P-value) > 5	ID=NC_000915_01274;Name=HP1243;gene=HP1243;inference=ab initio prediction:Prodigal:002006,similar to AA sequence:Hp26695_curated_for_HpGP.faa:AAD08288.1;locus_tag=NC_000915_01274;product=Blood group antigen binding adhesin BabA	1		-Log10(P-value) > 5	ID=NC_000915_00864;Name=HP0846;gene=HP0846;inference=ab initio prediction:Prodigal:002006,similar to AA sequence:Hp26695_curated_for_HpGP.faa:AAD07892.1;locus_tag=NC_000915_00864;product=Type I restriction enzyme R protein HsdR	1		Fst > 0.6	ID=NC_000915_00893;Name=HP0875;gene=HP0875;inference=ab initio prediction:Prodigal:002006,similar to AA sequence:Hp26695_curated_for_HpGP.faa:AAD07923.1;locus_tag=NC_000915_00893;product=Catalase KatA	1		Fst > 0.6	ID=NC_000915_00257;Name=HP0252;gene=HP0252;inference=ab initio prediction:Prodigal:002006,similar to AA sequence:Hp26695_curated_for_HpGP.faa:AAD07319.1;locus_tag=NC_000915_00257;product=Outer membrane protein HopF	6		Fst > 0.6	ID=NC_000915_01182;Name=HP1155;gene=HP1155;inference=ab initio prediction:Prodigal:002006,similar to AA sequence:Hp26695_curated_for_HpGP.faa:AAD08196.1;locus_tag=NC_000915_01182;product=UDP-N-acetylglucosamine-N-acetylmuramyl- (pentapeptide) pyrophosphoryl-undecaprenol N- acetylglucosamine transferase	4		Fst > 0.6	ID=NC_000915_01254;Name=HP1222;gene=HP1222;inference=ab initio prediction:Prodigal:002006,similar to AA sequence:Hp26695_curated_for_HpGP.faa:AAD08264.1;locus_tag=NC_000915_01254;product=D-lactate dehydrogenase	3		Fst > 0.6	ID=NC_000915_01530;Name=HP1501;gene=HP1501;inference=ab initio prediction:Prodigal:002006,similar to AA sequence:Hp26695_curated_for_HpGP.faa:AAD08546.1;locus_tag=NC_000915_01530;product=Outer membrane protein HorK	5
-Log10(P-value) > 5	ID=NC_000915_01370;Name=HP1339;gene=HP1339;inference=ab initio prediction:Prodigal:002006,similar to AA sequence:Hp26695_curated_for_HpGP.faa:AAD08381.1;locus_tag=NC_000915_01370;product=Biopolymer transport protein ExbB	1		-Log10(P-value) > 5	ID=NC_000915_00868;Name=HP0850;gene=HP0850;inference=ab initio prediction:Prodigal:002006,similar to AA sequence:Hp26695_curated_for_HpGP.faa:AAD07898.1;locus_tag=NC_000915_00868;product=Type I restriction enzyme M protein M.HpyAXIII	1		Fst > 0.6	ID=NC_000915_01259;Name=HP1227;gene=HP1227;inference=ab initio prediction:Prodigal:002006,similar to AA sequence:Hp26695_curated_for_HpGP.faa:AAD08272.1;locus_tag=NC_000915_01259;product=Cytochrome c-553	1		Fst > 0.6	ID=NC_000915_01254;Name=HP1222;gene=HP1222;inference=ab initio prediction:Prodigal:002006,similar to AA sequence:Hp26695_curated_for_HpGP.faa:AAD08264.1;locus_tag=NC_000915_01254;product=D-lactate dehydrogenase	5		Fst > 0.6	ID=NC_000915_00995;Name=HP0973;gene=HP0973;inference=ab initio prediction:Prodigal:002006,similar to AA sequence:Hp26695_curated_for_HpGP.faa:AAD08028.1;locus_tag=NC_000915_00995;product=Hypothetical protein HP0973	3		Fst > 0.6	ID=NC_000915_01370;Name=HP1339;gene=HP1339;inference=ab initio prediction:Prodigal:002006,similar to AA sequence:Hp26695_curated_for_HpGP.faa:AAD08381.1;locus_tag=NC_000915_01370;product=Biopolymer transport protein ExbB	3		Fst > 0.6	ID=NC_000915_00293;Name=HP0289;gene=HP0289;inference=ab initio prediction:Prodigal:002006,similar to AA sequence:Hp26695_curated_for_HpGP.faa:AAD07355.1;locus_tag=NC_000915_00293;product=Putative vacuolating cytotoxin (VacA)-like protein ImaA	5
-Log10(P-value) > 5	ID=NC_000915_01389;Name=HP1358;gene=HP1358;inference=ab initio prediction:Prodigal:002006,similar to AA sequence:Hp26695_curated_for_HpGP.faa:AAD08408.1;locus_tag=NC_000915_01389;product=Hypothetical protein HP1358	1		-Log10(P-value) > 5	ID=NC_000915_00690;Name=HP0672;gene=HP0672;inference=ab initio prediction:Prodigal:002006,similar to AA sequence:Hp26695_curated_for_HpGP.faa:AAD07733.1;locus_tag=NC_000915_00690;product=Aspartate aminotransferase	1		Fst > 0.6	ID=NC_000915_00934;Name=HP0914;gene=HP0914;inference=ab initio prediction:Prodigal:002006,similar to AA sequence:Hp26695_curated_for_HpGP.faa:AAD07966.1;locus_tag=NC_000915_00934;product=Outer membrane protein HofG	1		Fst > 0.6	ID=NC_000915_00562;Name=HP0547;gene=HP0547;inference=ab initio prediction:Prodigal:002006,similar to AA sequence:Hp26695_curated_for_HpGP.faa:AAD07614.1;locus_tag=NC_000915_00562;product=CagPAI Type IV secretion system oncogenic effector CagA	5		Fst > 0.6	ID=NC_000915_01274;Name=HP1243;gene=HP1243;inference=ab initio prediction:Prodigal:002006,similar to AA sequence:Hp26695_curated_for_HpGP.faa:AAD08288.1;locus_tag=NC_000915_01274;product=Blood group antigen binding adhesin BabA	3		Fst > 0.6	ID=NC_000915_00527;Name=HP0512;gene=HP0512;inference=ab initio prediction:Prodigal:002006,similar to AA sequence:Hp26695_curated_for_HpGP.faa:AAD07575.1;locus_tag=NC_000915_00527;product=Glutamine synthetase GlnA	3		Fst > 0.6	ID=NC_000915_00932;Name=HP0912;gene=HP0912;inference=ab initio prediction:Prodigal:002006,similar to AA sequence:Hp26695_curated_for_HpGP.faa:AAD07960.1;locus_tag=NC_000915_00932;product=Outer membrane protein AlpA/HopC	5
[truncated: 75 more rows]

## Sheet: Extended Data Table 5
Extended Data Table 5| Summary of PCA results for environmental variables. Shows the loading coefficients of environmental variables on each principal component, reflecting the direction and magnitude of contribution of each variable to the corresponding principal component. Variance lists the variance explained ratio (Variance ratio) for each principal component (PC1-PC5).
	PC1	PC2	PC3	PC4	PC5
Elevation	-0.162919	0.750024	0.604678	-0.204157	0.060041
Solar radiation	0.45515	0.451878	-0.188323	0.616926	-0.415429
Temperature	0.560884	-0.077217	0.248293	0.225567	0.752939
Water vapor pressure	0.466759	-0.381837	0.571638	-0.231019	-0.506158
Latitude	-0.483571	-0.285495	0.45878	0.688093	-0.026484
Variance ratio	0.576965	0.267694	0.0871031	0.0526299	0.0156077

## Sheet: Extended Data Table 6
Extended Data Table 6 | Clinical characteristics of hosts and antibiotic susceptibility profiles of H. pylori isolates from Lhasa and Chengdu. Host clinical phenotypes and bacterial resistance to amoxicillin (AML), tetracycline (TE), metronidazole (MTZ), levofloxacin (LEV), clarithromycin (CLR) and rifampicin (RIF) are presented. Clinical data on gastric atrophy, atrophy score, intestinal metapla…
[truncated: 240 more rows]

[truncated: 3 more sheets: Extended Data Table 7, Extended Data Table 8, Extended Data Table 9]
